# Supplementary material for: Cerberus-type N-heterocyclic carbenes: synthesis and study of the first tritopic carbenes with D3h-symmetry
Source: Royal Society of Chemistry journal article supplement (doi:10.1039/c0cc01070g), 2010-01-01

## Supporting Information

### Cerberus-type N-Heterocyclic Carbenes: Synthesis and Study of the First Tritopic

#### Carbenes with $D_{3h}$ -Symmetry

*Kyle A. Williams and Christopher W. Bielawski\**

Department of Chemistry and Biochemistry, The University of Texas at Austin,  
1 University Station A5300, Austin, TX 78712, USA

E-mail: bielawski@cm.utexas.edu

|                                                                                                                       |         |
|-----------------------------------------------------------------------------------------------------------------------|---------|
| Experimental Procedures                                                                                               | S2–S6   |
| Figure S1. ORTEP diagram of 9,10-dihexylanthracene                                                                    | S6      |
| Figure S2. ORTEP diagram of 9,10-dihexyltriptycene                                                                    | S6      |
| Figure S3. ORTEP diagram of <b>5</b> showing disorder                                                                 | S7      |
| Table S1. Selected crystallographic data for <b>1b</b> , <b>5</b> , 9,10-dihexylanthracene and 9,10-dihexyltriptycene | S8      |
| Spectra                                                                                                               |         |
| $^1\text{H}$ and $^{13}\text{C}$ NMR spectra of <b>3a</b>                                                             | S9–S15  |
| $^1\text{H}$ and $^{13}\text{C}$ NMR spectra of <b>4a</b>                                                             | S16–S21 |
| $^1\text{H}$ and $^{13}\text{C}$ NMR spectra of <b>1a</b>                                                             | S22–S30 |
| $^1\text{H}$ and $^{13}\text{C}$ NMR spectra of 9,10-dihexylanthracene                                                | S31–S36 |
| $^1\text{H}$ and $^{13}\text{C}$ NMR spectra of 9,10-dihexyltriptycene                                                | S37–S44 |
| $^1\text{H}$ and $^{13}\text{C}$ NMR spectra of <b>2b</b>                                                             | S45–S51 |
| $^1\text{H}$ and $^{13}\text{C}$ NMR spectra of <b>3b</b>                                                             | S52–S61 |
| $^1\text{H}$ and $^{13}\text{C}$ NMR spectra of <b>4b</b>                                                             | S62–S70 |
| $^1\text{H}$ and $^{13}\text{C}$ NMR spectra of <b>1b</b>                                                             | S71–S81 |
| $^1\text{H}$ and $^{13}\text{C}$ NMR spectra of <b>5</b>                                                              | S82–S90 |

**General Considerations.** Unless otherwise noted, all reactions were performed under an atmosphere of nitrogen using standard Schlenk techniques or inside of a nitrogen-filled drybox. Toluene and tetrahydrofuran (THF) were distilled from calcium hydride or sodium and benzophenone under a nitrogen atmosphere prior to use.  $^1\text{H}$  NMR spectra were recorded using a Varian Gemini spectrometer. Chemical shifts are reported in delta ( $\delta$ ) units and expressed in parts per million (ppm) downfield from tetramethylsilane using the residual protio solvent as an internal standard ( $\text{CDCl}_3$ , 7.24 ppm;  $\text{C}_6\text{D}_6$ , 7.15 ppm;  $\text{DMSO}-d_6$ , 2.49 ppm).  $^{13}\text{C}$  NMR spectra were recorded using a Varian Gemini spectrometer. Chemical shifts are reported in delta ( $\delta$ ) units and expressed in parts per million (ppm) downfield from tetramethylsilane using the solvent as an internal standard ( $\text{CDCl}_3$ , 77.0 ppm;  $\text{C}_6\text{D}_6$ , 128.0 ppm;  $\text{DMSO}-d_6$ , 39.5 ppm).  $^{13}\text{C}$  NMR spectra were routinely run with broadband decoupling. IR spectra were recorded using Perkin-Elmer Spectrum BX FT-IR system. High-resolution mass spectra (HRMS) were obtained with a VG analytical ZAB2-E or a Karatos MS9 instrument and are reported as  $m/z$  (relative intensity). Melting points were obtained with a Mel-Temp apparatus and are uncorrected.

**9,10-Dibutyl-2,3,6,7,12,13-hexakis-N-tert-butylaminotriptycene 3a.** A coupling catalyst was prepared by charging a 20 mL vial with 1,3-bis(2,6-diisopropylphenyl)imidazolium chloride (42 mg, 0.10 mmol),  $\text{NaOtBu}$  (15 mg, 0.15 mmol),  $\text{Pd}(\text{OAc})_2$  (13 mg, 0.05 mmol), toluene (5 mL), and a magnetic stir bar. After stirring this mixture at ambient temperature for 10 min, the catalyst solution was added to a 30 mL vial with a Teflon-lined cap containing 2,3,6,7,12,13-hexabromo-9,10-dibutyltriptycene<sup>1</sup> (0.560 g, 0.667 mmol) suspended in toluene (20 mL). Afterward, *tert*-butyl amine (0.300 g, 4.00 mmol) and  $\text{NaOtBu}$  (0.384 g, 4.00 mmol) were added and the resulting mixture was sealed and stirred at 110 °C for 16 h. The reaction was then cooled to ambient temperature, filtered through Celite, rinsed with toluene and concentrated to dryness to afford the desired product as a dark brown powder (0.476 g, 90% yield). m.p. 315–318 °C (dec., color changed from dark brown to orange).  $^1\text{H}$  NMR (400 MHz,  $\text{CDCl}_3$ ):  $\delta$  6.84 (s, 6H), 3.40 (s, 6H), 2.63 (t,  $J = 7.6$  Hz, 4H), 2.13 (br p, 4H), 1.75 (sextet,  $J = 7.6$  Hz, 4H), 1.20 (s, 54H), 1.06 (t,  $J = 7.2$  Hz, 6H).  $^{13}\text{C}$  NMR (100 MHz,  $\text{CDCl}_3$ , 50 °C):  $\delta$  141.7, 133.9, 115.5, 51.9, 51.2, 30.2, 28.8, 28.0, 25.1, 14.2. HRMS:  $m/z$  calcd for  $\text{C}_{52}\text{H}_{85}\text{N}_6$  [ $\text{M}+\text{H}^+$ ] 793.6824, found 793.6830.

**Tris(azolium) 4a.** A 50 mL round bottomed flask was charged with **3a** (0.350 g, 0.442 mmol), triethylorthoformate (20 mL), and a magnetic stir bar. Tetrafluoroboric acid etherate (0.19 mL, 1.32 mmol) was added and the resulting mixture was stirred in the open flask at 110 °C for 18 h. After cooling to ambient temperature, the mixture was poured into  $\text{Et}_2\text{O}$  (150 mL) and the precipitated solids were collected via filtration to obtain the desired product as a light tan powder (0.393 g, 96% yield). m.p. 365–372 °C (dec., color changed from light tan to dark brown).  $^1\text{H}$  NMR (400 MHz,  $\text{DMSO}-d_6$ ):  $\delta$  8.84 (s, 3H), 8.04 (br s, 6H), 3.51 (br s, 4H), 2.04 (br s, 8H), 1.79 (s, 54H), 1.06 (br s, 6H).  $^{13}\text{C}$  NMR (100 MHz,  $\text{DMSO}-d_6$ , 120 °C):  $\delta$  143.4, 138.8, 128.4, 110.3, 61.0, 52.5, 28.0, 27.3, 26.3, 23.7, 13.4. HRMS:  $m/z$  calcd for  $\text{C}_{55}\text{H}_{81}\text{B}_2\text{F}_8\text{N}_6$  [ $\text{M}^+$ ] 999.6575, found 999.6575.

<sup>1</sup> C. L. Hilton, C. R. Jamison, H. K. Zane and B. T. King *J. Org. Chem.*, 2009, **74**, 405–407.

**Tris(NHC) 1a.** A 30 mL vial with a Teflon-lined cap was charged with **4a** (0.250 g, 0.230 mmol), NaH (0.017 g, 0.691 mmol), KO<sup>t</sup>Bu (1 mg), THF (10 mL) and a magnetic stir bar. After stirring at ambient temperature for 20 h, the resulting reaction mixture was filtered through a 0.45 μm PTFE filter into a 100 mL round bottom flask and then concentrated to dryness under reduced pressure to afford the desired product as a brown powder (0.178 g, 94% yield). m.p. 250–255 °C (dec.) <sup>1</sup>H NMR (400 MHz, C<sub>6</sub>D<sub>6</sub>): δ 7.89 (s, 6H), 3.33 (br s, 4H), 2.39 (br s, 4H), 1.89 (sextet, *J* = 7.2 Hz, 4H), 1.77 (s, 54H), 1.14 (t, *J* = 7.2 Hz). <sup>13</sup>C NMR (125 MHz, C<sub>6</sub>D<sub>6</sub>, 60 °C): δ 225.8, 164.1, 132.9, 108.2, 67.8, 57.2, 30.9, 30.2, 28.8, 25.8, 14.5. HRMS: *m/z* calcd for C<sub>55</sub>H<sub>79</sub>N<sub>6</sub> [M+H<sup>+</sup>] 823.63607, found 823.63582.

**9,10-Dihexylanthracene.** Using a modified literature procedure,<sup>1</sup> a 1 L round-bottom flask was charged with anthraquinone (7.5 g, 36 mmol), anisole (150 mL), and a magnetic stir bar. The reaction vessel was then sealed with a rubber septum, purged with nitrogen and cooled to 0 °C in an ice bath. Hexyllithium (180 mmol, 1.8 M in hexanes) was then added via cannula over 5 min and the resulting reaction mixture was allowed to warm to ambient temperature. After 24 h, the reaction was quenched by adding an aqueous solution saturated with ammonium chloride. The organic layer was separated, washed with water (2 × 200 mL), dried over sodium sulfate and concentrated under reduced pressure to yield a reddish-brown residue. The residue was dissolved in THF (60 mL) and added dropwise to a mixture of SnCl<sub>2</sub> (40.6 g, 180 mmol) in acetic acid (240 mL) while stirring at ambient temperature. The suspension was stirred for 24 h, at which time the organic material was extracted with hexanes (600 mL), rinsed with 5% aqueous ammonium hydroxide solution (500 mL), dried over sodium sulfate and concentrated to dryness. The collected solid was then dissolved in a minimum amount of hexanes, passed through a short column of silica using hexanes as the eluent, and then concentrated to dryness to afford the desired product as a fluffy, bright yellow solid (4.73 g, 38% yield). Single yellow crystals were grown by slow evaporation of a saturated CDCl<sub>3</sub> solution. m.p. 67–69 °C. <sup>1</sup>H NMR (400 MHz, CDCl<sub>3</sub>): δ 8.29 (q, *J* = 3.3 Hz, 4H), 7.47 (q, *J* = 3.5 Hz, 4H), 3.57 (t, *J* = 8.4 Hz, 4H), 1.80 (m, 4H), 1.59 (p, *J* = 7.4 Hz, 4H), 1.37 (m, 8H), 0.91 (t, *J* = 7.2 Hz, 6H). <sup>13</sup>C NMR (100 MHz, CDCl<sub>3</sub>): δ 133.9, 129.3, 125.2, 124.7, 31.8, 31.4, 30.1, 28.2, 22.7, 14.1. HRMS: *m/z* calcd for C<sub>26</sub>H<sub>34</sub> [M<sup>+</sup>] 346.2655, found 346.2655.

**9,10-Dihexyltritycene.** Using a modified literature procedure,<sup>1</sup> anthranillic acid (4.00 g, 28.8 mmol) was dissolved in THF (175 mL) and added dropwise over 2.5 h to a refluxing mixture of isoamyl nitrite (4.0 mL, 30 mmol) and 9,10-dihexylanthracene (4.00 g, 11.6 mmol) in CHCl<sub>3</sub>. After refluxing the resulting mixture for an additional 15 min, the residual solvent was evaporated. The remaining residue was then dissolved in xylenes (175 mL), and maleic anhydride (1.75 g, 17.8 mmol) was added. This mixture was refluxed for 15 min at 162 °C and then allowed to cool to ambient temperature. The mixture was rinsed with water (200 mL), filtered through a short column of silica gel using xylenes as the eluent, and then concentrated under reduced pressure. After standing for 2 h, the residue solidified into a dark orange-brown material, which was rinsed with cold acetone. Subsequent removal of the residual solvent afforded the desired product as a white powder (1.44 g, 30% yield). A second crop of product crystallized via slow

evaporation of the acetone rinse (2.54 g, 53%; combined yield = 3.98 g, 83%). The second crop of product was isolated as single, colorless, rectangular crystals that were suitable for X-ray diffraction analysis. m.p. 155–157 °C. <sup>1</sup>H NMR (500 MHz, CDCl<sub>3</sub>, 50 °C): δ 7.36 (dd, *J* = 3.3, 2.8 Hz, 6H), 6.97 (dd, *J* = 3.3, 2.5 Hz, 6H), 2.88 (t, *J* = 7.8 Hz, 4H), 2.15 (m, 4H), 1.80 (p, *J* = 7.5 Hz, 4H), 1.43–1.56 (m, 8H), 0.99 (t, *J* = 7.3 Hz, 6H). <sup>13</sup>C NMR (125 MHz, CDCl<sub>3</sub>, 50 °C): δ 148.4, 124.4, 122.1, 53.2, 32.0, 31.6, 28.6, 25.4, 22.8, 14.1. HRMS: *m/z* calcd for C<sub>32</sub>H<sub>39</sub> [M+H<sup>+</sup>] 423.3052, found 423.3054.

**2,3,6,7,14,15-Hexabromo-9,10-dihexyltritycene (2b).** Using a modified literature procedure,<sup>1</sup> a 250 mL round-bottom flask was charged with 9,10-dihexyltritycene (1.00 g, 2.4 mmol), iron powder (0.050 g, 0.895 mmol), CHCl<sub>3</sub> (stabilized with amylene, 80 mL) and a magnetic stir bar. After adding bromine (0.75 mL, 14.6 mmol) to the mixture, the flask was equipped with a water-jacketed condenser and heated at 80 °C. After 1 h, the reaction was cooled to ambient temperature. The residual solvent was evaporated under reduced pressure. The resulting solid was then redissolved in CHCl<sub>3</sub> (stabilized with amylene) and filtered through a short column of silica gel using CHCl<sub>3</sub> (stabilized with amylene) as the eluent. The residual solvent was then evaporated under reduced pressure to afford the crude product (2.84 g) as an orange solid. The crude material was rinsed with cold acetone and filtered to yield the desired product in pure form as a white powder (1.73 g, 82% yield). Single colorless crystals were grown from a saturated hexanes solution at 0 °C or via slow cooling of a saturated ethyl acetate solution. m.p. 292–294 °C. <sup>1</sup>H NMR (500 MHz, CDCl<sub>3</sub>, 50 °C): δ 7.56 (s, 6H), 2.73 (t, *J* = 7.8 Hz, 4H), 2.01 (m, 4H), 1.81 (p, *J* = 7.5 Hz, 4H), 1.47–1.59 (m, 8H), 1.02 (t, *J* = 7.3 Hz, 6H). <sup>13</sup>C NMR (125 MHz, CDCl<sub>3</sub>, 50 °C): δ 147.3, 127.9, 121.5, 52.3, 31.7, 31.2, 27.7, 24.9, 22.6, 14.0. HRMS: *m/z* calcd for C<sub>32</sub>H<sub>33</sub><sup>79</sup>Br<sub>3</sub><sup>81</sup>Br<sub>3</sub> [M+H<sup>+</sup>] 896.7621, found 896.7604.

**2,3,6,7,14,15-Hexa-*tert*-butylamino-9,10-dihexyltritycene 3b.** A coupling catalyst was prepared by charging a 20 mL vial with 1,3-bis(2,6-diisopropylphenyl)imidazolium chloride (0.042 g, 0.1 mmol), NaOtBu (0.015 g, 0.15 mmol), Pd(OAc)<sub>2</sub> (0.013 g, 0.05 mmol), toluene (5 mL), and a magnetic stir bar followed by stirring this mixture at ambient temperature for 10 min. The catalyst solution was added to a 30 mL vial containing **2b** (1.00 g, 1.12 mmol) suspended in toluene (20 mL). Afterward, *tert*-butyl amine (0.500 g, 0.71 mL, 6.84 mmol) and NaOtBu (0.644 g, 6.70 mmol) were added and the resulting mixture was sealed and stirred at 110 °C for 16 h. The reaction mixture was cooled to ambient temperature, filtered through Celite, rinsed with toluene and concentrated to afford the desired product as a dark brown powder (0.920 g, 95% yield). Single light brown crystals were grown from a saturated hexanes solution at 0 °C. m.p. 224–227 °C. <sup>1</sup>H NMR (500 MHz, CDCl<sub>3</sub>, 50 °C): δ 6.85 (s, 6H), 3.40 (br s, 6H), 2.64 (t, *J* = 8.0 Hz, 4H), 2.17 (m, 4H), 1.75 (p, *J* = 7.4 Hz, 4H), 1.45 (m, 8H), 1.22 (s, 54H), 0.96 (t, *J* = 7.3 Hz, 6H). <sup>13</sup>C NMR (125 MHz, CDCl<sub>3</sub>, 50 °C): δ 141.7, 133.9, 115.6, 51.8, 51.3, 32.2, 31.7, 30.2, 29.1, 25.8, 22.7, 14.1. HRMS: *m/z* calcd for C<sub>56</sub>H<sub>93</sub>N<sub>6</sub> [M+H<sup>+</sup>] 849.7378, found 849.7456.

**Tris(azolium) 4b.** A 50 mL round-bottomed flask was charged with **3b** (0.500 g, 0.581 mmol), triethylorthoformate (20 mL) and a magnetic stir bar. Tetrafluoroboric acid etherate (0.24 mL, 1.74 mmol) was then added and the reaction mixture was stirred in

the open flask at 110 °C for 18 h. After cooling to ambient temperature, the reaction was concentrated to dryness under reduced pressure. The vessel was then charged with Et<sub>2</sub>O (30 mL) and the solids which formed were broken up with a spatula, filtered, rinsed with Et<sub>2</sub>O (30 mL) and dried under reduced pressure to afford crude product as a tan powder. The crude material was suspended in CH<sub>2</sub>Cl<sub>2</sub> (10 mL) and filtered to afford the desired product in pure form as a pale tan solid (0.467 g, 70% yield). Single colorless crystals were grown from slow diffusion of diethyl ether or CH<sub>2</sub>Cl<sub>2</sub> into a saturated acetone solution at 0 °C. m.p. 375–380 °C (dec., color changed from tan to dark brown). <sup>1</sup>H NMR (500 MHz, DMSO-*d*<sub>6</sub>, 120 °C): δ 8.89 (s, 3H), 8.06 (s, 6H), 3.46 (t, *J* = 7.5 Hz, 4H), 2.21 (m, 4H), 2.06 (p, *J* = 7.5 Hz, 4H), 1.84 (s, 54H), 1.52–1.60 (m, 8H), 1.04 (t, *J* = 7.0 Hz, 6H). <sup>13</sup>C NMR (125 MHz, DMSO-*d*<sub>6</sub>, 120 °C): δ 143.4, 138.8, 128.4, 110.2, 61.0, 52.5, 31.0, 30.3, 28.0, 26.4, 25.0, 21.3, 13.1. HRMS: *m/z* calcd for C<sub>59</sub>H<sub>89</sub>BN<sub>6</sub>F<sub>4</sub> [M<sup>2+</sup>] 484.3584, found 484.3589.

**Tris(NHC) 1b.** Under an inert atmosphere, a 30 mL vial was charged with **4b** (0.100 g, 0.088 mmol), NaH (0.024 g, 1.00 mmol), KO*t*Bu (0.003 g, 0.027 mmol), THF (7 mL) and a magnetic stir bar. The vial was sealed and the reaction mixture was stirred at ambient temperature for 18 h. Afterward, the mixture was concentrated to dryness under reduced pressure. Hexanes (10 mL) were then added and the resulting mixture was stirred for 5 min at ambient temperature. The mixture was then filtered through a PTFE syringe filter (0.2 μm) and concentrated under reduced pressure to afford the desired product as a pale yellow powder (0.066 g, 86% yield). Single pale yellow crystals were grown from a saturated C<sub>6</sub>D<sub>6</sub> solution. m.p. 241–243 °C (dec.) <sup>1</sup>H NMR (600 MHz, C<sub>6</sub>D<sub>6</sub>, 60 °C): δ 7.88 (s, 6H), 3.33 (t, *J* = 7.5 Hz, 4H), 2.46 (p, *J* = 7.8 Hz, 4H), 1.95 (p, *J* = 7.8 Hz, 4H), 1.78 (s, 54H), 1.84 (s, 54H), 1.57 (p, *J* = 7.2 Hz, 4H), 1.50 (sextet, *J* = 7.2 Hz, 4H), 1.00 (t, *J* = 7.2 Hz, 6H). <sup>13</sup>C NMR (125 MHz, C<sub>6</sub>D<sub>6</sub>, 60 °C): δ 225.8, 142.0, 132.9, 108.2, 57.3, 53.2, 32.6, 32.4, 30.9, 30.4, 26.7, 23.1, 14.2. HRMS: *m/z* calcd for C<sub>59</sub>H<sub>87</sub>N<sub>6</sub> [M+H<sup>+</sup>] 879.69867, found 879.69755.

**Tris(thiourea) 5.** A 30 mL vial was charged with **1b** (0.050 g, 0.061 mmol), sulfur (0.100 g, 3.12 mmol), THF (6 mL) and a magnetic stir bar. The vial was then sealed and the mixture was stirred at ambient temperature for 16 h. Afterward, silica gel (0.5 g) was added and the reaction mixture was concentrated to dryness under reduced pressure. The resulting solid mixture was then placed in a fritted funnel and rinsed with hexanes (50 mL) to remove any residual sulfur. The material was then rinsed with methanol (25 mL) and the filtrate was concentrated to afford the desired product (50 mg, 90% yield) as a tan powder. Single colorless crystals were grown from a saturated C<sub>6</sub>D<sub>6</sub> solution. m.p. 210–212 °C (dec., color changed from pale yellow to orange). IR (KBr): ν<sub>CS</sub> = 1337 cm<sup>-1</sup>. <sup>1</sup>H NMR (500 MHz, CDCl<sub>3</sub>, 50 °C): δ 7.73 (s, 3H), 2.84 (t, *J* = 7.8 Hz, 4H), 2.20 (m, 4H), 2.05 (s, 54 H), 1.85 (p, *J* = 7.5 Hz, 4H), 1.49 (m, 8H), 1.01 (t, *J* = 7.0 Hz, 6H). <sup>13</sup>C NMR (150 MHz, CDCl<sub>3</sub>, 50 °C): δ 171.6, 140.7, 130.7, 107.5, 63.0, 51.9, 32.2, 31.8, 30.8, 29.2, 25.6, 22.7, 14.1. HRMS: *m/z* calcd for C<sub>59</sub>H<sub>87</sub>N<sub>6</sub>S<sub>3</sub> [M+H<sup>+</sup>] 975.6154, found 975.6148.

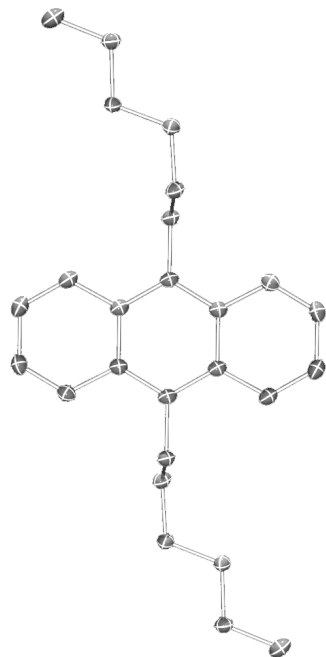

**Figure S1.** ORTEP diagram of 9,10-dihexylanthracene as generated using the POV-ray engine. Thermal ellipsoids were drawn at 50% probability. Hydrogen atoms have been omitted for clarity.

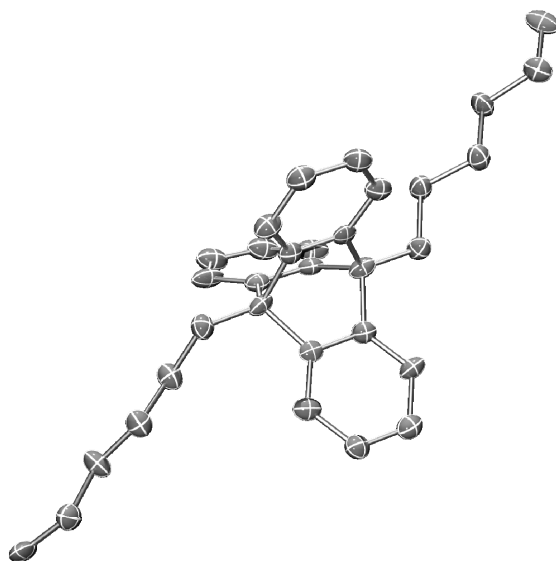

**Figure S2.** ORTEP diagram of 9,10-dihexyltripitycene as generated using the POV-ray engine. Thermal ellipsoids were drawn at 50% probability. Hydrogen atoms have been omitted for clarity.

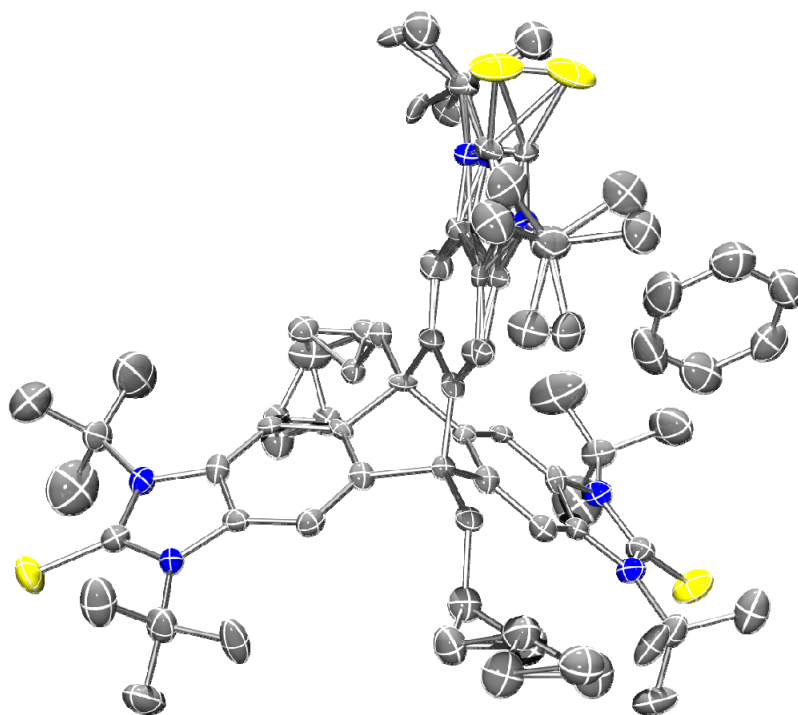

**Figure S3.** ORTEP diagram of **5** as generated using the POV-ray engine. Thermal ellipsoids were drawn at 50% probability. Hydrogen atoms have been omitted for clarity. Disorder along the mirror plane was appropriately modeled at a 50:50 ratio.





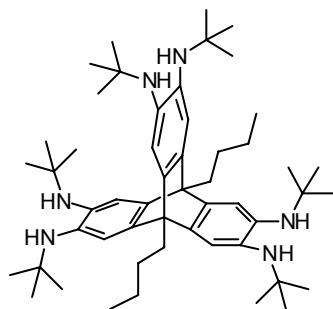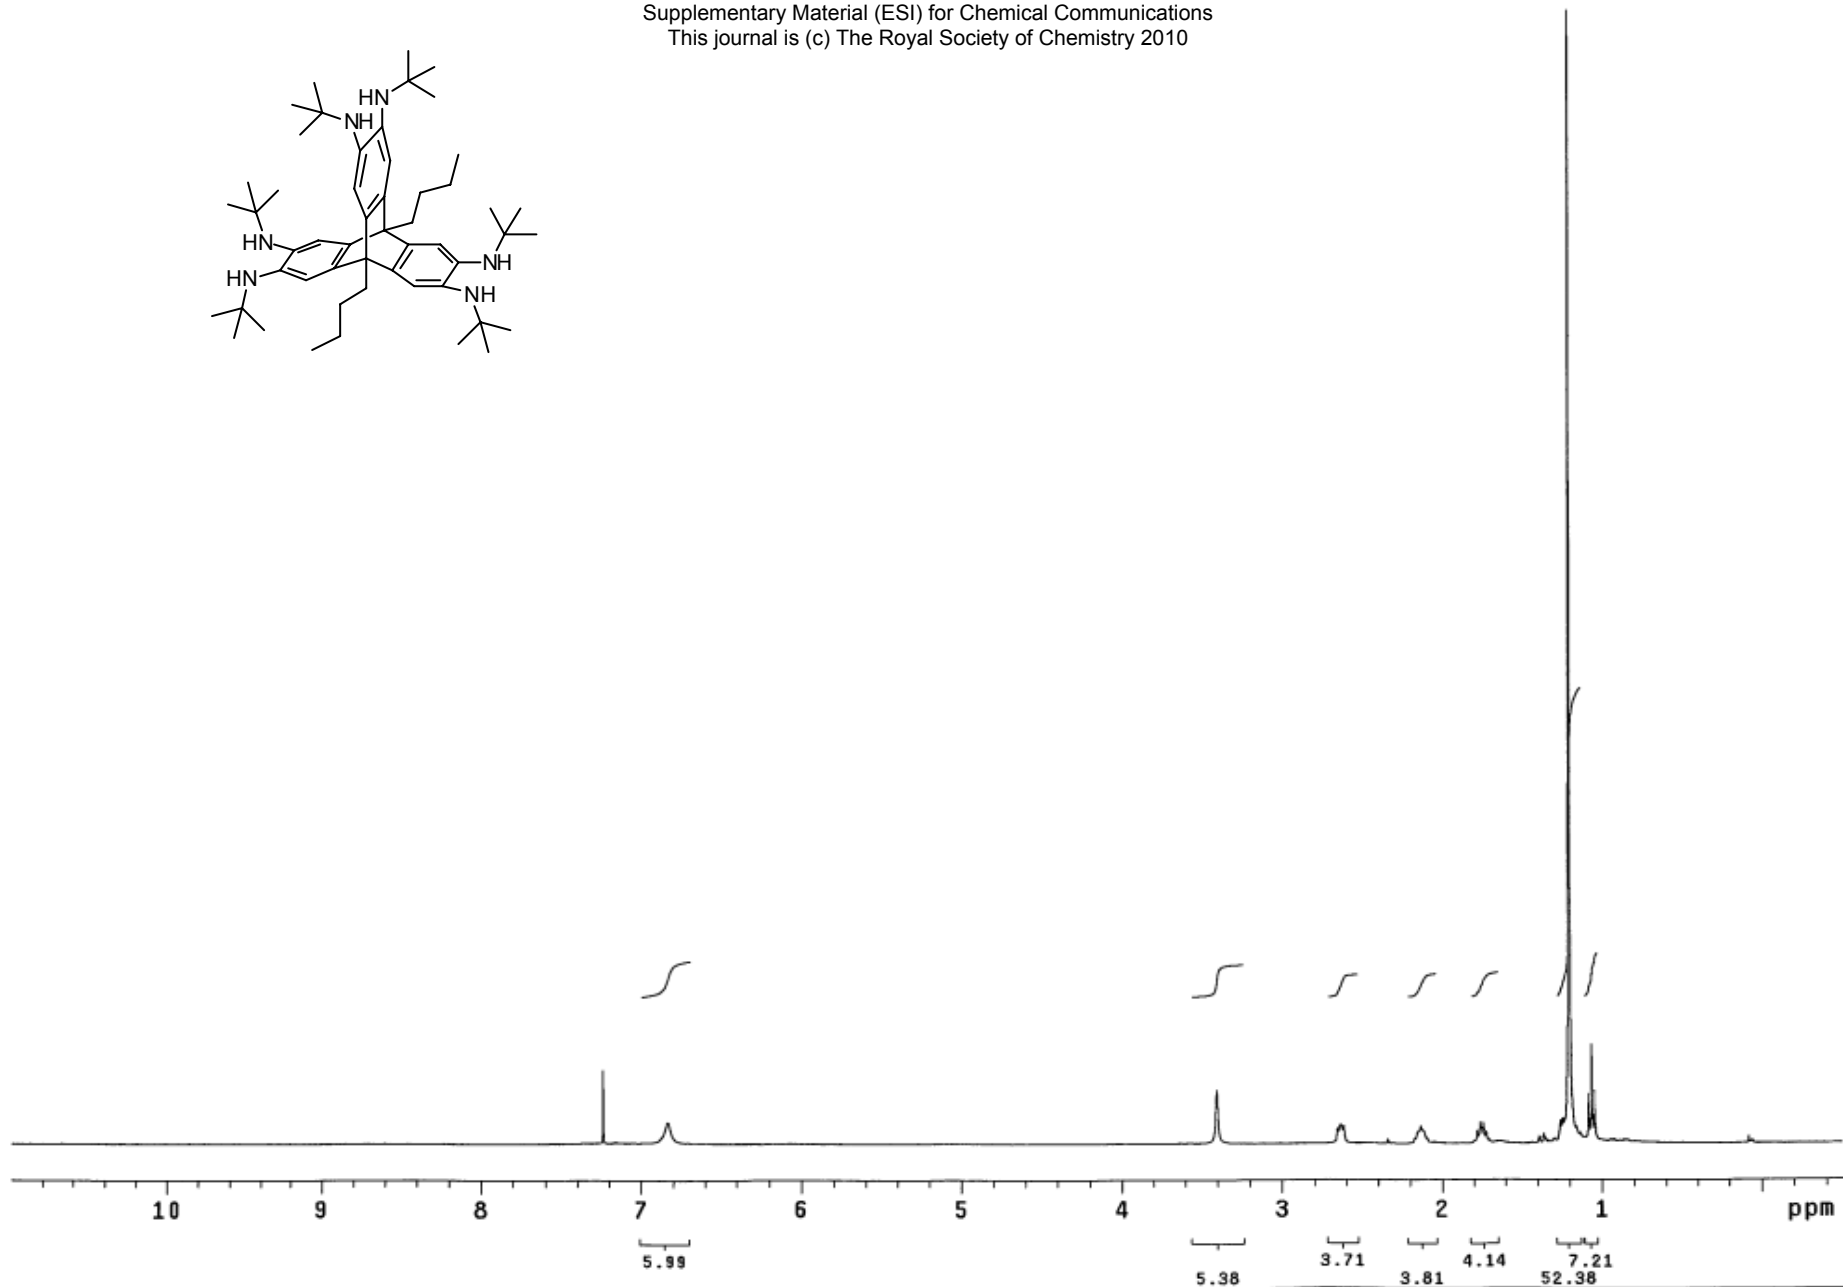

|                                                                                                                                   |                                |                                                                                           |  |                                                                                                                               |
|-----------------------------------------------------------------------------------------------------------------------------------|--------------------------------|-------------------------------------------------------------------------------------------|--|-------------------------------------------------------------------------------------------------------------------------------|
| <b>PULSE SEQUENCE</b><br>Relax. delay 2.000 sec<br>Pulse 16.4 degrees<br>Acq. time 2.856 sec<br>Width 5602.2 Hz<br>37 repetitions | <b>OBSERVE</b> H1, 400.2669859 | <b>DATA PROCESSING</b><br>Line broadening 0.1 Hz<br>FT size 32768<br>Total time 3 minutes |  | <b>KAW8-33</b><br>CDC13<br>7-2-09<br><br>Pulse Sequence: s2pu1<br>Solvent: CDC13<br>Ambient temperature<br>Mercury-400 "nmr6" |
|-----------------------------------------------------------------------------------------------------------------------------------|--------------------------------|-------------------------------------------------------------------------------------------|--|-------------------------------------------------------------------------------------------------------------------------------|

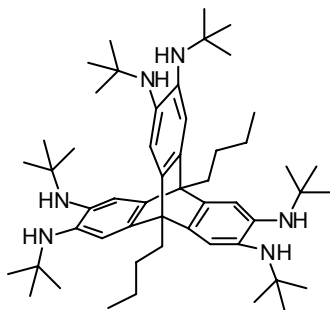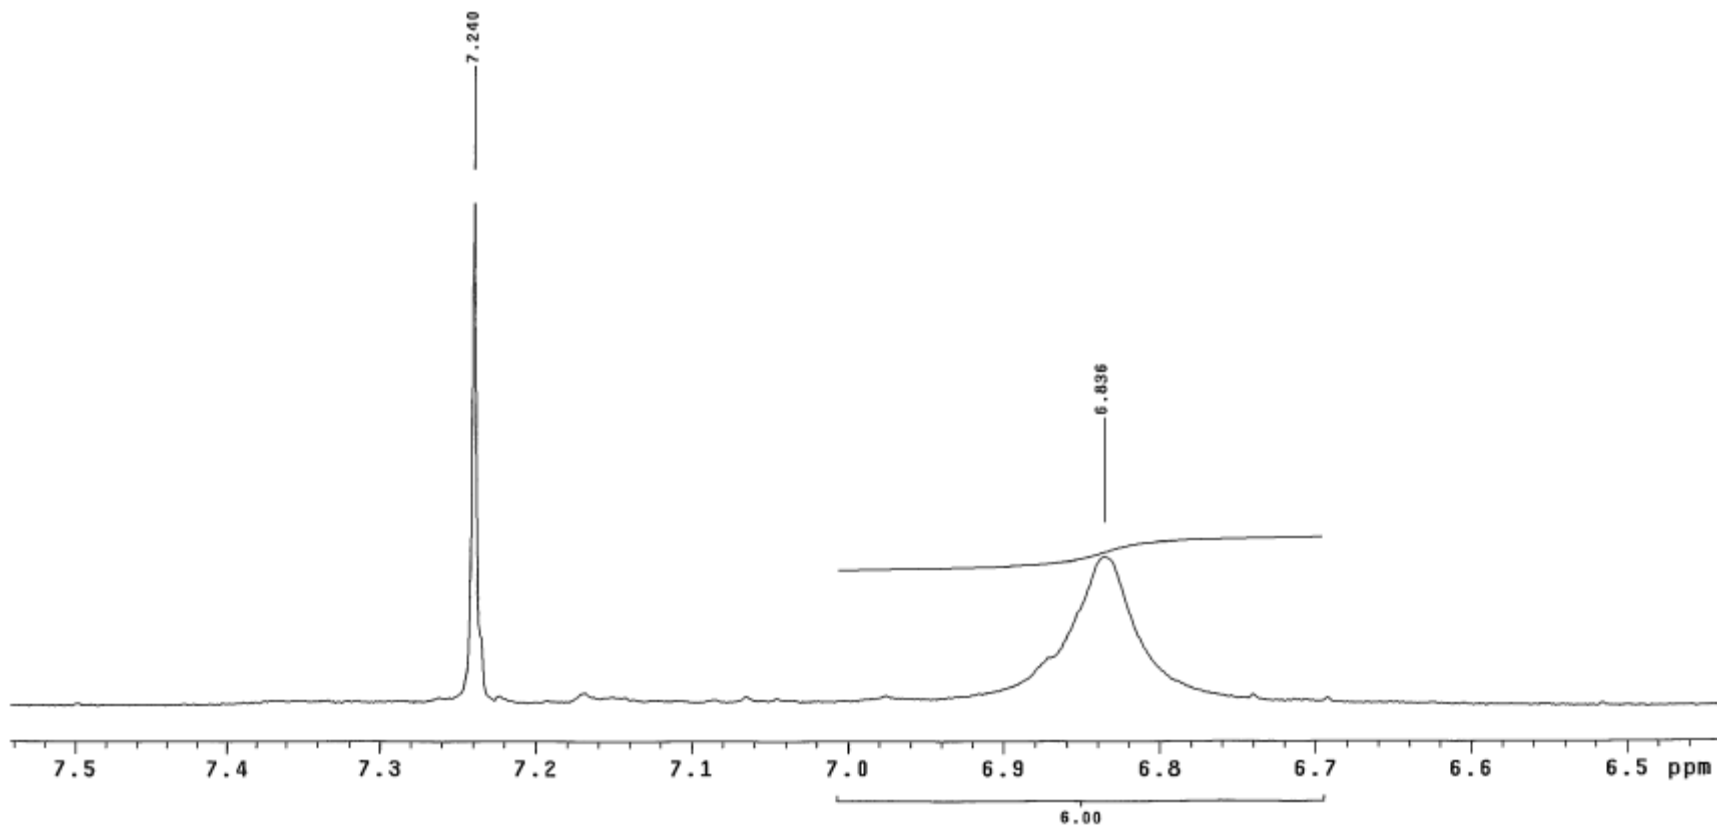

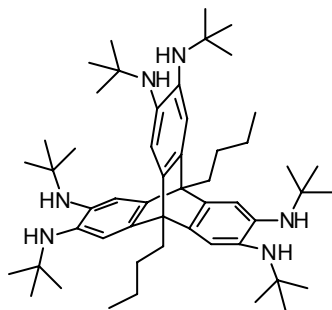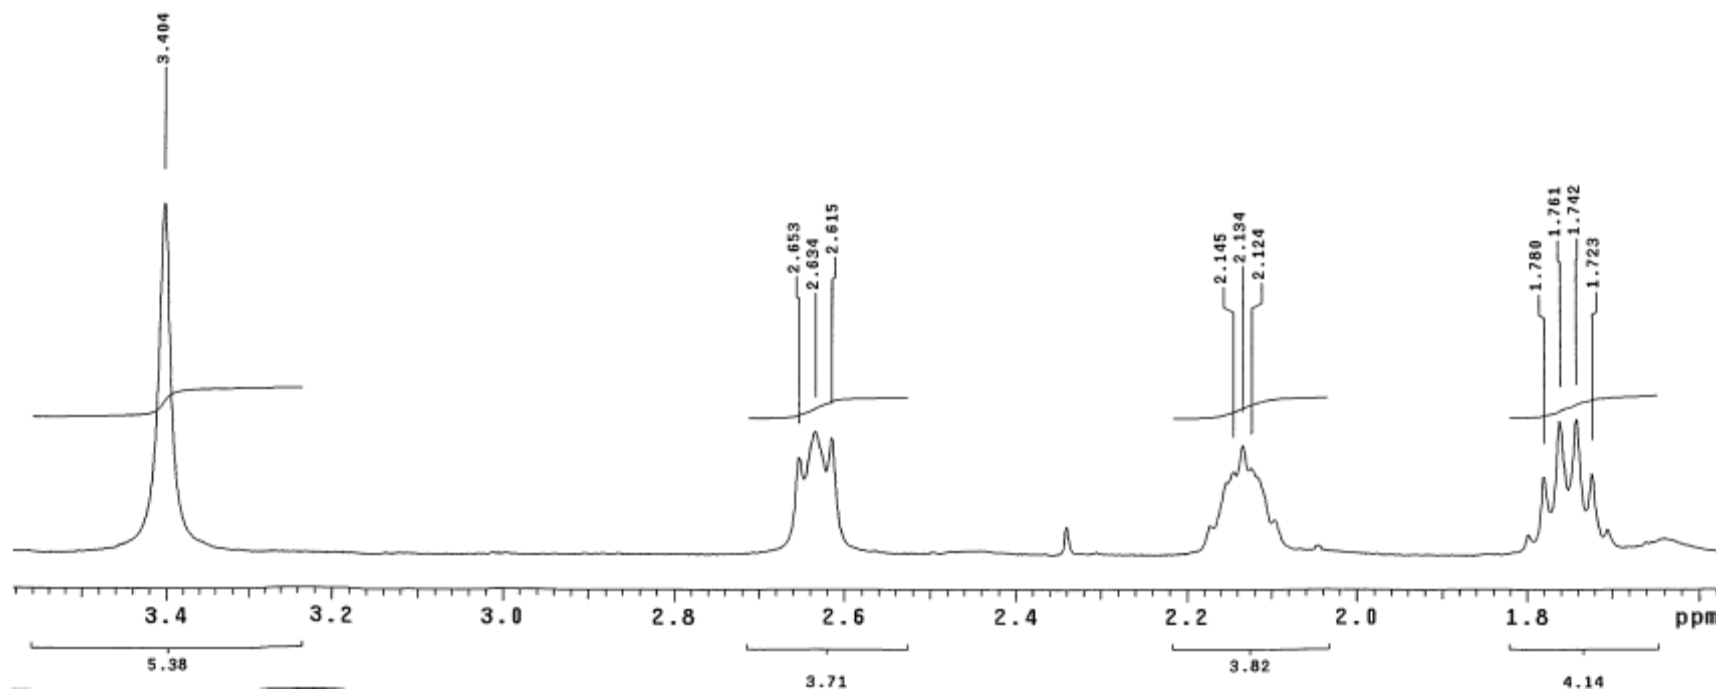

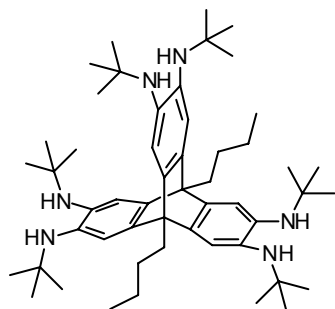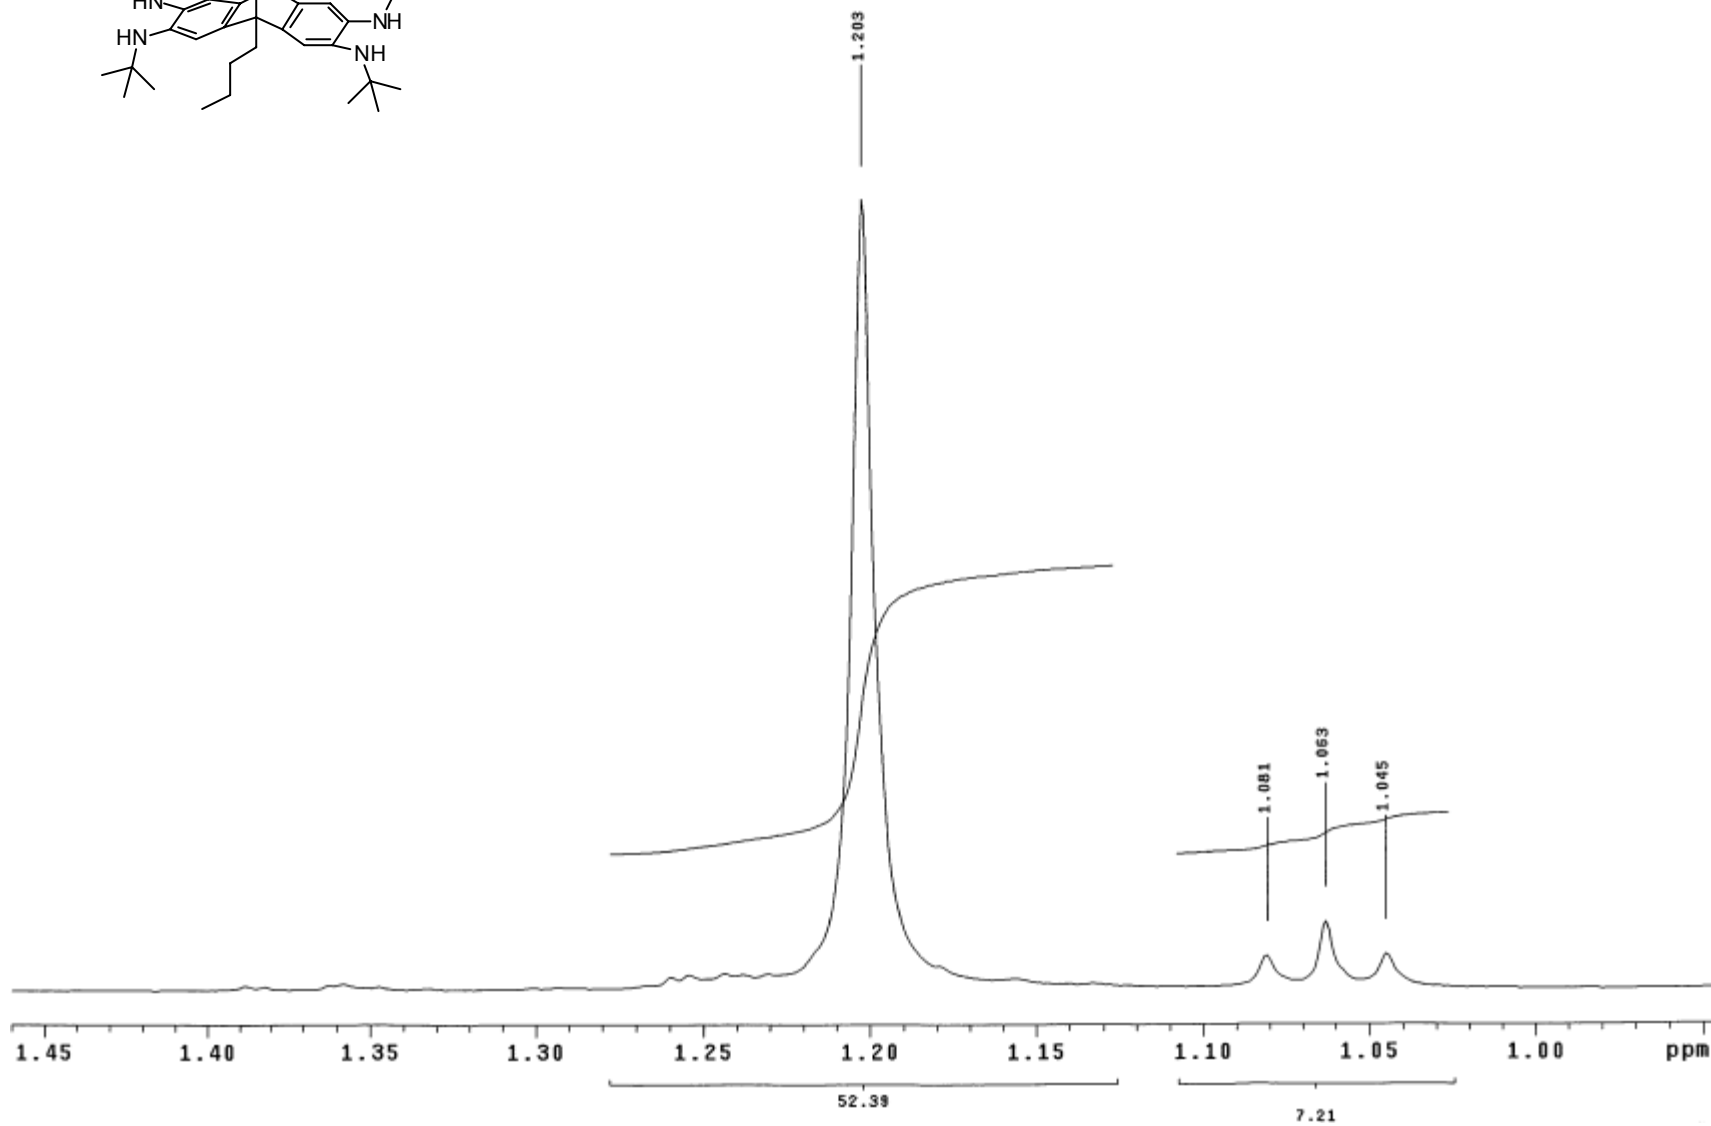

600 MHz nmrox

KAWB-53-2  
temp=50c

exp4 Carbon

|             |             |            |          |
|-------------|-------------|------------|----------|
| SAMPLE      |             | SPECIAL    |          |
| date        | Jul 28 2009 | temp       | 50.0     |
| solvent     | cdcl3       | gain       | 40       |
| file        | exp         | spin       | 20       |
| ACQUISITION |             | hst        | 0.008    |
| sw          | 36764.7     | pw90       | 7.800    |
| at          | 2.000       | alfa       | 10.000   |
| np          | 147058      | FLAGS      |          |
| fb          | 17000       | i1         | n        |
| bs          | 64          | in         | n        |
| d1          | 2.000       | dp         | y        |
| nt          | 1000        | hs         | nn       |
| ct          | 1000        | PROCESSING |          |
| TRANSMITTER |             | lb         | 10.00    |
| tn          | C13         | fn         | not used |
| sfrq        | 150.823     | DISPLAY    |          |
| tof         | 1542.3      | sp         | -754.2   |
| tpwr        | 58          | wp         | 30915.3  |
| pw          | 2.600       | rfl        | 14150.0  |
| DECOUPLER   |             | rfp        | 11612.2  |
| dn          | H1          | rp         | 17.8     |
| dof         | 0           | lp         | 30.0     |
| dm          | yyy         | PLOT       |          |
| dnn         | w           | wc         | 250      |
| dpwr        | 46          | sc         | 0        |
| dmf         | 15337       | vs         | 45974    |
|             |             | th         | 10       |
|             |             | ai         | cdc ph   |

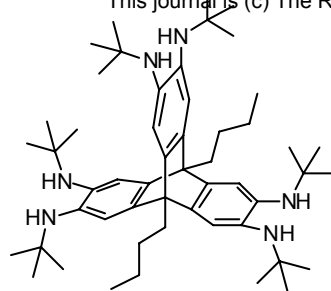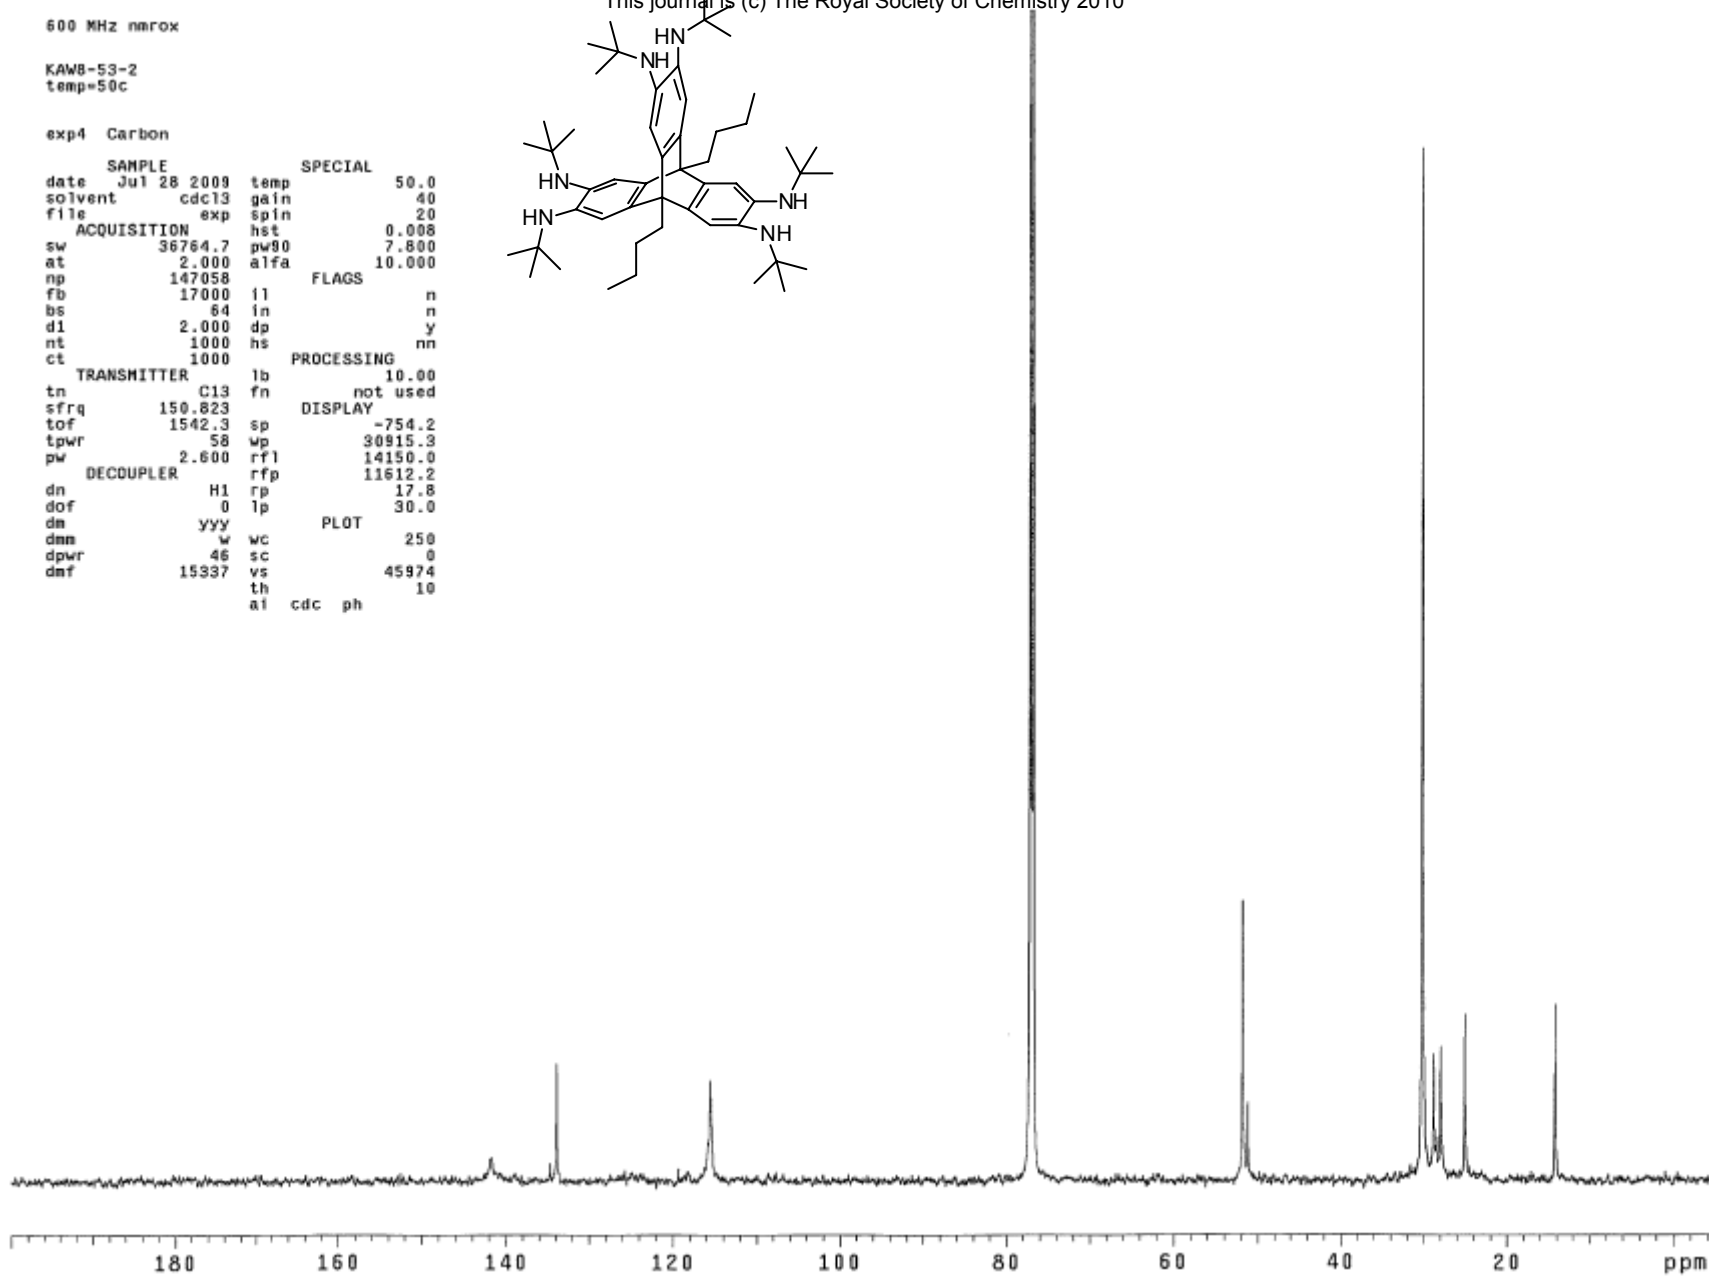

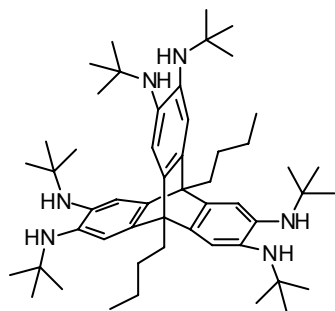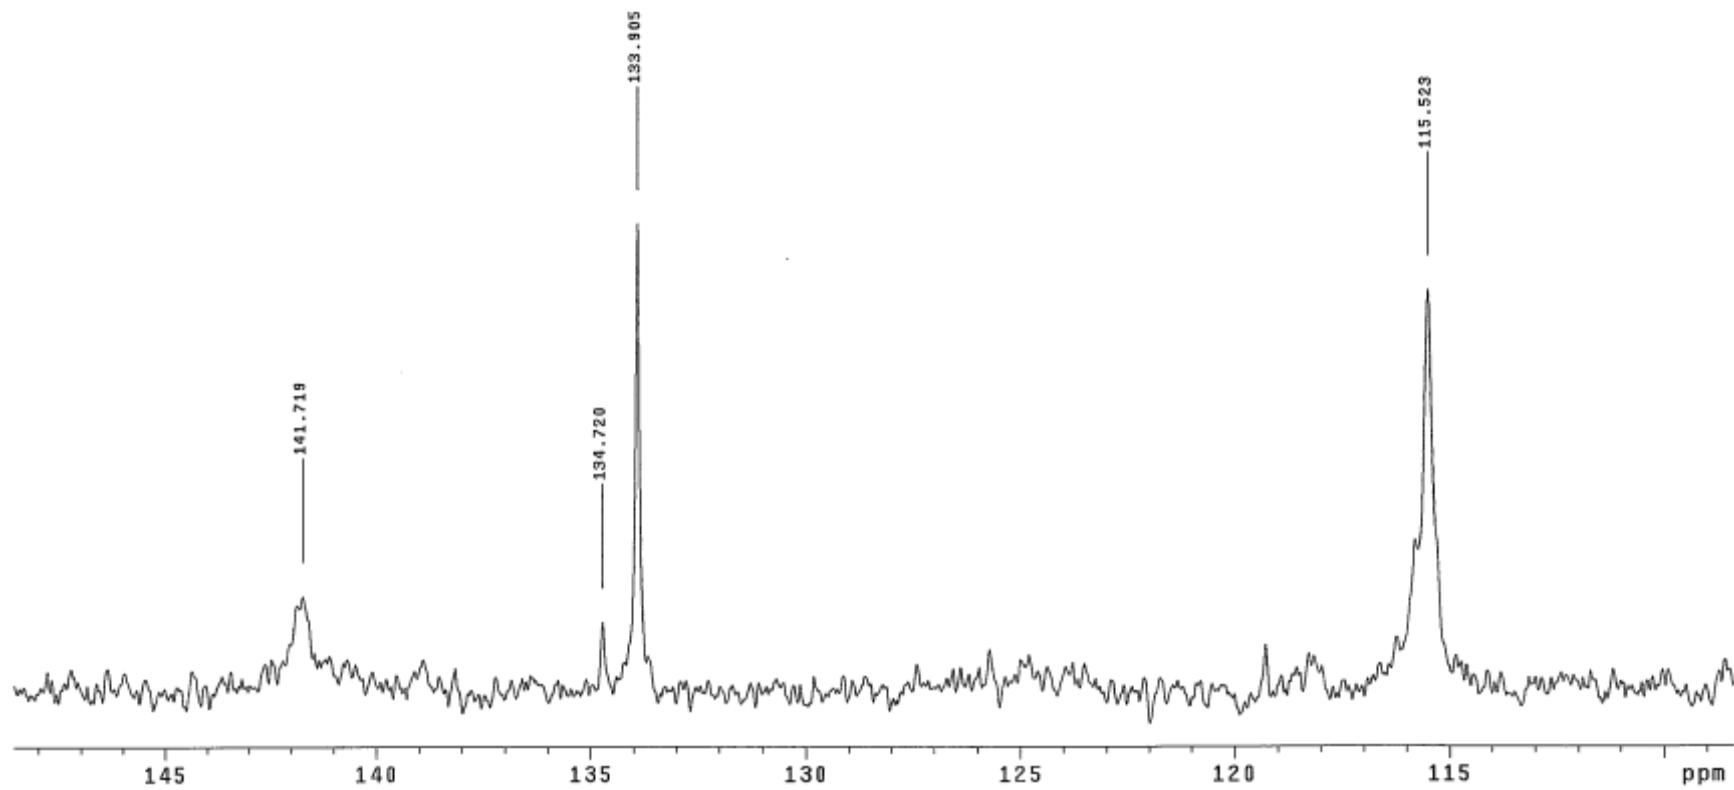

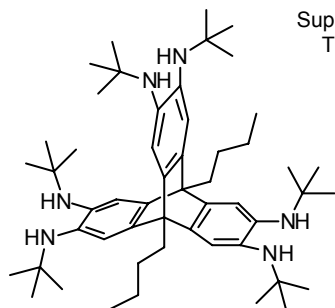

KAW8-53-2  
temp=50c

File: xp

Pulse Sequence: s2pu1

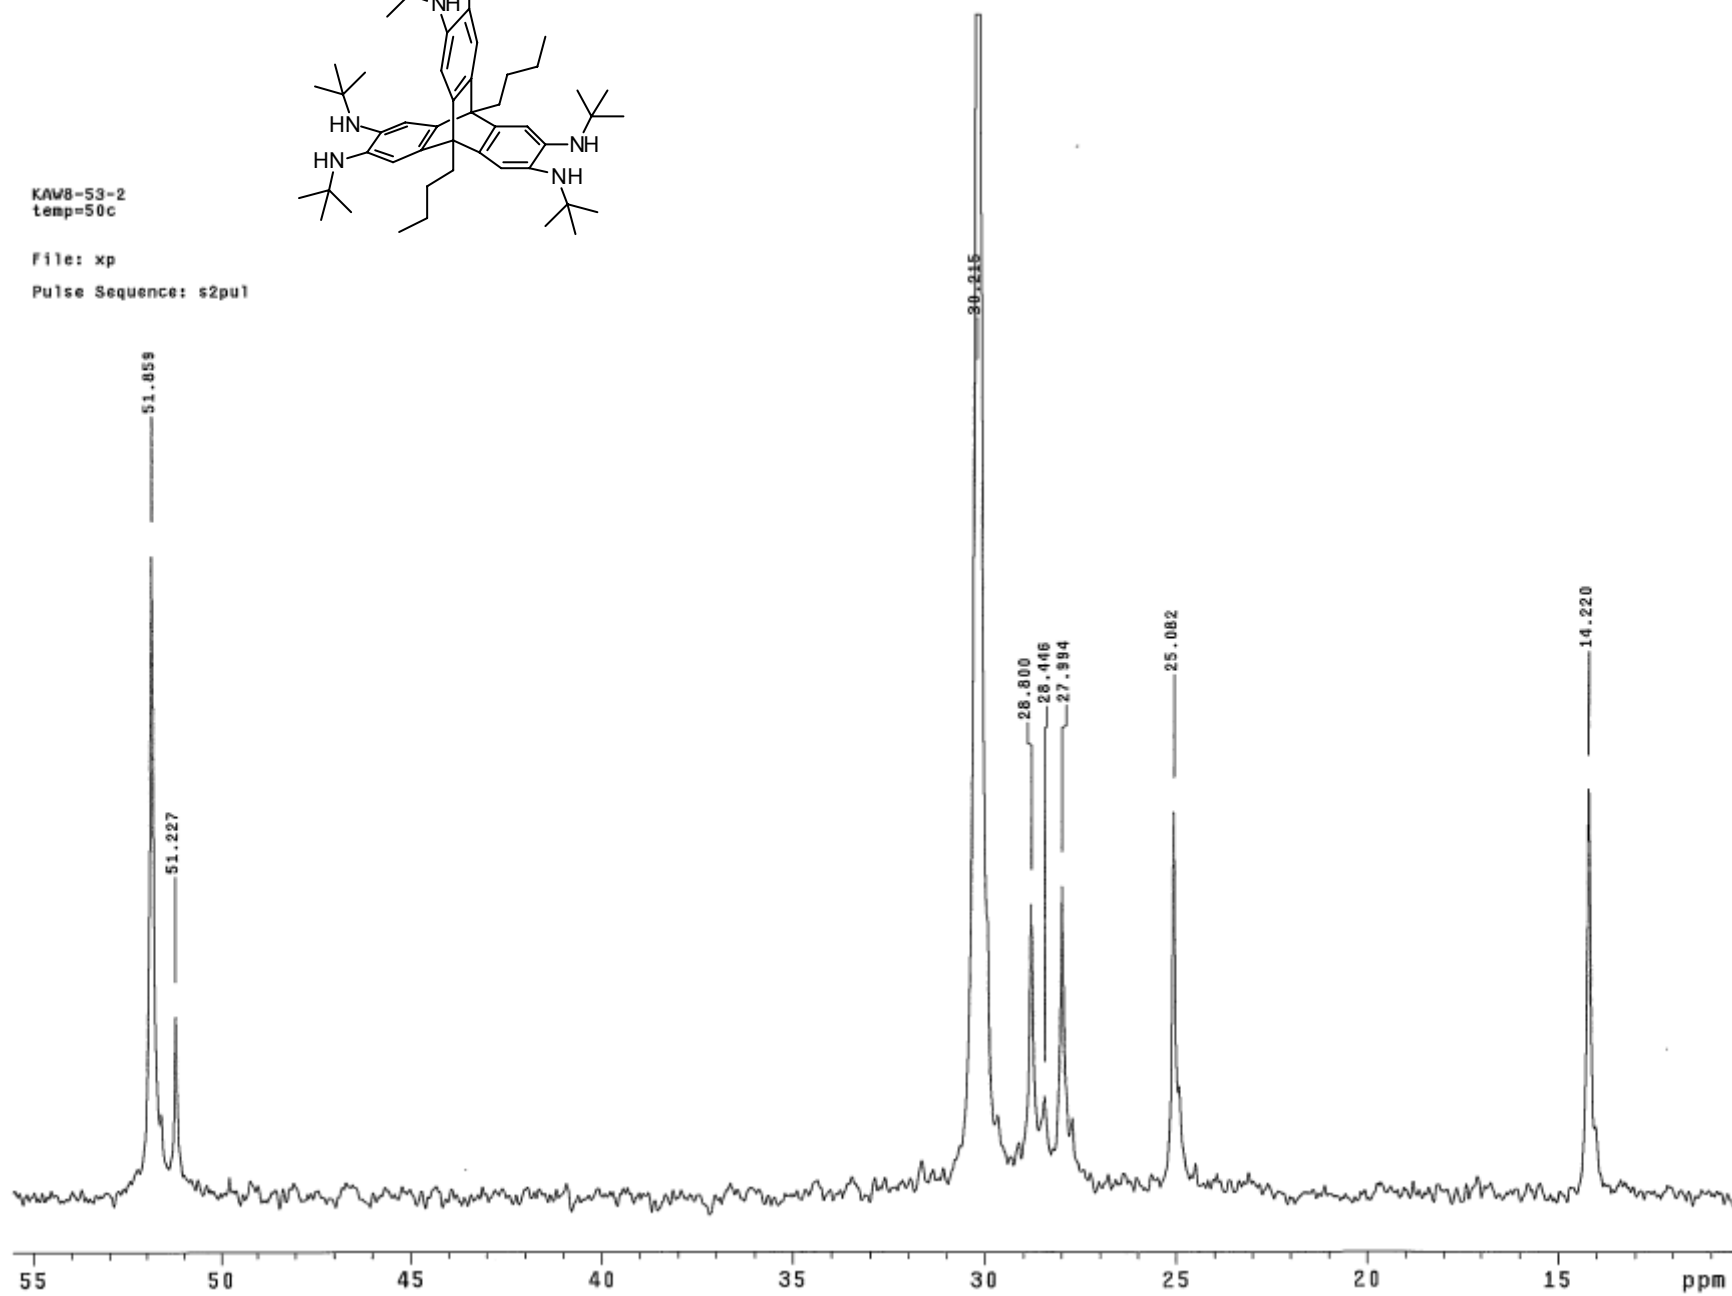

500 MHz nmr0

KAWB-128  
temp=120c

exp2 Proton

| SAMPLE      |             | SPECIAL    |        |
|-------------|-------------|------------|--------|
| date        | Sep 25 2009 | temp       | 120.0  |
| solvent     | dmsc        | gain       | 30     |
| file        | exp         | spin       | 20     |
| ACQUISITION |             | SPECIAL    |        |
| sw          | 7997.6      | hst        | 0.008  |
| at          | 4.001       | pw90       | 11.000 |
| np          | 64000       | alfa       | 6.500  |
| fb          | 4000        | FLAGS      |        |
| bs          | 32          | il         | n      |
| d1          | 2.000       | in         | n      |
| nt          | 64          | dp         | y      |
| ct          | 64          | hs         | nn     |
| TRANSMITTER |             | PROCESSING |        |
| tn          | H1          | lb         | 0.10   |
| sfrq        | 499.870     | fn         | 262144 |
| tof         | 499.8       | DISPLAY    |        |
| tpwr        | 57          | sp         | -249.9 |
| pw          | 1.833       | vp         | 6248.3 |
| DECOUPLER   |             | rfl        | 2239.8 |
| dn          | C13         | rfp        | 1244.7 |
| dof         | 0           | rp         | -271.1 |
| dm          | nnn         | lp         | -8.0   |
| dmm         | c           | PLOT       |        |
| dpwr        | 40          | wc         | 250    |
| dmf         | 14285       | sc         | 0      |
|             |             | vs         | 91     |
|             |             | th         | 6      |
|             |             | ai         | cdc ph |

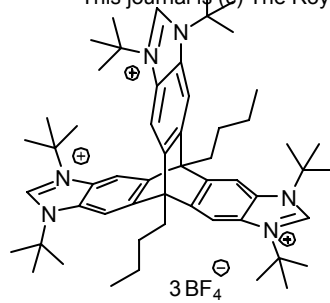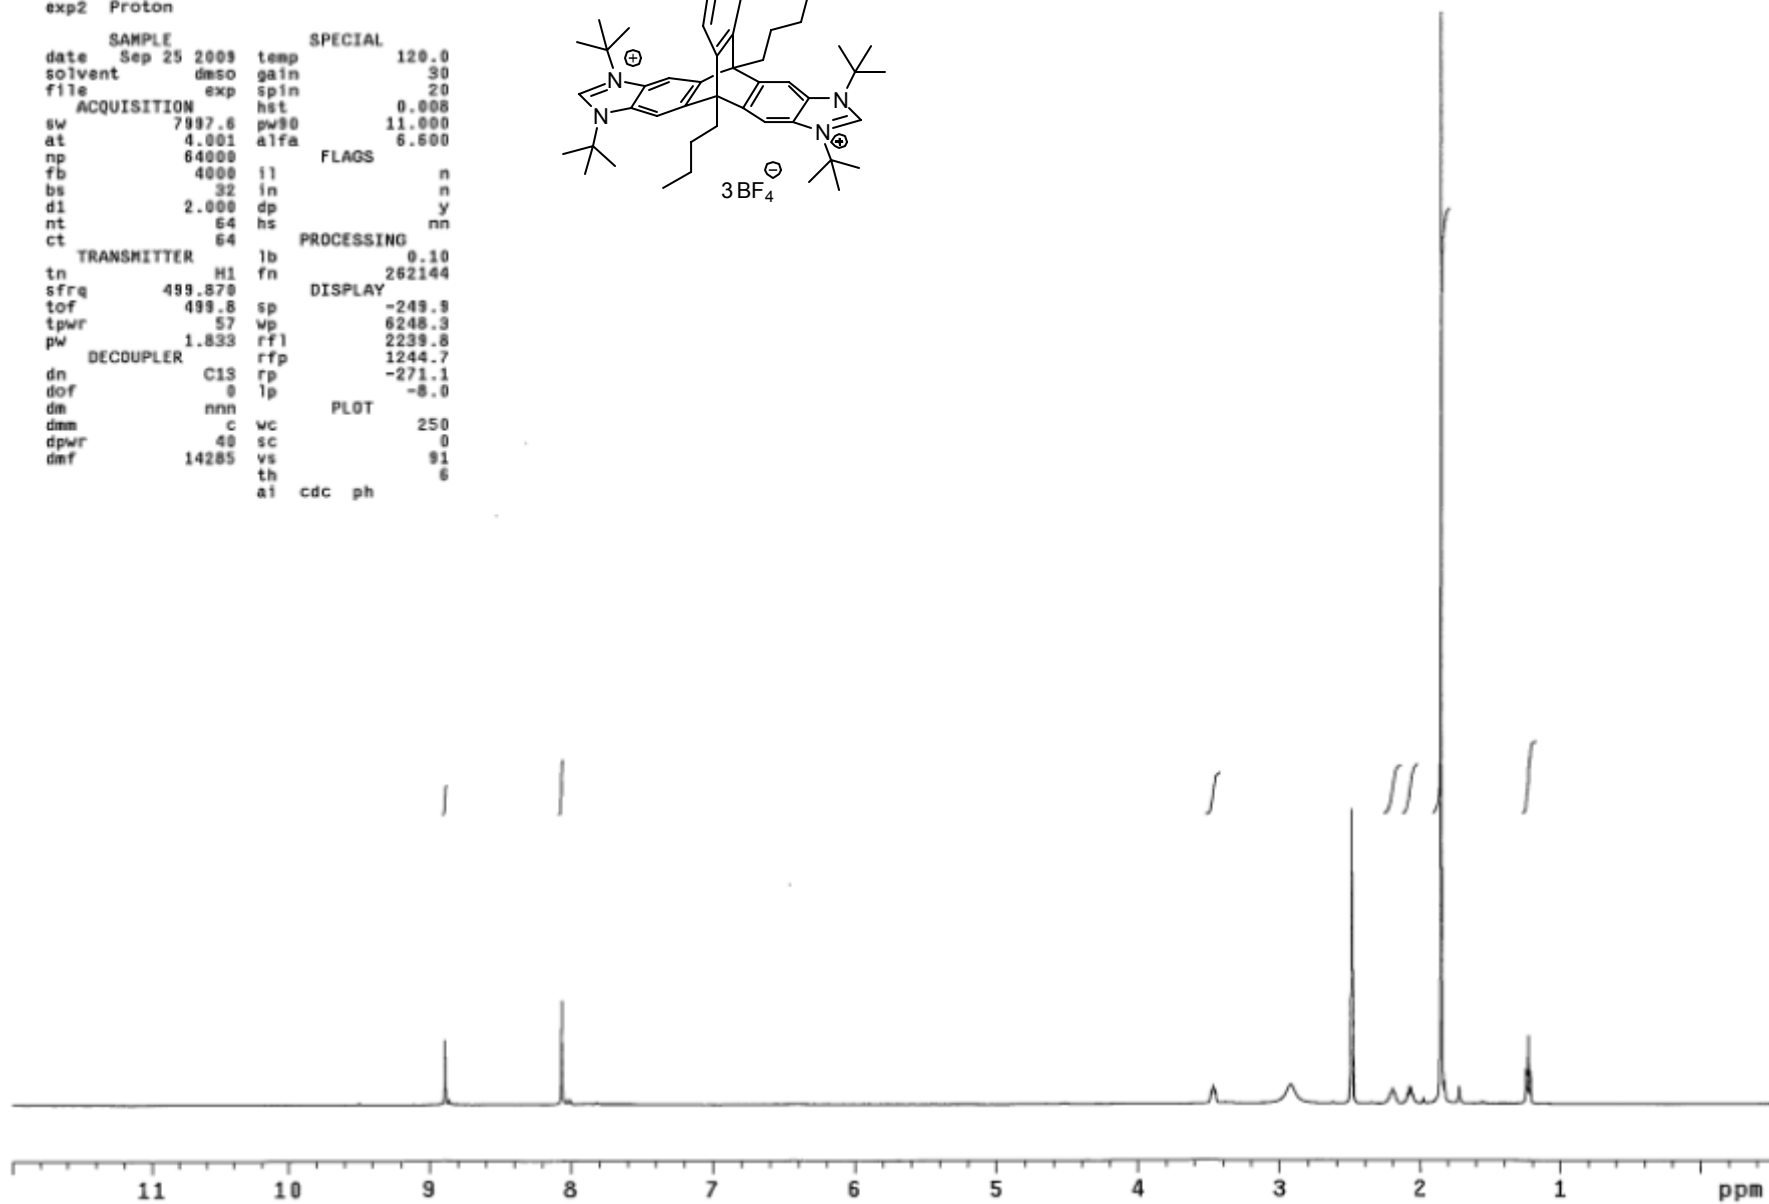



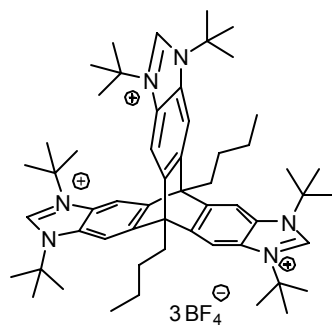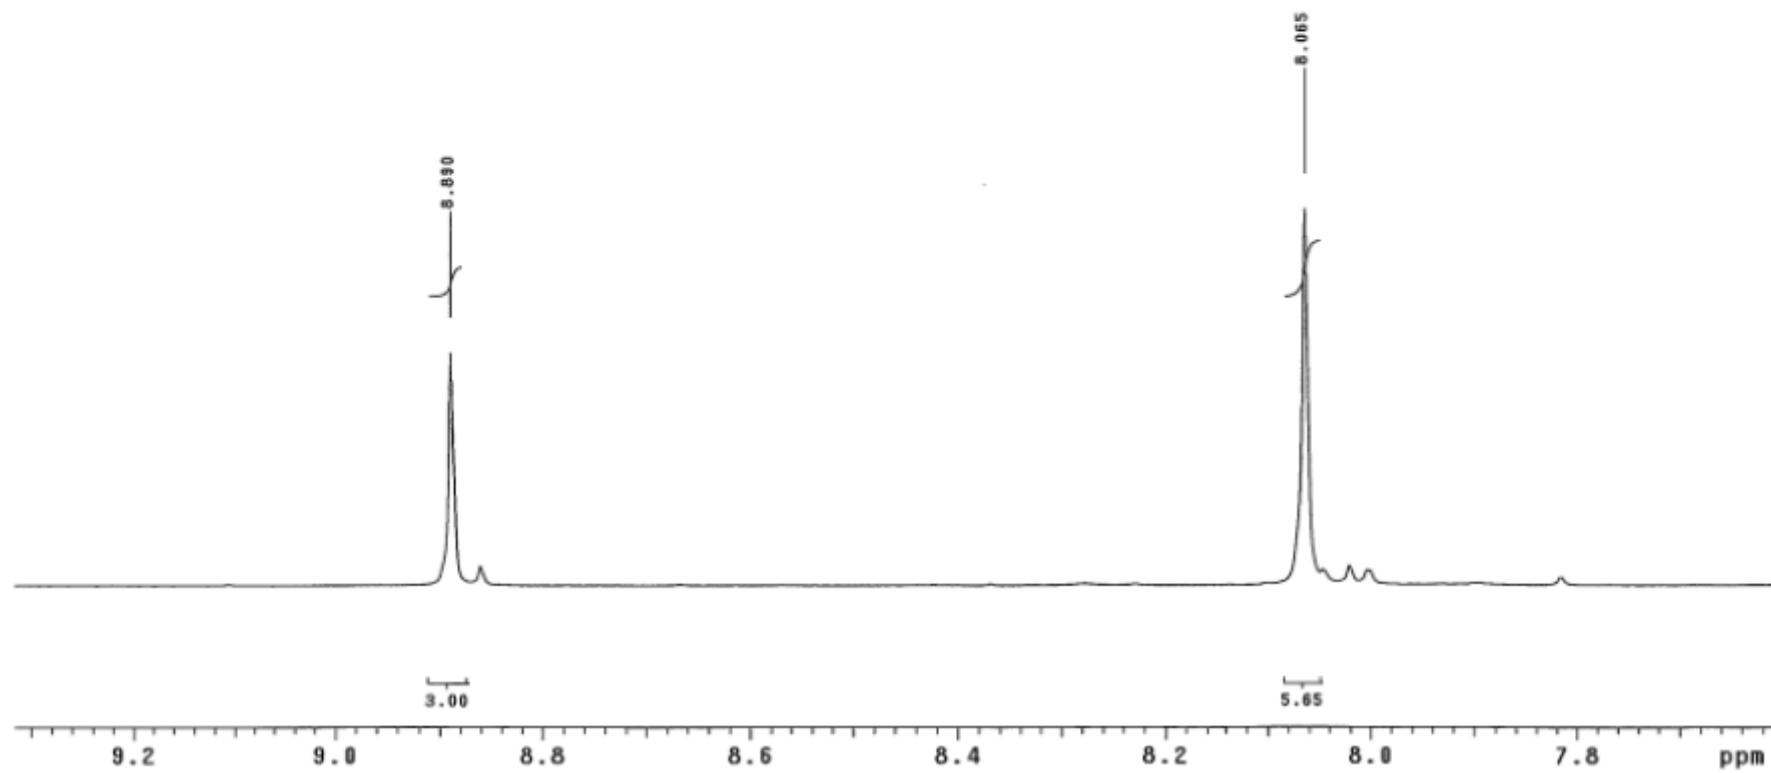

KAW8-128  
temp=120c  
File: Proton  
Pulse Sequence: s2pu1

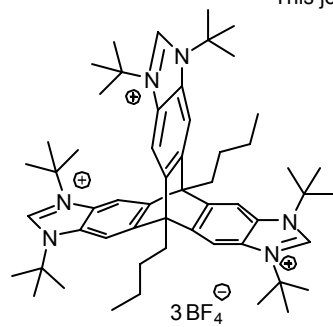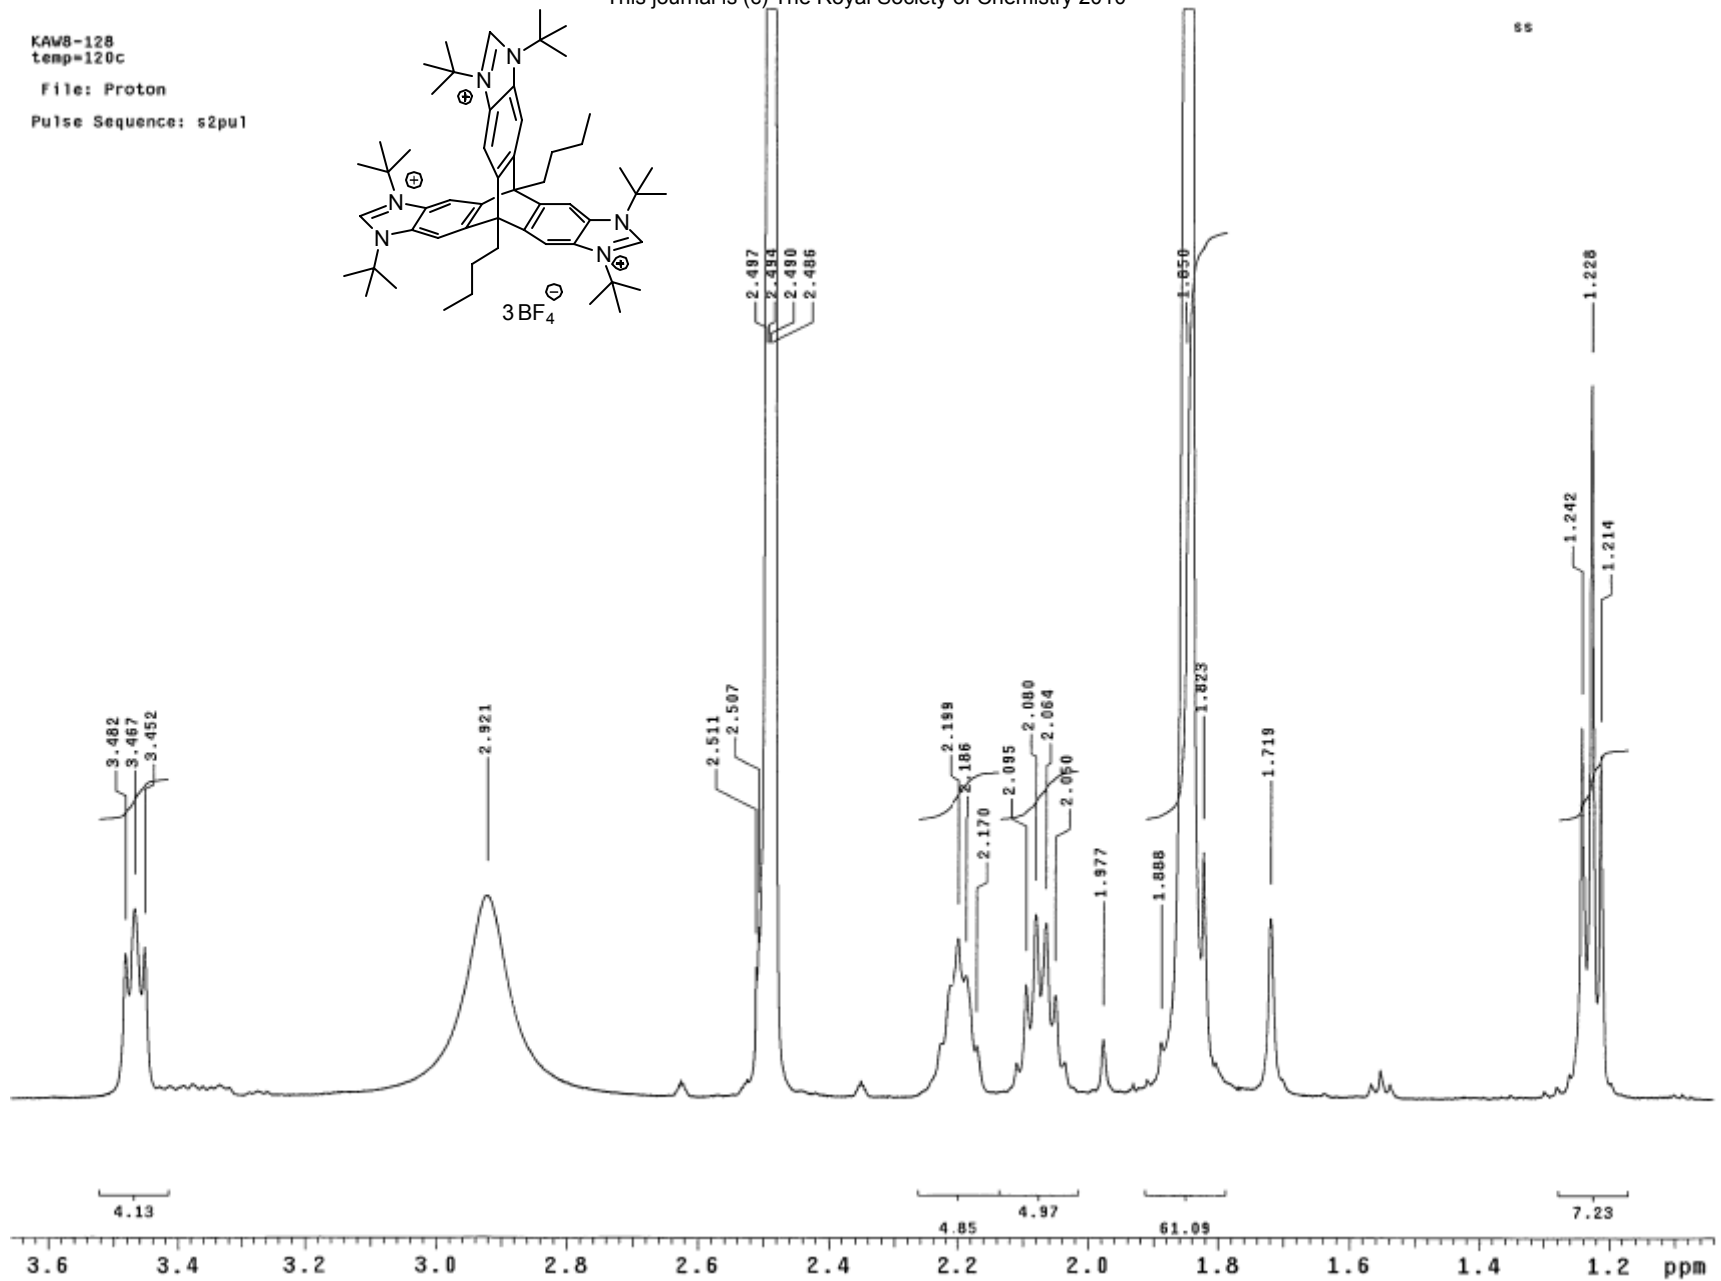

500 MHz nmr0

KAWB-128  
temp=120c

exp4 Carbon

|             |             |            |          |
|-------------|-------------|------------|----------|
| SAMPLE      |             | SPECIAL    |          |
| date        | Sep 25 2009 | temp       | 120.0    |
| solvent     | dms0        | gain       | 50       |
| file        | exp         | spin       | 20       |
| ACQUISITION |             | hst        | 0.008    |
| sw          | 32679.7     | pw90       | 9.500    |
| at          | 1.958       | alfa       | 10.000   |
| np          | 128000      | FLAGS      |          |
| fb          | 18000       | il         | n        |
| bs          | 16          | in         | n        |
| d1          | 2.000       | dp         | y        |
| nt          | 2000        | hs         | nn       |
| ct          | 2000        | PROCESSING |          |
| TRANSMITTER |             | lb         | 2.00     |
| tn          | C13         | fn         | not used |
| sfrq        | 125.705     | DISPLAY    |          |
| tof         | 1883.9      | sp         | -628.6   |
| tpwr        | 53          | wp         | 25766.4  |
| pw          | 3.163       | rfl        | 7646.3   |
| DECOUPLER   |             | rfl        | 4964.8   |
| dn          | H1          | rp         | 161.9    |
| dof         | 0           | lp         | -198.8   |
| dn          | yyy         | PLOT       |          |
| dnn         | w           | wc         | 250      |
| dpwr        | 37          | sc         | 0        |
| dmf         | 10582       | vs         | 6169     |
|             |             | th         | 5        |
|             |             | ai         | cdc ph   |

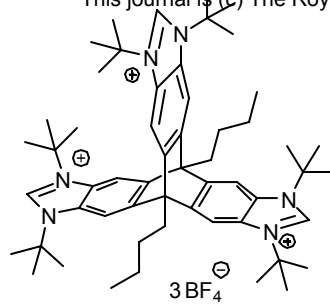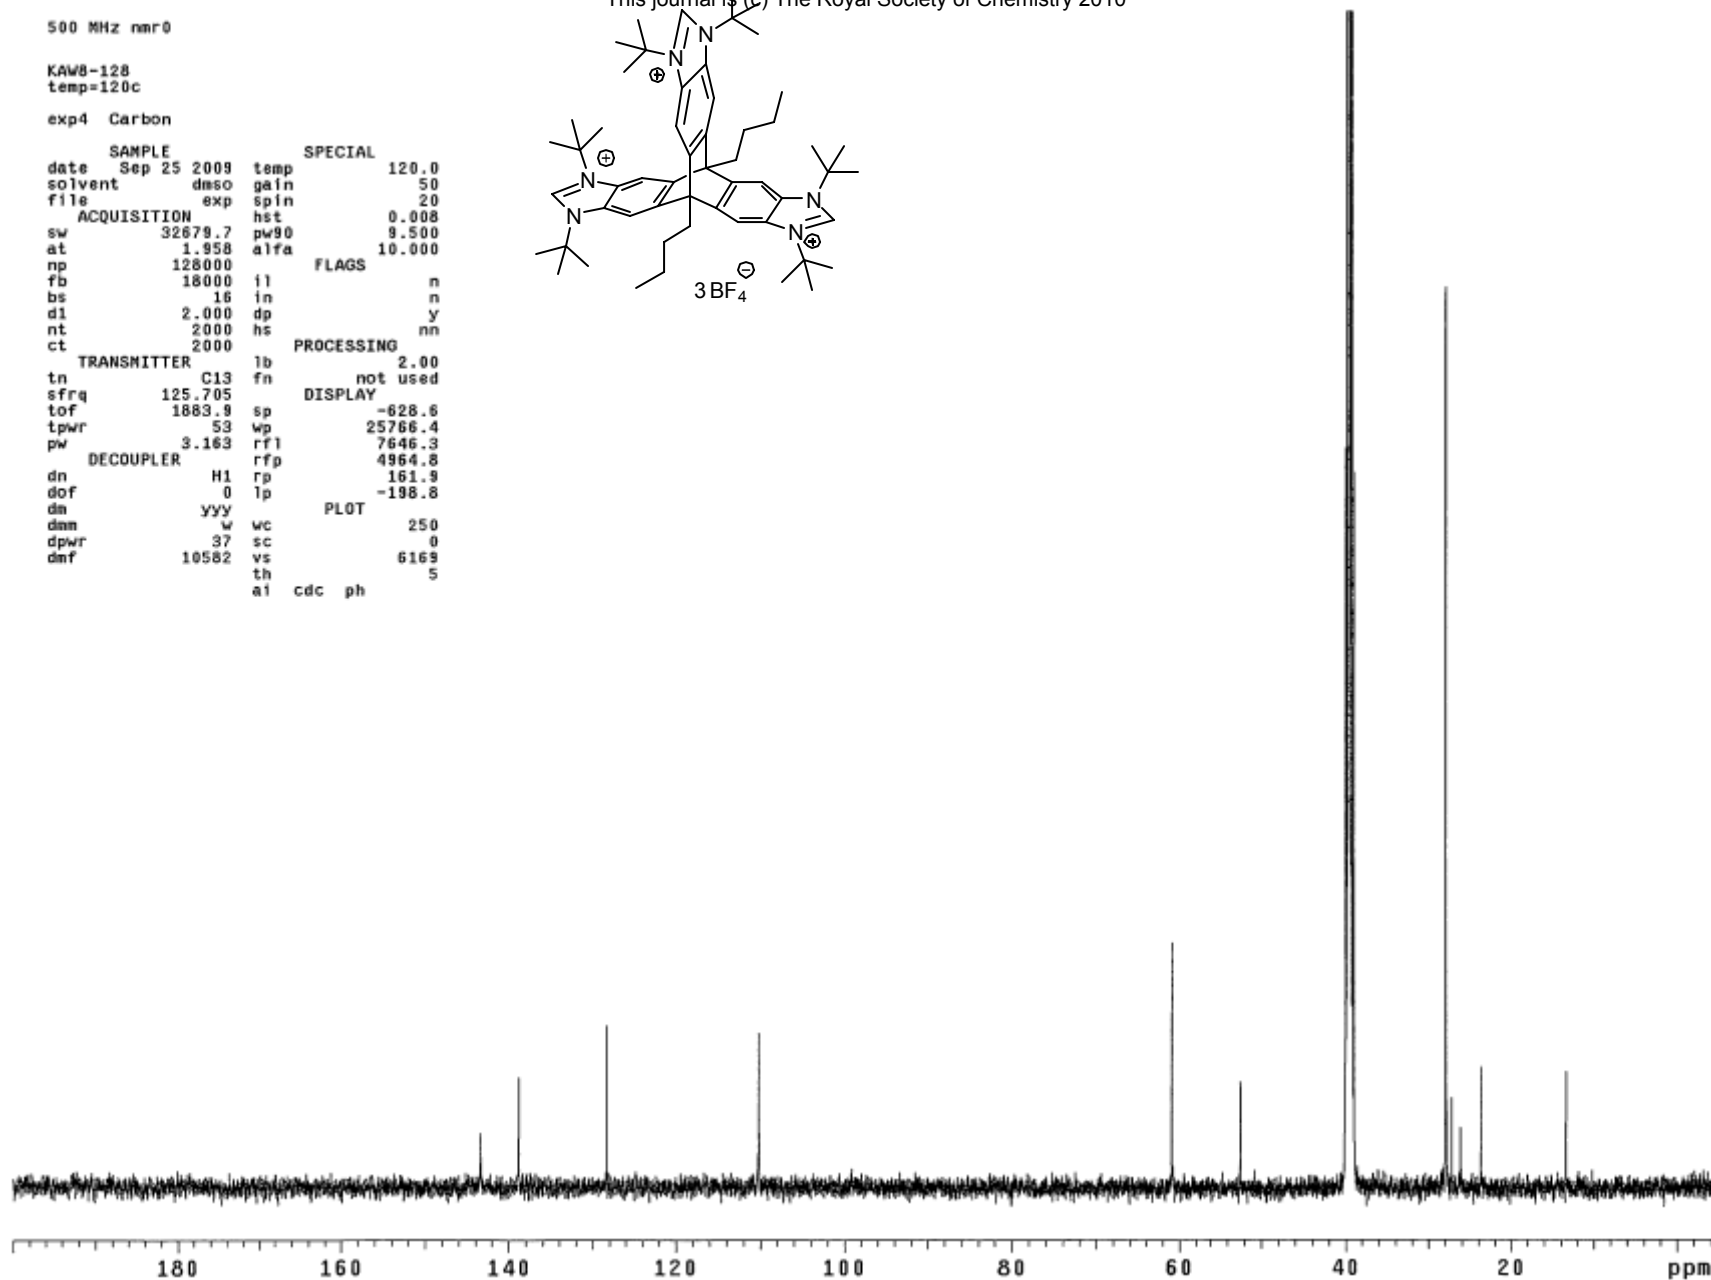

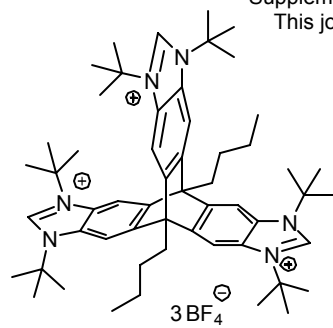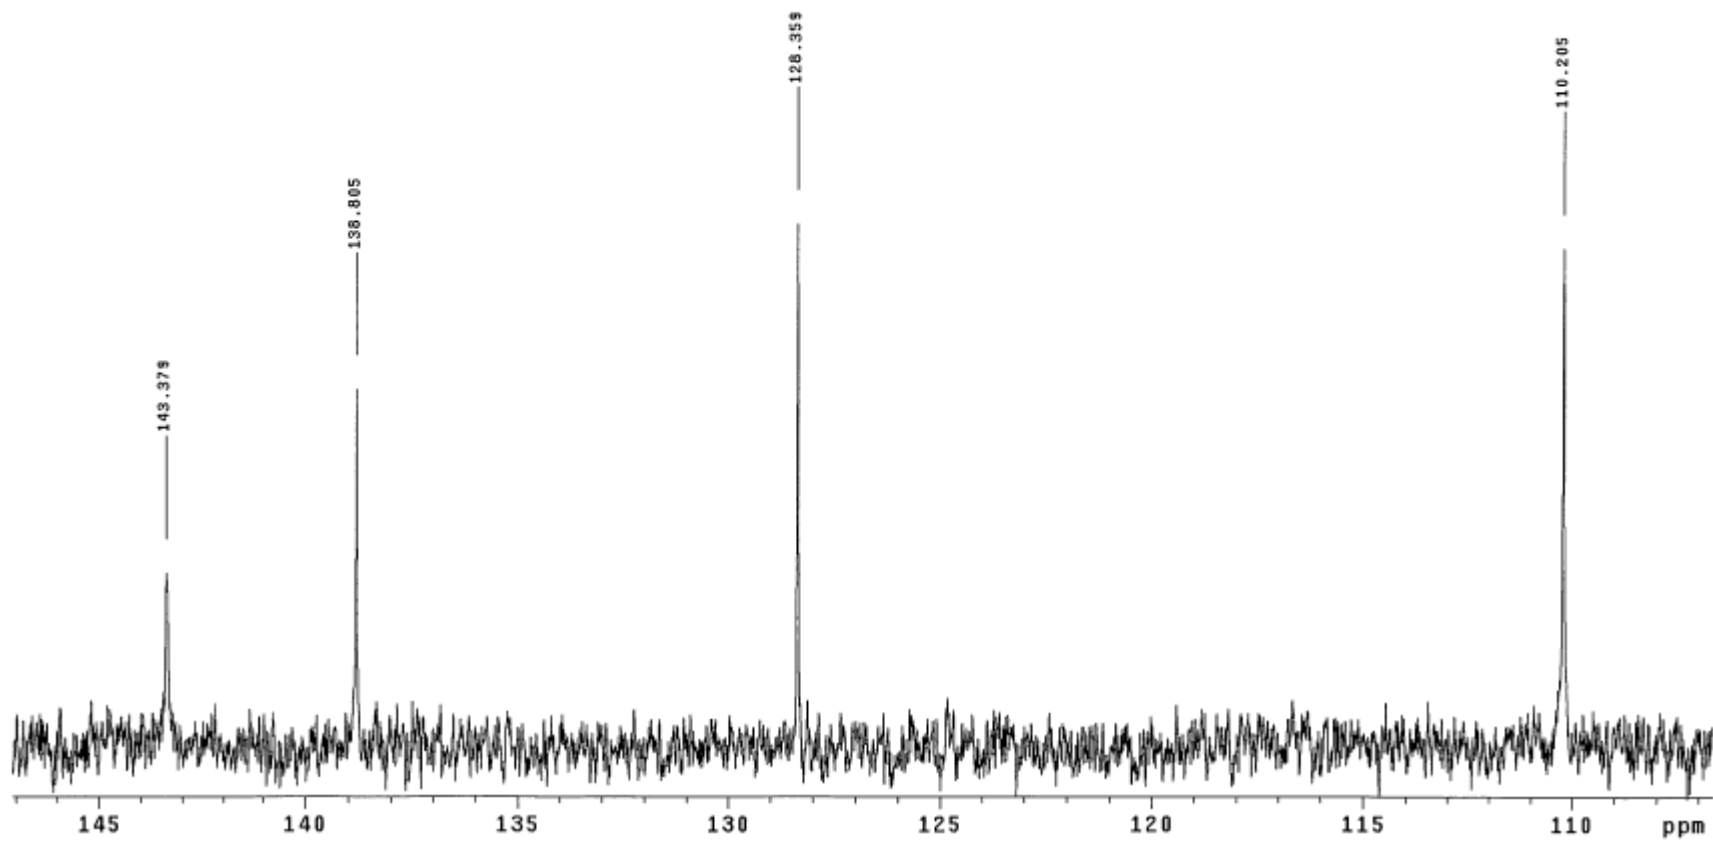

KAWB-128  
temp=120c  
File: Carbon  
Pulse Sequence: s2pu1

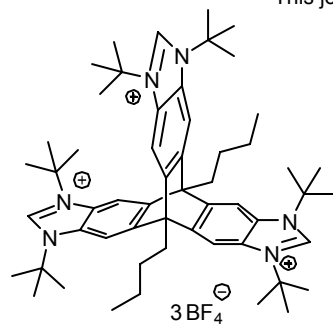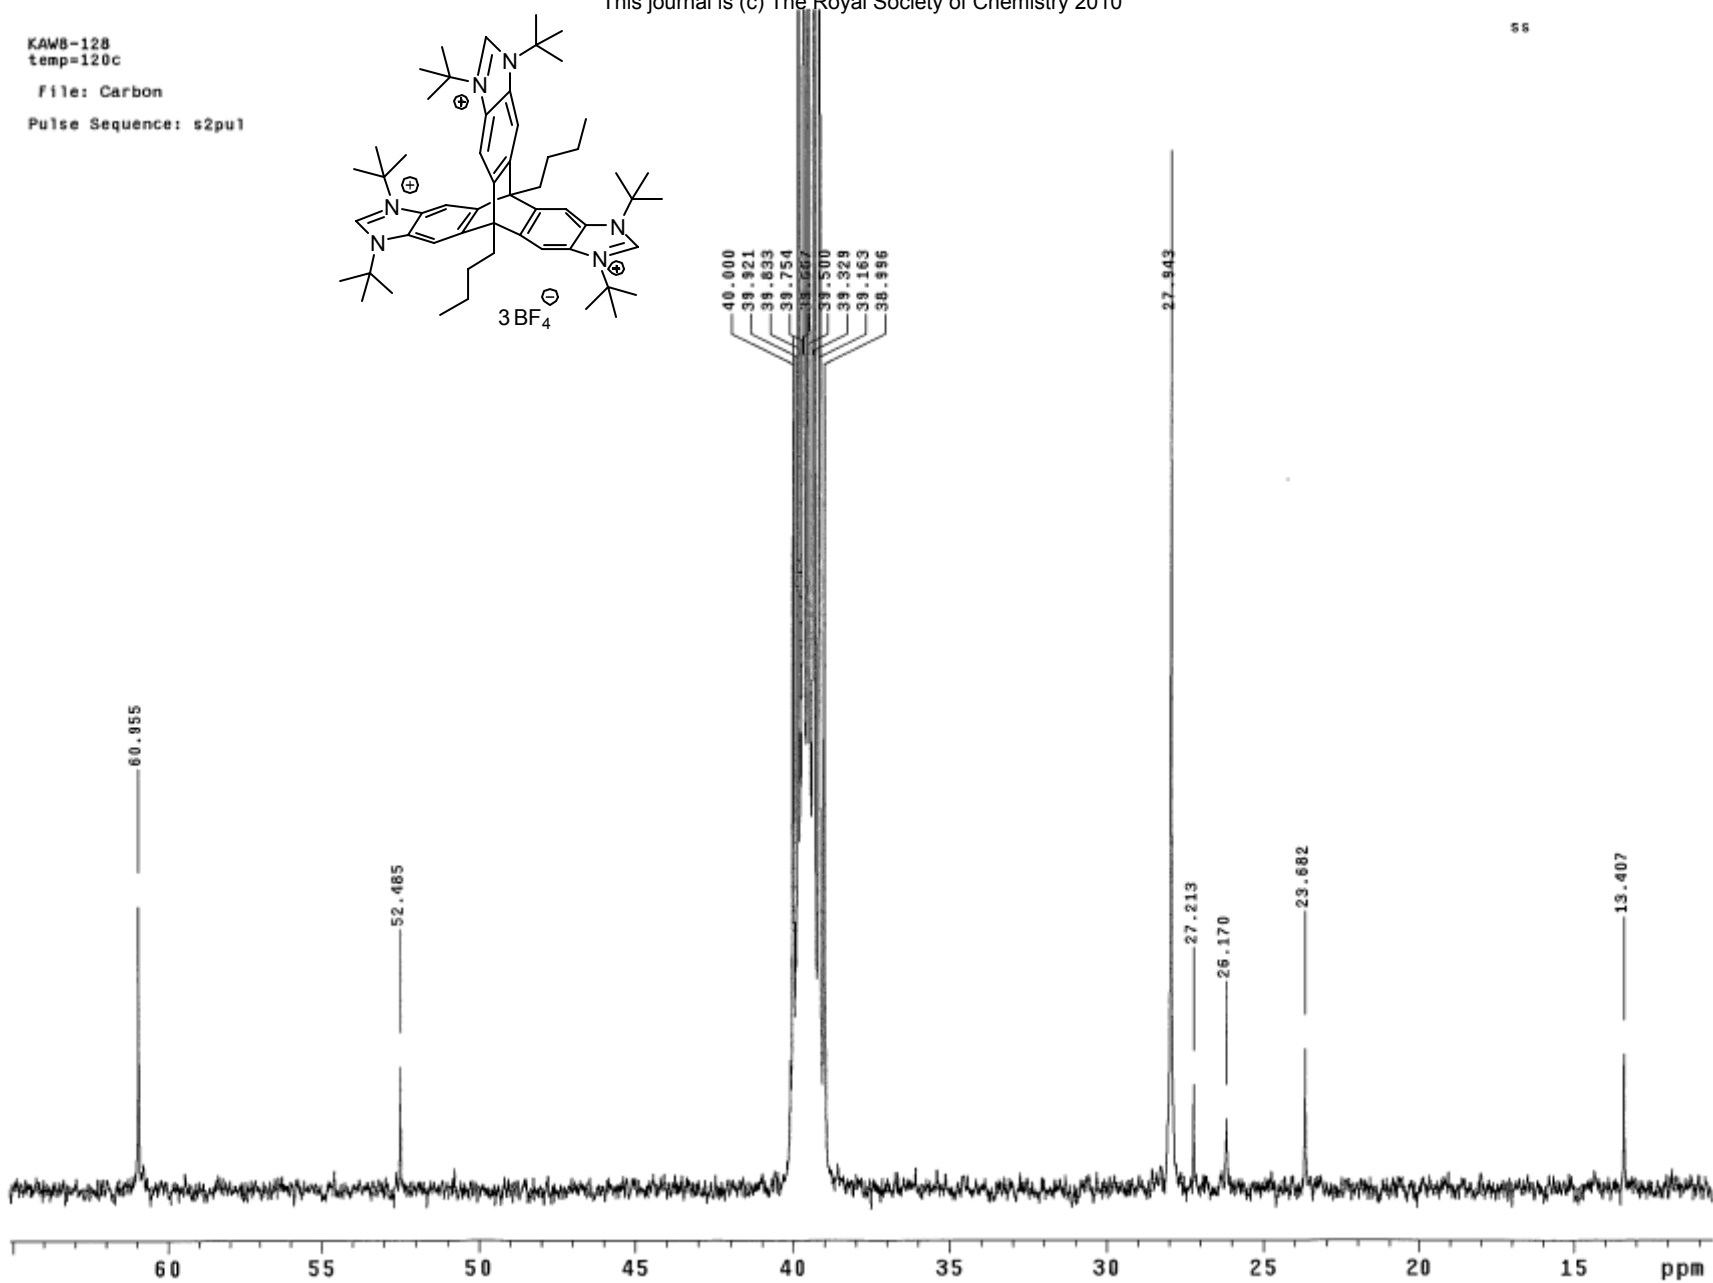

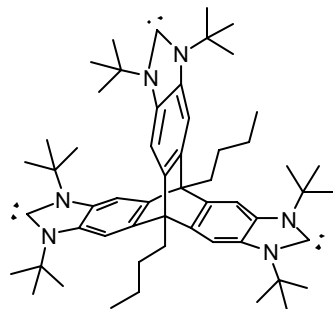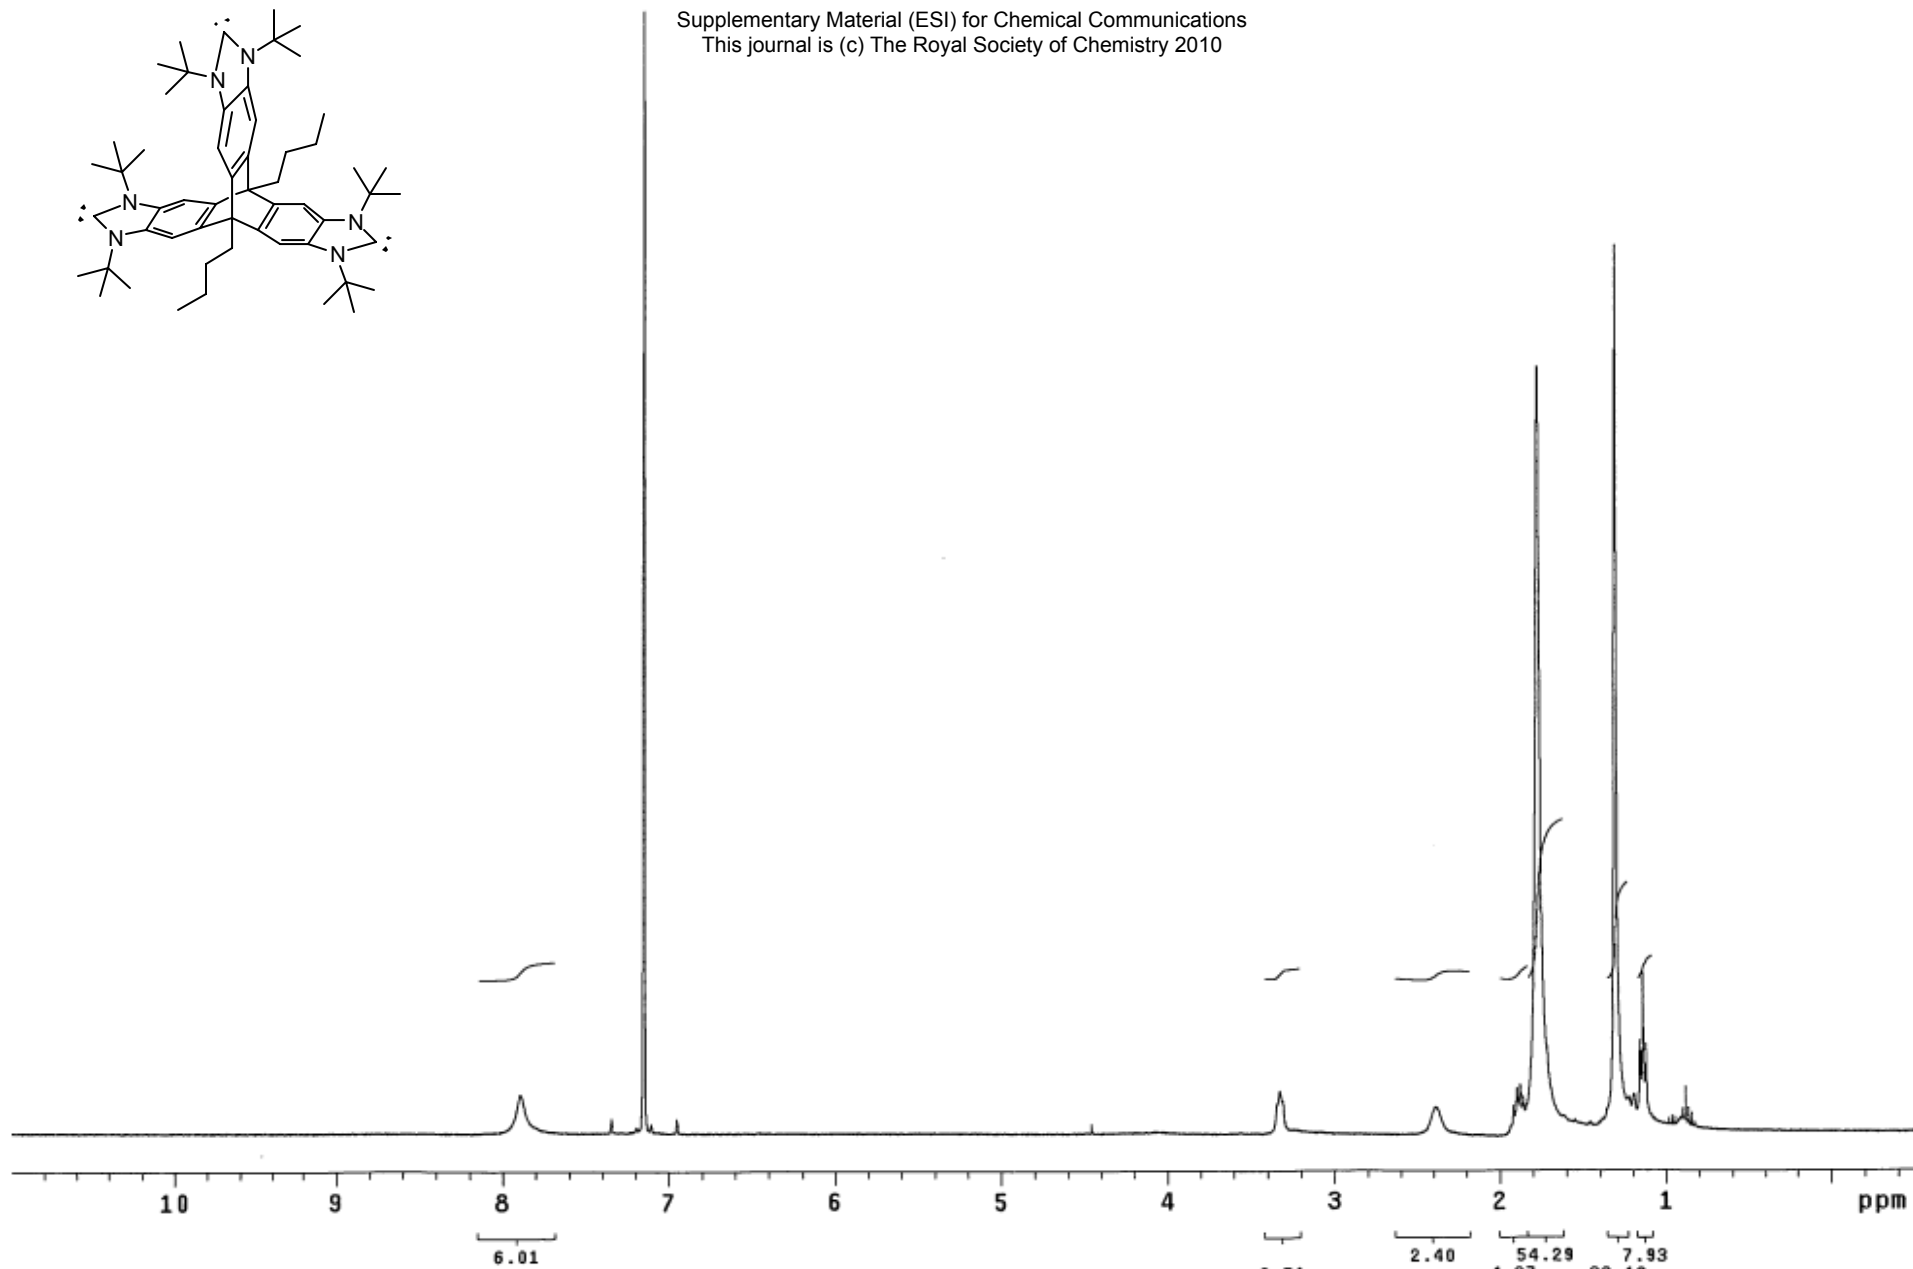

|                                                                                                                                   |                                |                                                                                           |                                                                                                                                   |
|-----------------------------------------------------------------------------------------------------------------------------------|--------------------------------|-------------------------------------------------------------------------------------------|-----------------------------------------------------------------------------------------------------------------------------------|
| <b>PULSE SEQUENCE</b><br>Relax. delay 2.000 sec<br>Pulse 16.4 degrees<br>Acq. time 2.856 sec<br>Width 5602.2 Hz<br>60 repetitions | <b>OBSERVE</b> H1, 400.2670009 | <b>DATA PROCESSING</b><br>Line broadening 0.1 Hz<br>FT size 32768<br>Total time 4 minutes | <b>KAW8-47</b><br>C6D6<br>7-6-09<br><b>Pulse Sequence: s2pu1</b><br>Solvent: Benzene<br>Ambient temperature<br>Mercury-400 "nmr6" |
|-----------------------------------------------------------------------------------------------------------------------------------|--------------------------------|-------------------------------------------------------------------------------------------|-----------------------------------------------------------------------------------------------------------------------------------|

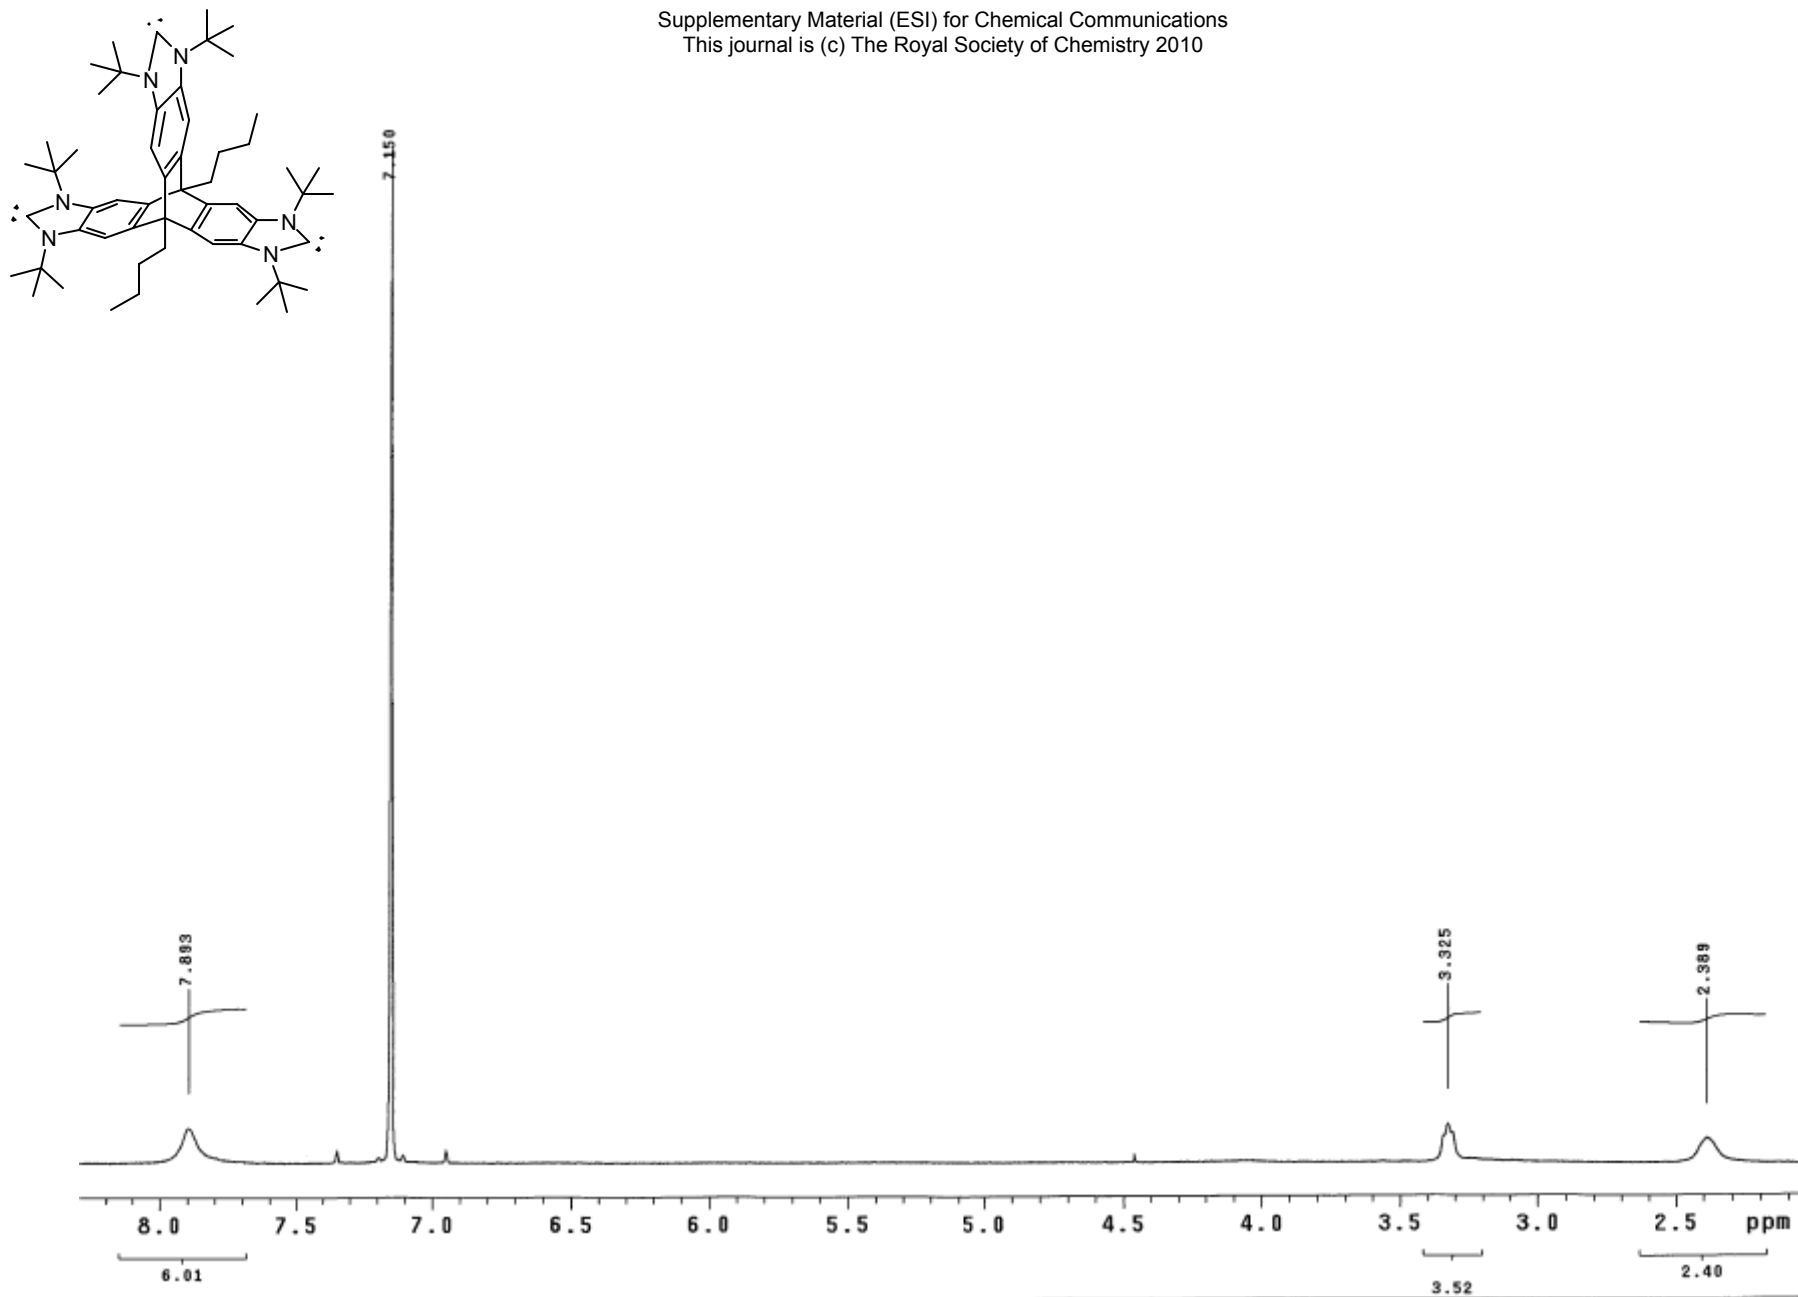

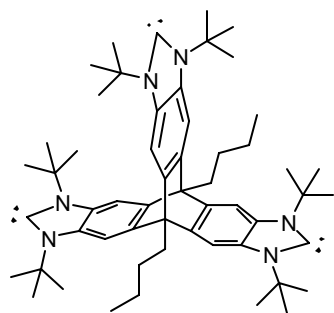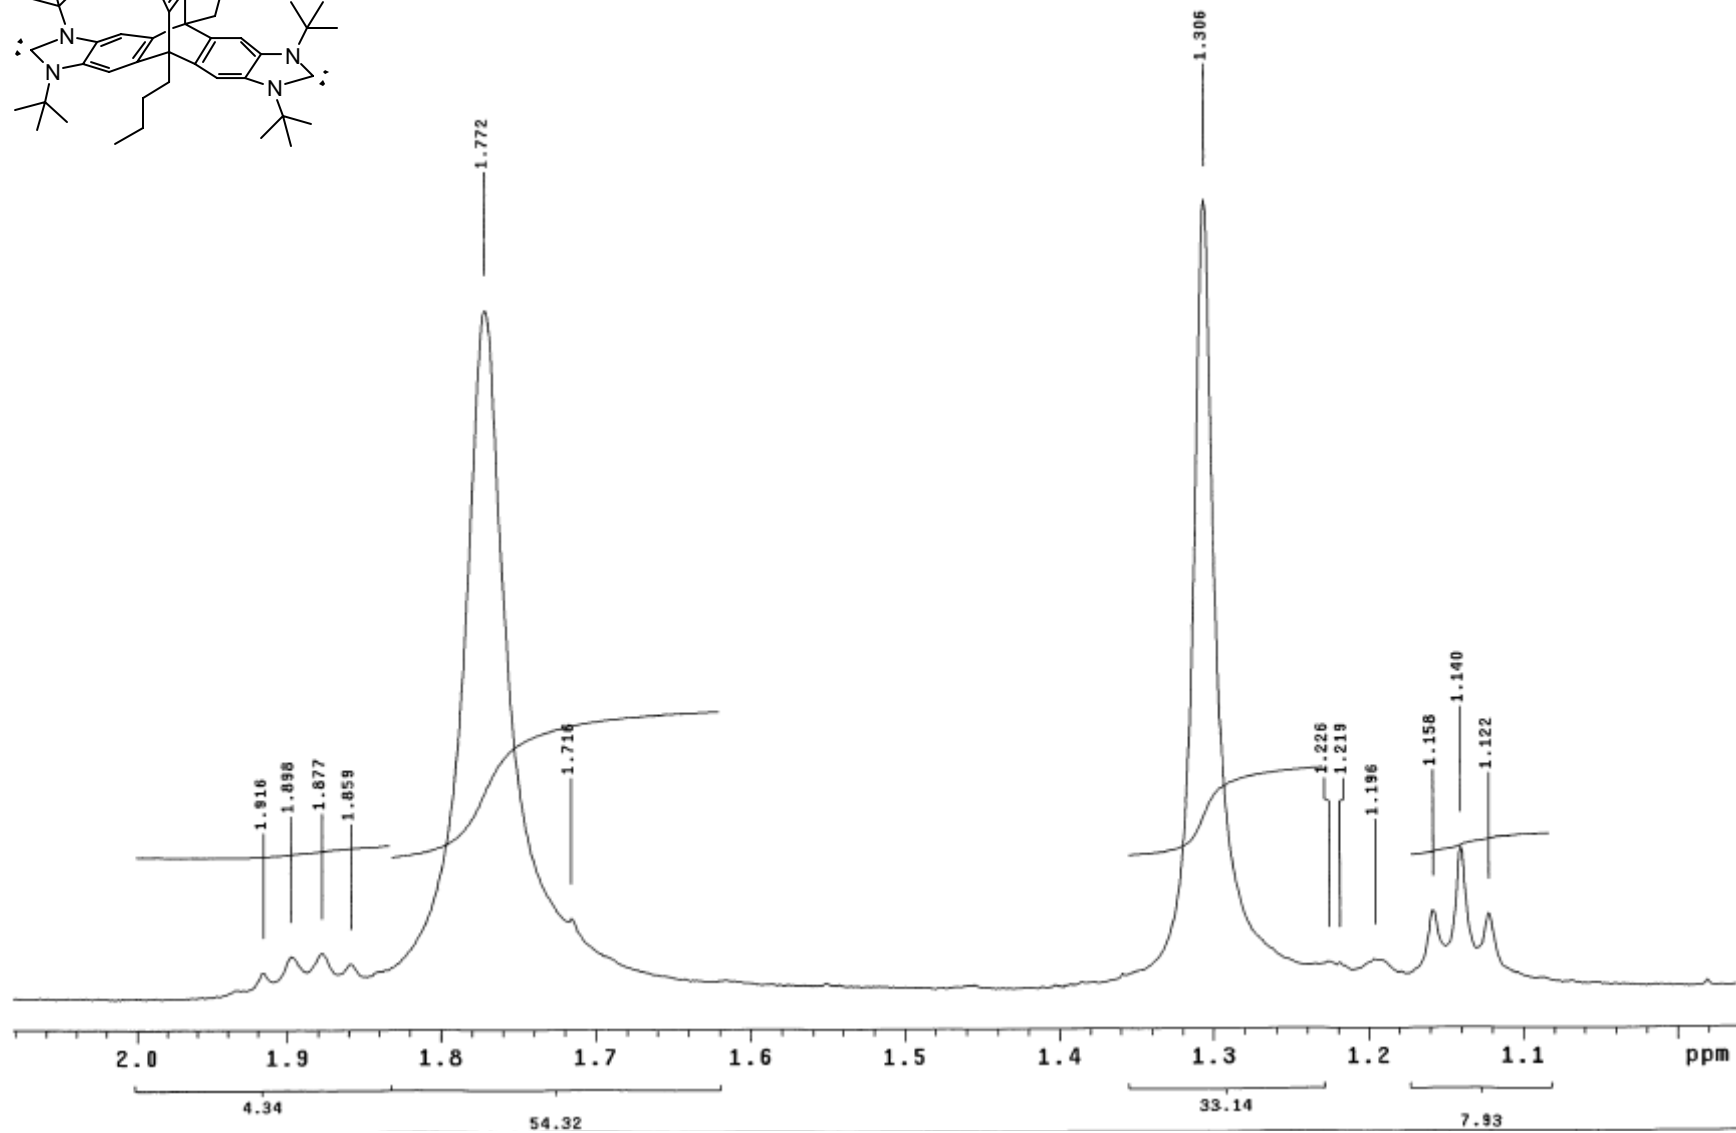



500 MHz nmr0

KAW8-117  
temp=60c

exp4 Carbon

| SAMPLE      |            | SPECIAL    |          |
|-------------|------------|------------|----------|
| date        | Sep 8 2009 | temp       | 60.0     |
| solvent     | c6d6       | gain       | 50       |
| file        | exp        | spin       | 20       |
| ACQUISITION |            | SPECIAL    |          |
| sw          | 33305.6    | hst        | 0.008    |
| at          | 1.358      | pw90       | 9.500    |
| np          | 130452     | alfa       | 10.000   |
| fb          | 18000      | FLAGS      |          |
| bs          | 16         | l1         | n        |
| d1          | 2.000      | in         | n        |
| nt          | 20000      | dp         | y        |
| ct          | 3043       | hs         | nn       |
| TRANSMITTER |            | PROCESSING |          |
| tn          | C13        | lb         | 5.00     |
| sfrq        | 125.766    | fn         | not used |
| DECOUPLER   |            | DISPLAY    |          |
| dn          | H1         | sp         | -628.9   |
| dof         | 0          | wp         | 30794.0  |
| dm          | yyy        | rfl        | 17947.2  |
| dms         | w          | rfp        | 16088.4  |
| dpwr        | 37         | rp         | 170.7    |
| dnf         | 10582      | lp         | -225.6   |
|             |            | PLOT       |          |
|             |            | wc         | 250      |
|             |            | sc         | 0        |
|             |            | vs         | 12495    |
|             |            | th         | 3        |
|             |            | ai         | ph       |

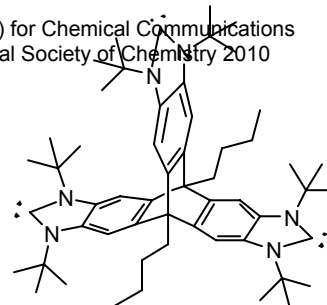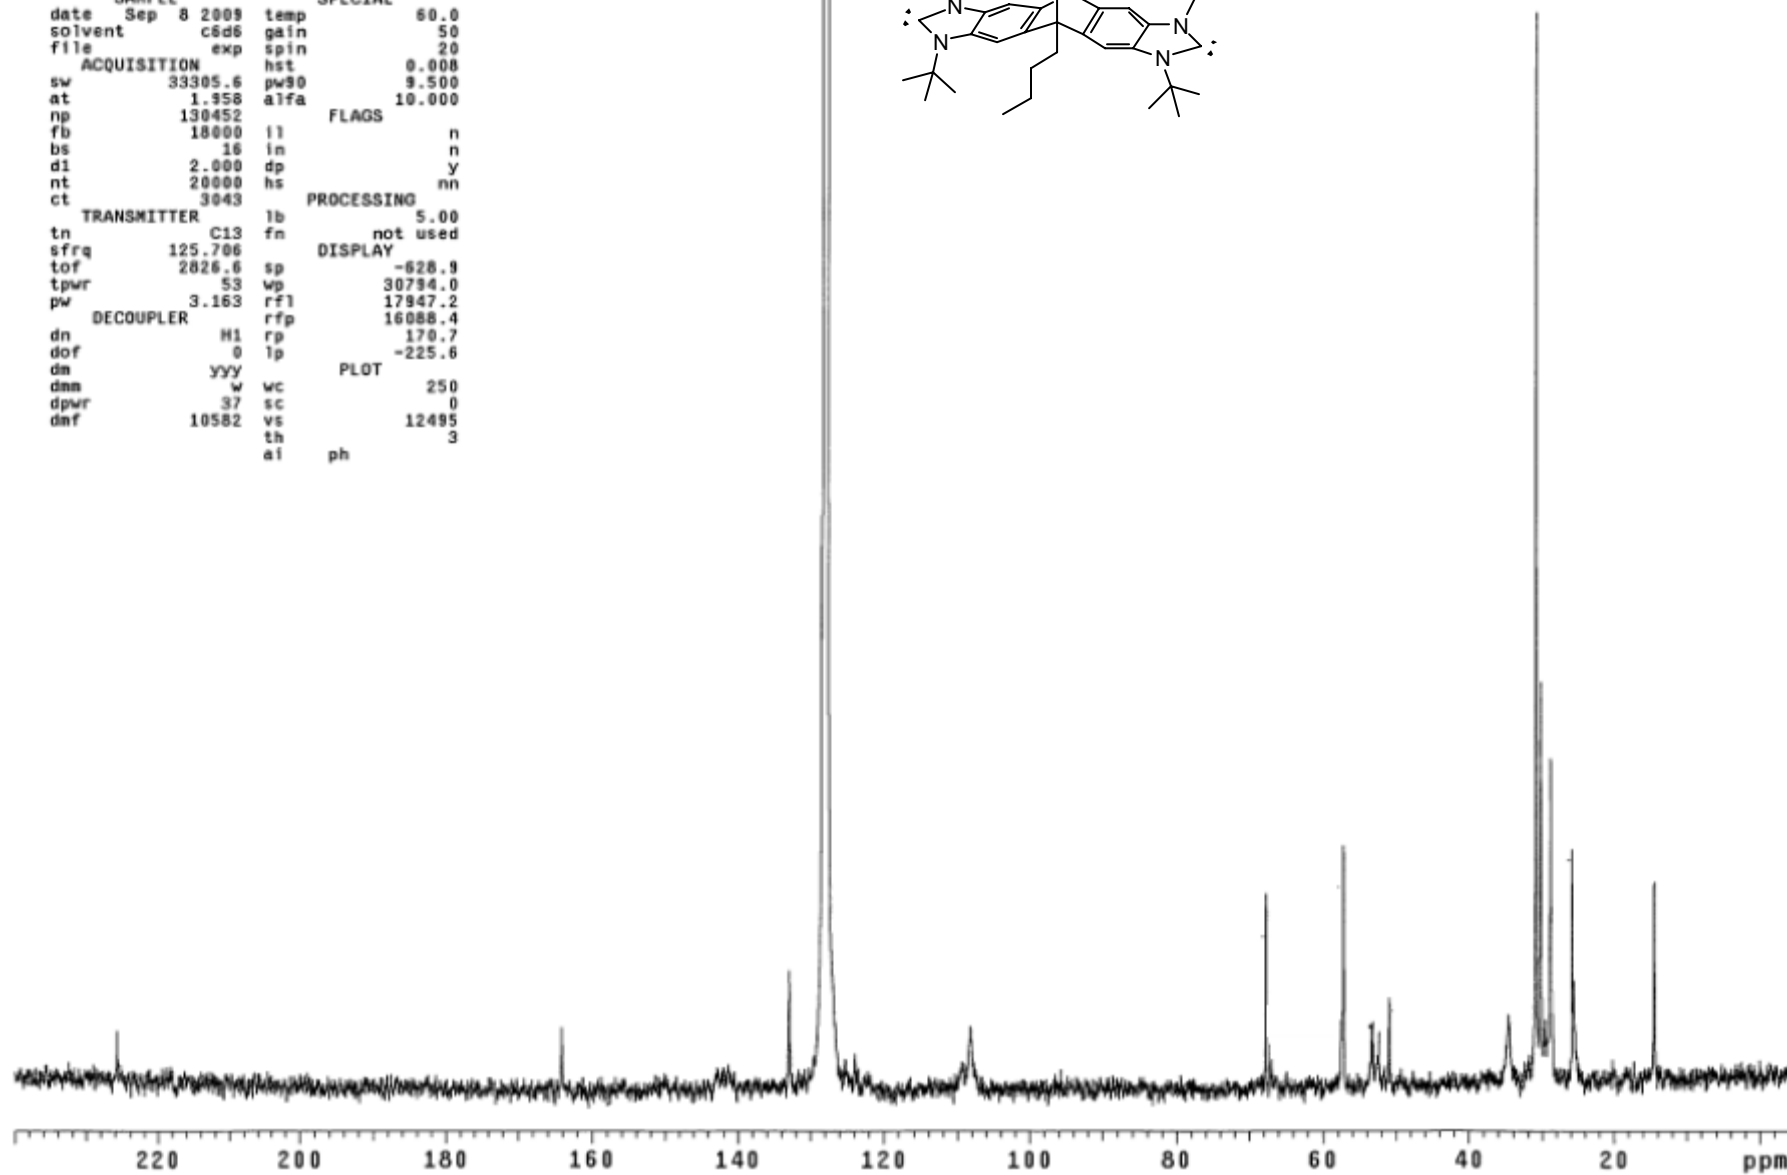

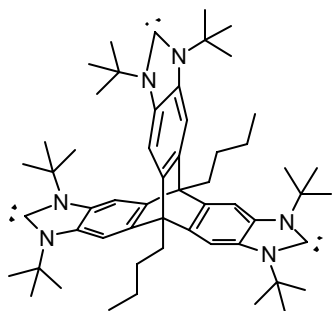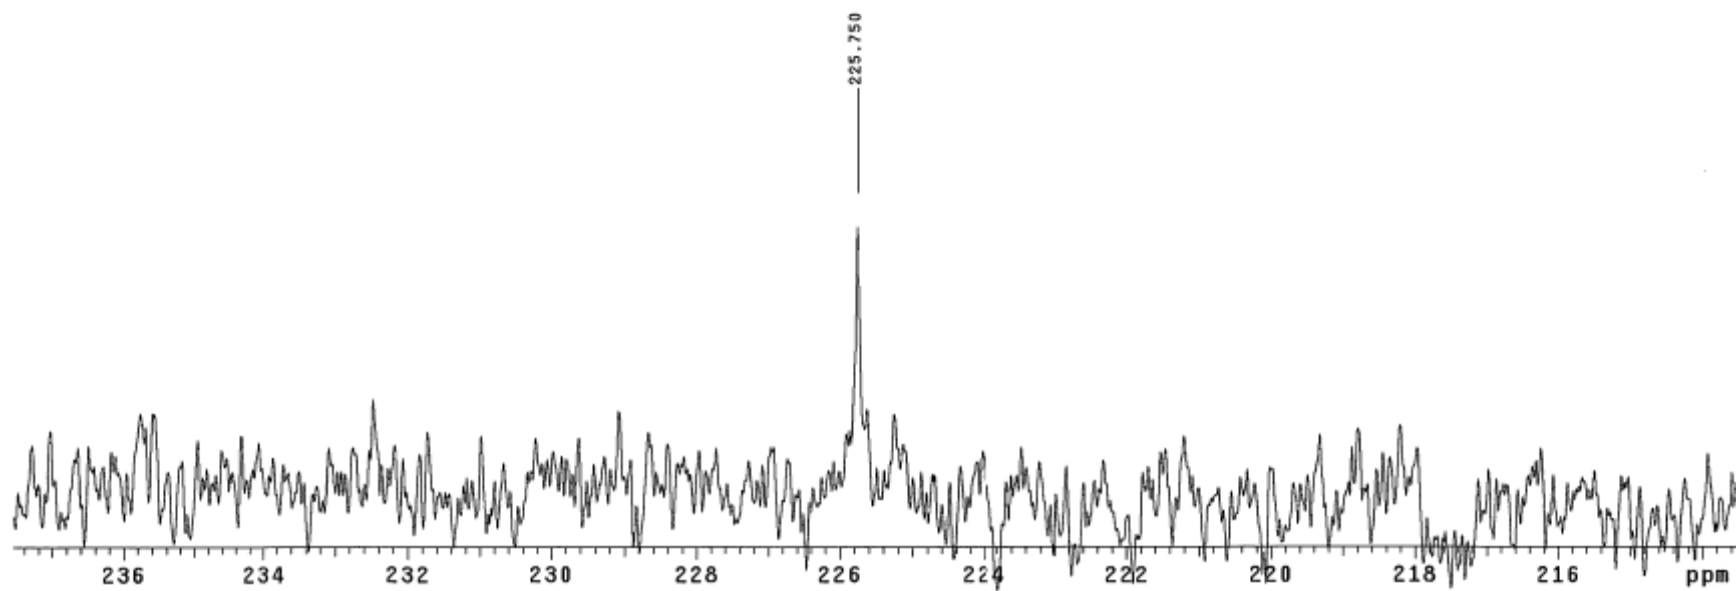

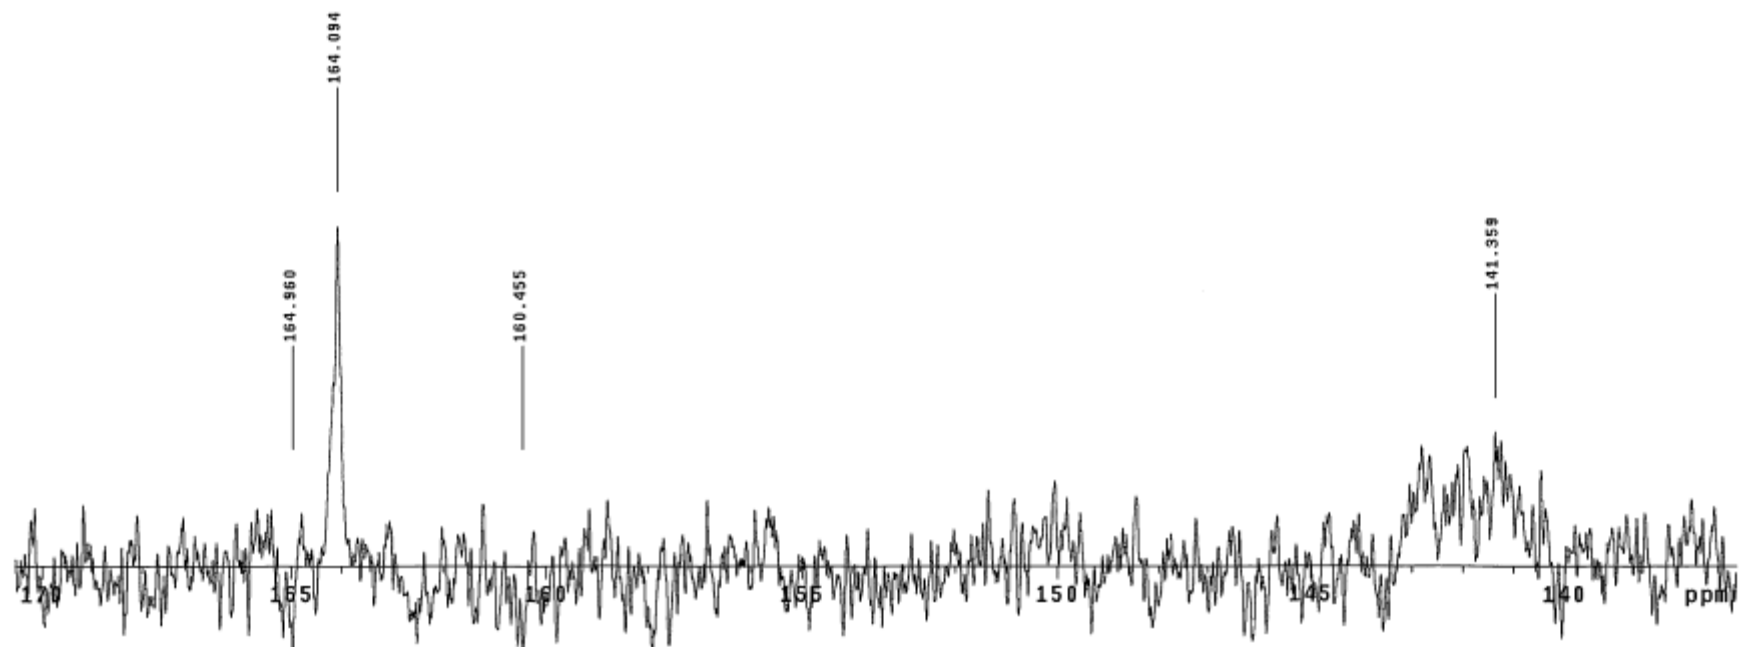

KAW8-117  
temp=60c

File: Carbon

Pulse Sequence: s2pu1

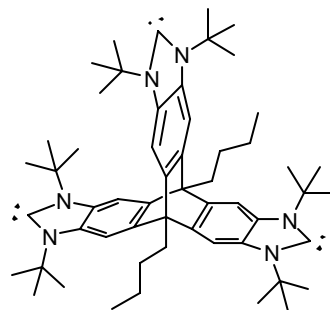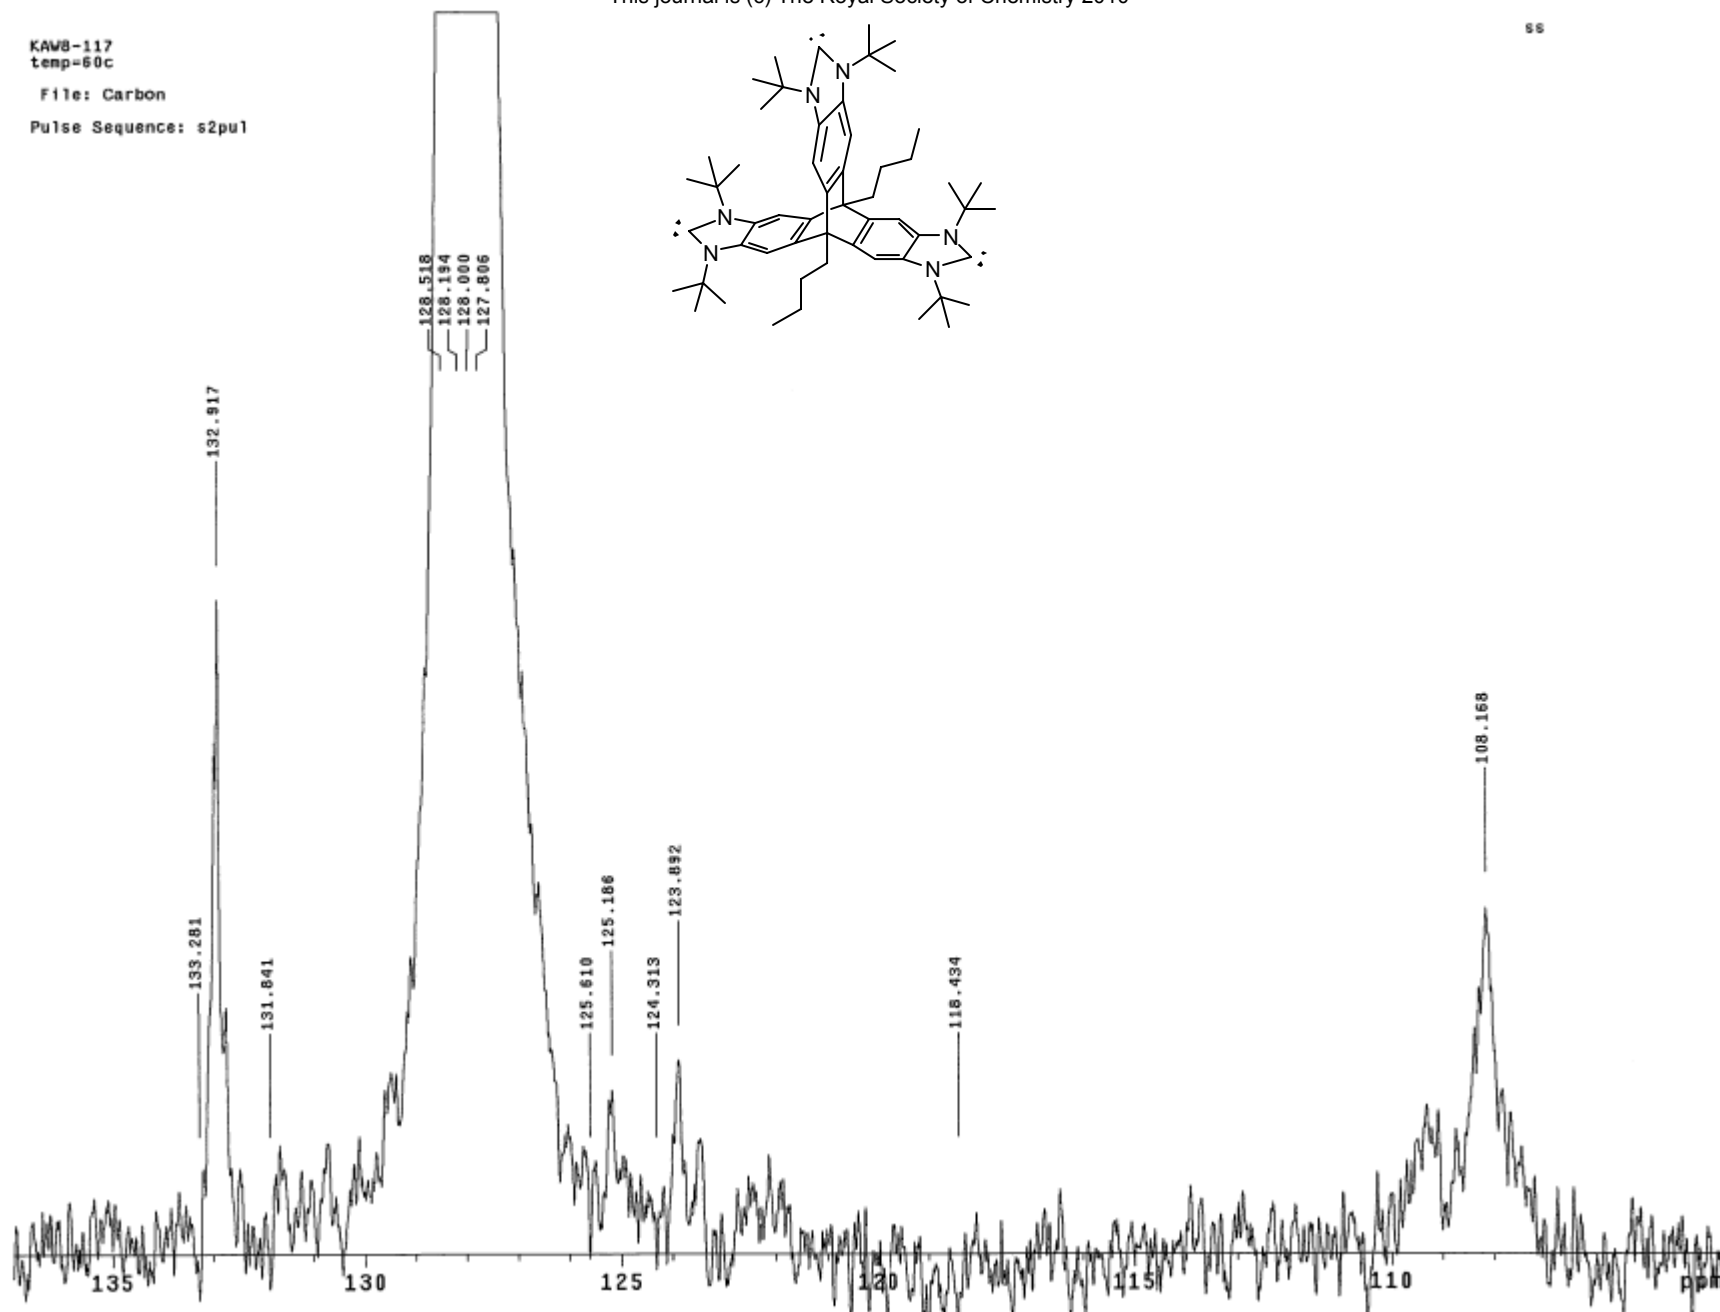

KAW8-117  
temp=60c

File: Carbon

Pulse Sequence: s2pu1

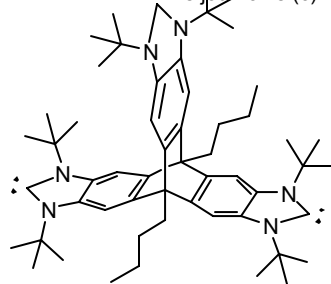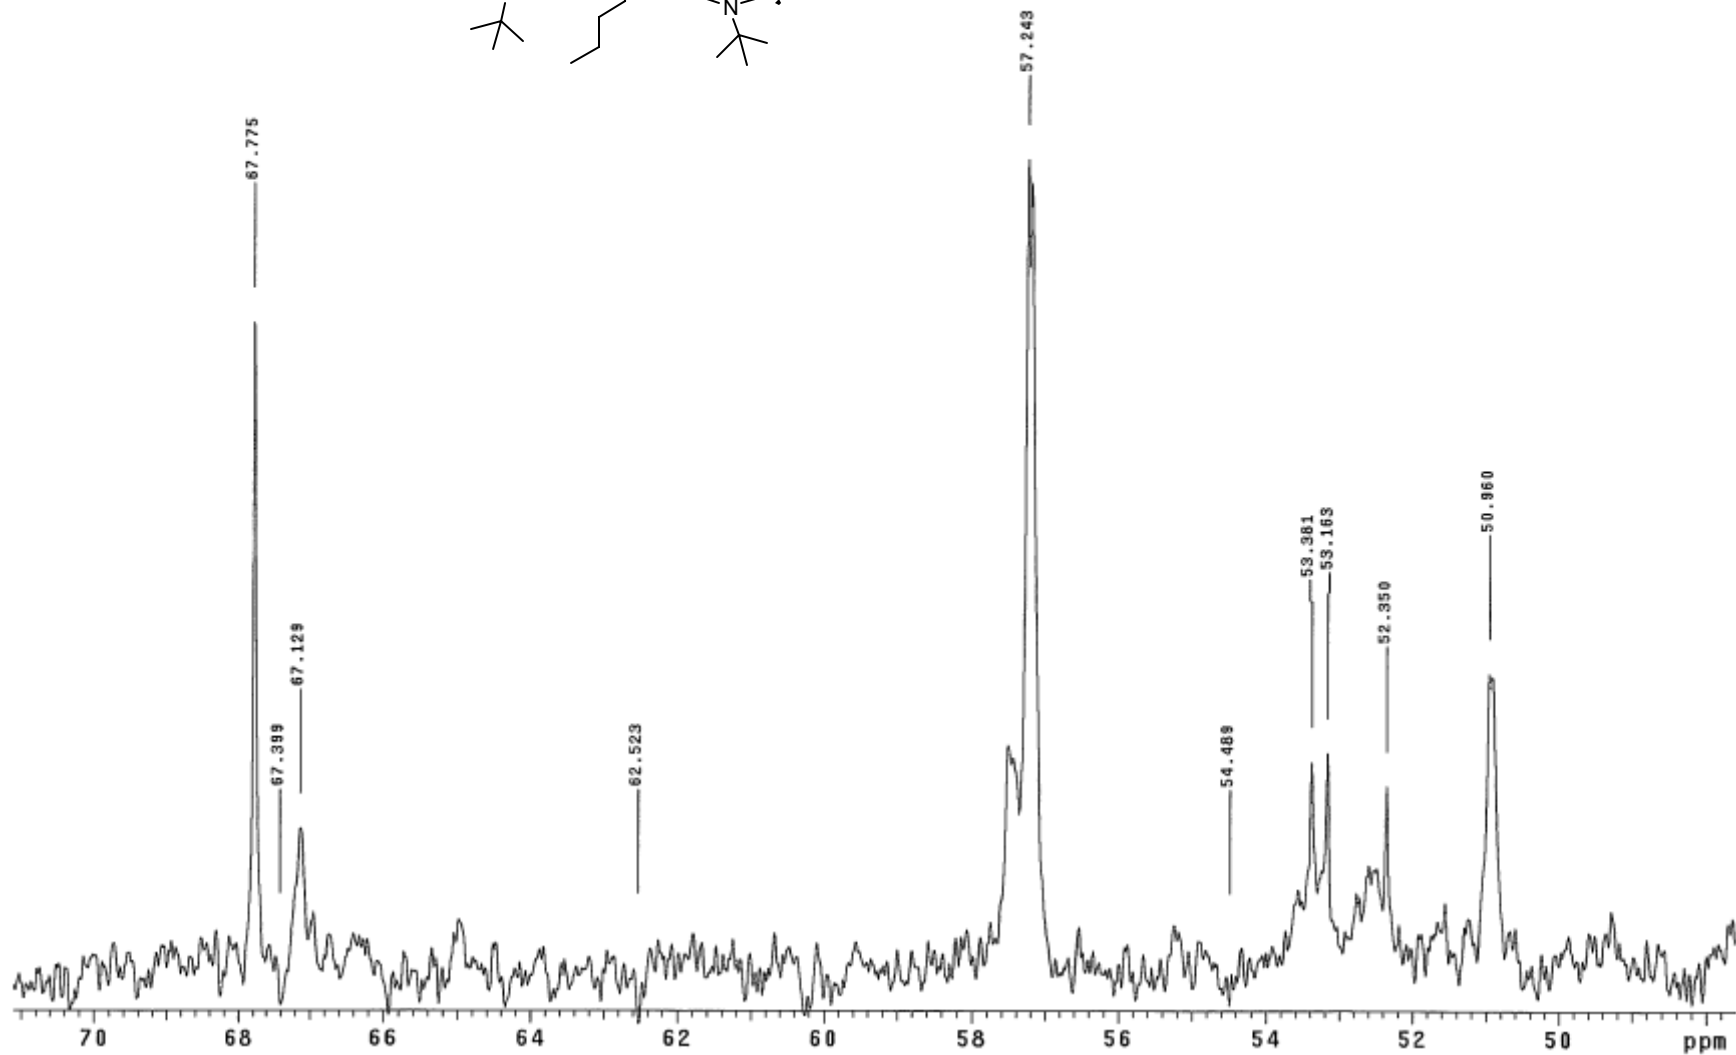

KAW8-117  
temp=60c  
File: Carbon  
Pulse Sequence: s2pu1

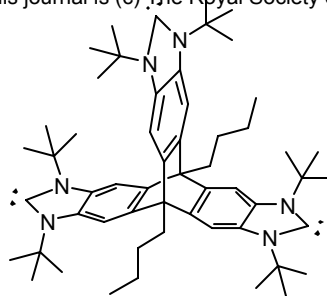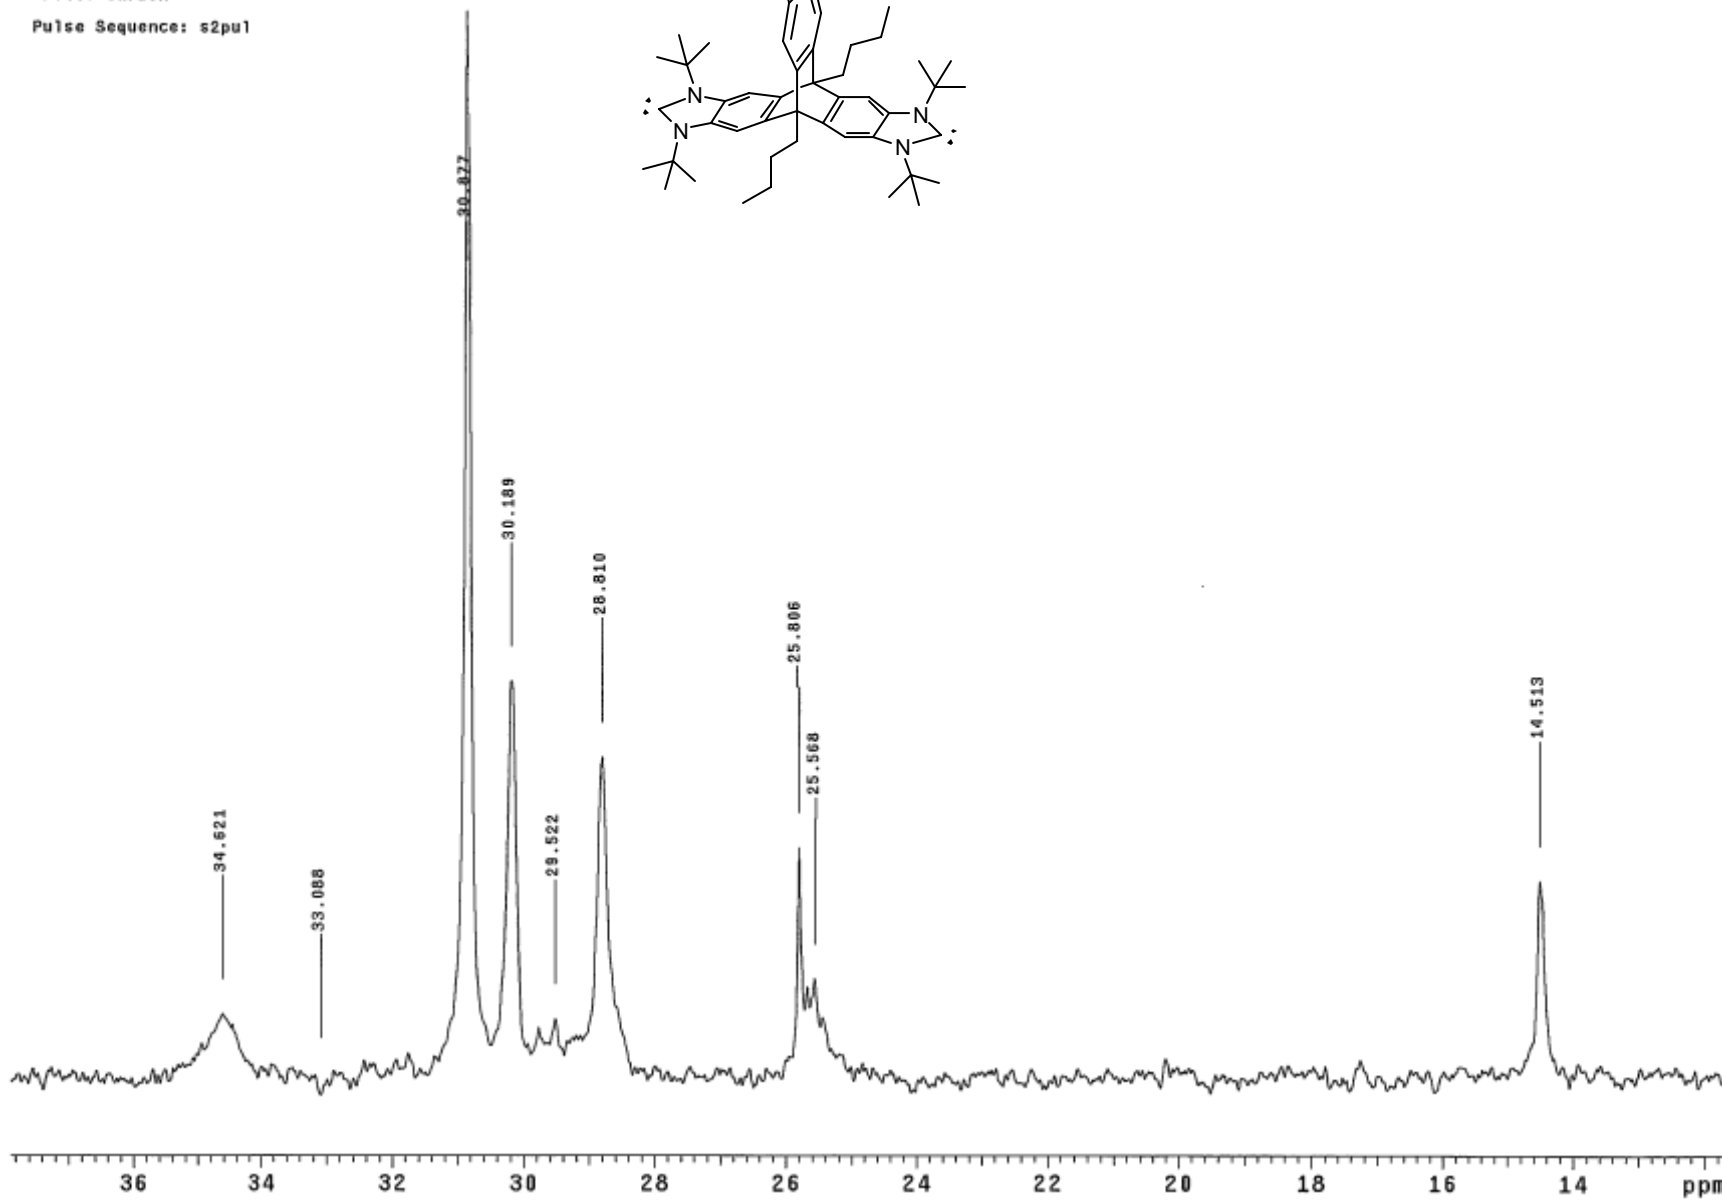

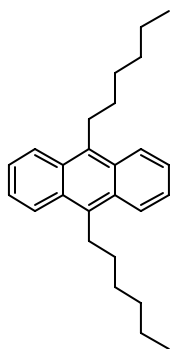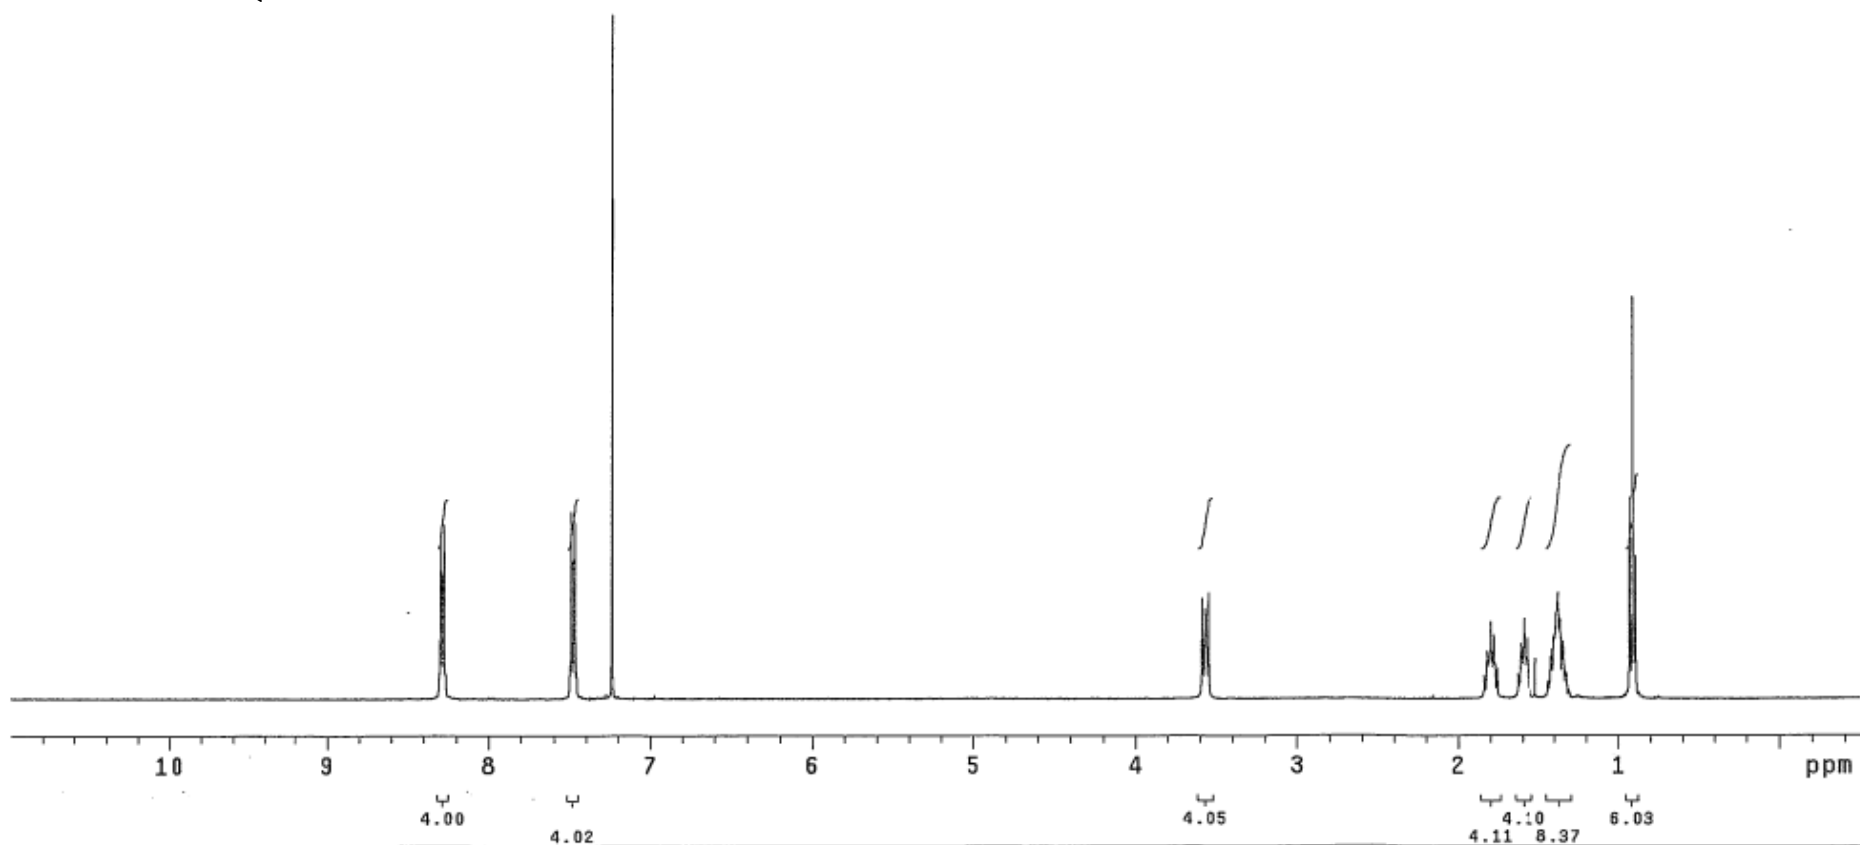

|                                                                                                                                   |                                |                                                                                          |                                                                                                                                          |
|-----------------------------------------------------------------------------------------------------------------------------------|--------------------------------|------------------------------------------------------------------------------------------|------------------------------------------------------------------------------------------------------------------------------------------|
| <b>PULSE SEQUENCE</b><br>Relax. delay 2.000 sec<br>Pulse 16.4 degrees<br>Acq. time 2.856 sec<br>Width 5602.2 Hz<br>17 repetitions | <b>OBSERVE</b> H1, 400.2669859 | <b>DATA PROCESSING</b><br>Line broadening 0.1 Hz<br>FT size 32768<br>Total time 1 minute | <b>KAW8-205-reX2</b><br>CDC13<br>12-11-09<br><b>Pulse Sequence: s2pu1</b><br>Solvent: CDC13<br>Ambient temperature<br>Mercury-400 "nmr6" |
|-----------------------------------------------------------------------------------------------------------------------------------|--------------------------------|------------------------------------------------------------------------------------------|------------------------------------------------------------------------------------------------------------------------------------------|

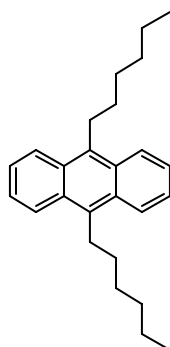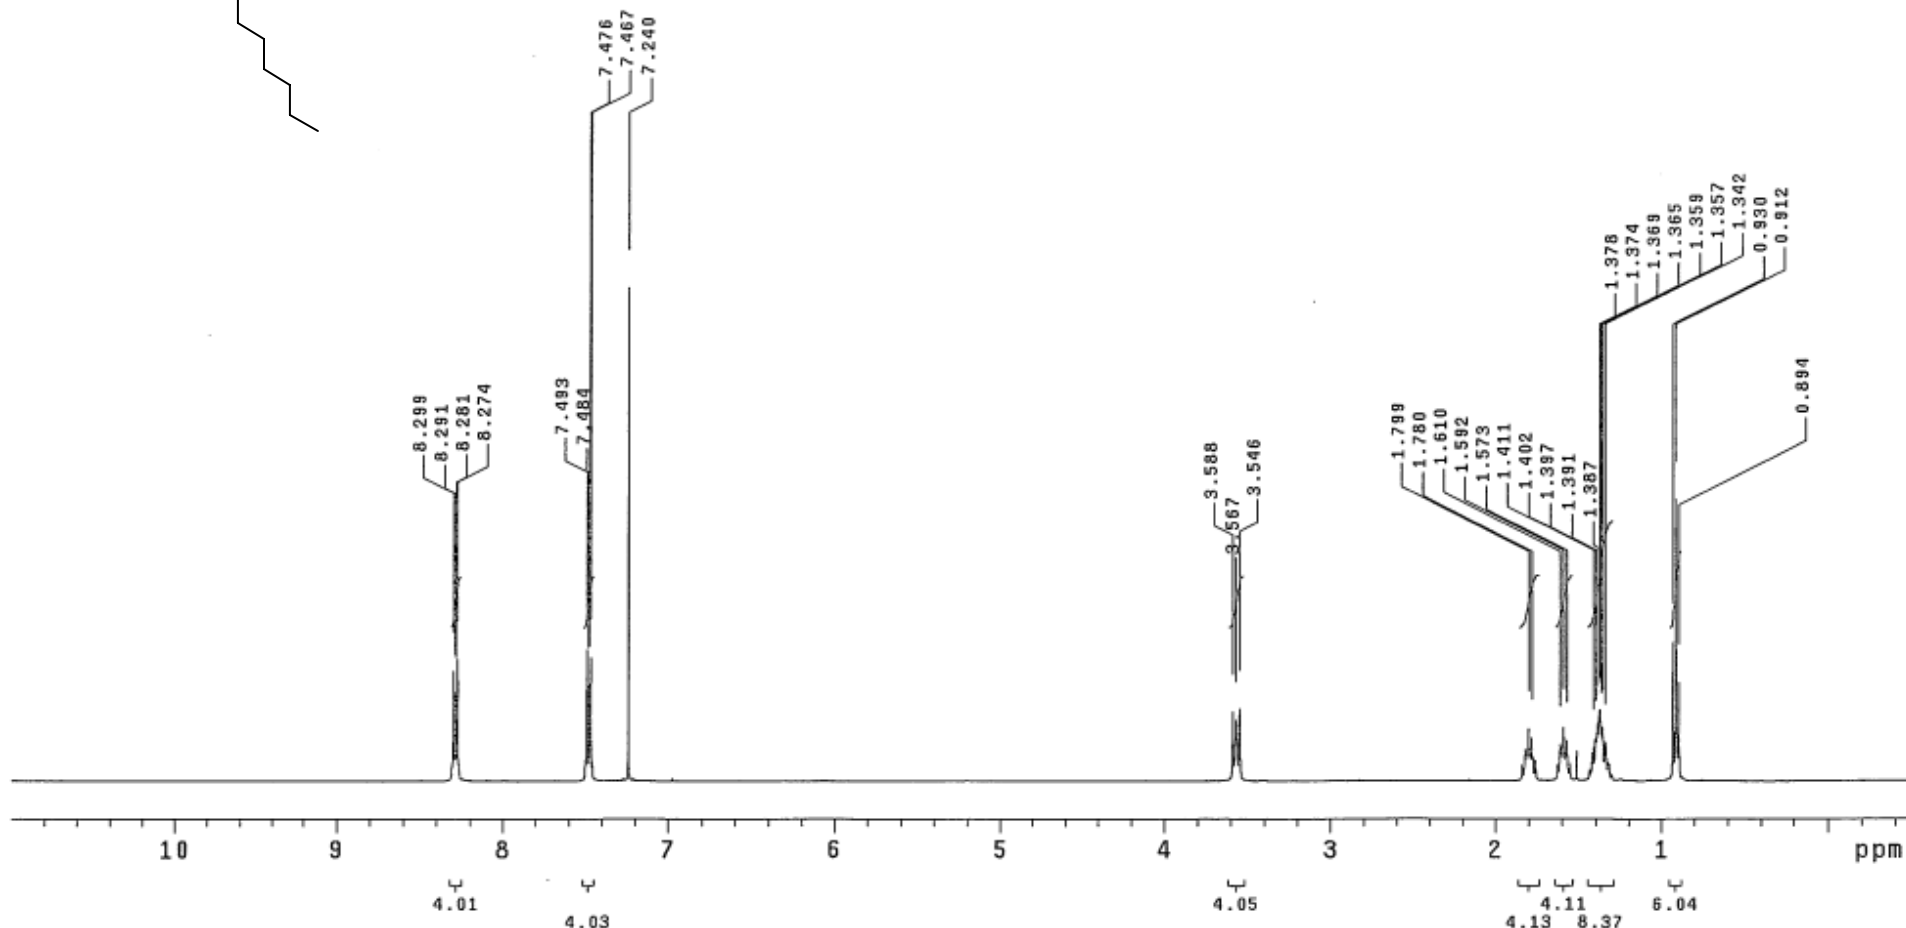

|                                                                                                                            |                         |                                                                                    |                                                                                                                            |
|----------------------------------------------------------------------------------------------------------------------------|-------------------------|------------------------------------------------------------------------------------|----------------------------------------------------------------------------------------------------------------------------|
| PULSE SEQUENCE<br>Relax. delay 2.000 sec<br>Pulse 16.4 degrees<br>Acq. time 2.856 sec<br>Width 5602.2 Hz<br>33 repetitions | OBSERVE H1, 400.2669859 | DATA PROCESSING<br>Line broadening 0.1 Hz<br>FT size 32768<br>Total time 2 minutes | KAW8-205-reX2<br>CDC13<br>12-11-09<br>Pulse Sequence: s2pul<br>Solvent: CDC13<br>Ambient temperature<br>Mercury-400 "nmr6" |
|----------------------------------------------------------------------------------------------------------------------------|-------------------------|------------------------------------------------------------------------------------|----------------------------------------------------------------------------------------------------------------------------|



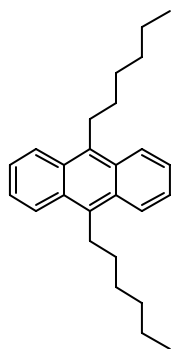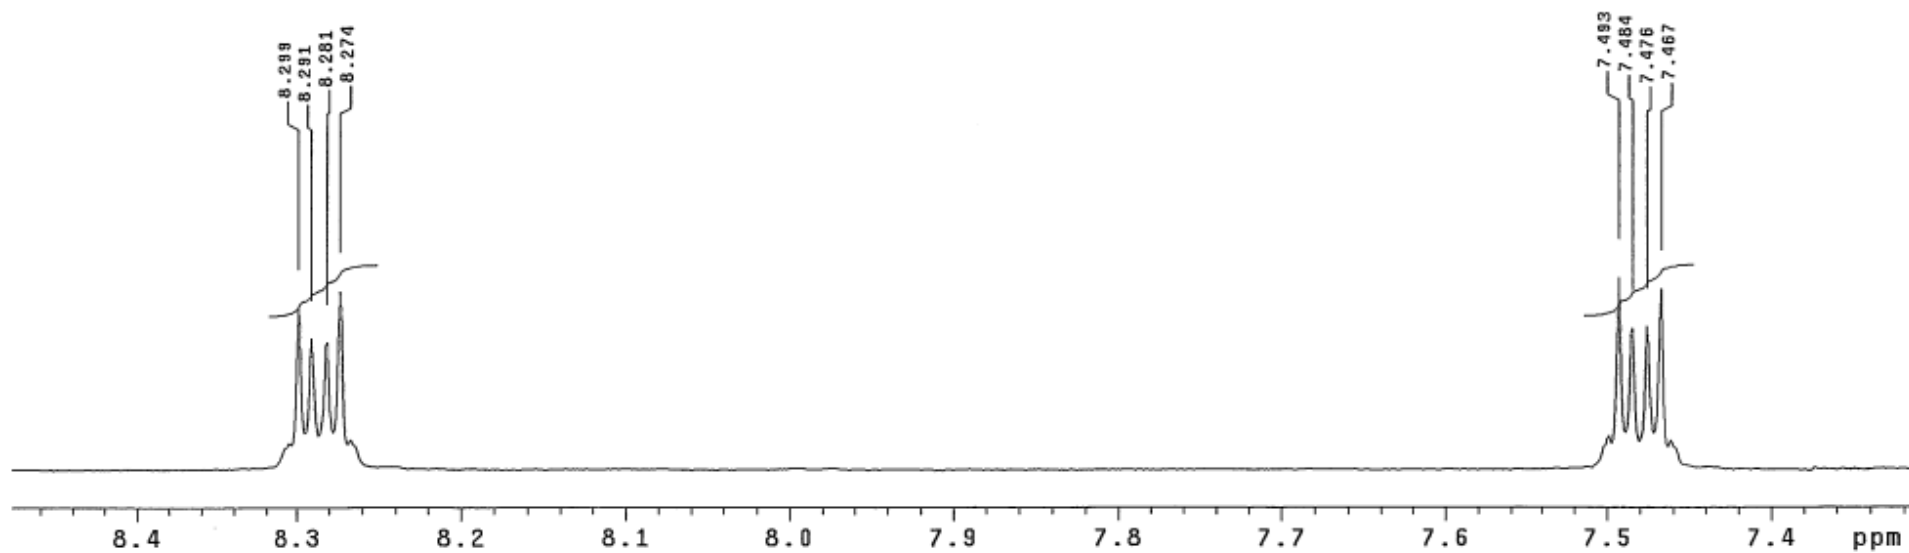

|                                                                                                                                   |                                |                                                                                           |                                                                                                                                          |
|-----------------------------------------------------------------------------------------------------------------------------------|--------------------------------|-------------------------------------------------------------------------------------------|------------------------------------------------------------------------------------------------------------------------------------------|
| <b>PULSE SEQUENCE</b><br>Relax. delay 2.000 sec<br>Pulse 16.4 degrees<br>Acq. time 2.856 sec<br>Width 5602.2 Hz<br>19 repetitions | <b>OBSERVE</b> H1, 400.2669859 | <b>DATA PROCESSING</b><br>Line broadening 0.1 Hz<br>FT size 32768<br>Total time 1 minutes | <b>4.02</b><br>KAW8-205-rx2<br>CDC13<br>12-11-09<br>Pulse Sequence: s2pu1<br>Solvent: CDC13<br>Ambient temperature<br>Mercury-400 "nmr6" |
|-----------------------------------------------------------------------------------------------------------------------------------|--------------------------------|-------------------------------------------------------------------------------------------|------------------------------------------------------------------------------------------------------------------------------------------|

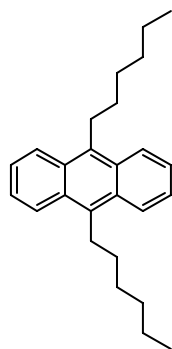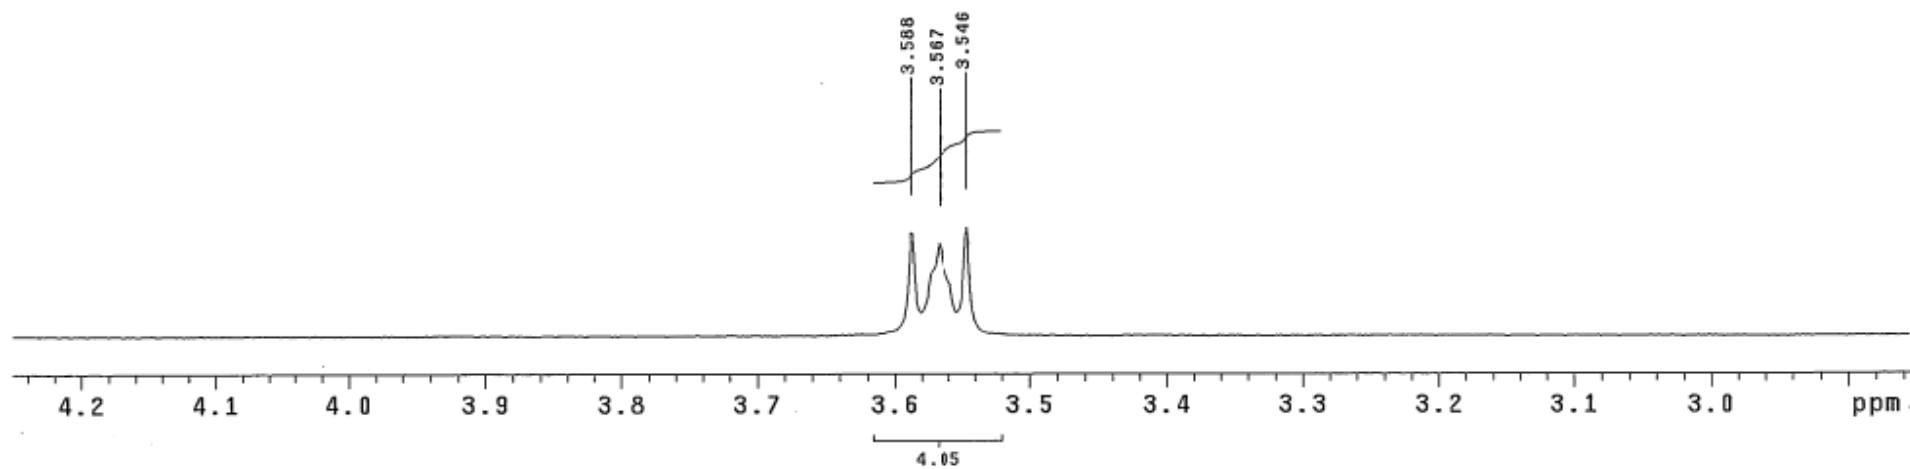

|                                                                                                                                   |                                |                                                                                           |                                                                                                                                          |
|-----------------------------------------------------------------------------------------------------------------------------------|--------------------------------|-------------------------------------------------------------------------------------------|------------------------------------------------------------------------------------------------------------------------------------------|
| <b>PULSE SEQUENCE</b><br>Relax. delay 2.000 sec<br>Pulse 16.4 degrees<br>Acq. time 2.856 sec<br>Width 5602.2 Hz<br>26 repetitions | <b>OBSERVE</b> H1, 400.2669859 | <b>DATA PROCESSING</b><br>Line broadening 0.1 Hz<br>FT size 32768<br>Total time 2 minutes | <b>KAW8-205-reX2</b><br>CDC13<br>12-11-09<br><b>Pulse Sequence: s2pu1</b><br>Solvent: CDC13<br>Ambient temperature<br>Mercury-400 "nmr6" |
|-----------------------------------------------------------------------------------------------------------------------------------|--------------------------------|-------------------------------------------------------------------------------------------|------------------------------------------------------------------------------------------------------------------------------------------|

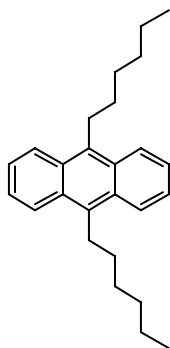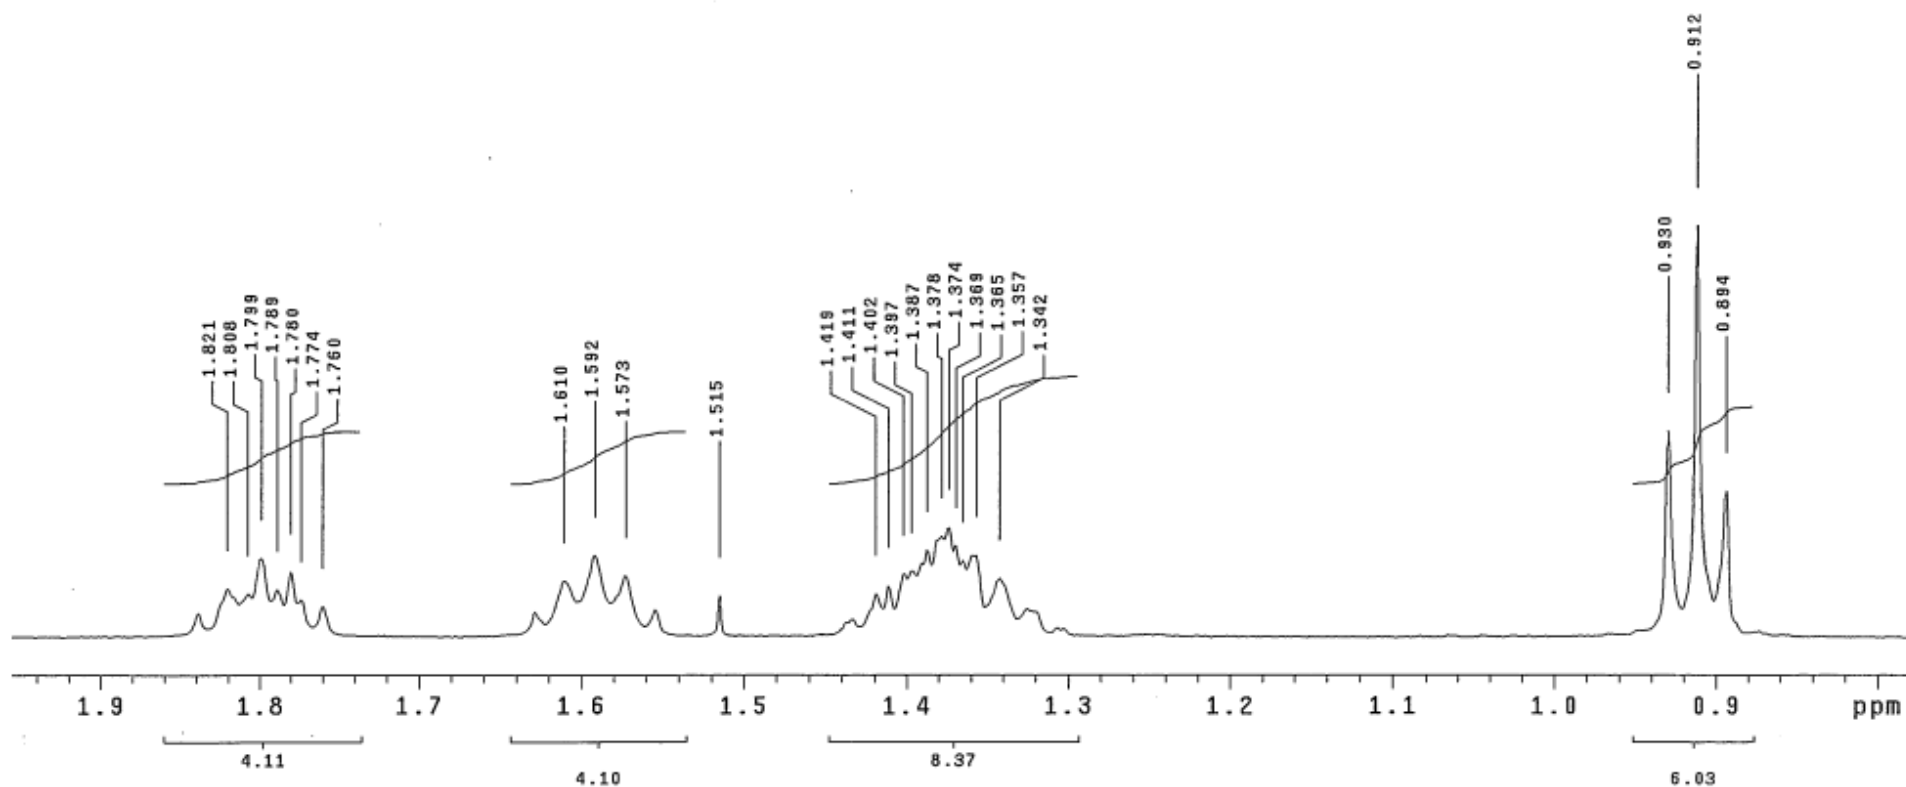

|                                                                                                                                   |                                |                                                                                           |                                                                                                                                          |
|-----------------------------------------------------------------------------------------------------------------------------------|--------------------------------|-------------------------------------------------------------------------------------------|------------------------------------------------------------------------------------------------------------------------------------------|
| <b>PULSE SEQUENCE</b><br>Relax. delay 2.000 sec<br>Pulse 16.4 degrees<br>Acq. time 2.856 sec<br>Width 5602.2 Hz<br>30 repetitions | <b>OBSERVE</b> H1, 400.2669859 | <b>DATA PROCESSING</b><br>Line broadening 0.1 Hz<br>FT size 32768<br>Total time 2 minutes | <b>KAW8-205-reX2</b><br>CDC13<br>12-11-09<br><b>Pulse Sequence: s2pu1</b><br>Solvent: CDC13<br>Ambient temperature<br>Mercury-400 "nmr6" |
|-----------------------------------------------------------------------------------------------------------------------------------|--------------------------------|-------------------------------------------------------------------------------------------|------------------------------------------------------------------------------------------------------------------------------------------|

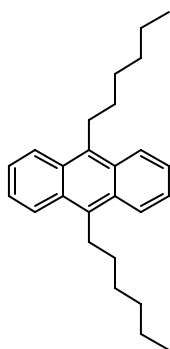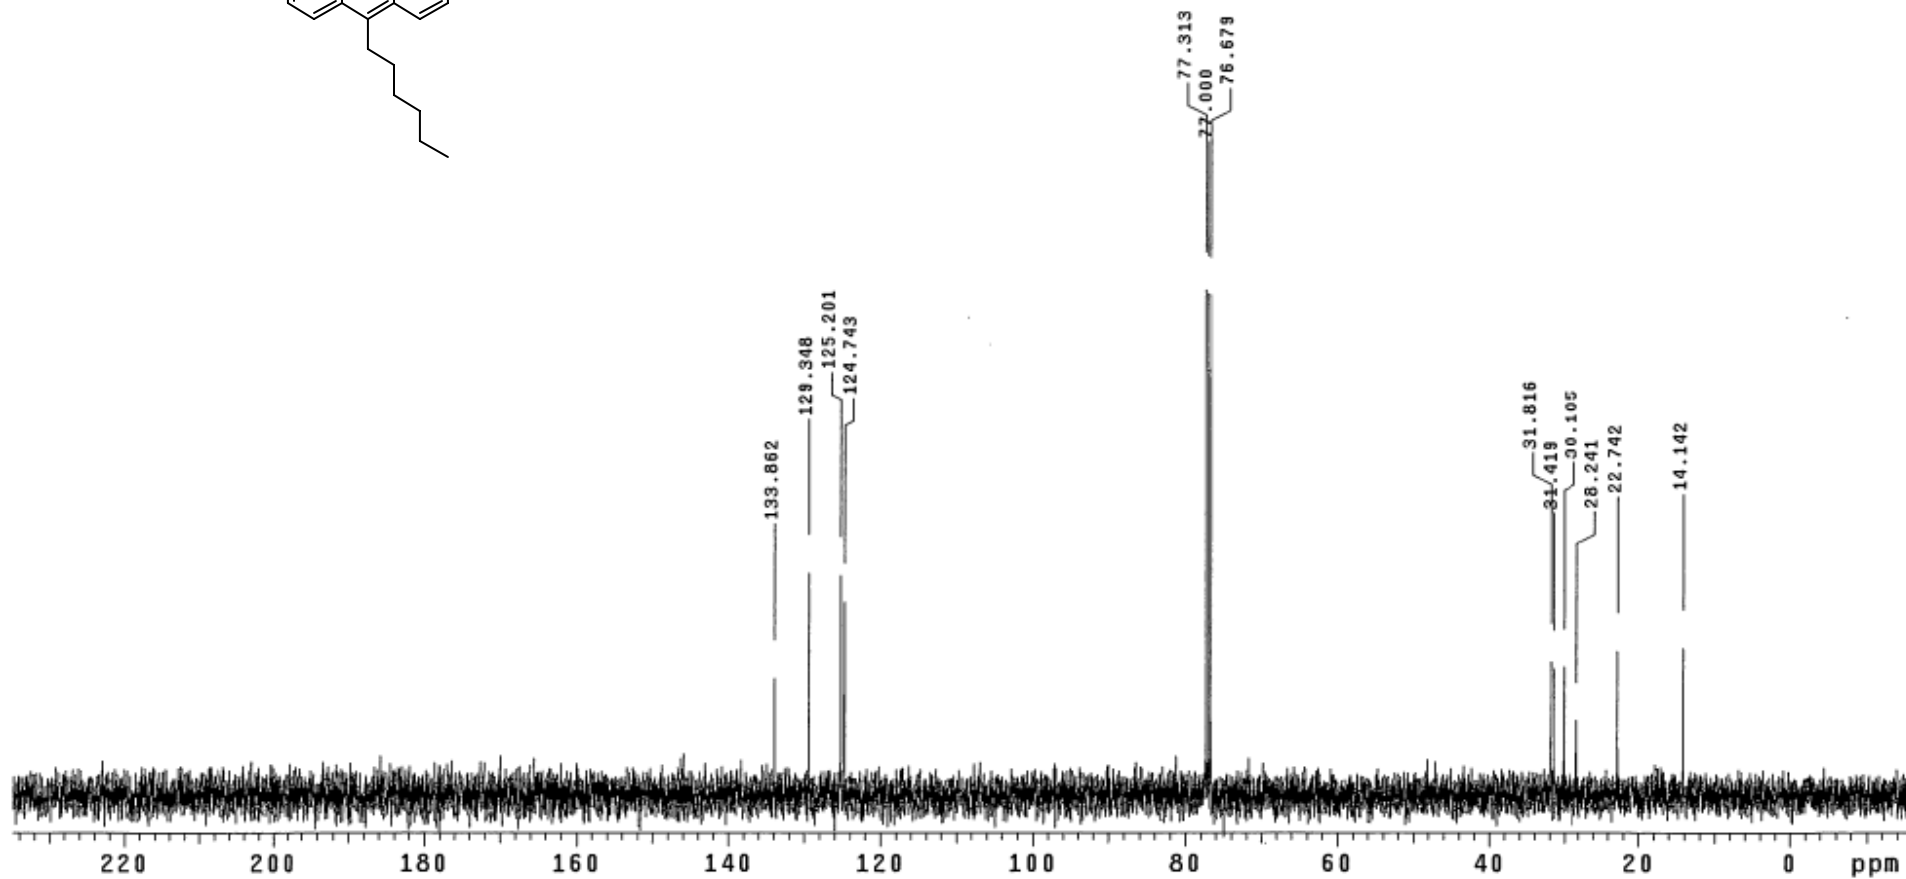

PULSE SEQUENCE  
Relax. delay 2.000 sec  
Pulse 22.5 degrees  
Acq. time 1.280 sec  
Width 25188.9 Hz  
118 repetitions

OBSERVE C13, 100.6472161  
DECOUPLE H1, 400.2689955  
Power 38 dB  
continuously on  
WALTZ-16 modulated

DATA PROCESSING  
Line broadening 1.0 Hz  
FT size 65536  
Total time 6 minutes

KAW8-177-2-13C  
CDC13  
11-13-09

Pulse Sequence: s2pu1  
Solvent: CDC13  
Ambient temperature  
Mercury-400 "nmr6"

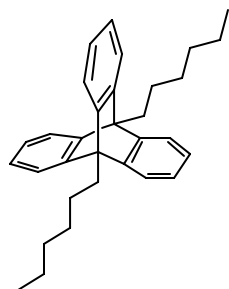

500 MHz nmr0

KAW8-210  
temp=50c

exp1 s2pu1

| SAMPLE      |             | SPECIAL    |        |
|-------------|-------------|------------|--------|
| date        | Jan 14 2010 | temp       | 50.0   |
| solvent     | cdc13       | gain       | 30     |
| file        | exp         | spin       | 20     |
| ACQUISITION |             | SPECIAL    |        |
| sw          | 7997.6      | hst        | 0.008  |
| at          | 4.001       | pw90       | 11.000 |
| np          | 64000       | alfa       | 6.600  |
| fb          | 4000        | FLAGS      |        |
| bs          | 1           | i1         | n      |
| d1          | 2.000       | in         | n      |
| nt          | 64          | dp         | y      |
| ct          | 64          | hs         | nn     |
| TRANSMITTER |             | PROCESSING |        |
| tn          | H1          | lb         | 0.10   |
| sfrq        | 499.868     | fn         | 262144 |
| tof         | 499.8       | DISPLAY    |        |
| tpwr        | 57          | sp         | -249.9 |
| pw          | 1.833       | wp         | 5248.5 |
| DECOUPLER   |             | rf1        | 4627.2 |
| dn          | C13         | rfp        | 3619.0 |
| dof         | 0           | rp         | 261.7  |
| ds          | nnn         | lp         | -4.7   |
| dms         | c           | PLOT       |        |
| dpwr        | 40          | wc         | 250    |
| dmf         | 14285       | sc         | 0      |
|             |             | vs         | 1002   |
|             |             | th         | 9      |
|             |             | al         | ph     |

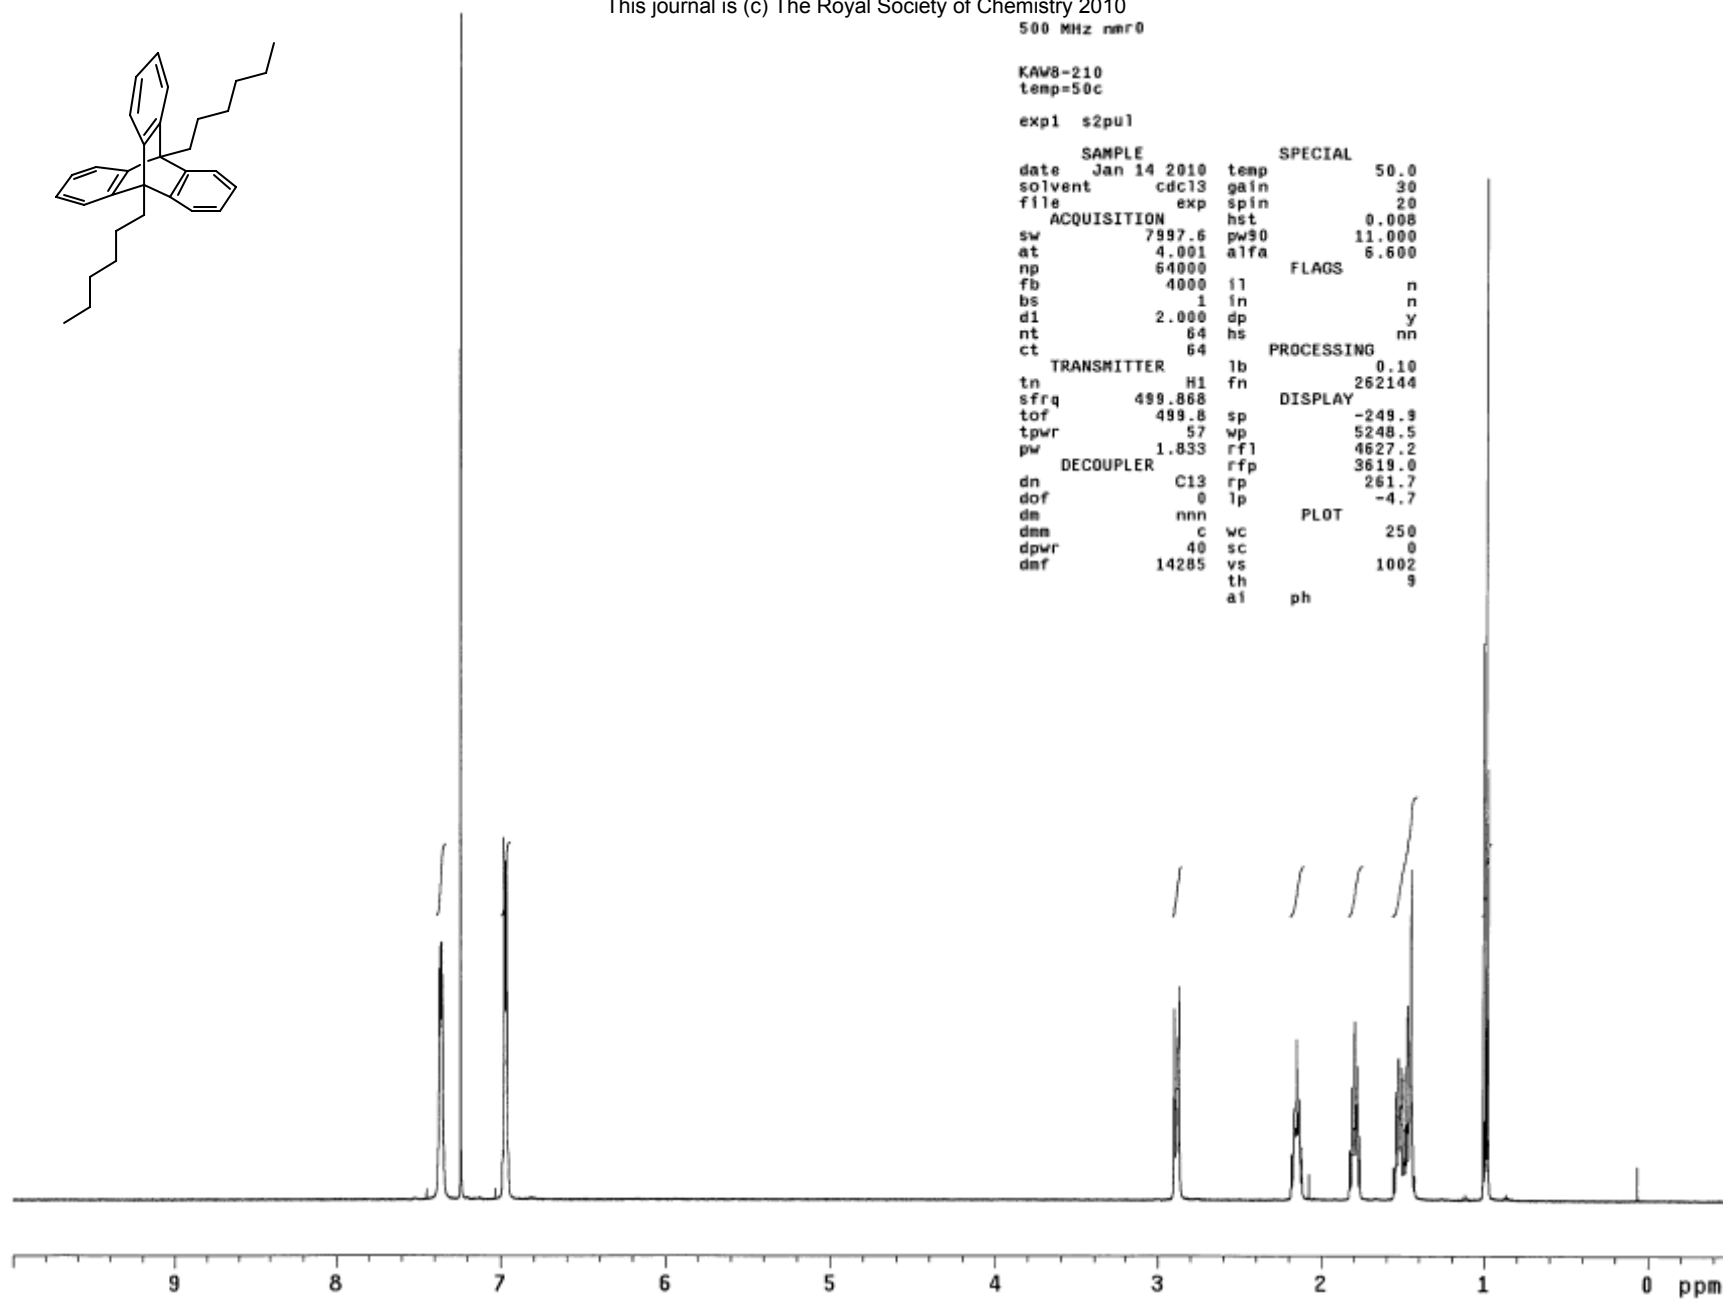

KAWB-210  
Temp=50c  
File: PROTON  
Pulse Sequence: s2pu1

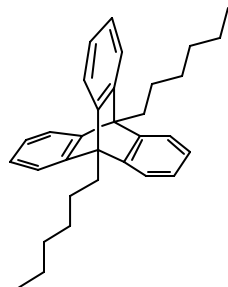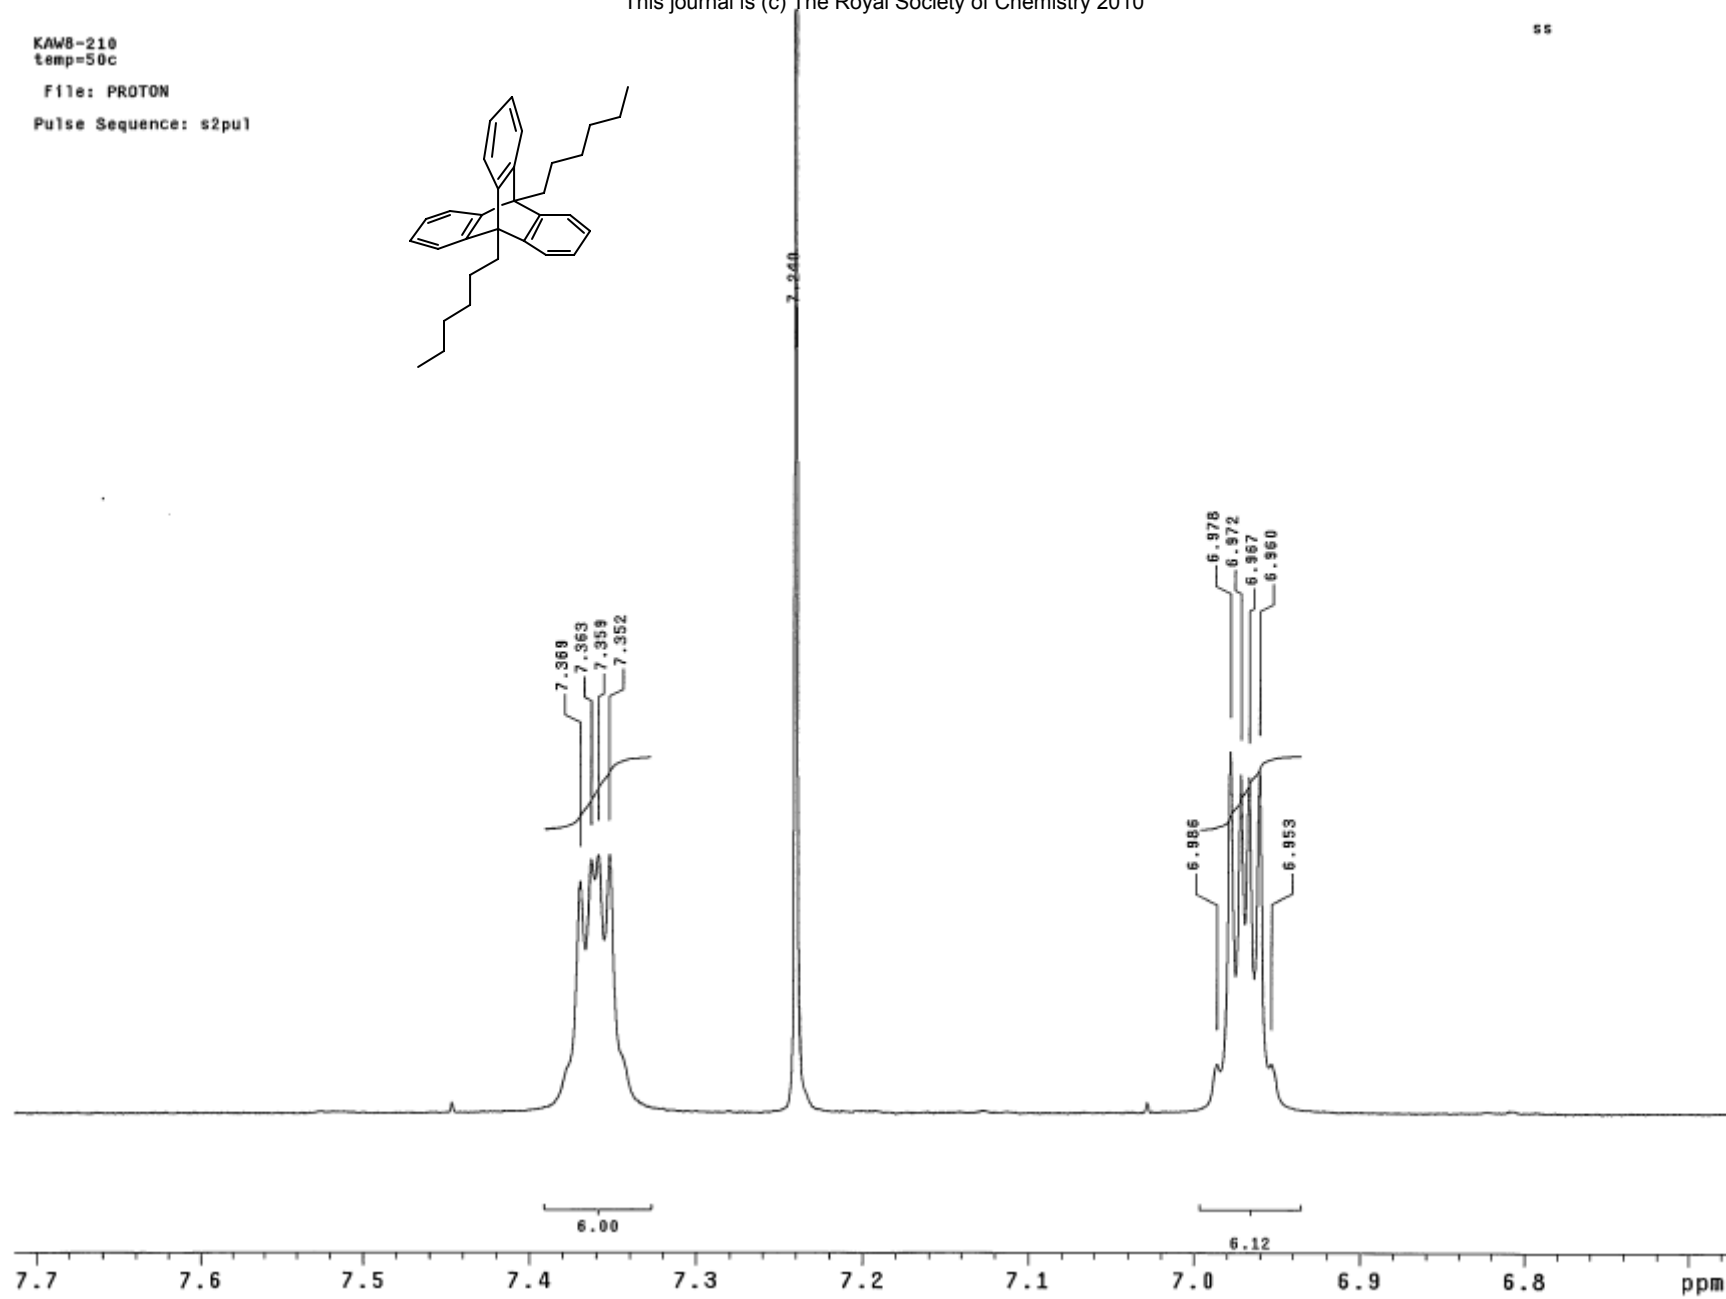

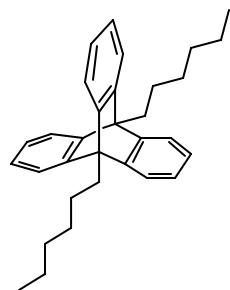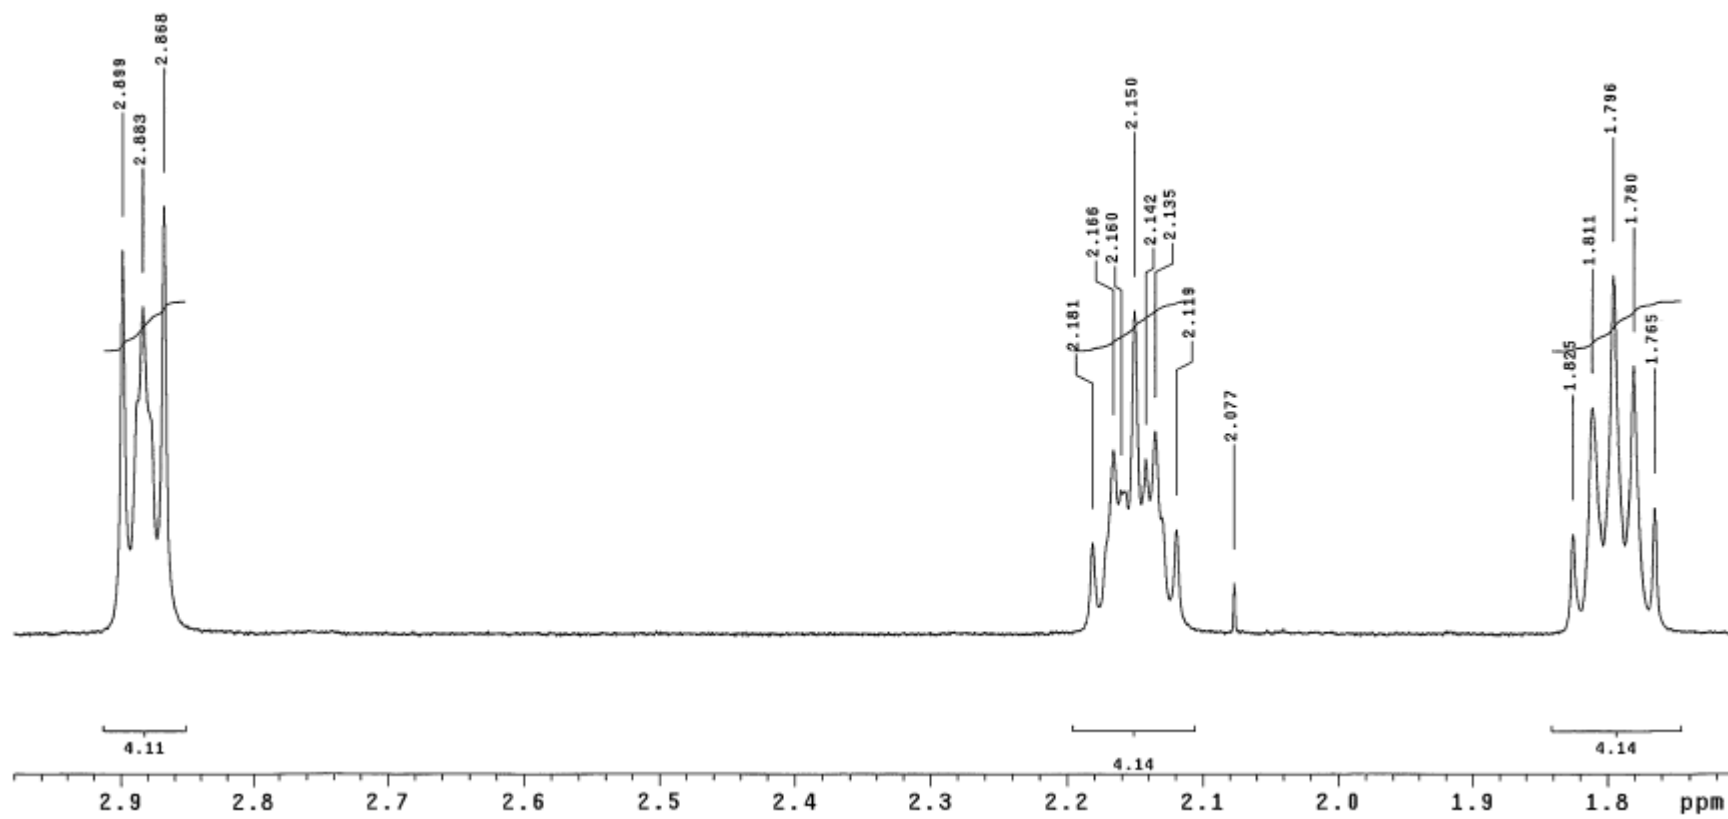

KAW8-210  
temp=50c

File: PROTON

Pulse Sequence: s2pu1

S5

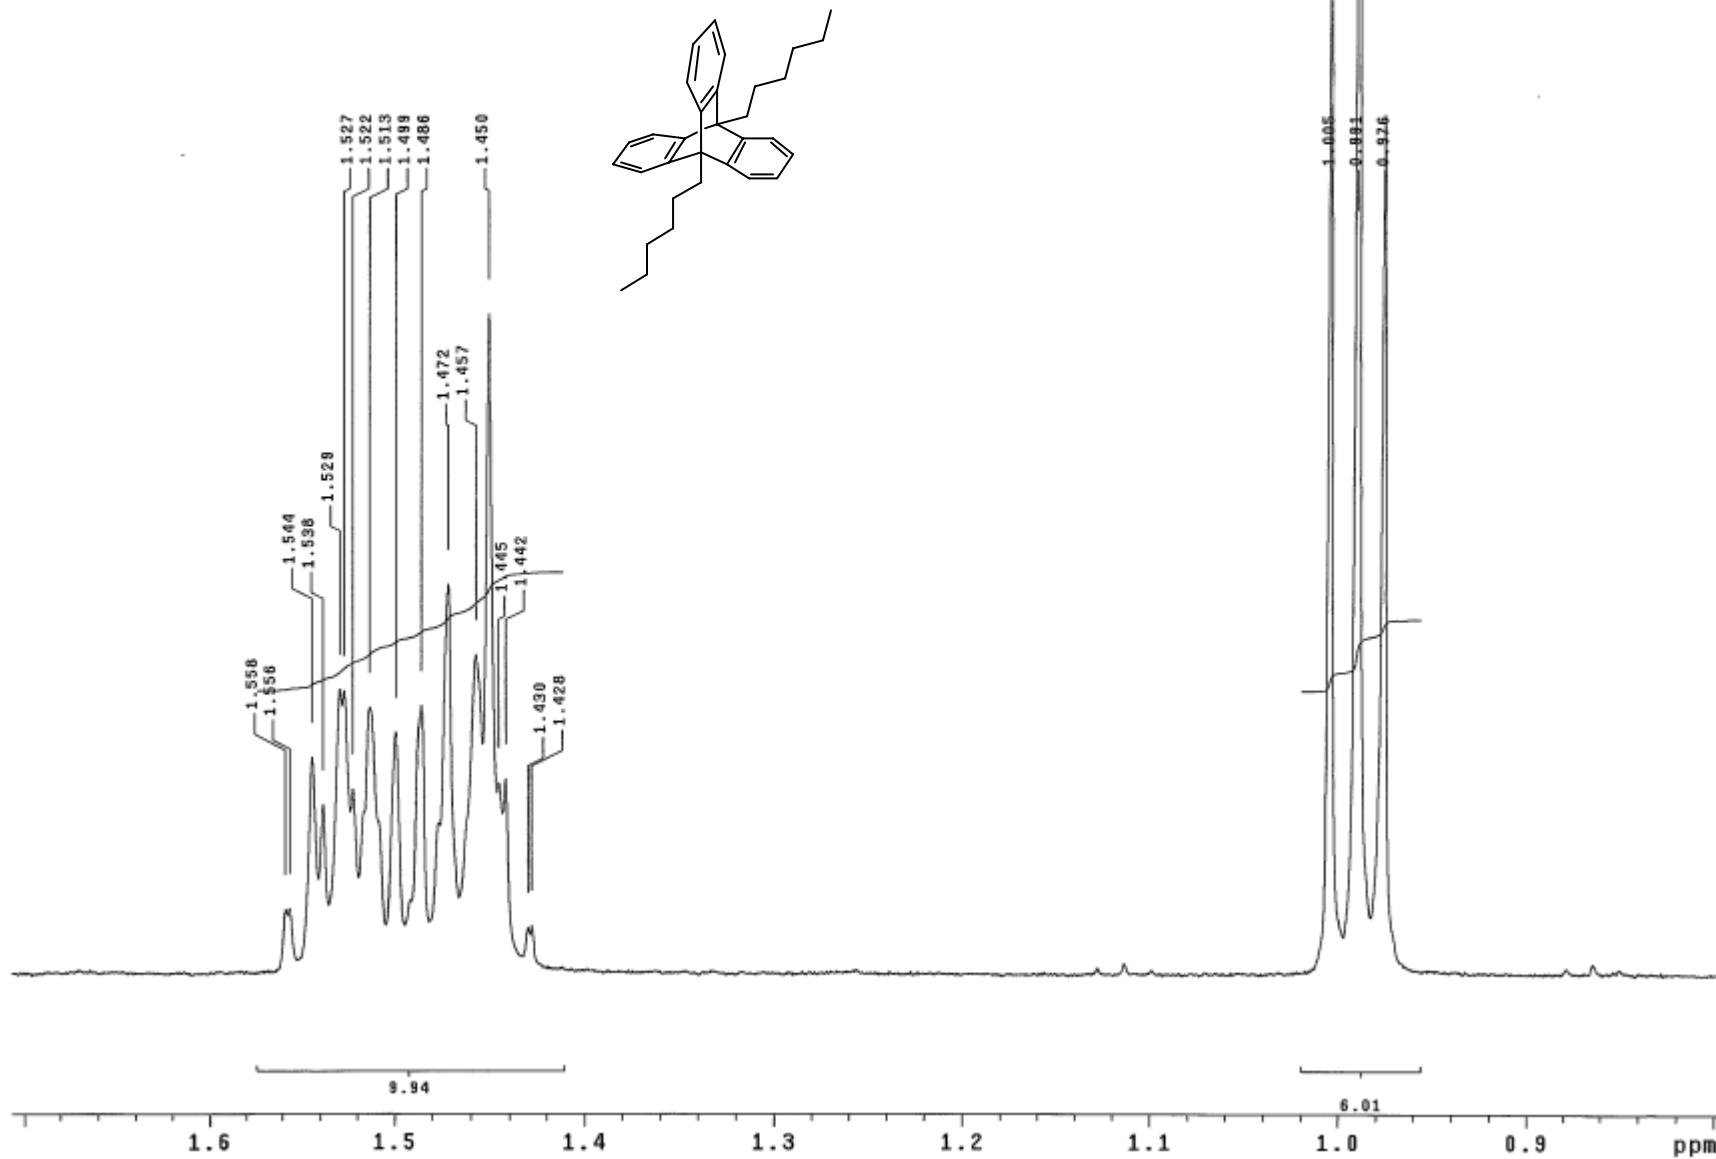



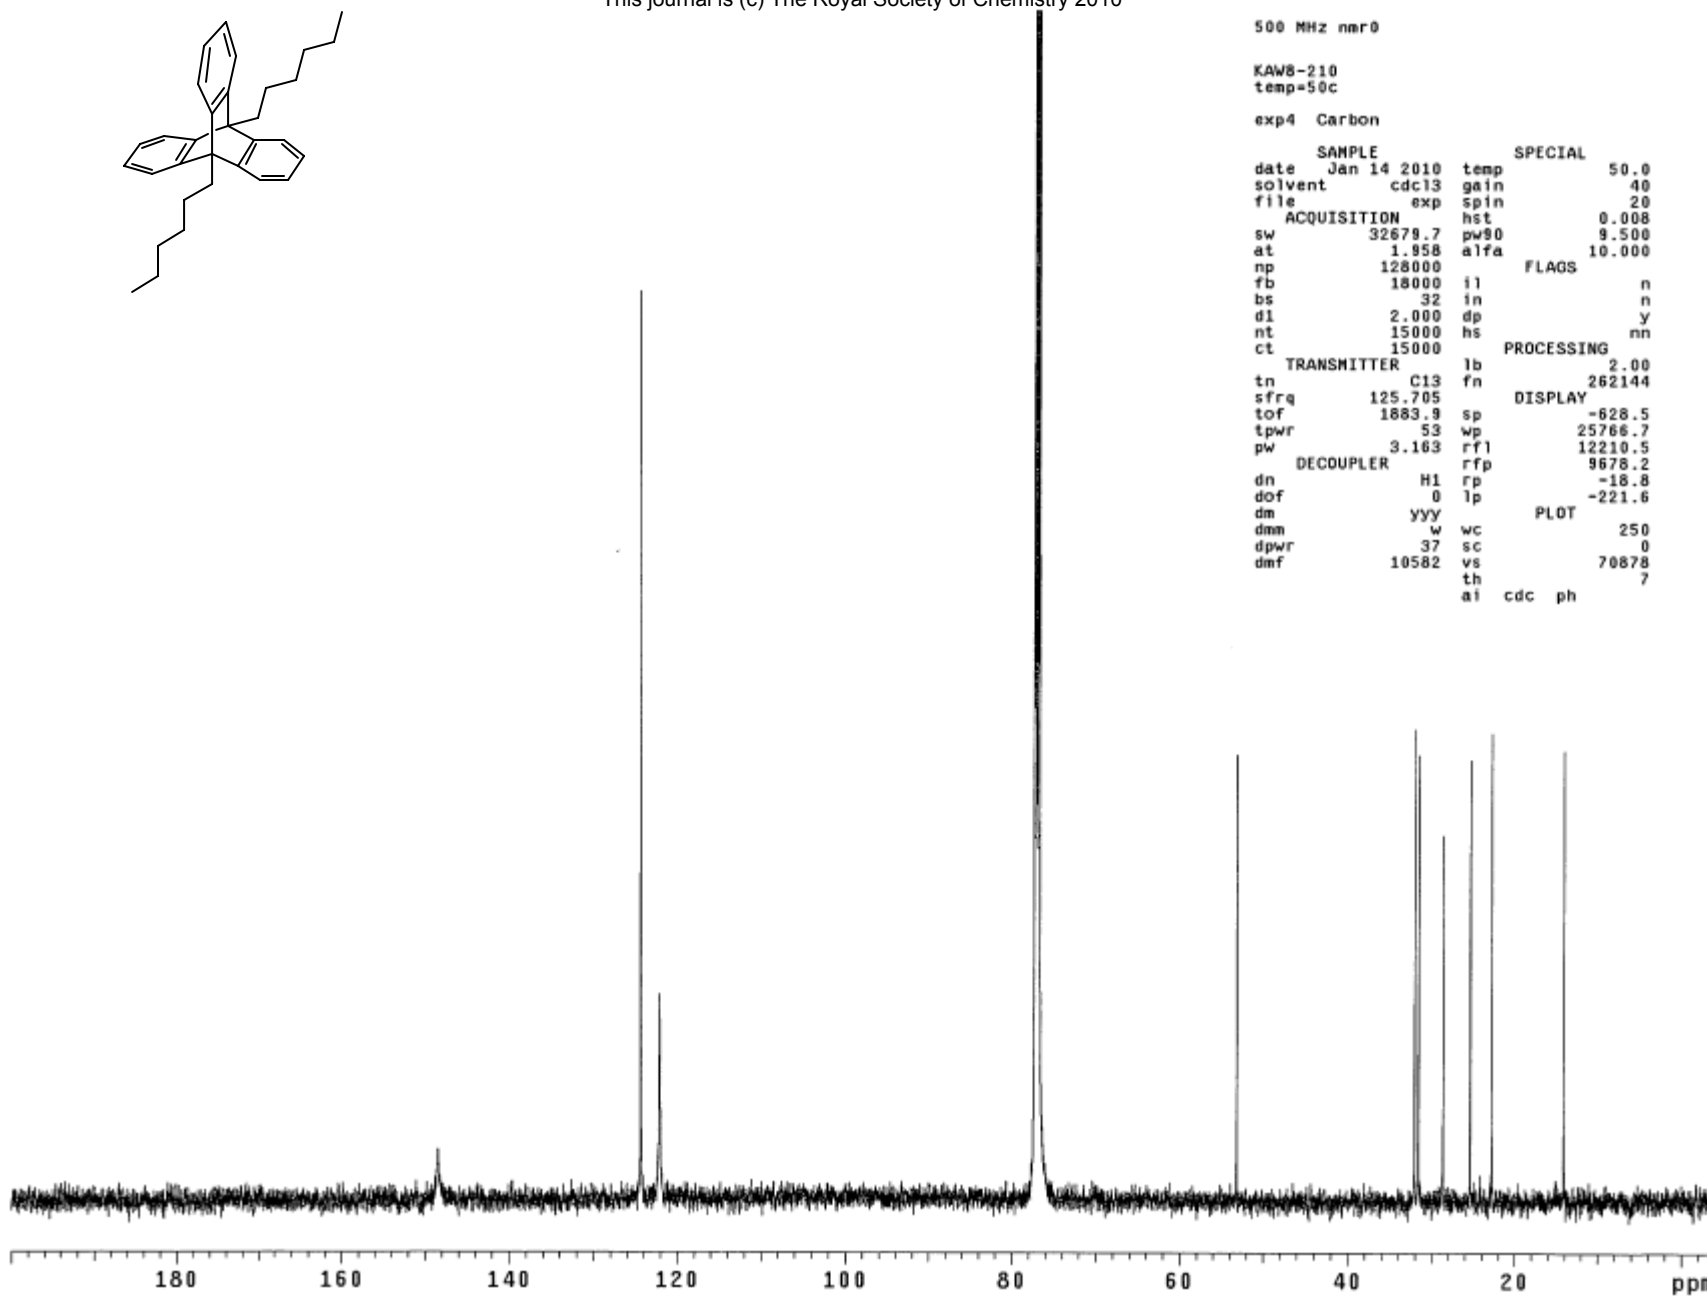

500 MHz nmr0

KAW8-210  
temp=50c

exp4 Carbon

| SAMPLE      |             | SPECIAL     |         |
|-------------|-------------|-------------|---------|
| date        | Jan 14 2010 | temp        | 50.0    |
| solvent     | cdc13       | gain        | 40      |
| file        | exp         | spin        | 20      |
| ACQUISITION |             | ACQUISITION |         |
| sw          | 32679.7     | hst         | 0.008   |
| at          | 1.958       | pw90        | 9.500   |
| np          | 128000      | alfa        | 10.000  |
| TRANSMITTER |             | PROCESSING  |         |
| tn          | C13         | lb          | 2.00    |
| sfrq        | 125.705     | fn          | 262144  |
| tof         | 1883.9      | sp          | -628.5  |
| tpwr        | 53          | wp          | 25766.7 |
| pw          | 3.163       | rf1         | 12210.5 |
| DECOUPLER   |             | DECOUPLER   |         |
| dn          | H1          | rfp         | 9678.2  |
| dof         | 0           | lp          | -18.8   |
| dm          | yyy         | PLOT        |         |
| dmm         | w           | wc          | 250     |
| dpwr        | 37          | sc          | 0       |
| dmf         | 10582       | vs          | 70878   |
|             |             | th          | 7       |
|             |             | ai          | cdc ph  |

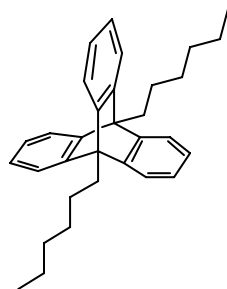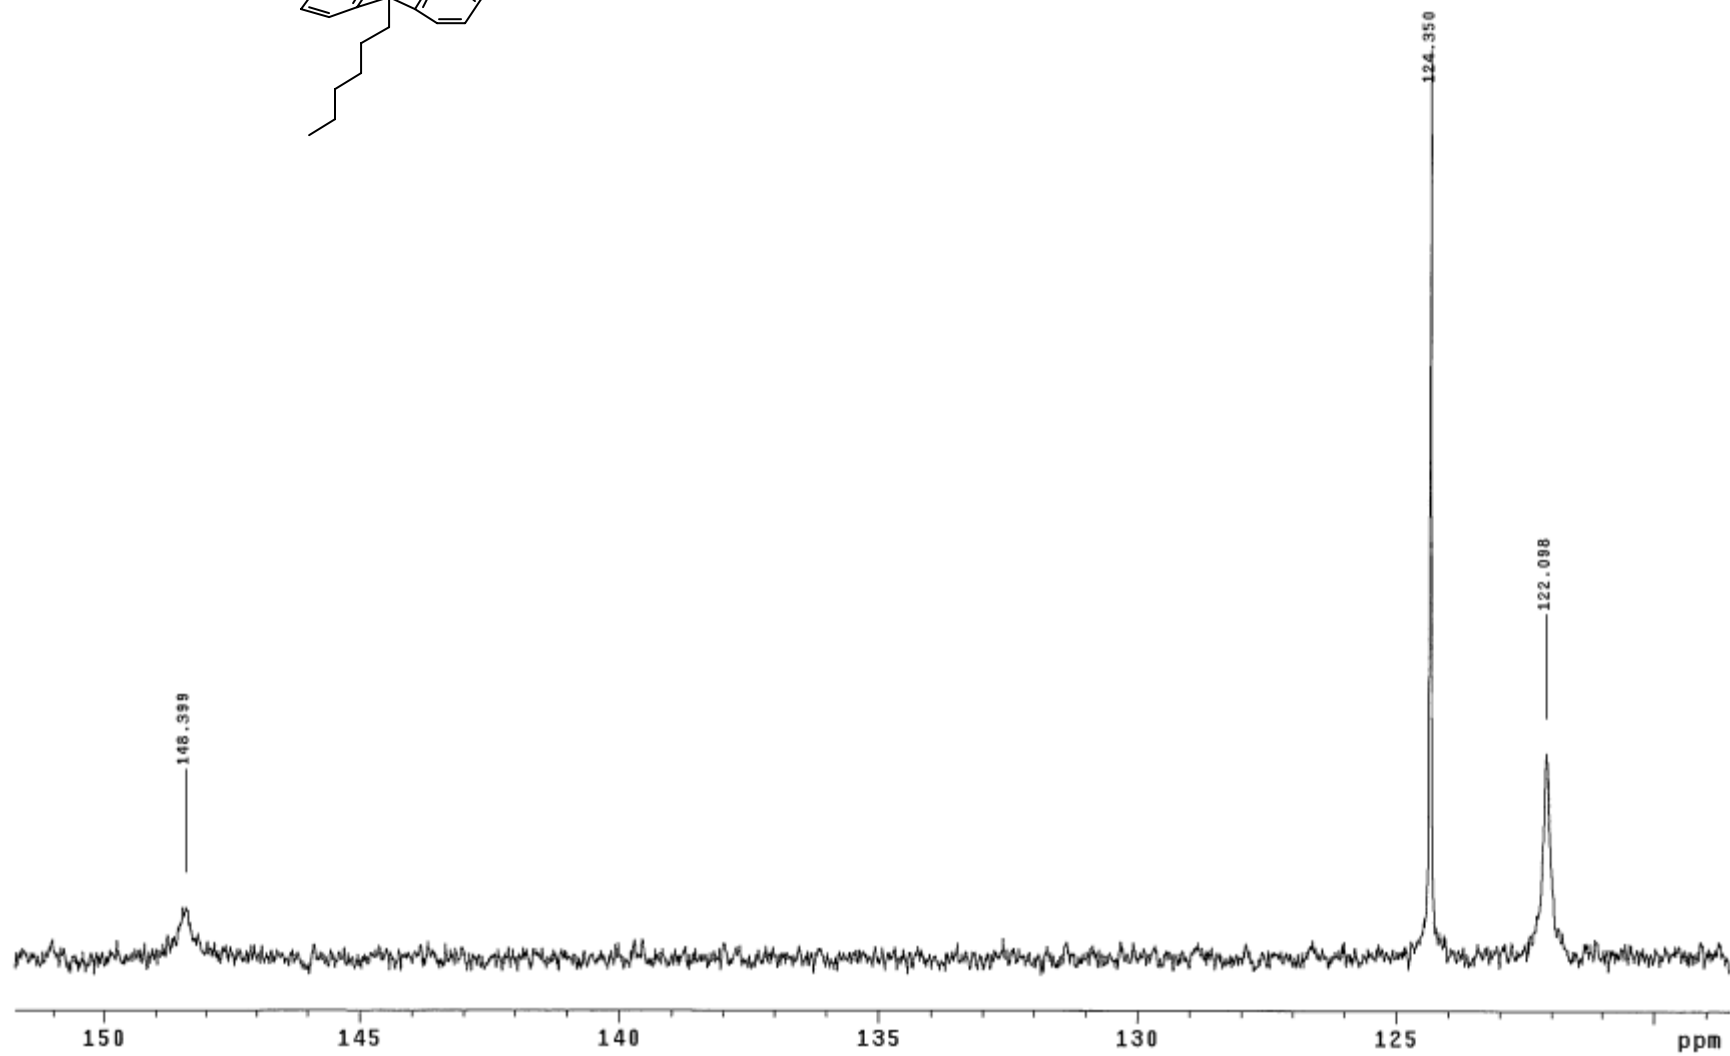

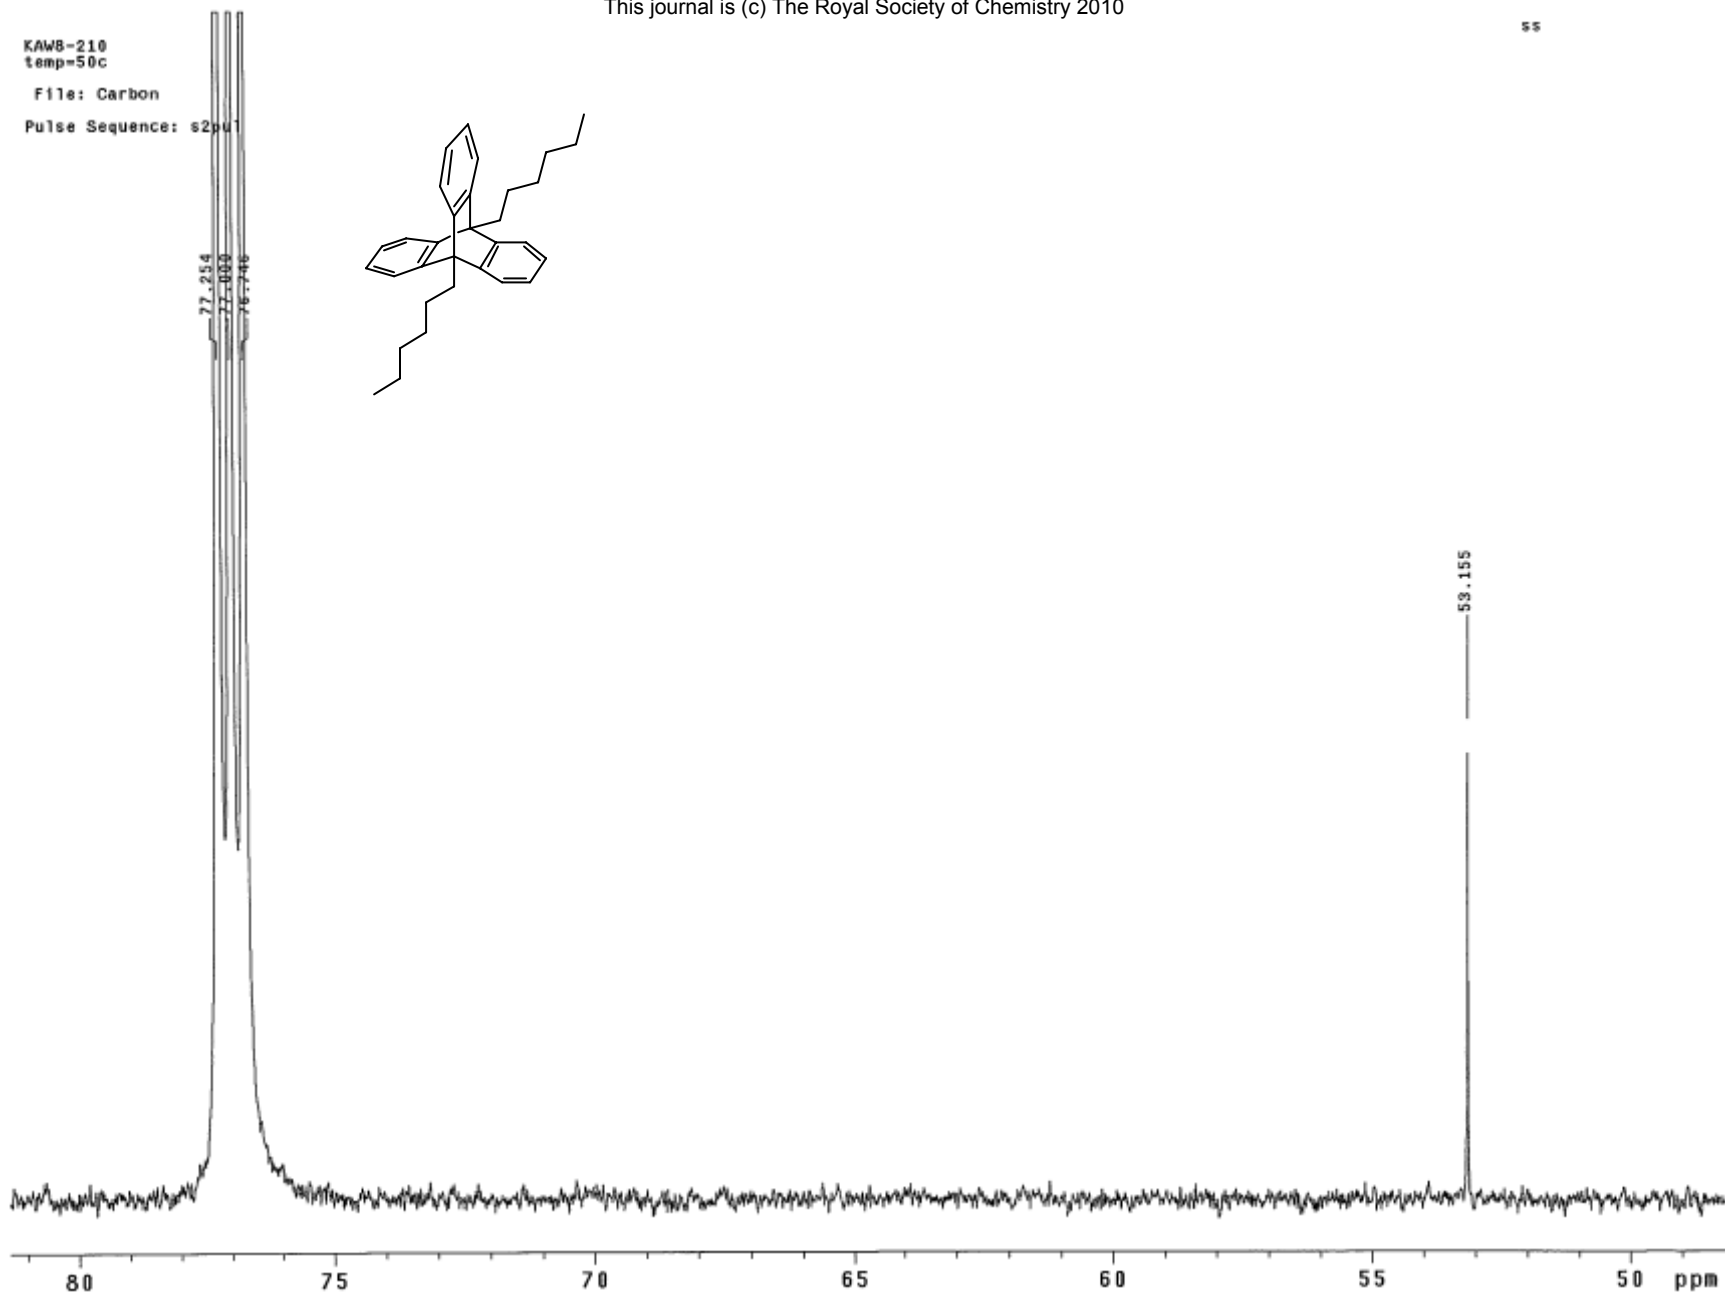

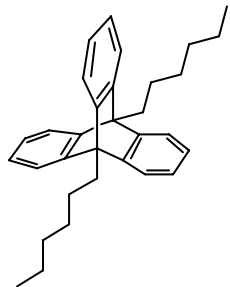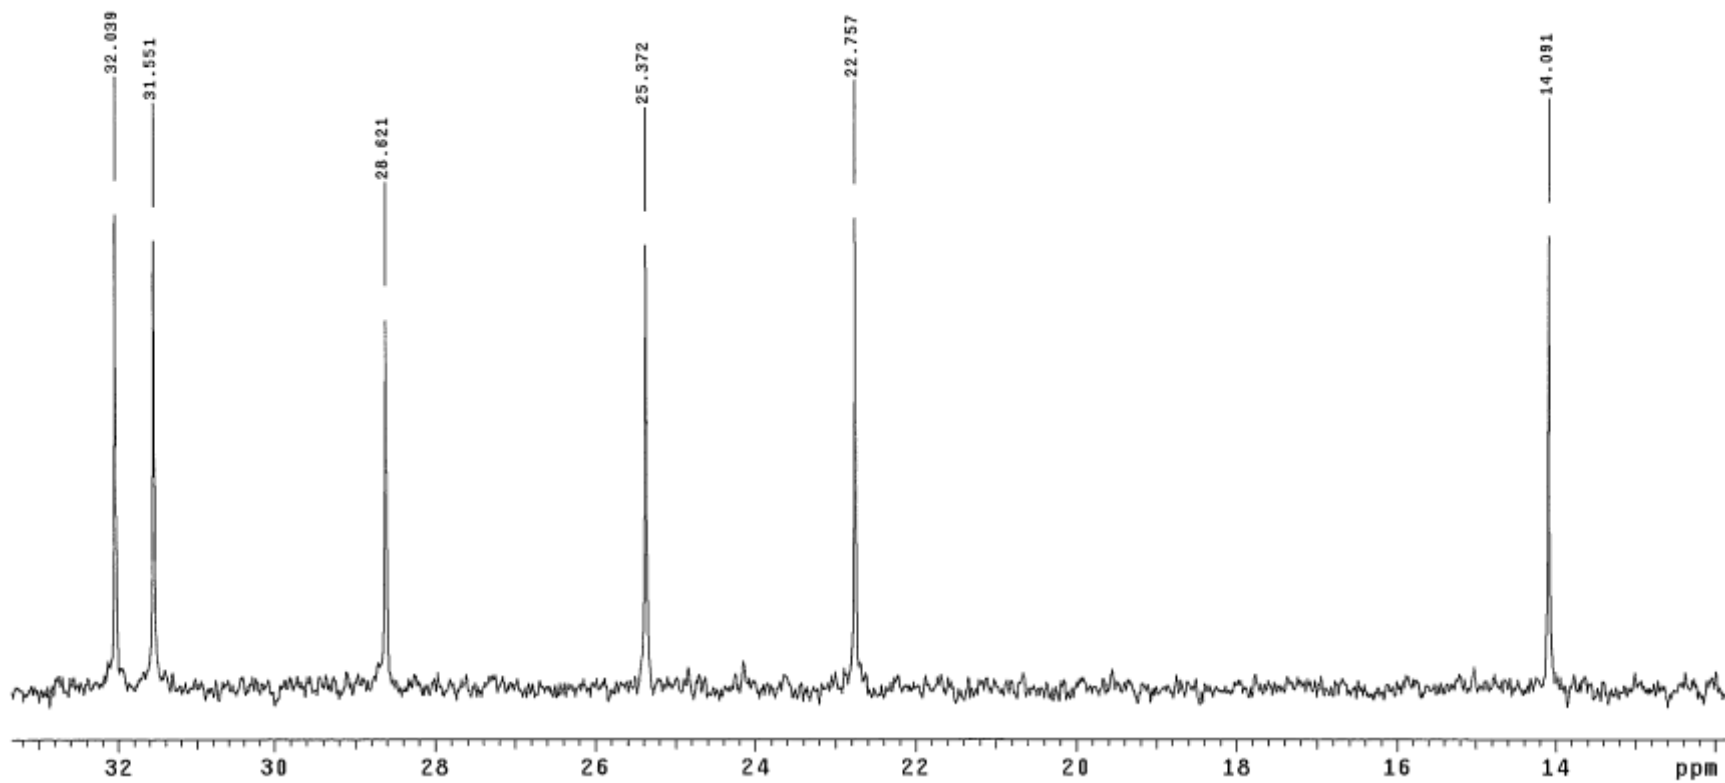

500 MHz nmr0

Supplementary Material (ESI) for Chemical Communications  
This journal is (c) The Royal Society of Chemistry 2010

KAW8-223  
temp=50c

exp1 s2pu1

| SAMPLE      |             | SPECIAL    |        |
|-------------|-------------|------------|--------|
| date        | Jan 11 2010 | temp       | 50.0   |
| solvent     | cdc13       | gain       | 30     |
| file        | exp         | spin       | 20     |
| ACQUISITION |             | SPECIAL    |        |
| sw          | 7997.6      | hst        | 0.008  |
| at          | 4.001       | pw90       | 11.000 |
| np          | 64000       | alfa       | 6.600  |
| fb          | 4000        | FLAGS      |        |
| bs          | 32          | il         | n      |
| ss          | 2           | in         | n      |
| d1          | 2.000       | dp         | y      |
| nt          | 64          | hs         | nn     |
| ct          | 64          | PROCESSING |        |
| TRANSMITTER |             | lb         | 0.10   |
| tn          | H1          | fn         | 262144 |
| DECOUPLER   |             | DISPLAY    |        |
| sfrq        | 499.868     | sp         | -250.0 |
| tof         | 499.8       | wp         | 5248.5 |
| tpwr        | 57          | rfl        | 999.6  |
| pw          | 1.833       | rfl        | 0      |
| dn          | C13         | rp         | 263.7  |
| dof         | 0           | lp         | -6.5   |
| dm          | nnn         | PLOT       |        |
| dmm         | c           | wc         | 250    |
| dpwr        | 40          | sc         | 0      |
| dmf         | 14285       | vs         | 172    |
|             |             | th         | 12     |
|             |             | ai         | cdc ph |

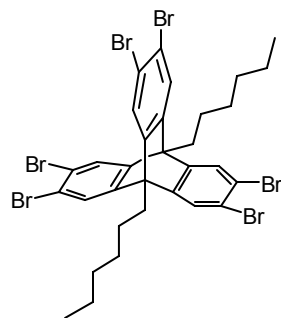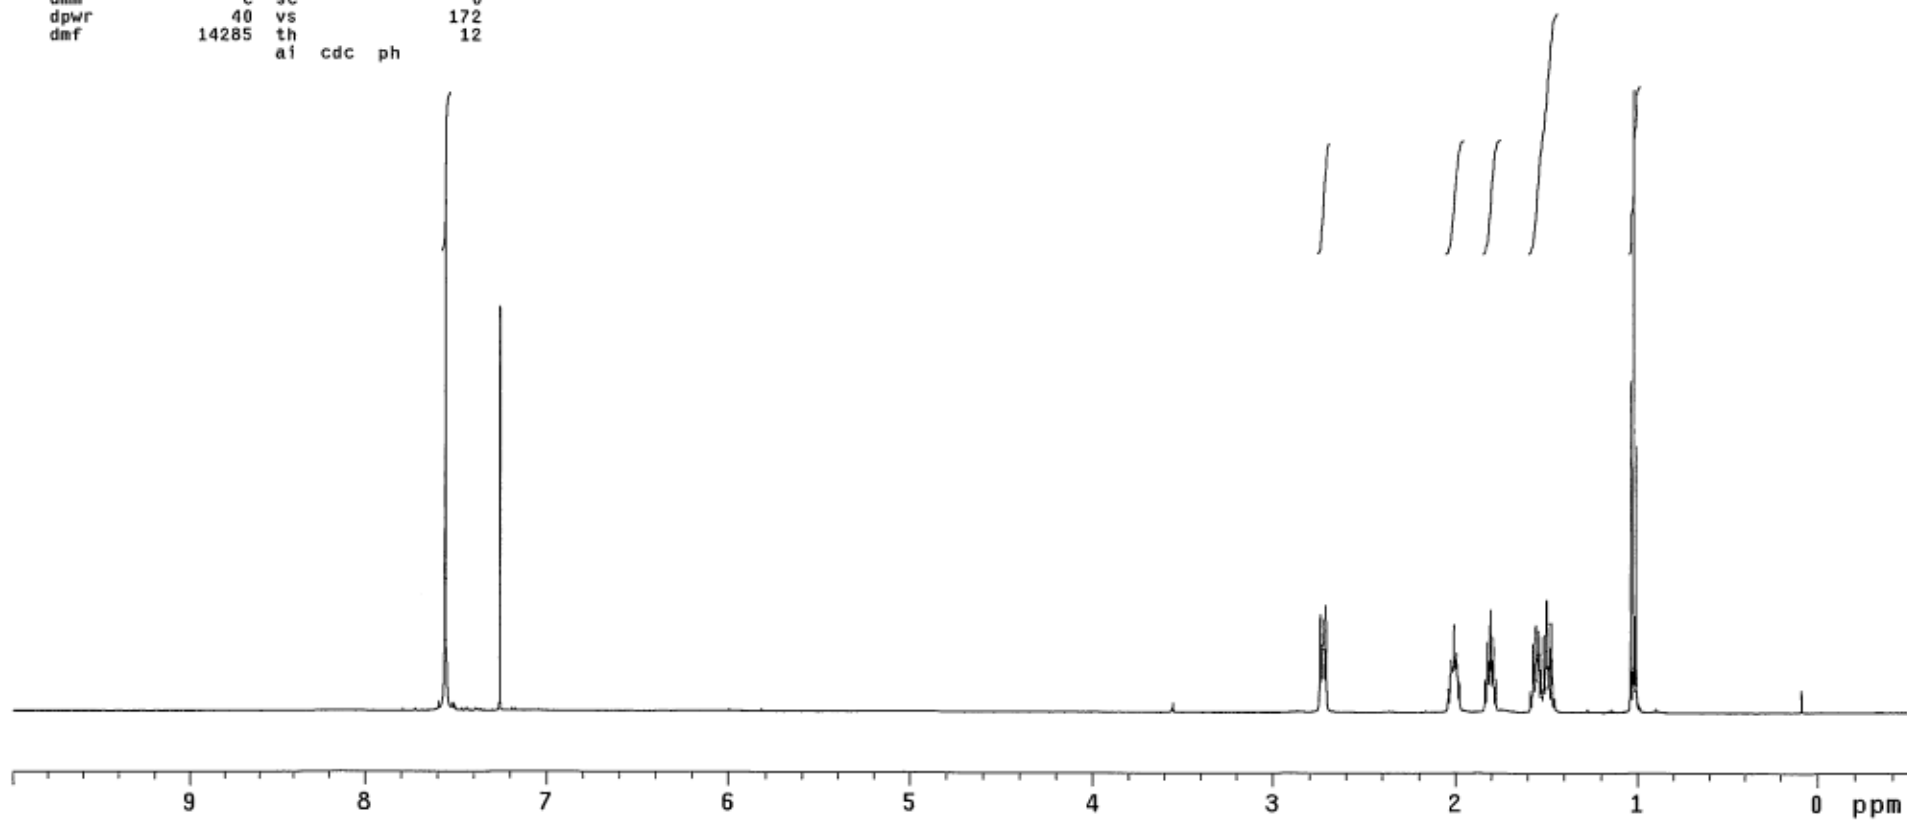

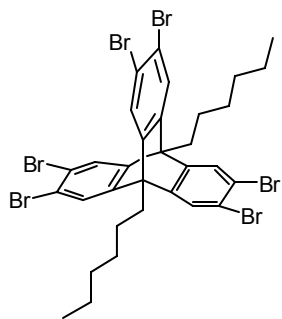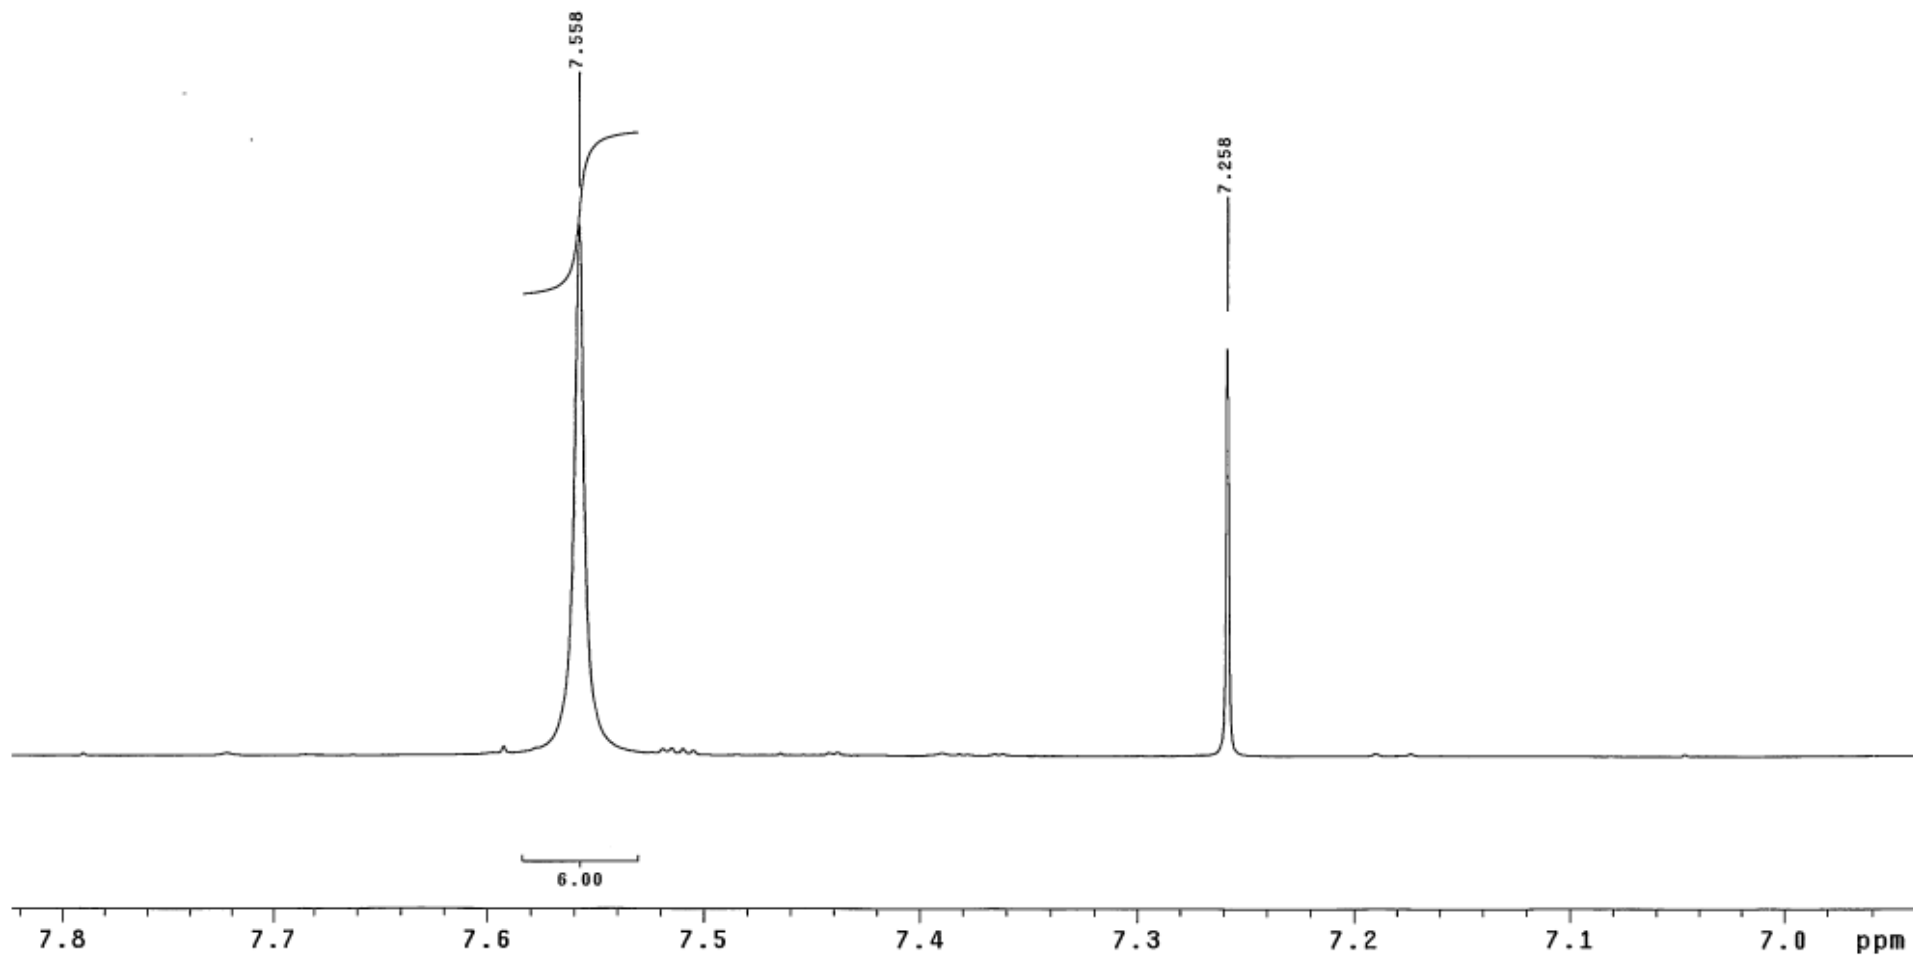

KAW8-223  
temp=50c

File: PROTON

Pulse Sequence: s2pu1

Supplementary Material (ESI) for Chemical Communications  
This journal is (c) The Royal Society of Chemistry 2010

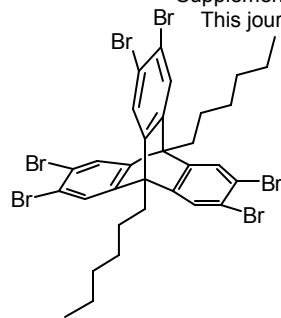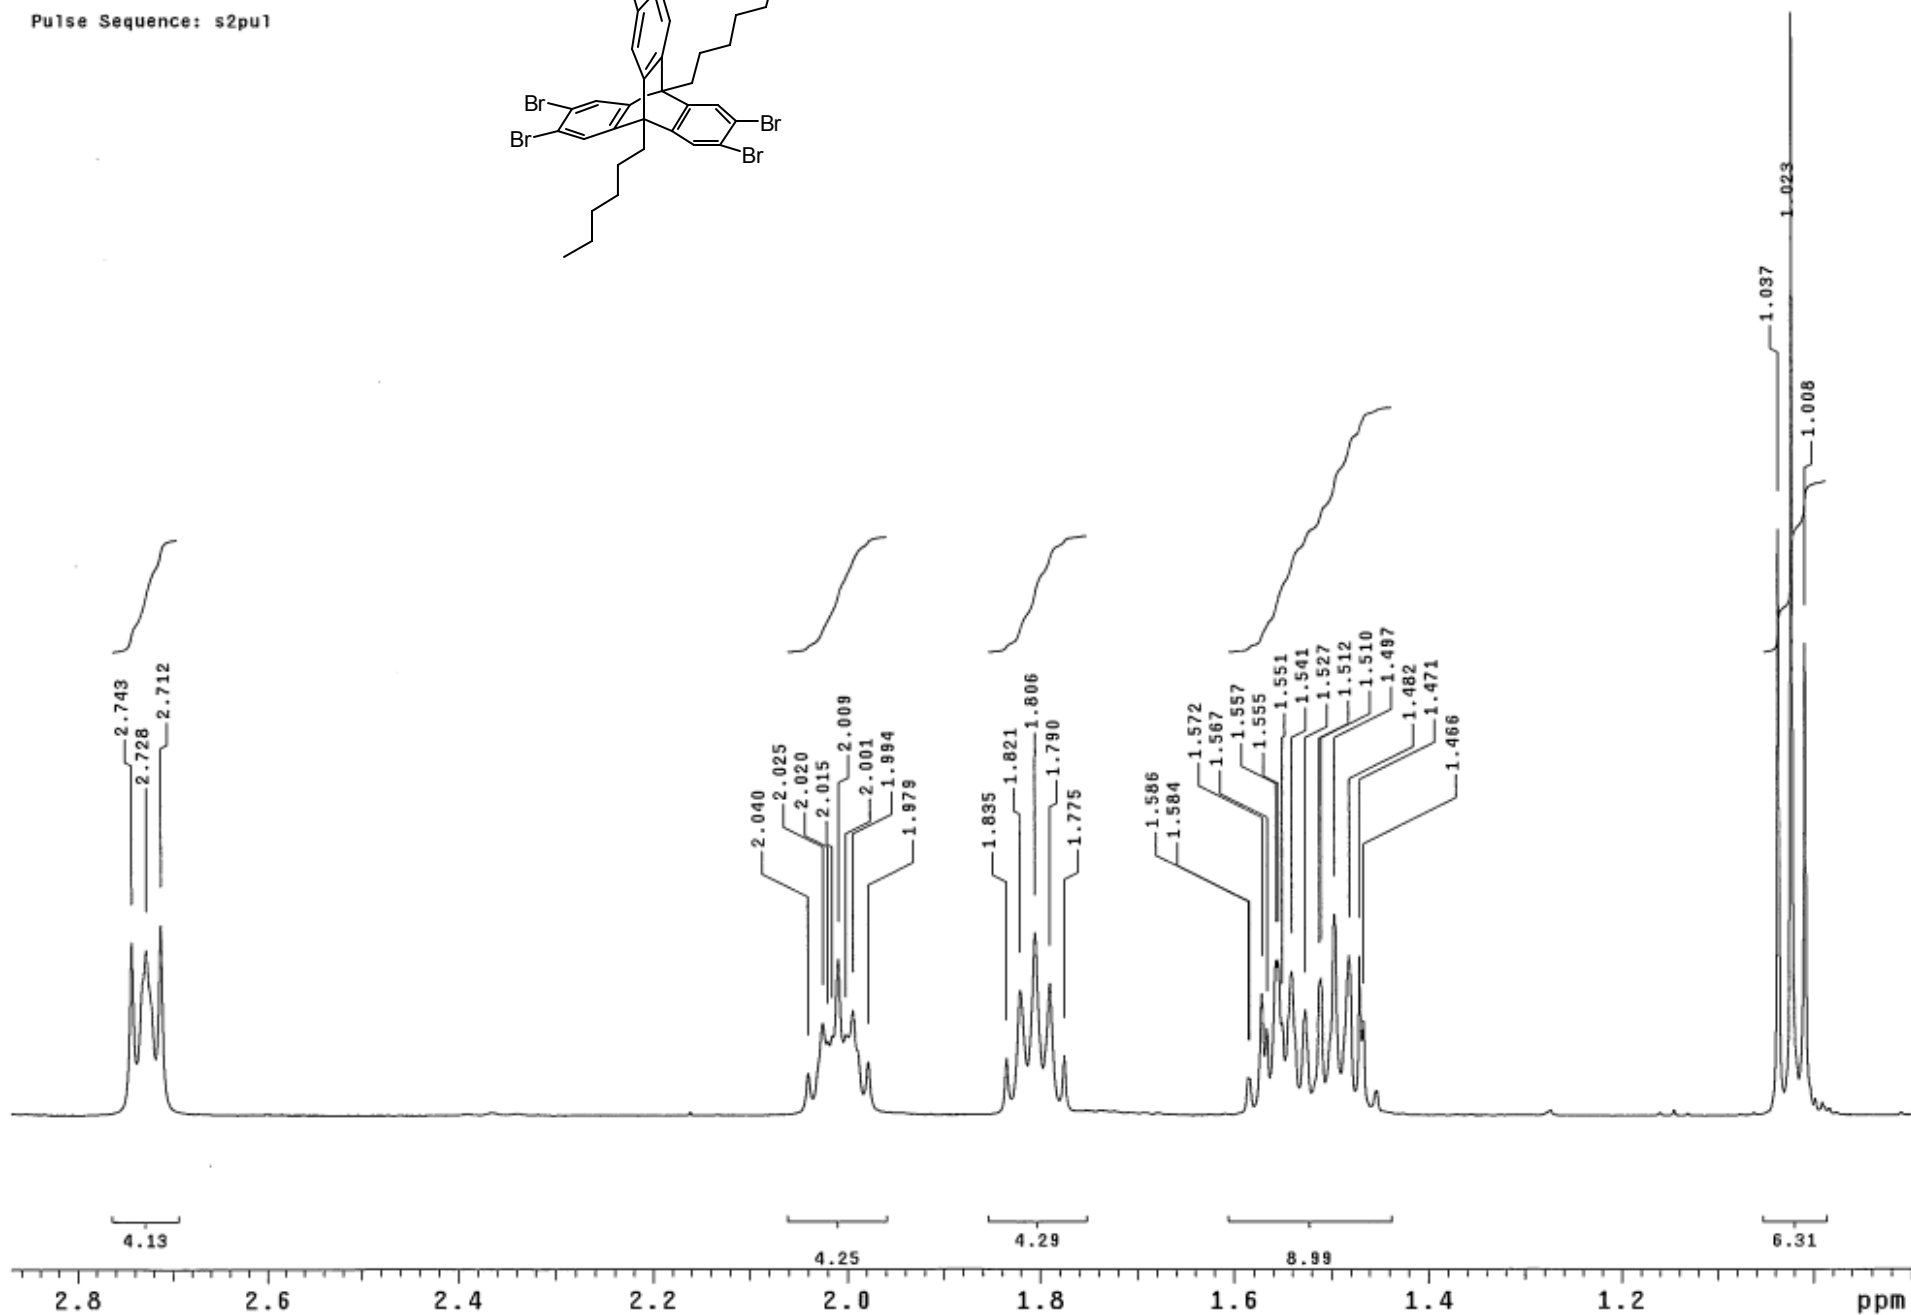

500 MHz nmr0

KAW8-223  
temp=50c

exp4 Carbon

| SAMPLE      |             | SPECIAL    |         |
|-------------|-------------|------------|---------|
| date        | Jan 11 2010 | temp       | 50.0    |
| solvent     | cdc13       | gain       | 40      |
| file        | exp         | spin       | 20      |
| ACQUISITION |             | SPECIAL    |         |
| sw          | 32679.7     | hst        | 0.008   |
| at          | 1.958       | pw90       | 9.500   |
| np          | 128000      | alfa       | 10.000  |
| fb          | 18000       | FLAGS      |         |
| bs          | 16          | il         | n       |
| d1          | 2.000       | in         | n       |
| nt          | 15000       | dp         | y       |
| ct          | 3020        | hs         | nn      |
| TRANSMITTER |             | PROCESSING |         |
| tn          | C13         | lb         | 2.00    |
| sfrq        | 125.705     | fn         | 262144  |
| tof         | 1883.9      | DISPLAY    |         |
| tpwr        | 53          | sp         | -628.5  |
| pw          | 3.163       | wp         | 25766.7 |
| DECOUPLER   |             | rf1        | 12211.8 |
| dn          | H1          | rfp        | 9678.2  |
| dof         | 0           | rp         | -17.9   |
| dm          | yyy         | lp         | -223.0  |
|             |             | PLOT       |         |
| dmm         | w           | wc         | 250     |
| dpwr        | 37          | sc         | 0       |
| dmf         | 10582       | vs         | 33271   |
|             |             | th         | 7       |
|             |             | ai         | cdc ph  |

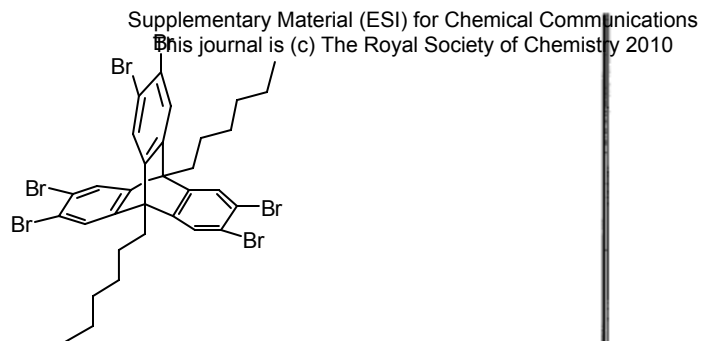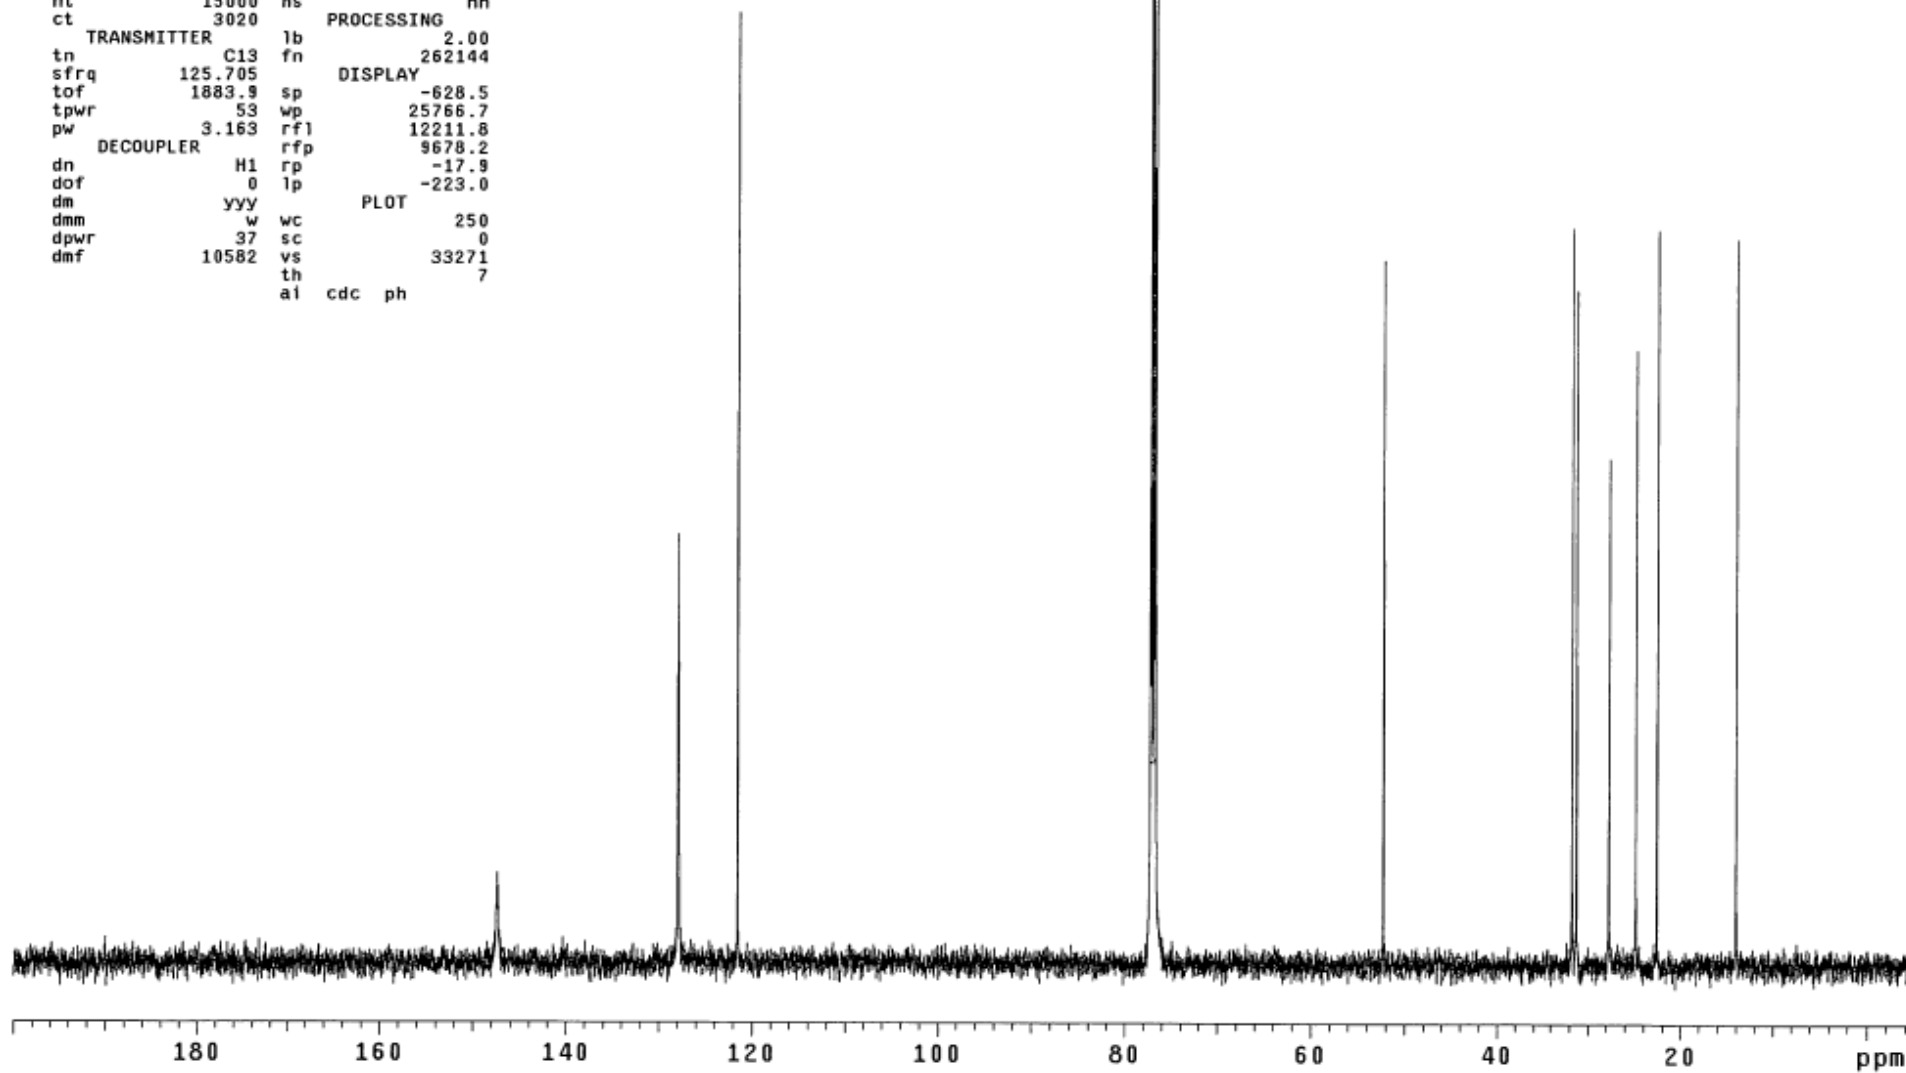



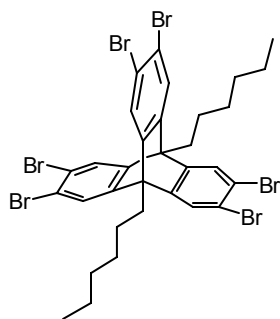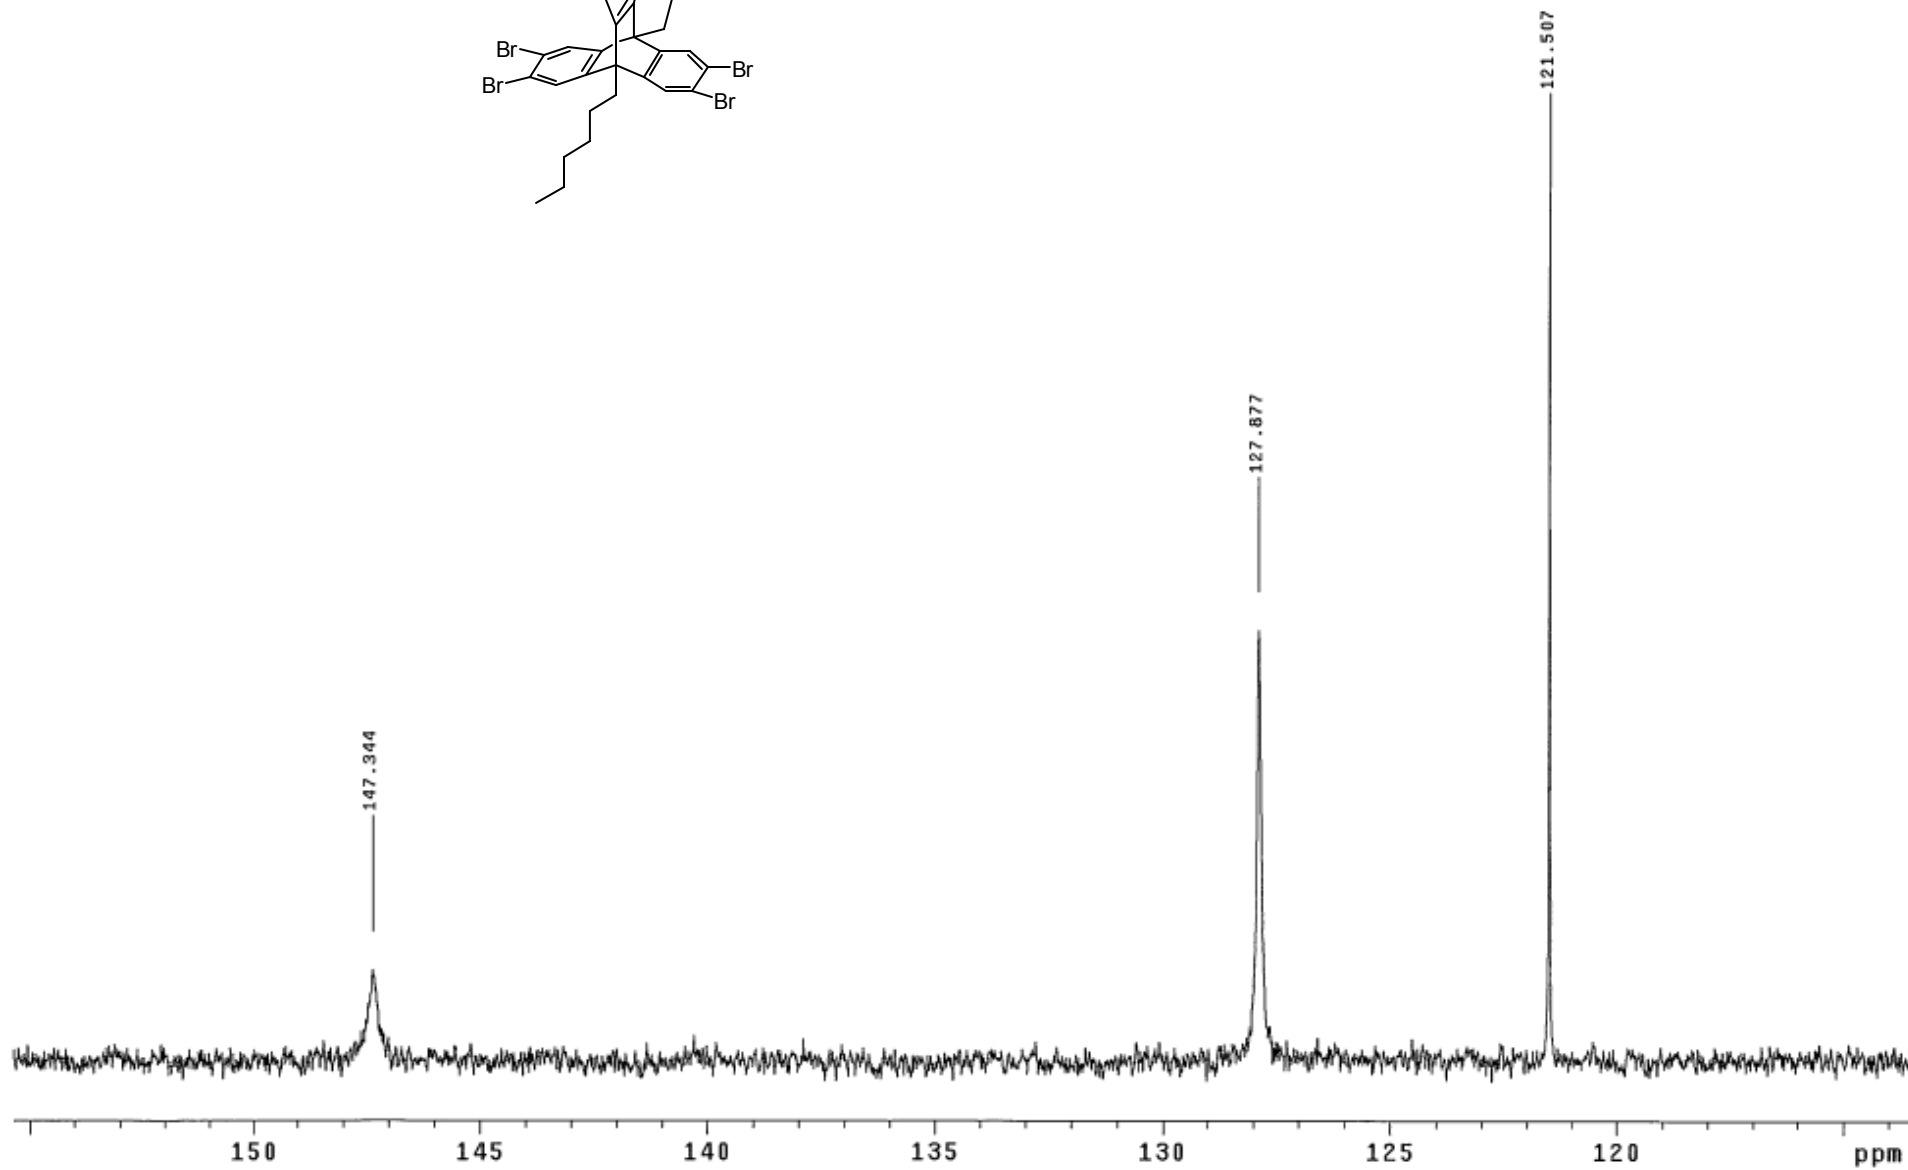

C13

File: Carbon

Pulse Sequence: s2pu

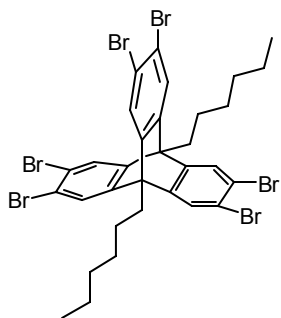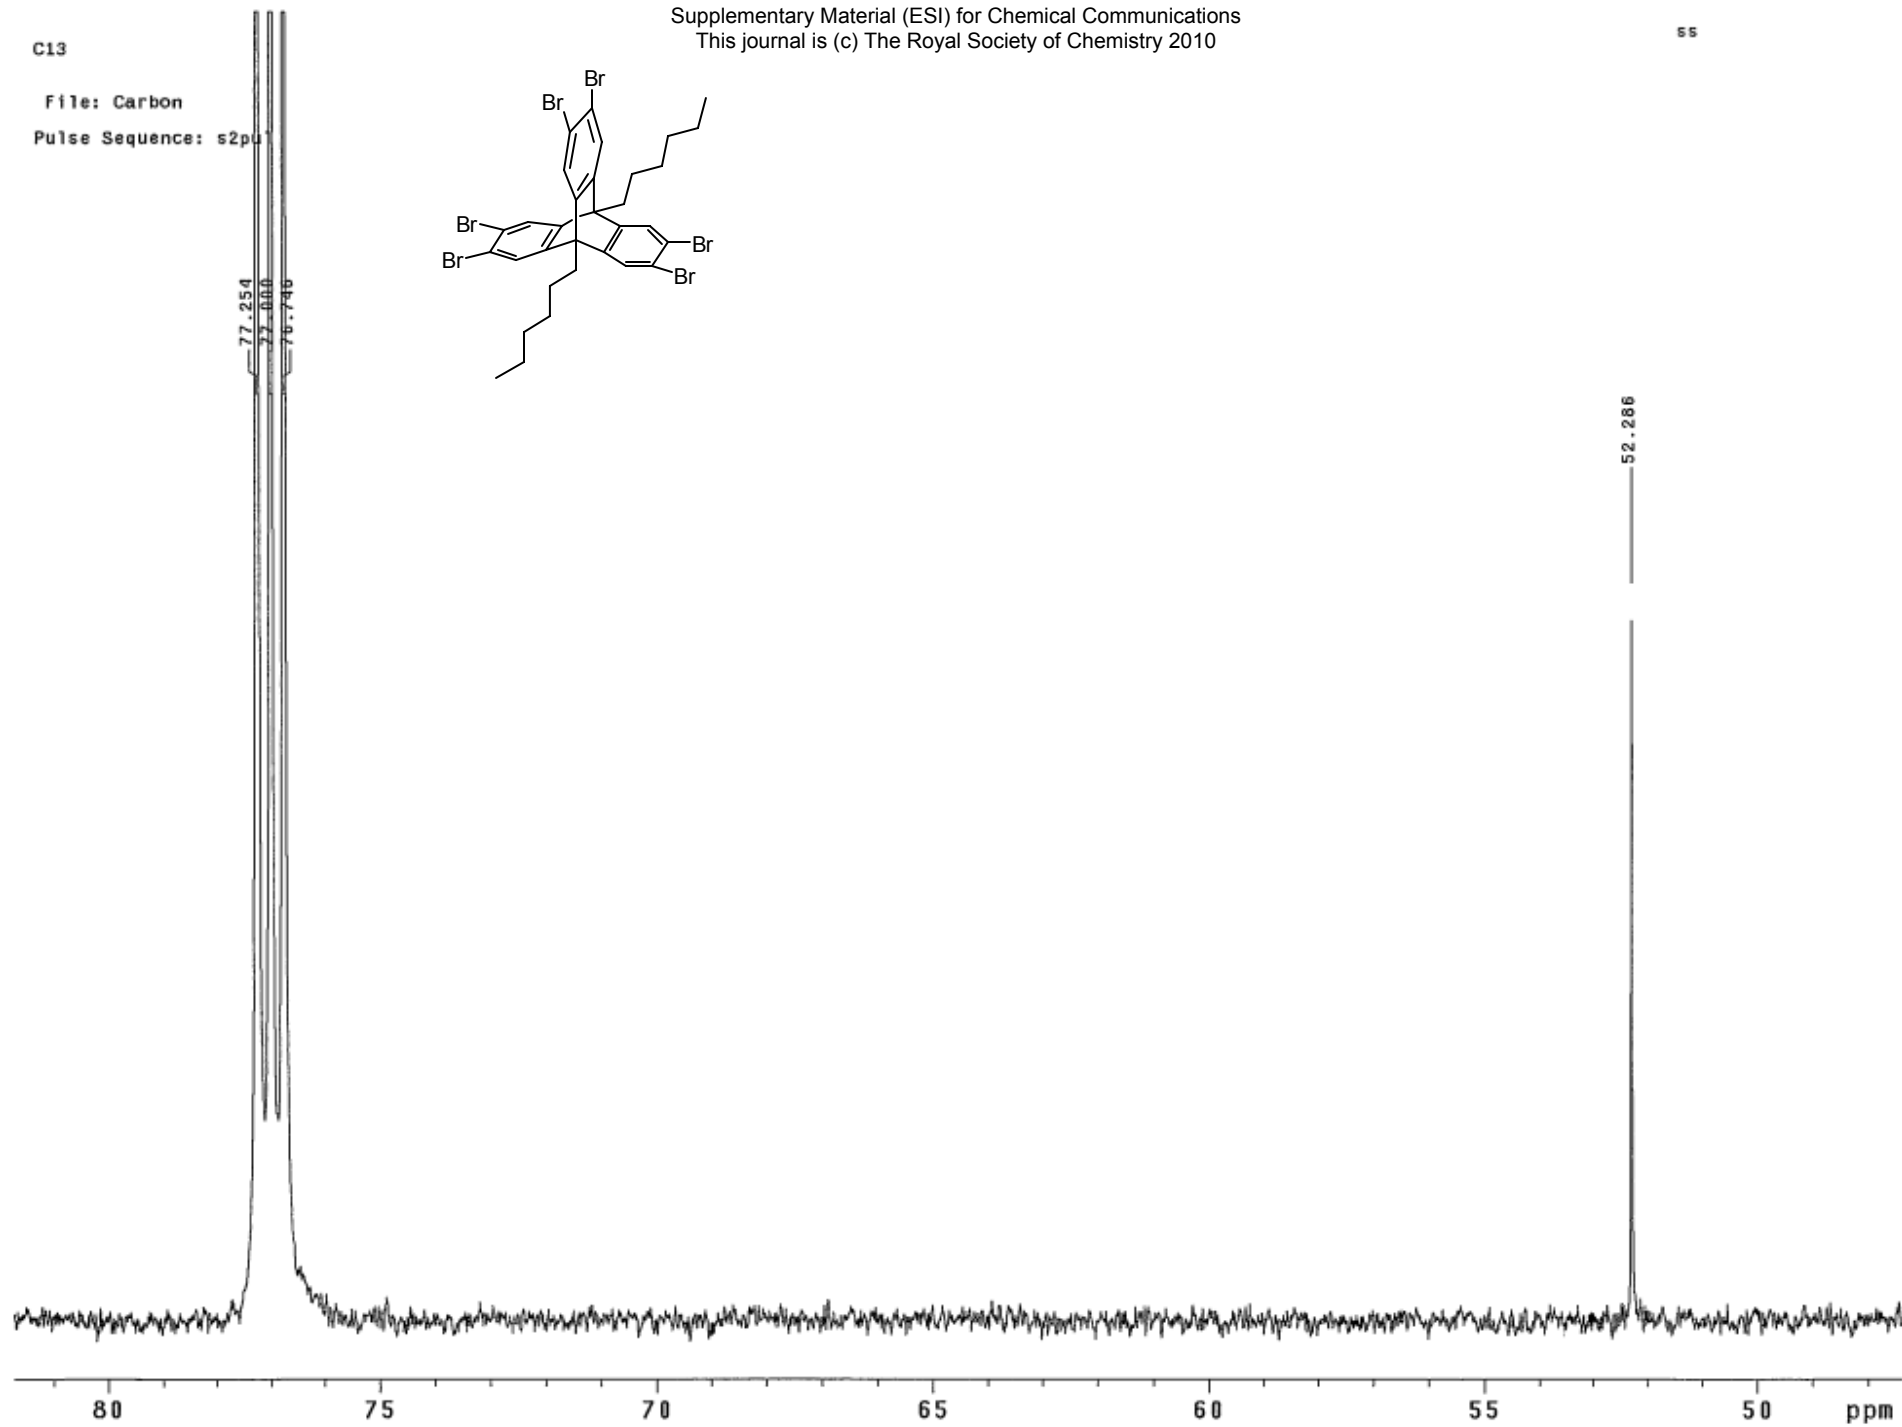

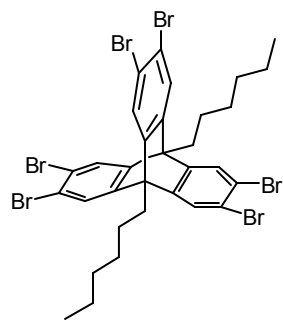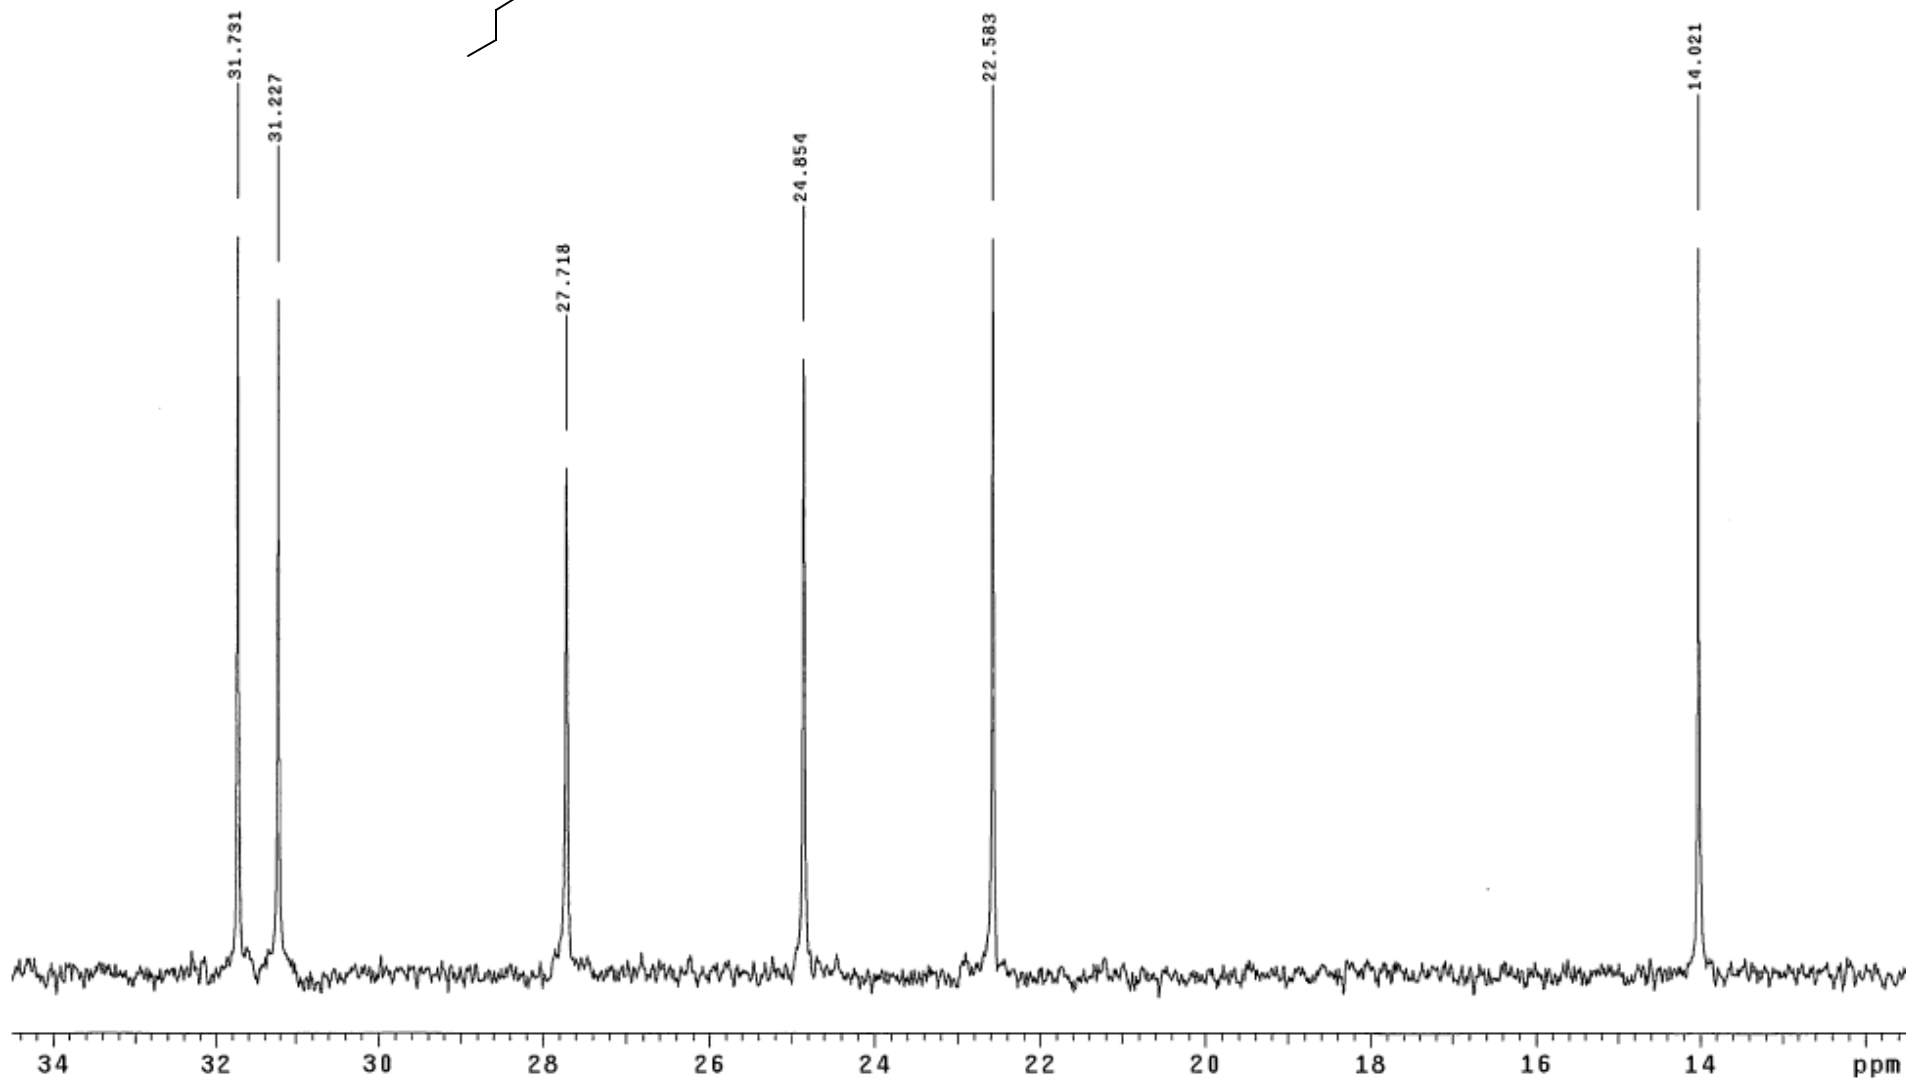

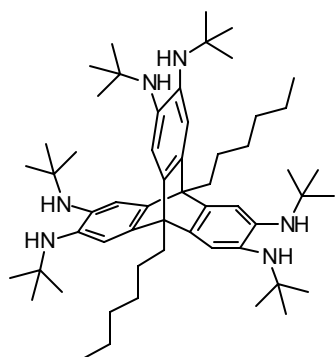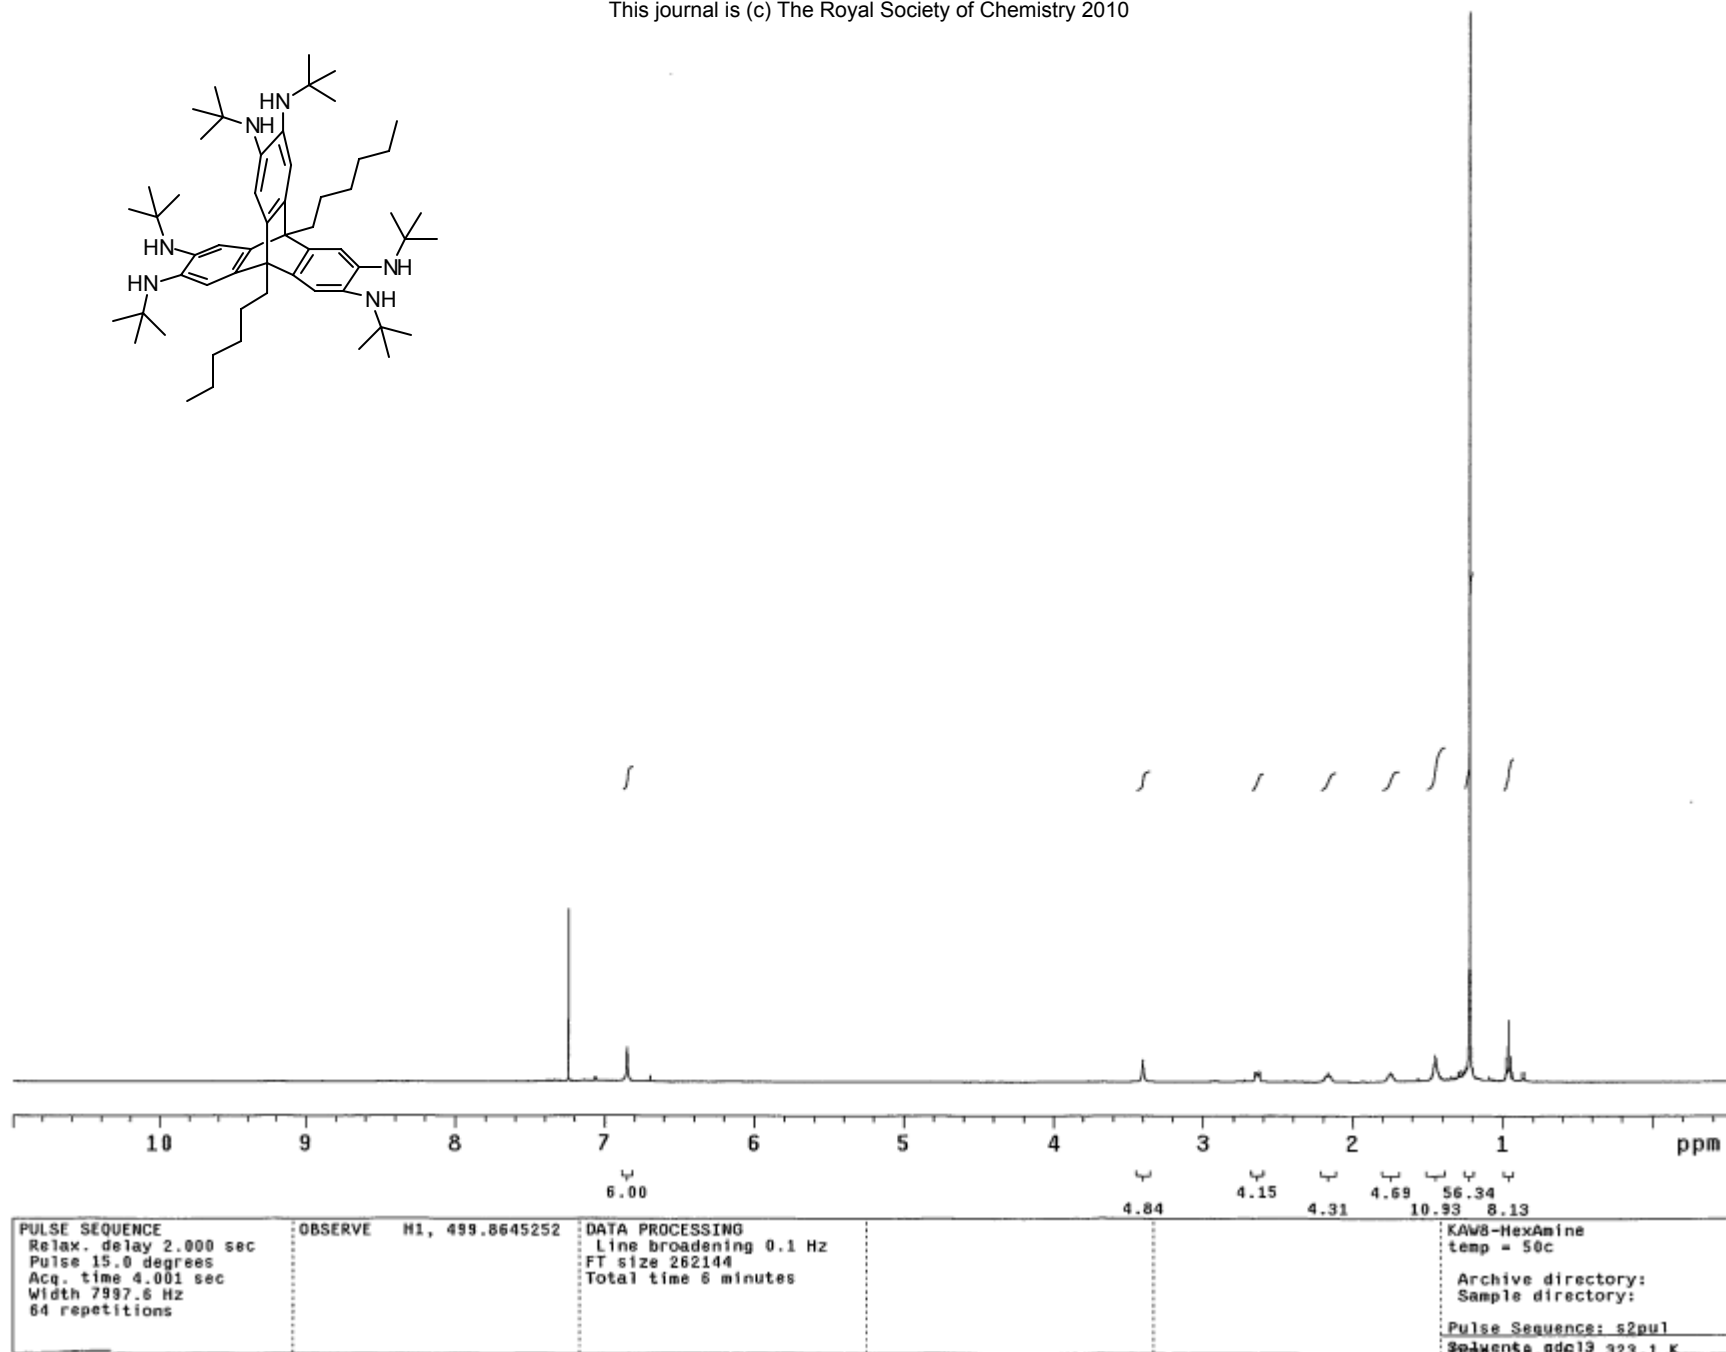

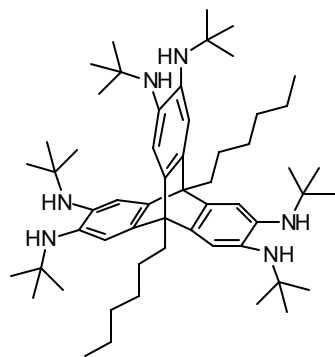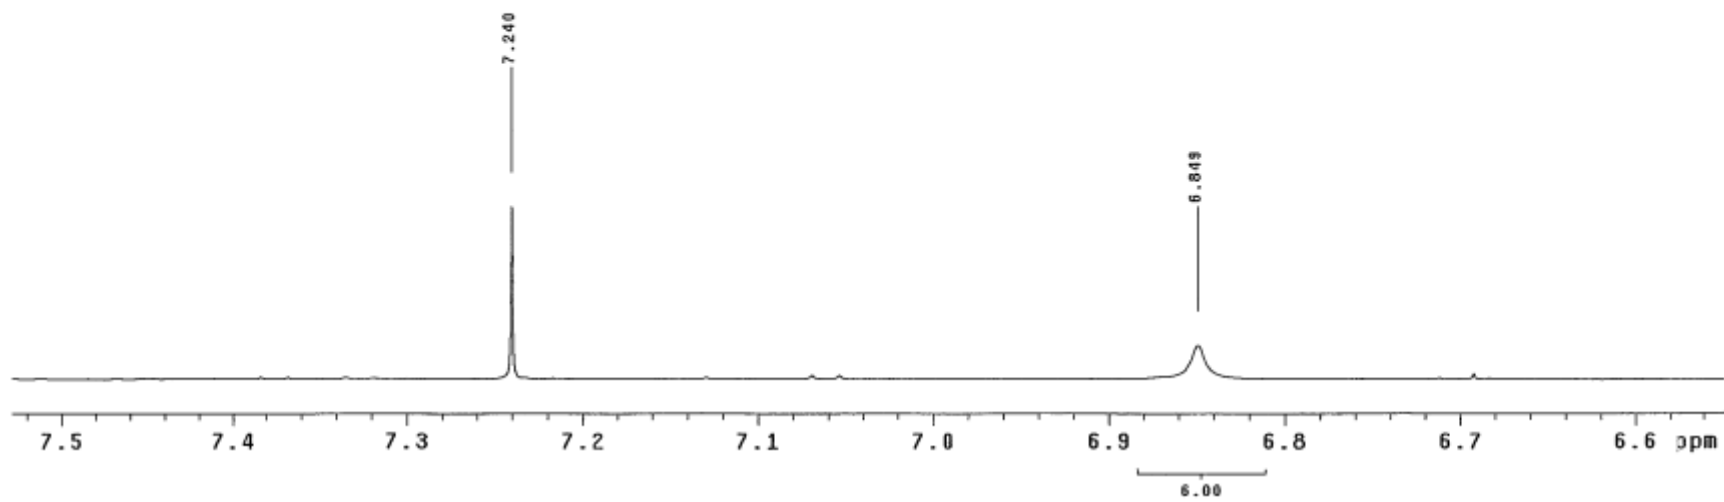

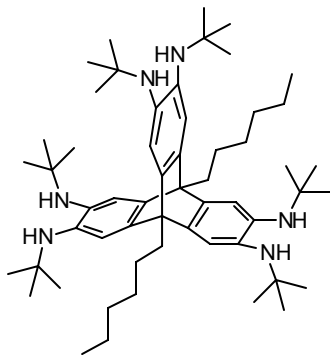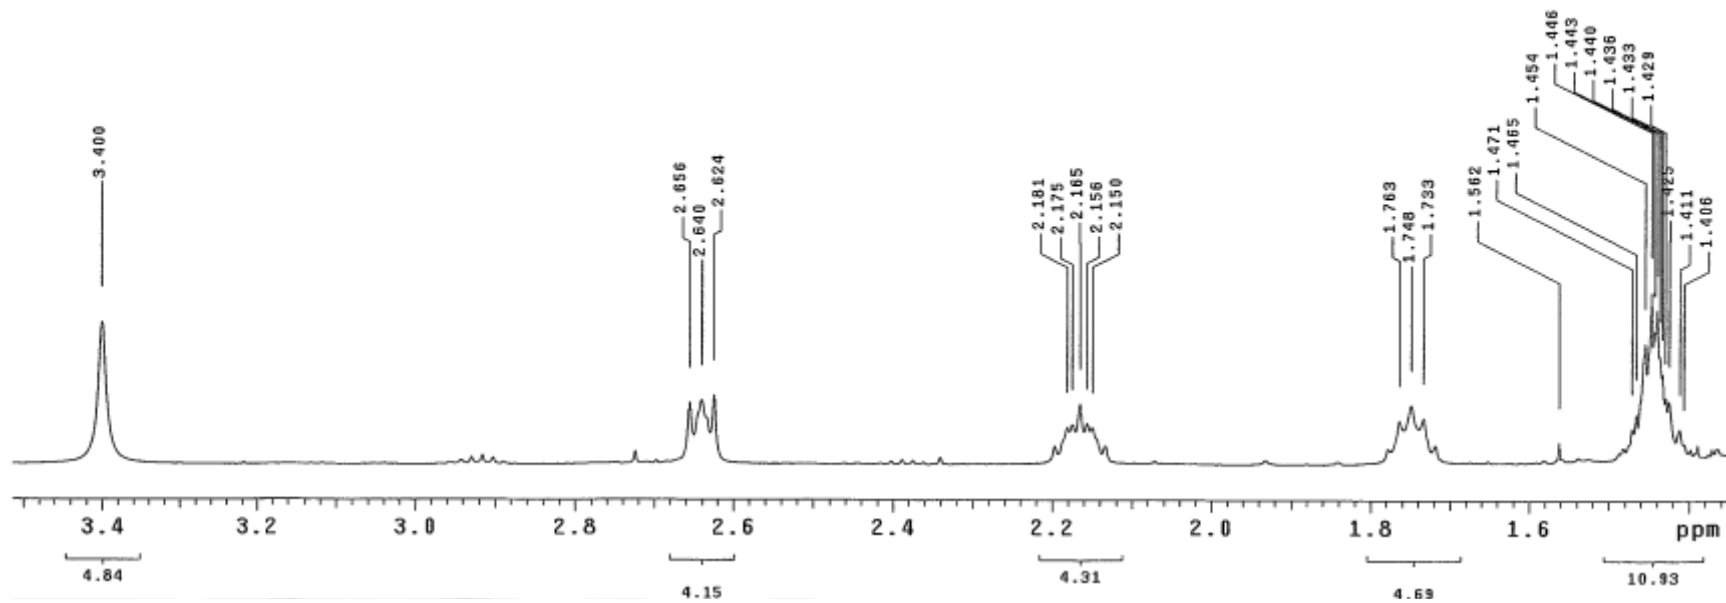

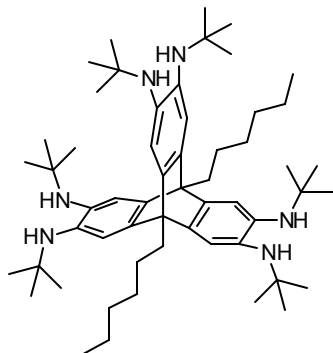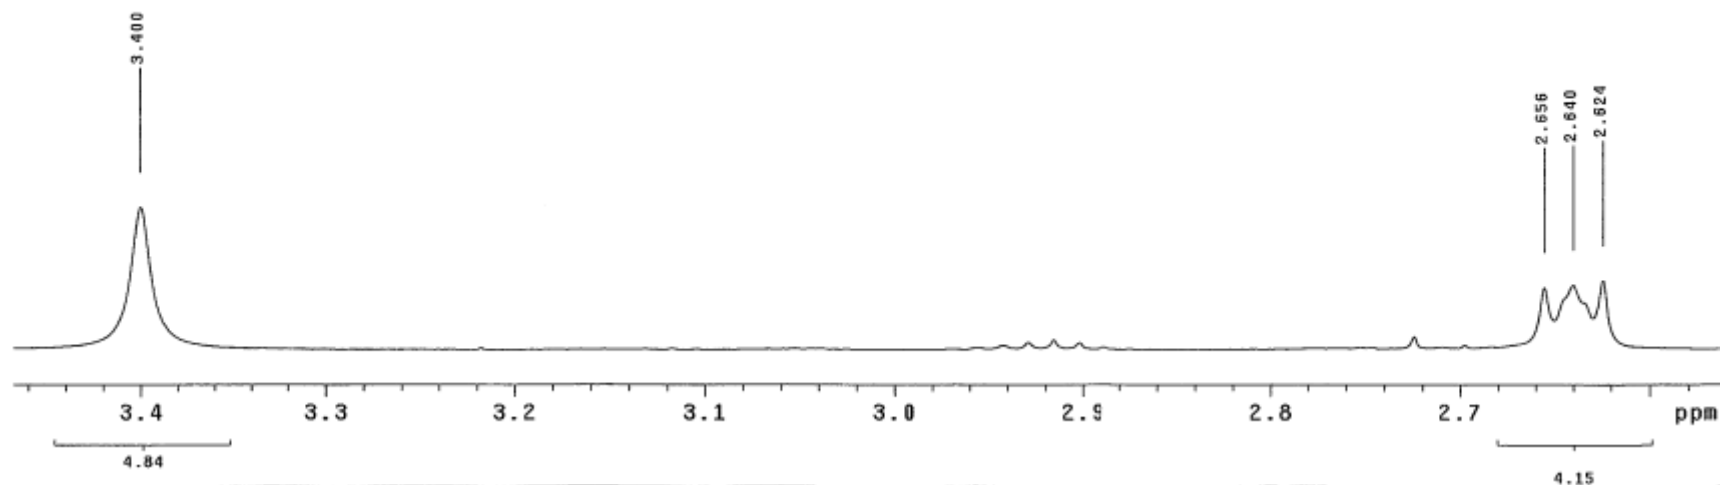

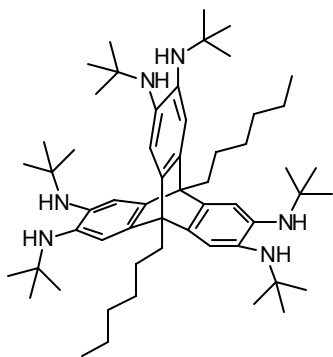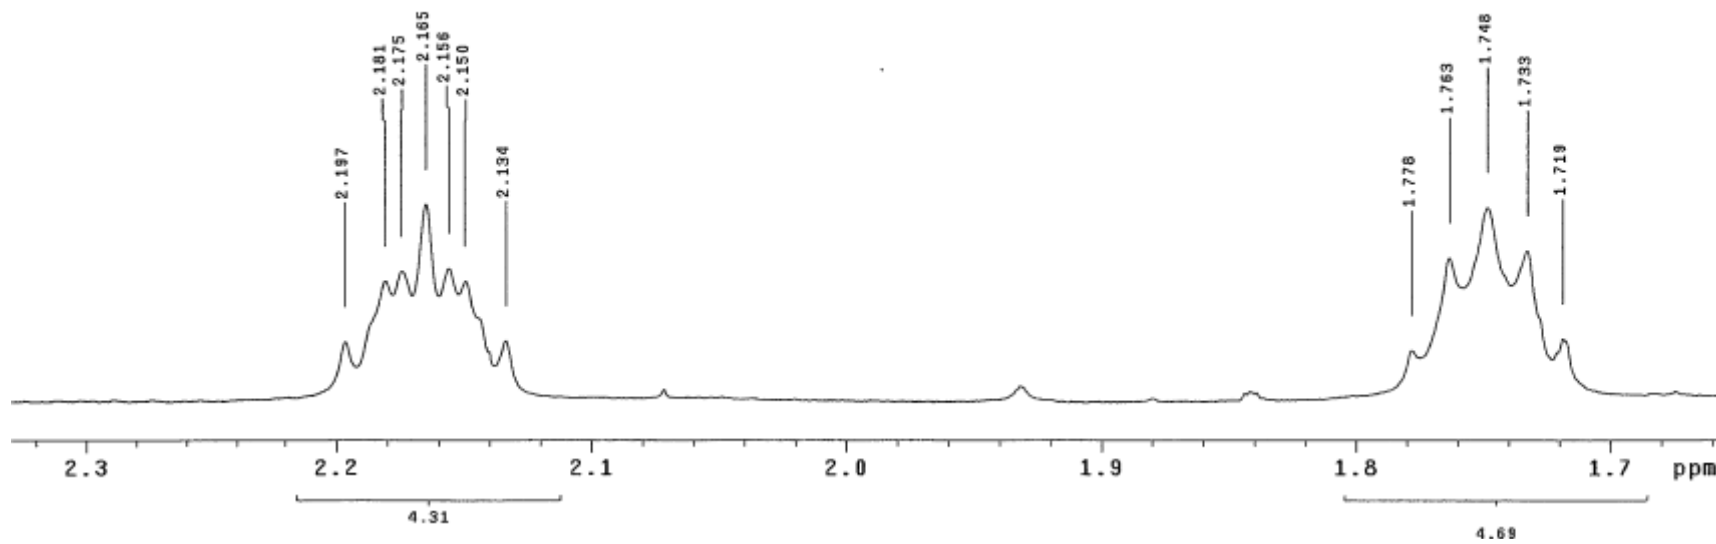



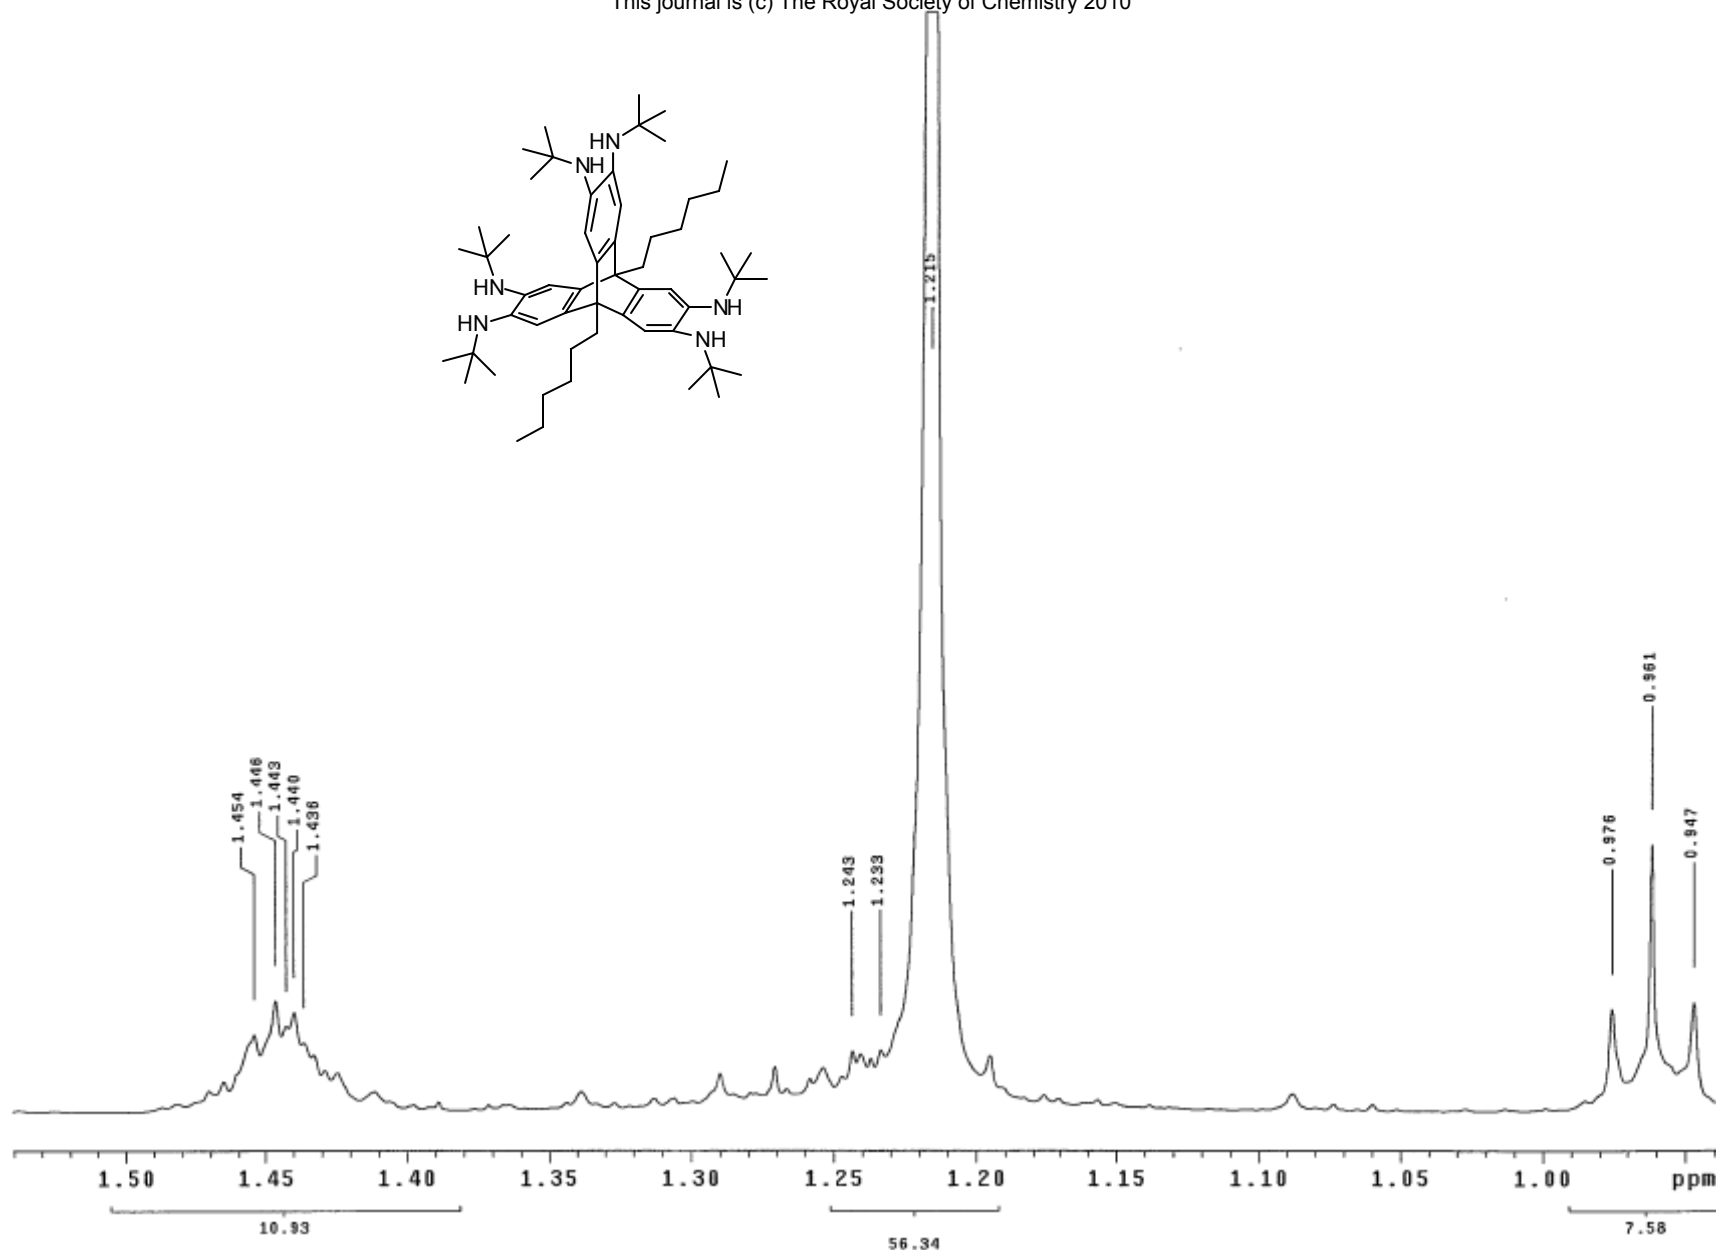

500 MHz nmr0

KAV8-225  
temp=50c

exp4 Carbon

| SAMPLE      |             | SPECIAL    |         |
|-------------|-------------|------------|---------|
| date        | Jan 14 2010 | temp       | 50.0    |
| solvent     | cdcl3       | gain       | 40      |
| file        | exp         | spin       | 20      |
| ACQUISITION |             |            |         |
| sw          | 32679.7     | hst        | 0.008   |
| at          | 1.958       | pw90       | 9.500   |
| np          | 128000      | alfa       | 10.000  |
| fb          | 18000       | FLAGS      |         |
| bs          | 32          | il         | n       |
| d1          | 2.000       | in         | n       |
| nt          | 15000       | dp         | y       |
| ct          | 3273        | hs         | nn      |
| TRANSMITTER |             | PROCESSING |         |
| tn          | C13         | lb         | 10.00   |
| sfrq        | 125.705     | fn         | 262144  |
| tof         | 1883.9      | DISPLAY    |         |
| tpwr        | 53          | sp         | -628.5  |
| pw          | 3.163       | wp         | 25766.7 |
| DECOUPLER   |             | rfl        | 12211.8 |
| dn          | H1          | rfd        | 9678.2  |
| dof         | 0           | rp         | -17.2   |
| dm          | yyy         | lp         | -221.6  |
|             |             | PLOT       |         |
| dnn         | w           | wc         | 250     |
| dpwr        | 37          | sc         | 0       |
| dnf         | 10582       | vs         | 43983   |
|             |             | th         | 9       |
|             |             | ai         | cdc ph  |

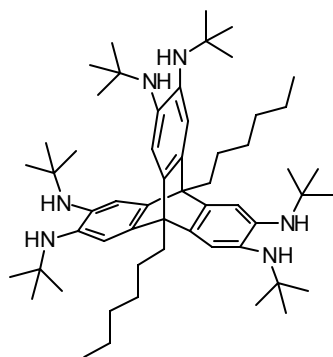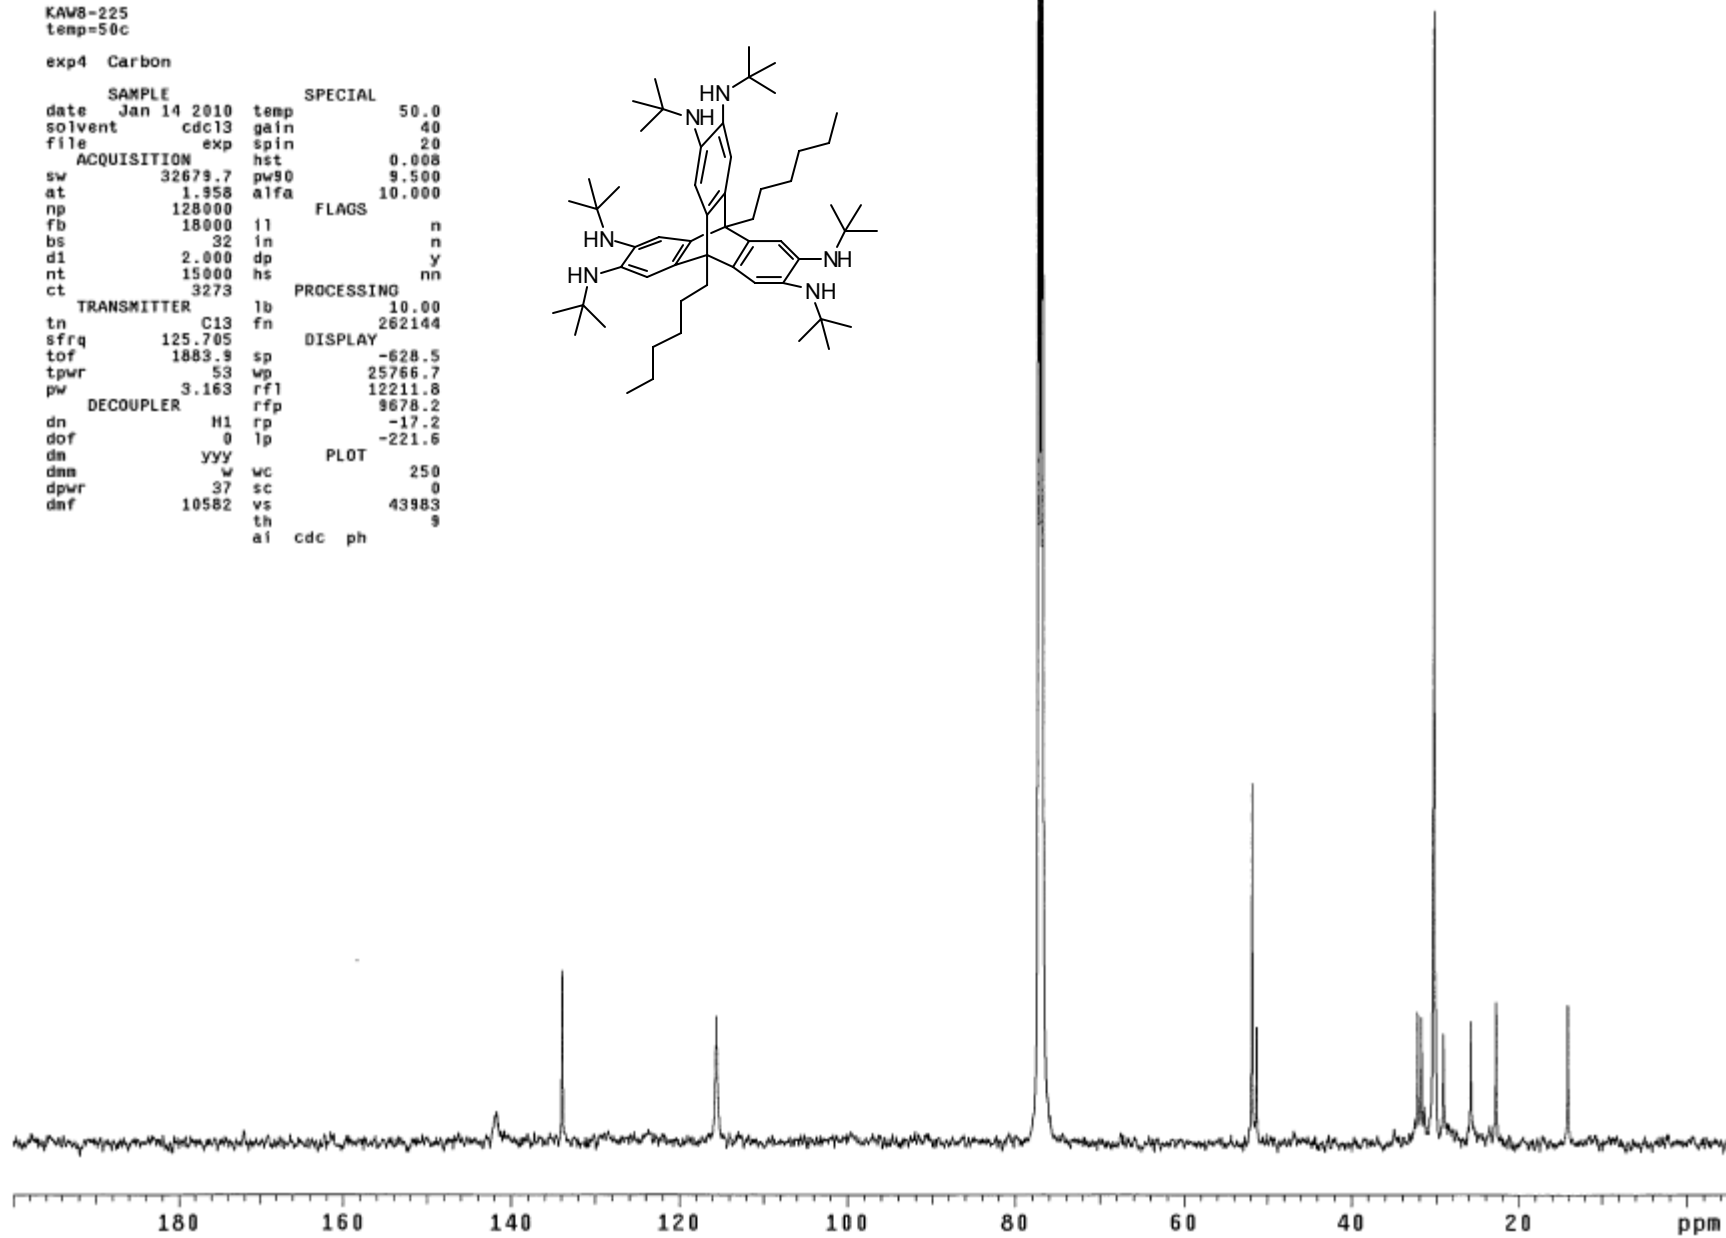

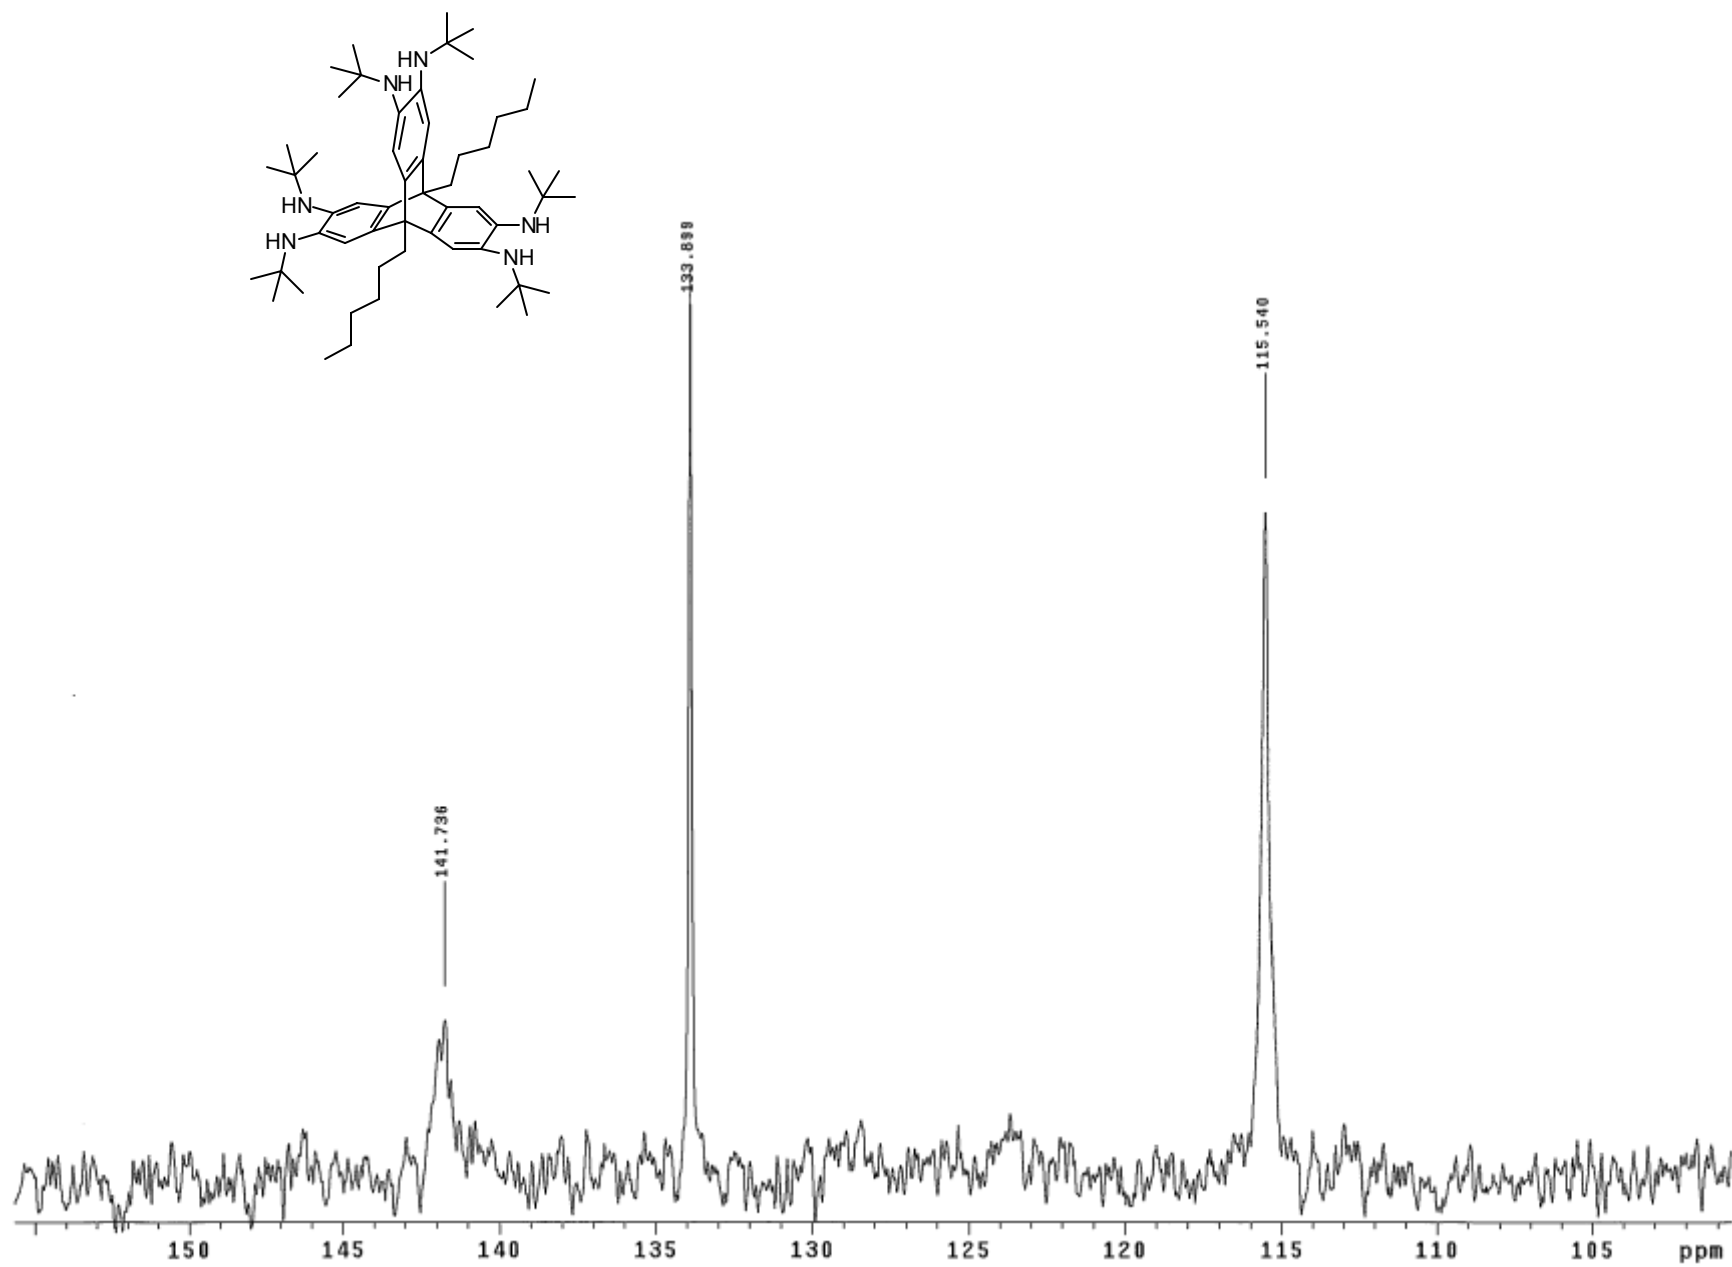

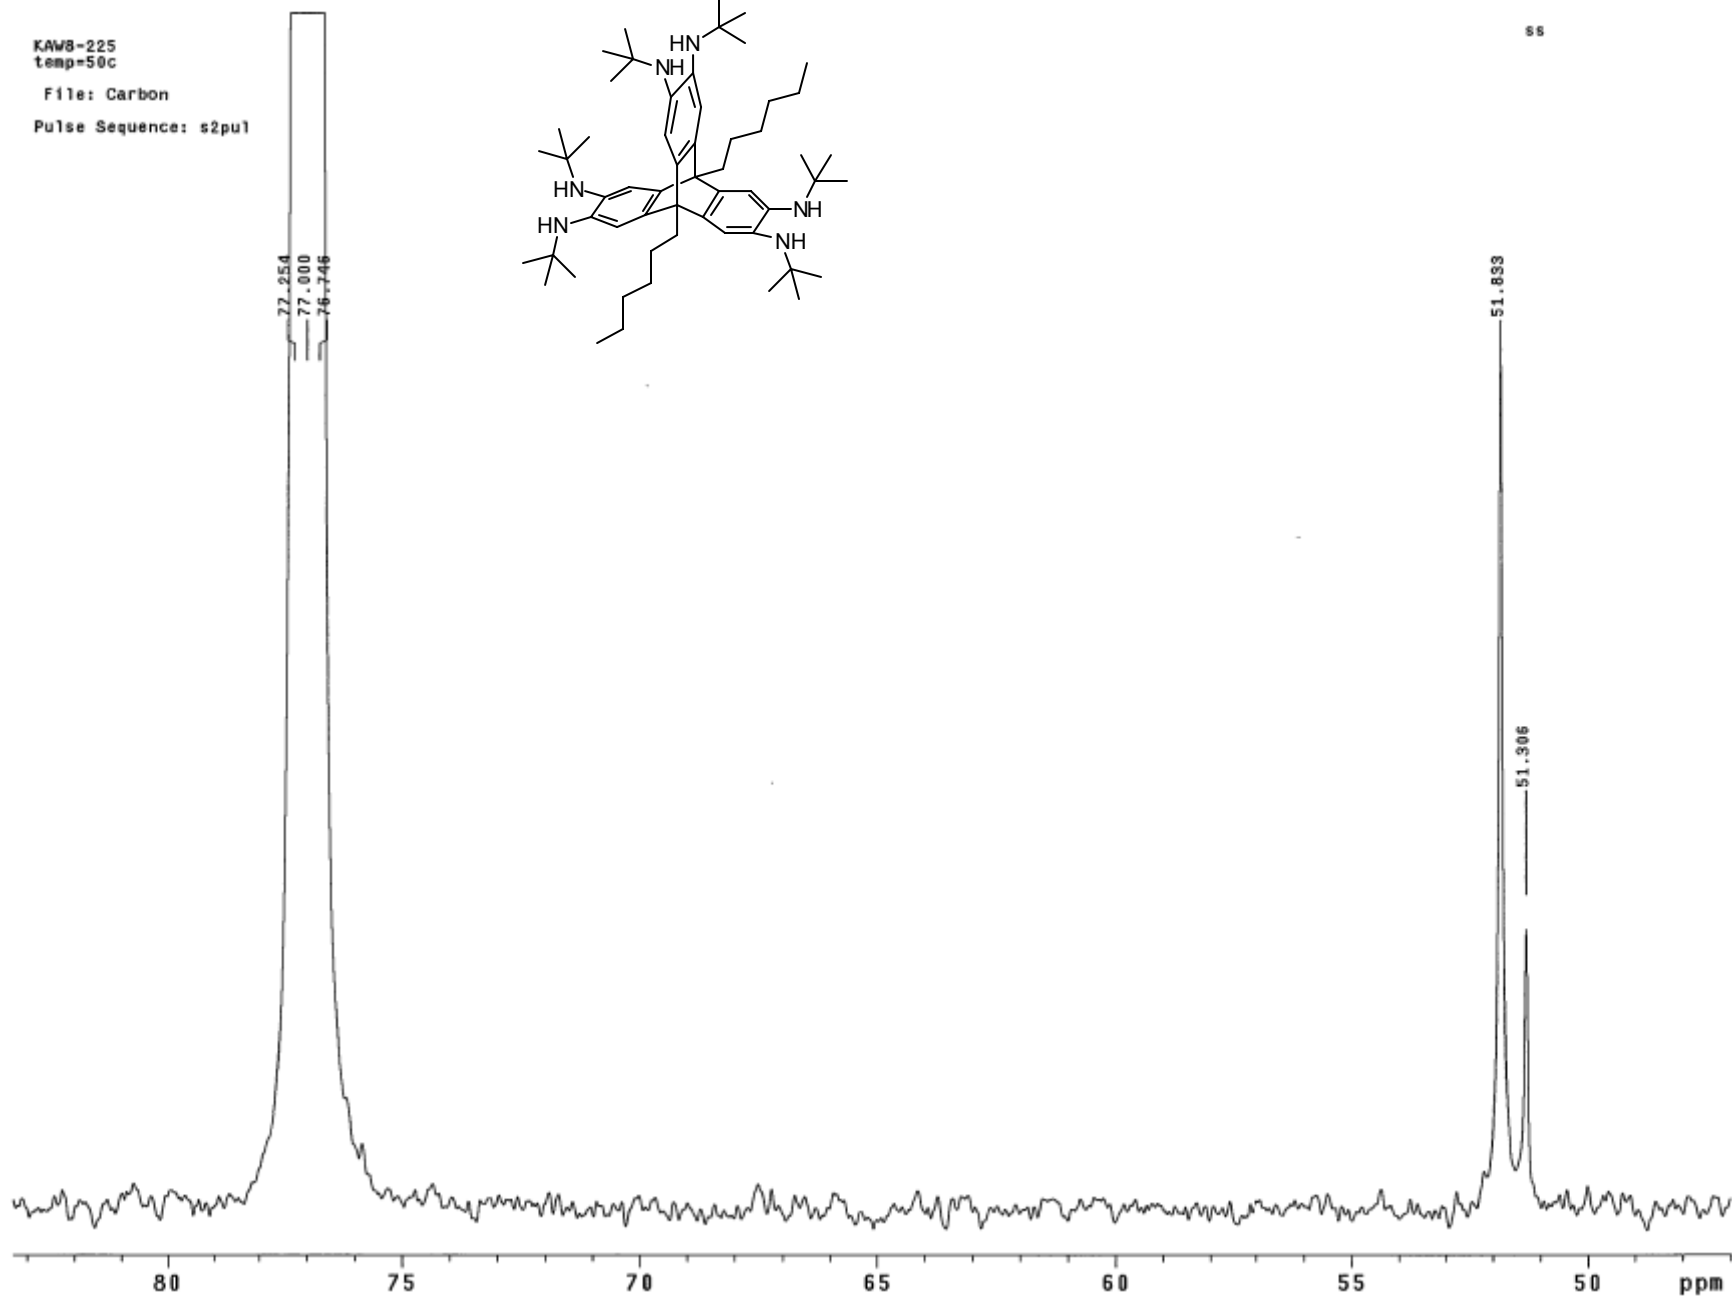

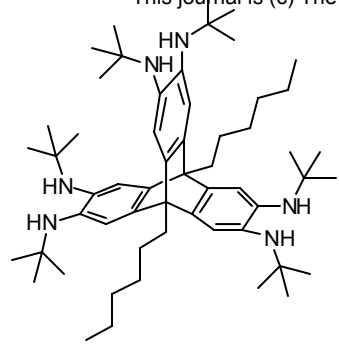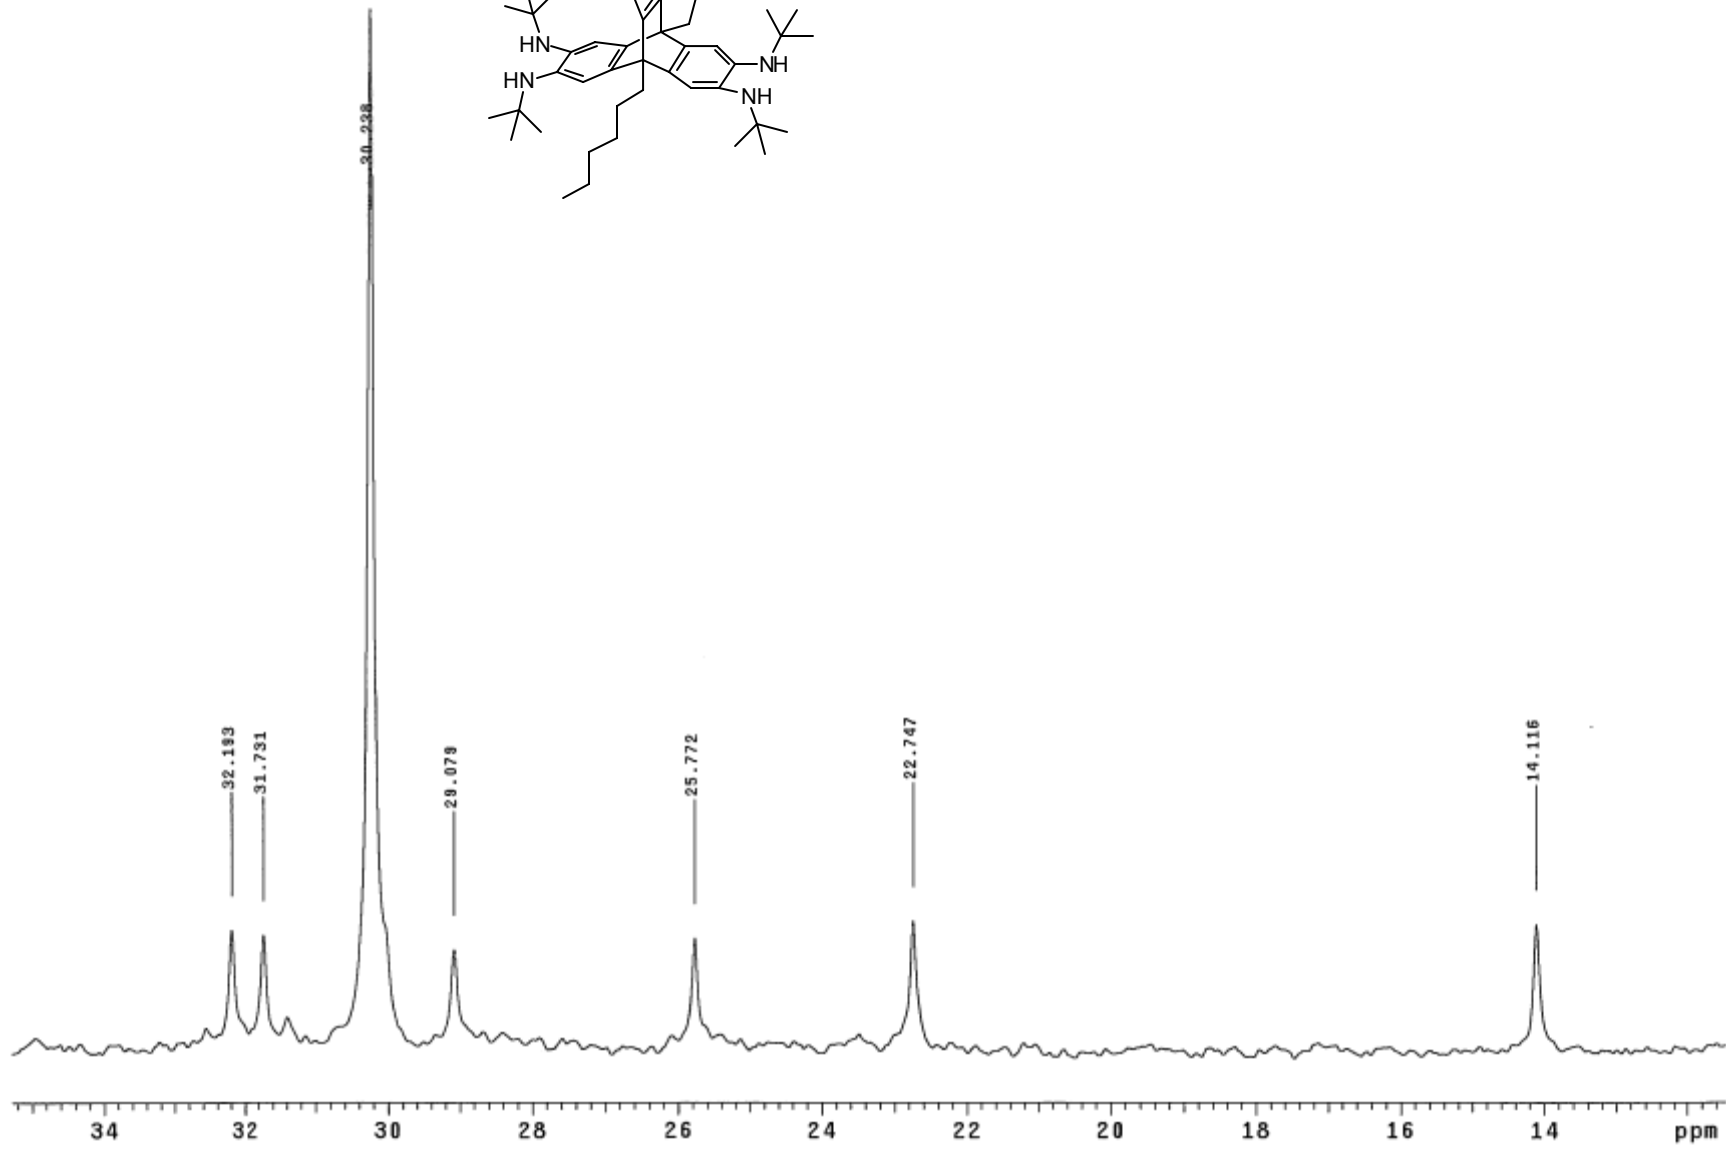

500 MHz nmr0

KAW18-187  
temp=120c

exp2 Proton

| SAMPLE      |             | SPECIAL    |        |
|-------------|-------------|------------|--------|
| date        | Nov 23 2009 | temp       | 120.0  |
| solvent     | dms0        | gain       | 40     |
| file        | exp         | spin       | 20     |
| ACQUISITION |             | SPECIAL    |        |
| sw          | 7997.6      | hst        | 0.008  |
| at          | 4.001       | pw90       | 11.000 |
| np          | 64000       | alfa       | 6.600  |
|             |             | FLAGS      |        |
| fb          | 4000        | i1         | n      |
| bs          | 32          | in         | n      |
| d1          | 2.000       | dp         | y      |
| nt          | 128         | hs         | nn     |
| ct          | 128         | PROCESSING |        |
| TRANSMITTER |             | lb         | 0.10   |
| tn          | H1          | fn         | 262144 |
|             |             | DISPLAY    |        |
| sfrq        | 499.870     | sp         | -249.9 |
| tof         | 499.8       | wp         | 6248.3 |
| tpwr        | 57          | rf1        | 2240.3 |
| pw          | 1.833       | rff        | 1244.7 |
| DECOUPLER   |             | rp         | -67.1  |
| dn          | C13         | lp         | -8.9   |
| dof         | 0           | PLOT       |        |
| dm          | nnn         | wc         | 250    |
| dnn         | c           | sc         | 0      |
| dpwr        | 40          | vs         | 212    |
| dmf         | 14285       | th         | 5      |
|             | ai          | cdc        | ph     |

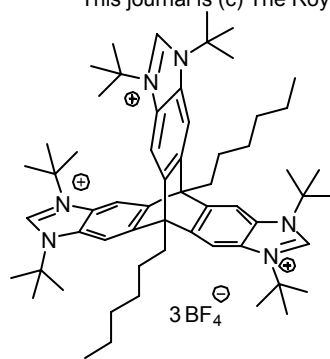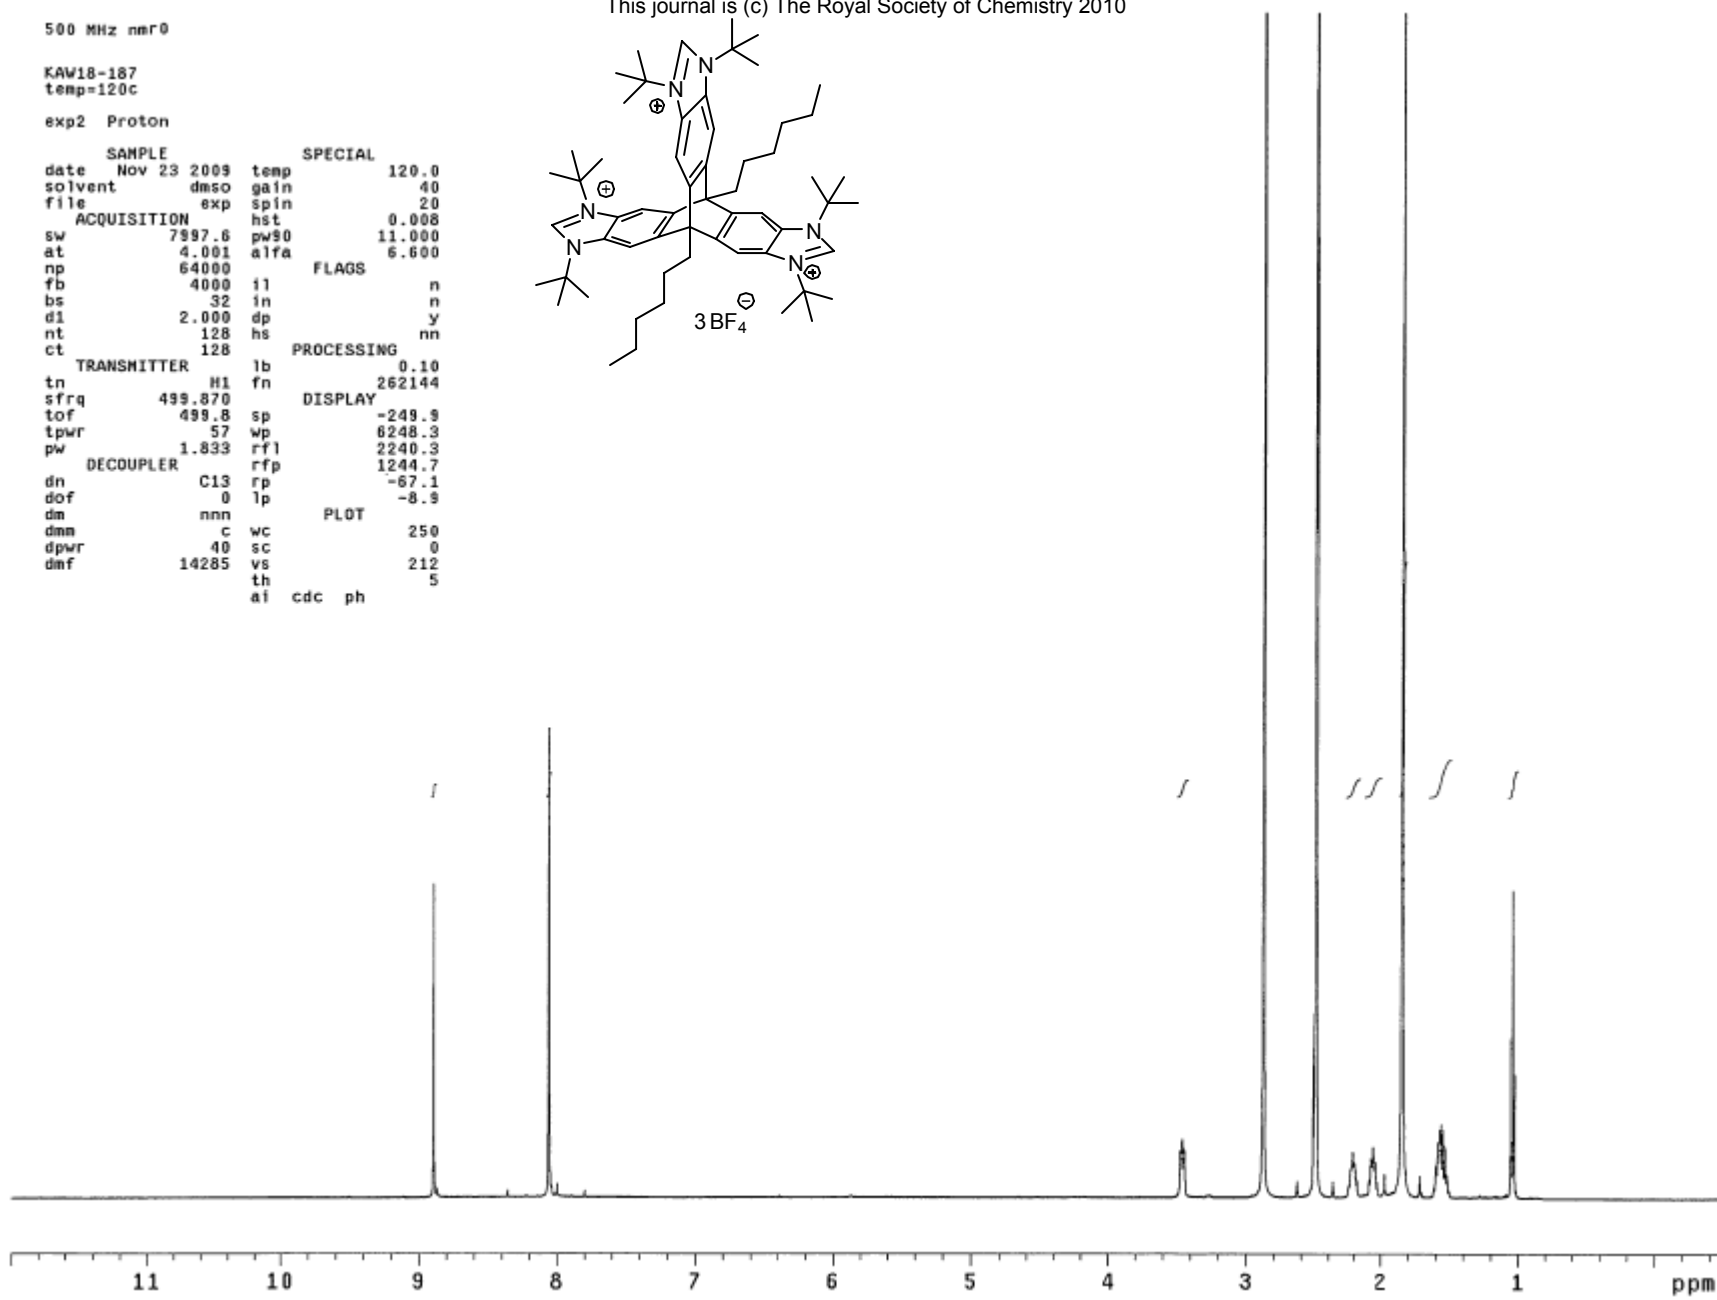

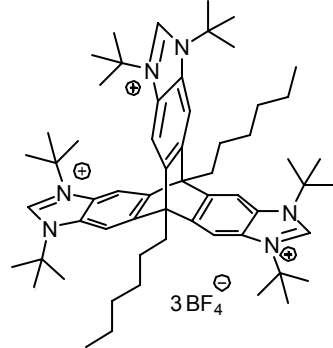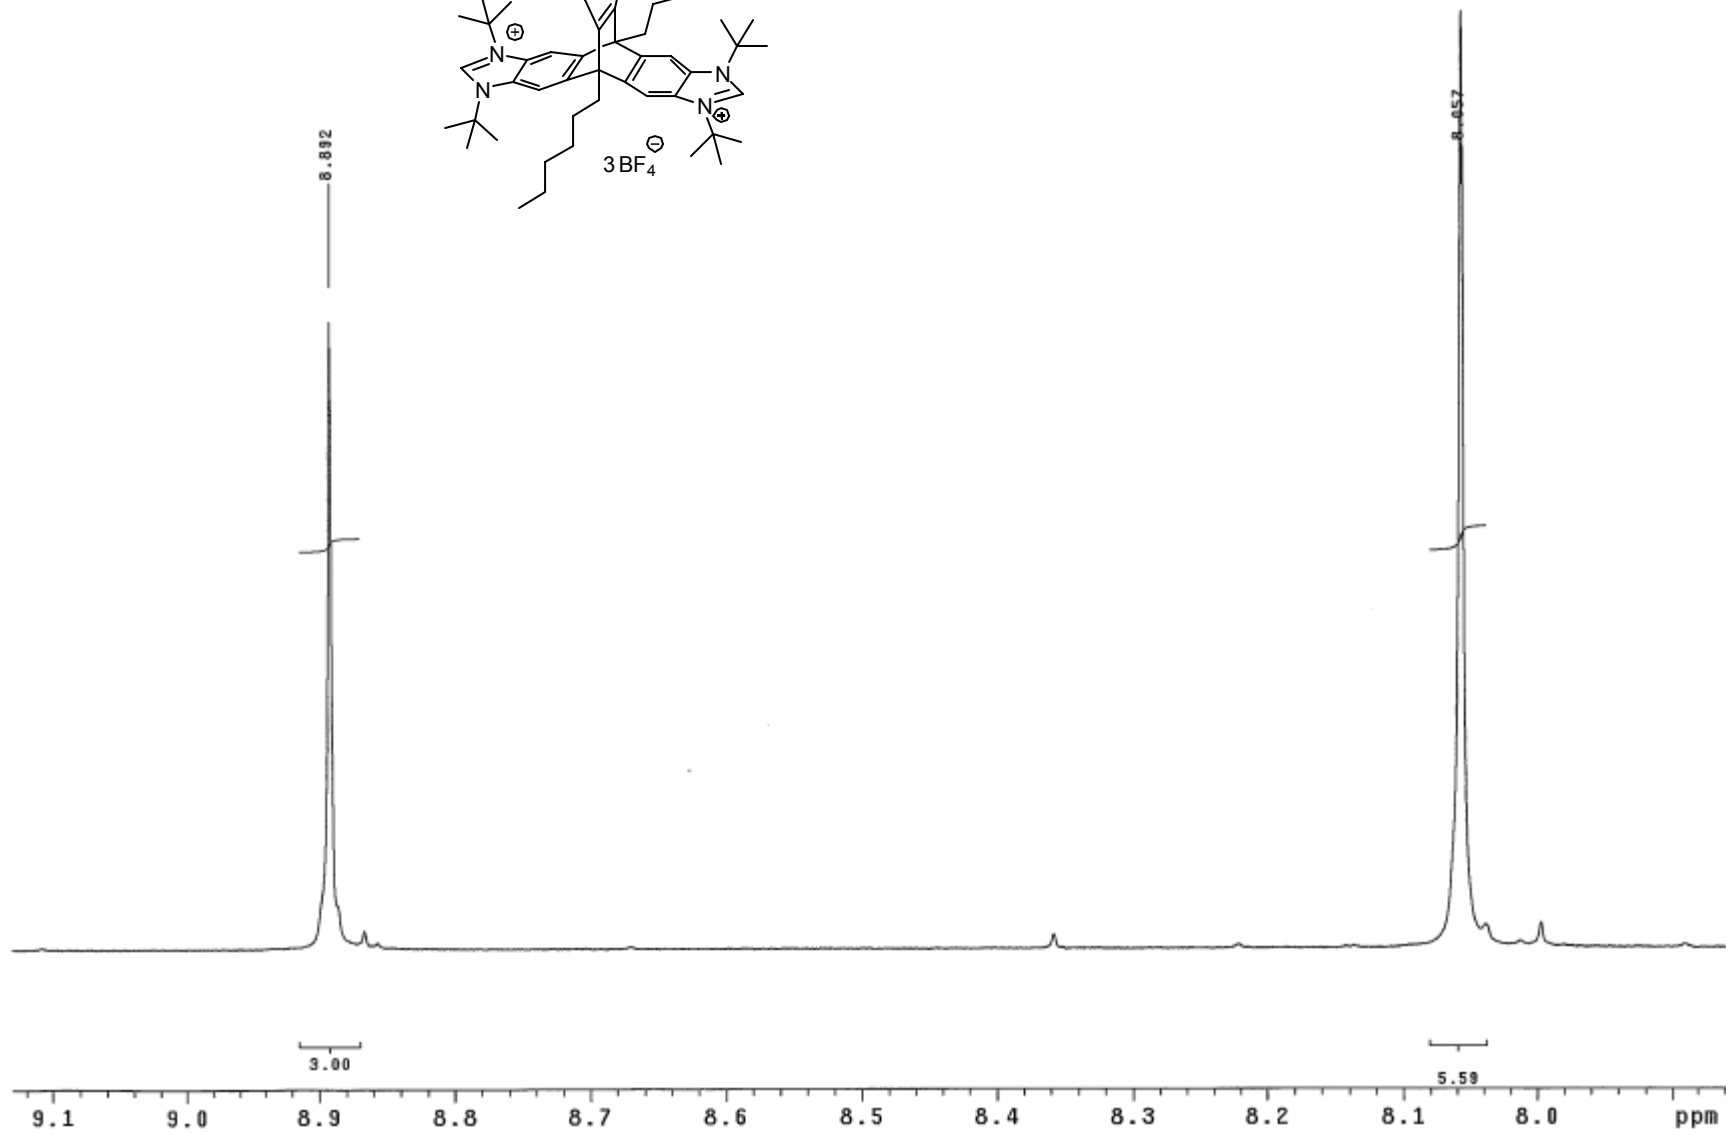

KAW18-187  
temp=120C

File: Proton

Pulse Sequence: s2pu1

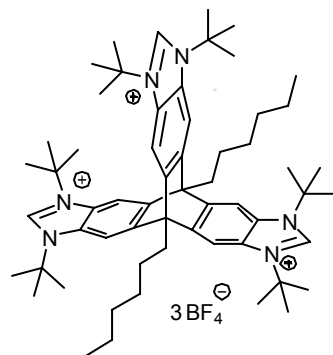

88

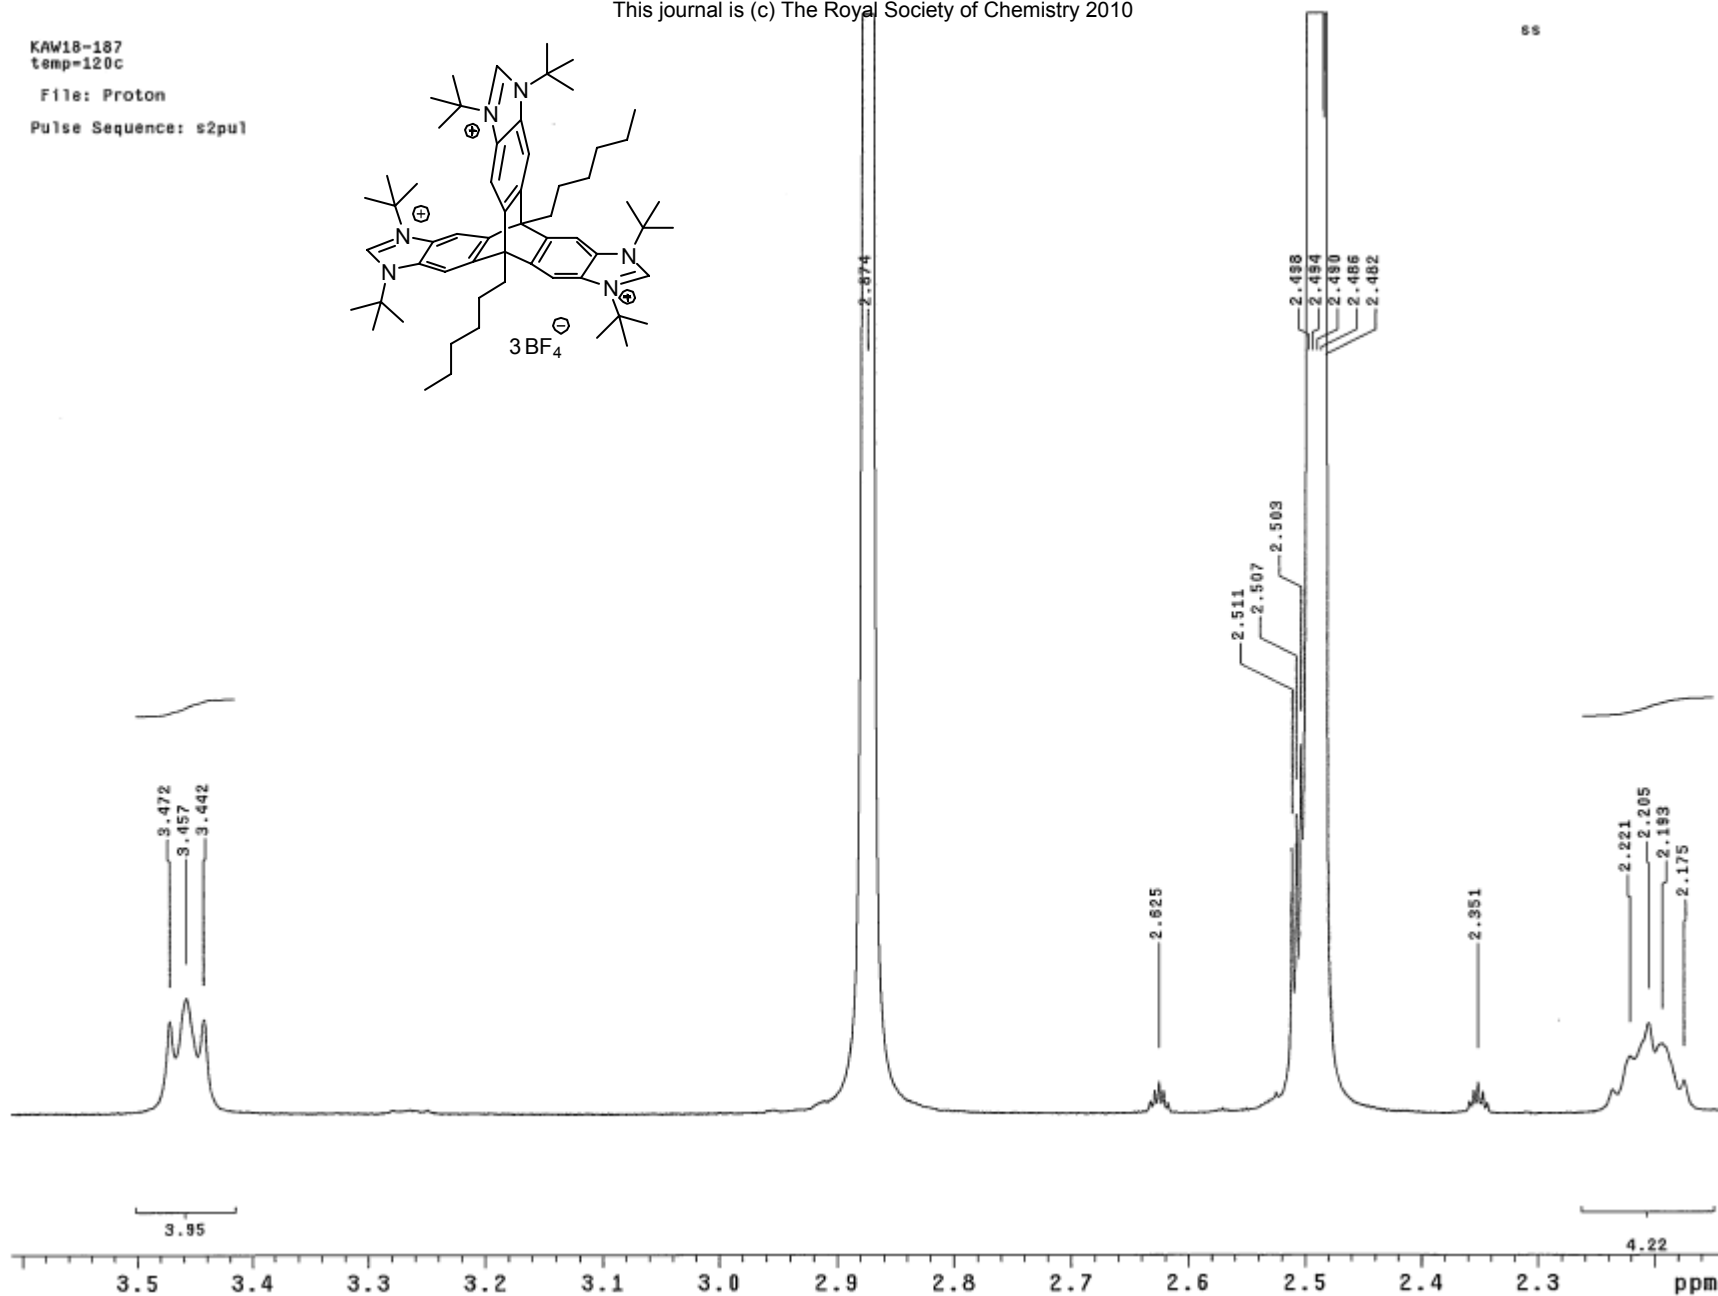



KAW18-187  
temp=120c  
File: Proton  
Pulse Sequence: s2pu1

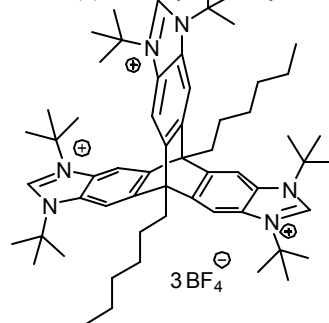

55

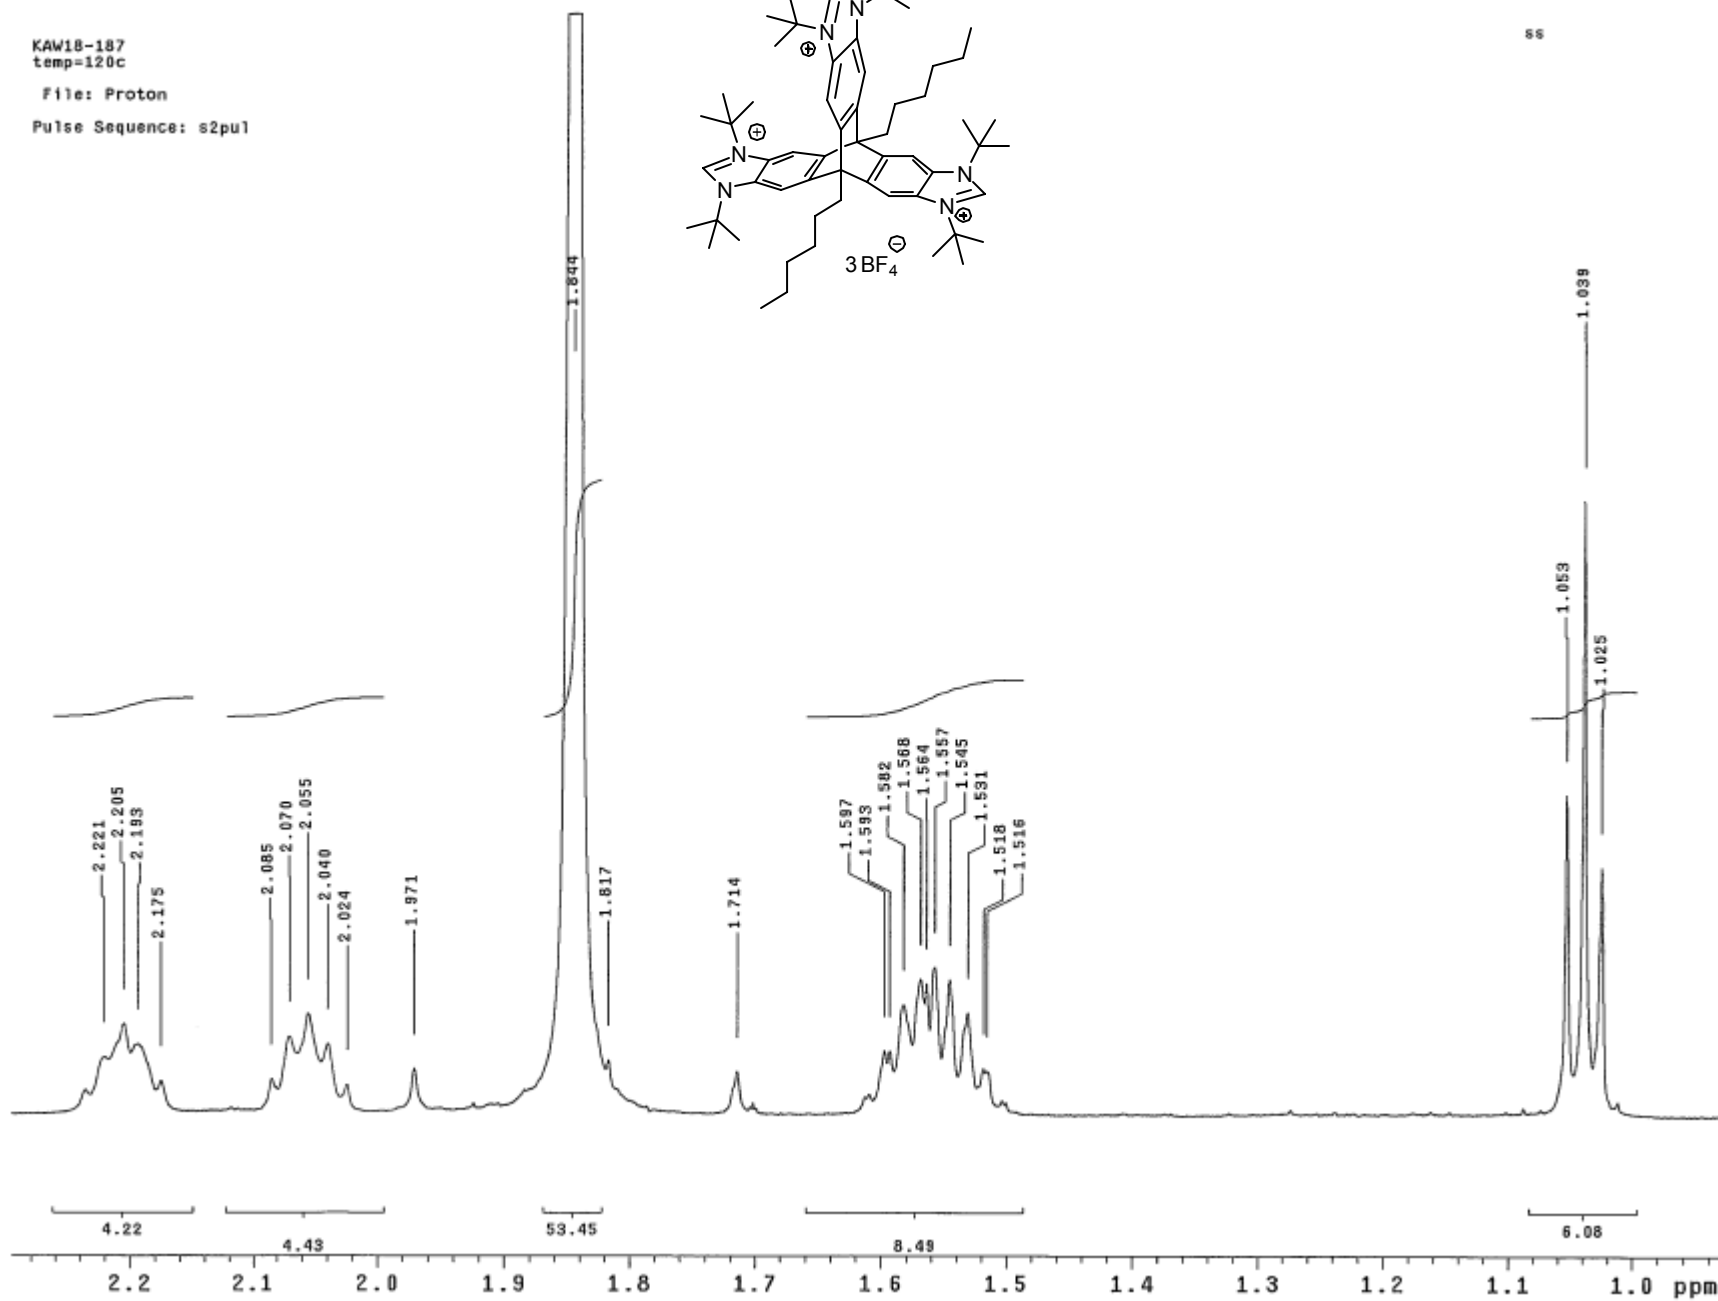

500 MHz nmr0

KAW18-187  
temp=120c

exp4 Carbon

| SAMPLE      |             | SPECIAL    |          |
|-------------|-------------|------------|----------|
| date        | Nov 23 2009 | temp       | 120.0    |
| solvent     | dms0        | gain       | 50       |
| file        | exp         | spin       | 20       |
| ACQUISITION |             |            |          |
| sw          | 32679.7     | hst        | 0.008    |
| at          | 1.958       | pw90       | 9.500    |
| np          | 128000      | alfa       | 10.000   |
| fb          | 18000       | FLAGS      |          |
| bs          | 16          | i1         | n        |
| di          | 2.000       | in         | n        |
| nt          | 15000       | dp         | y        |
| ct          | 15000       | hs         | nn       |
| TRANSMITTER |             | PROCESSING |          |
| tn          | C13         | lb         | 1.00     |
| sfrq        | 125.705     | fn         | not used |
| tof         | 1883.9      | DISPLAY    |          |
| tpwr        | 53          | sp         | -628.6   |
| pw          | 3.163       | wp         | 28280.6  |
| DECOUPLER   |             | rf1        | 7646.8   |
| dn          | H1          | rfp        | 4964.8   |
| dof         | 0           | rp         | -14.1    |
| dm          | yyy         | lp         | -198.8   |
|             |             | PLOT       |          |
| dmm         | w           | wc         | 250      |
| dpwr        | 37          | sc         | 0        |
| dmf         | 10582       | vs         | 8706     |
|             |             | th         | 5        |
|             |             | ai         | cdc ph   |

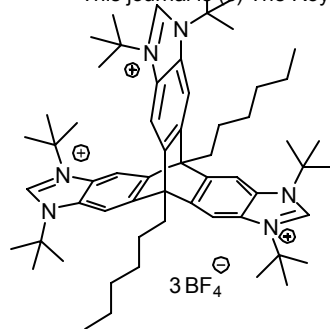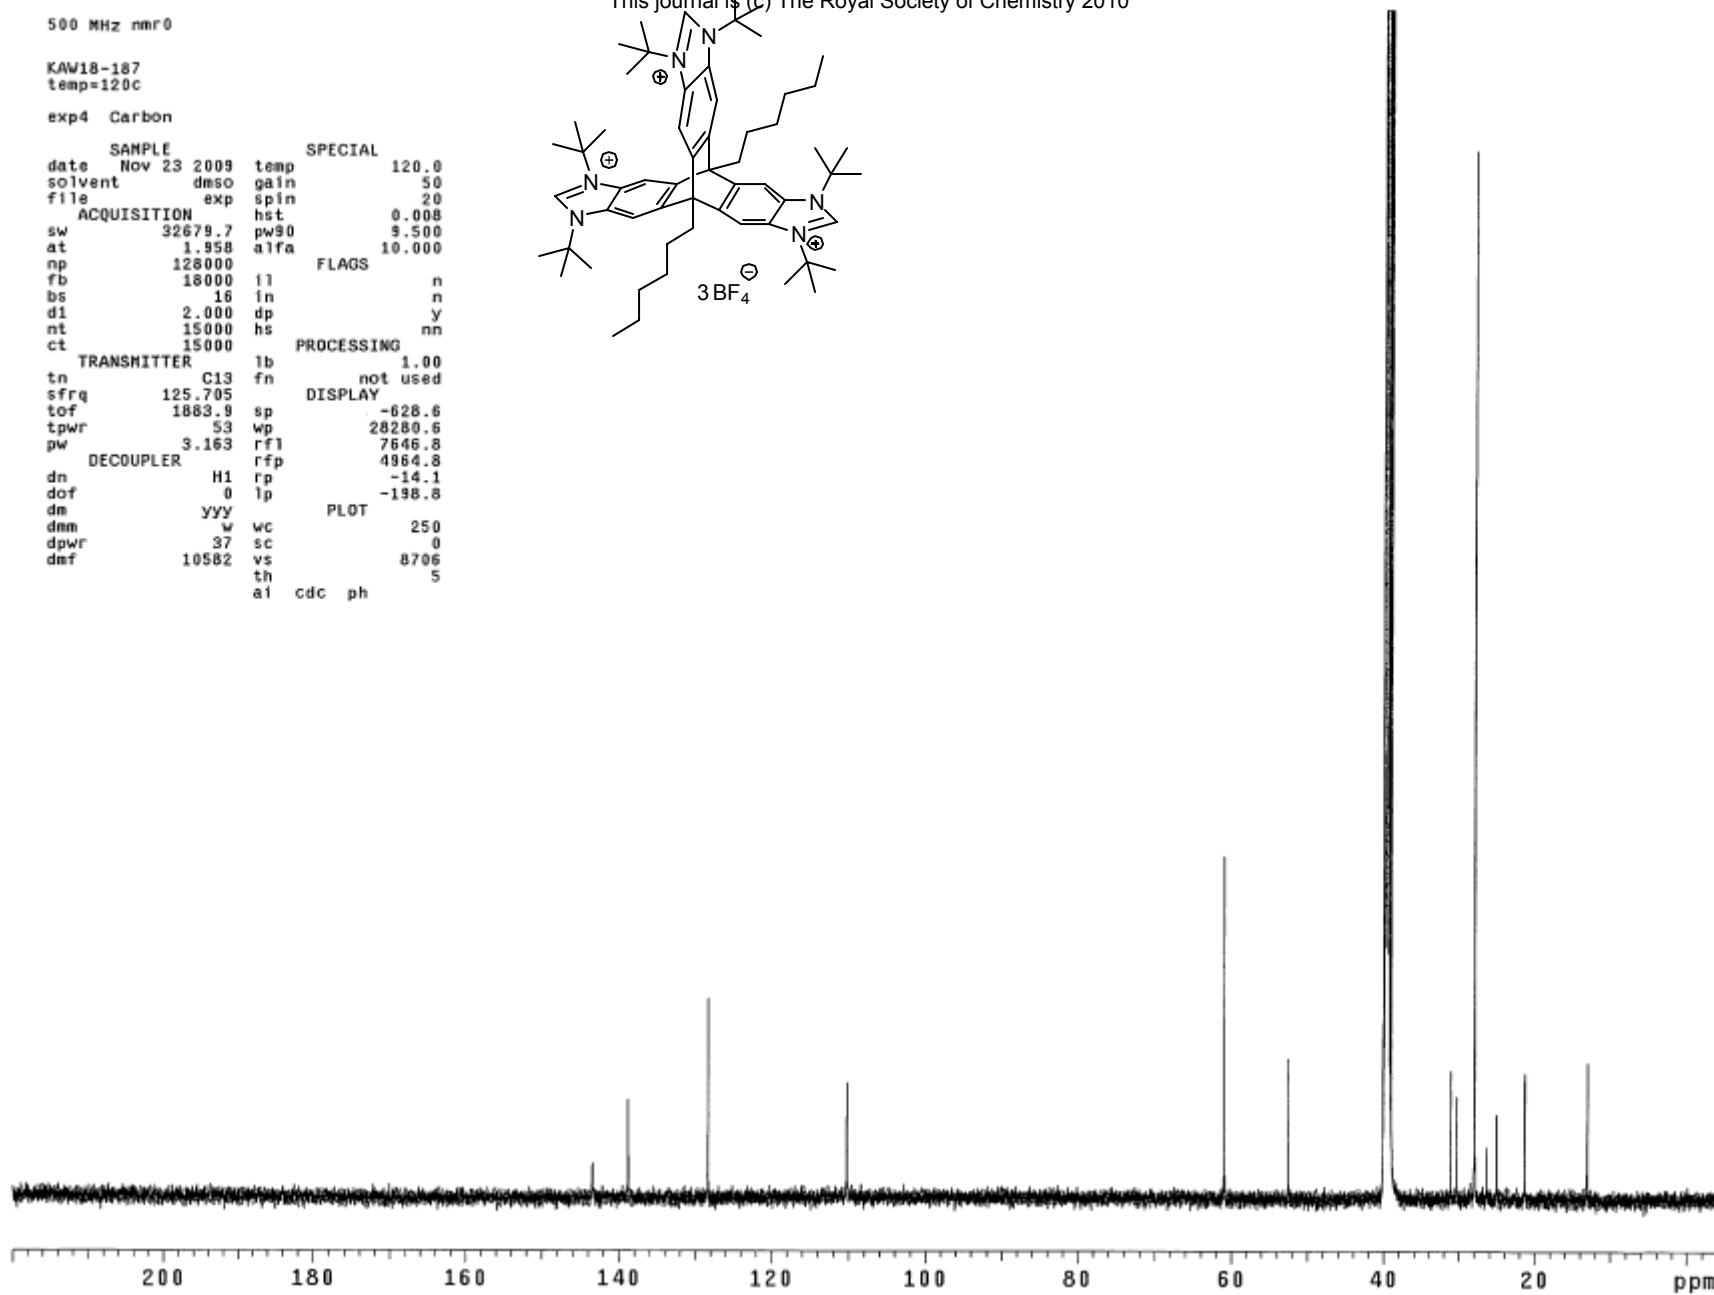

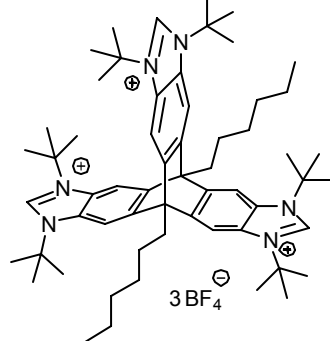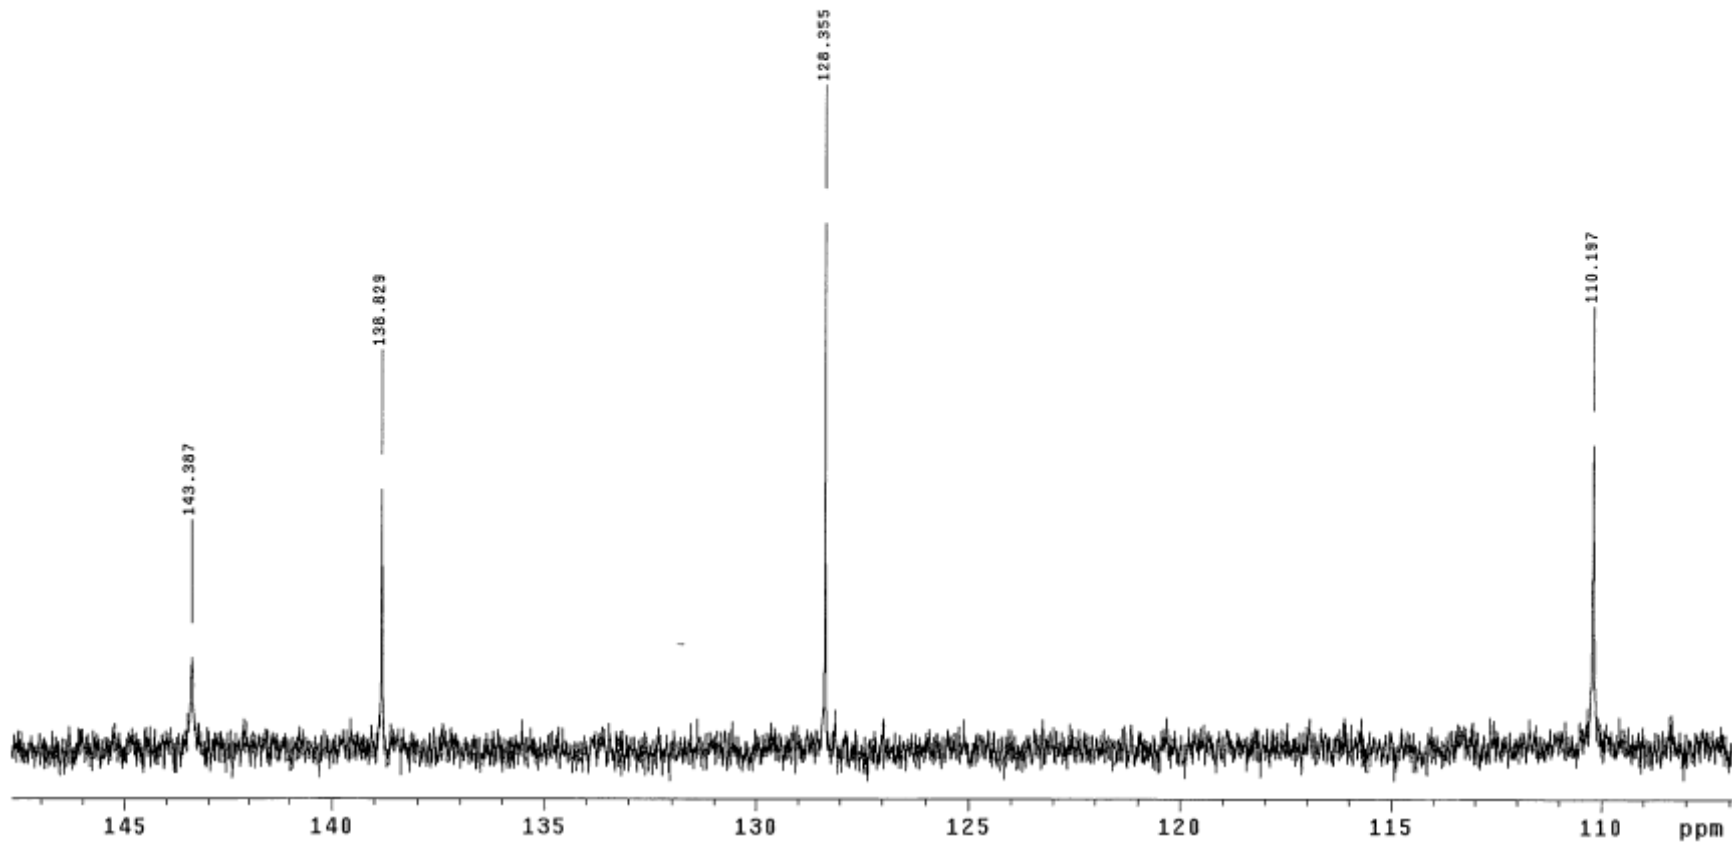

KAW18-187  
temp=120c  
File: Carbon  
Pulse Sequence: s2pu1

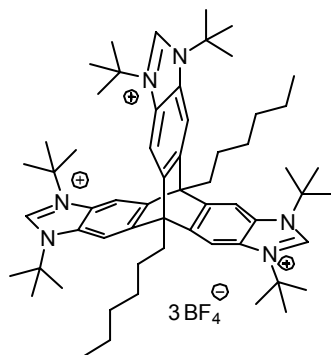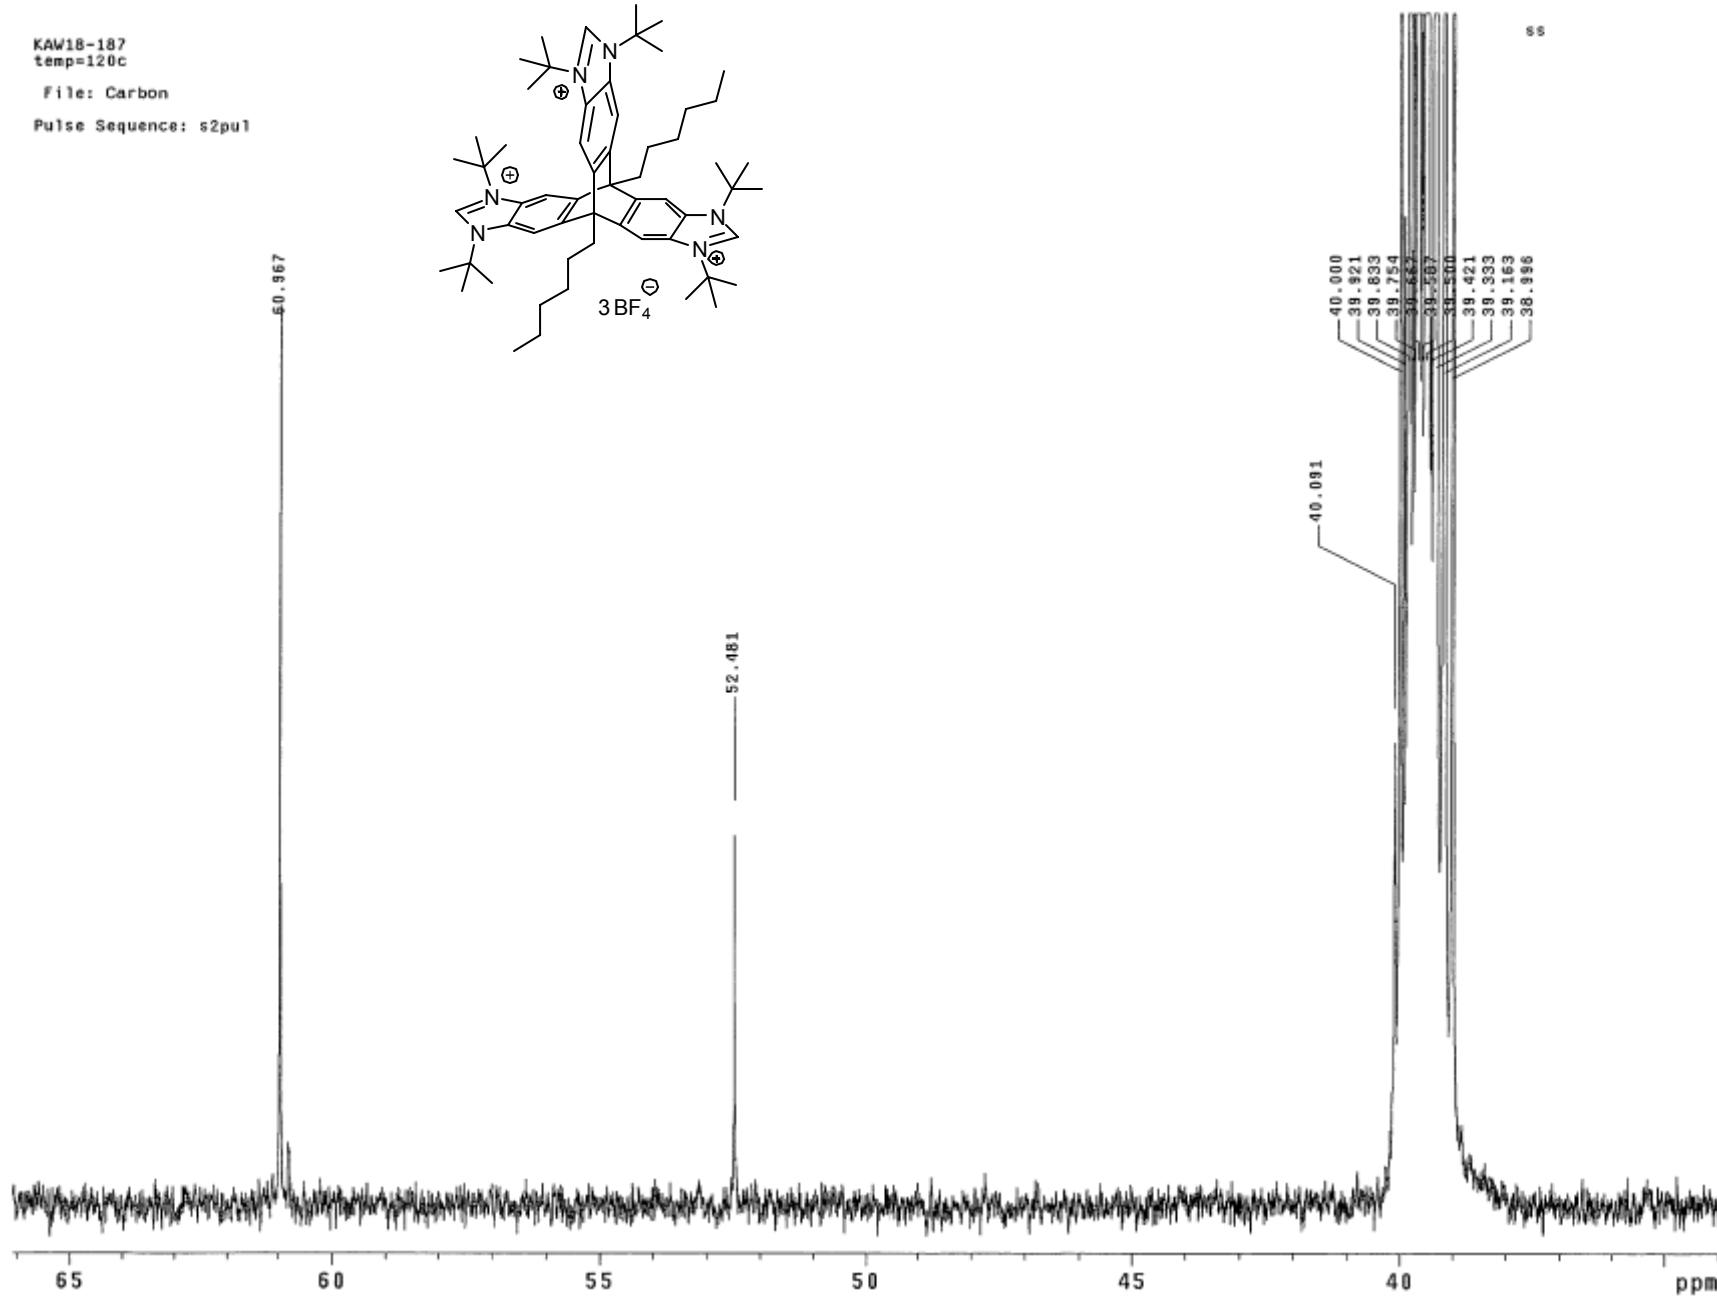

KAW18-187  
temp=120c  
File: Carbon  
Pulse Sequence: s2pu1

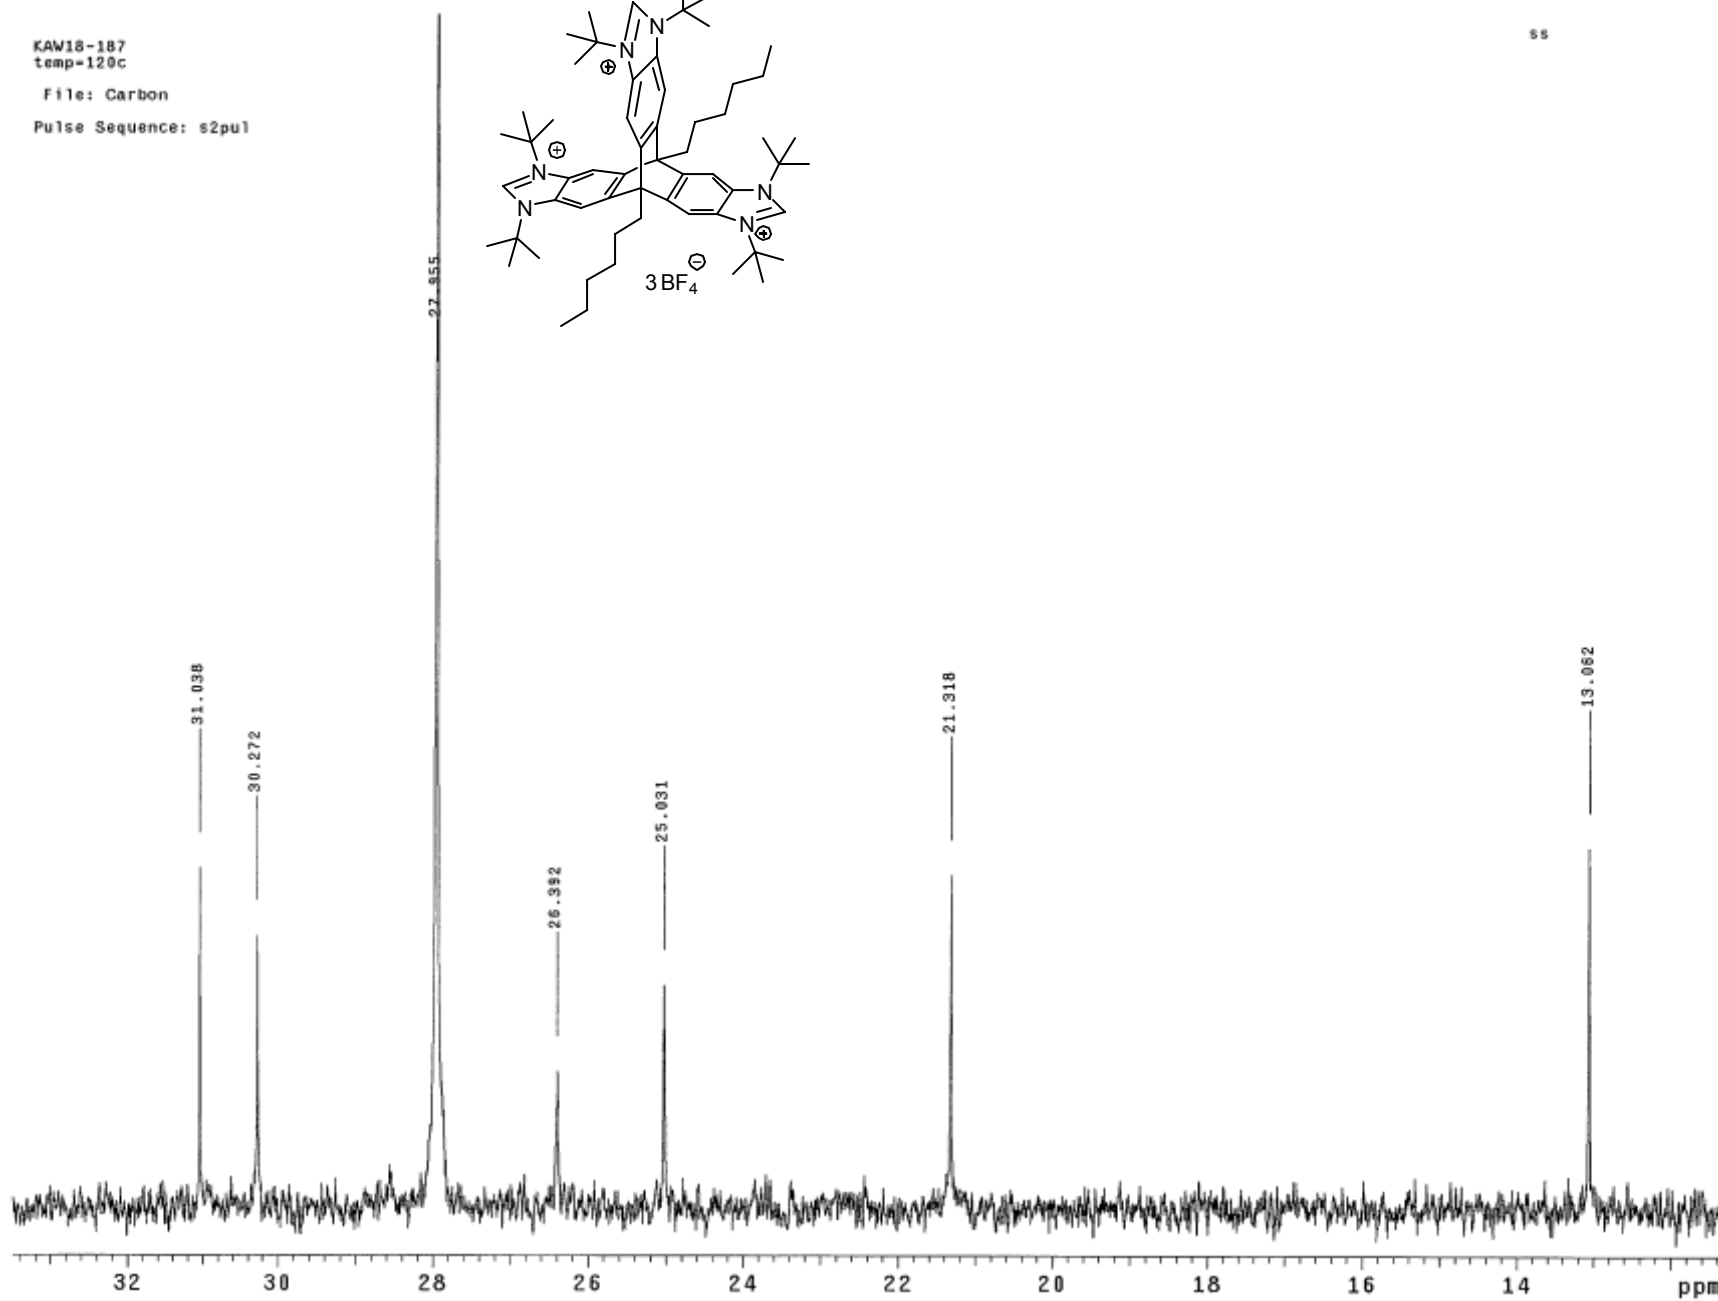

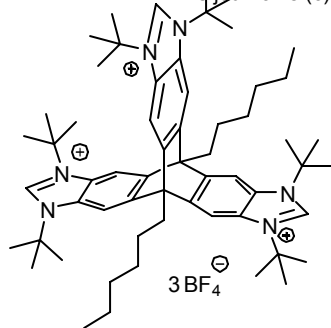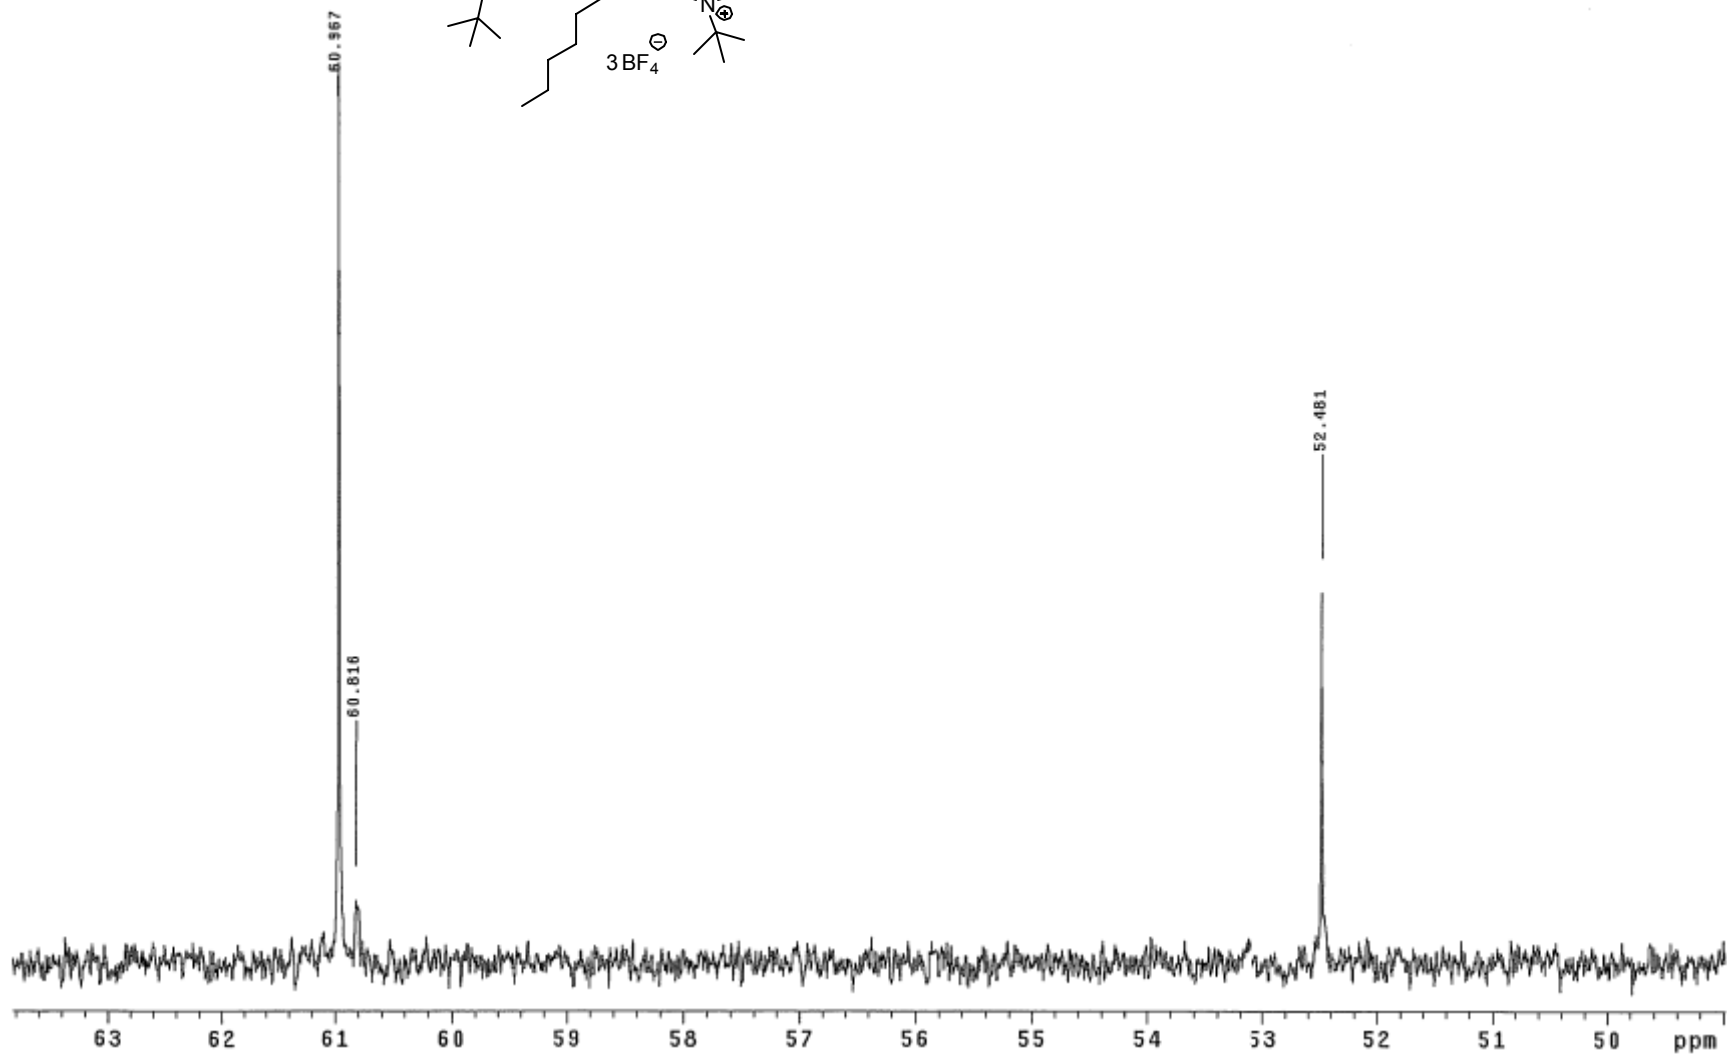



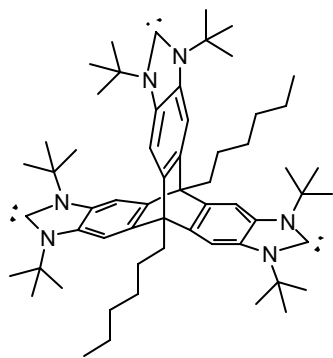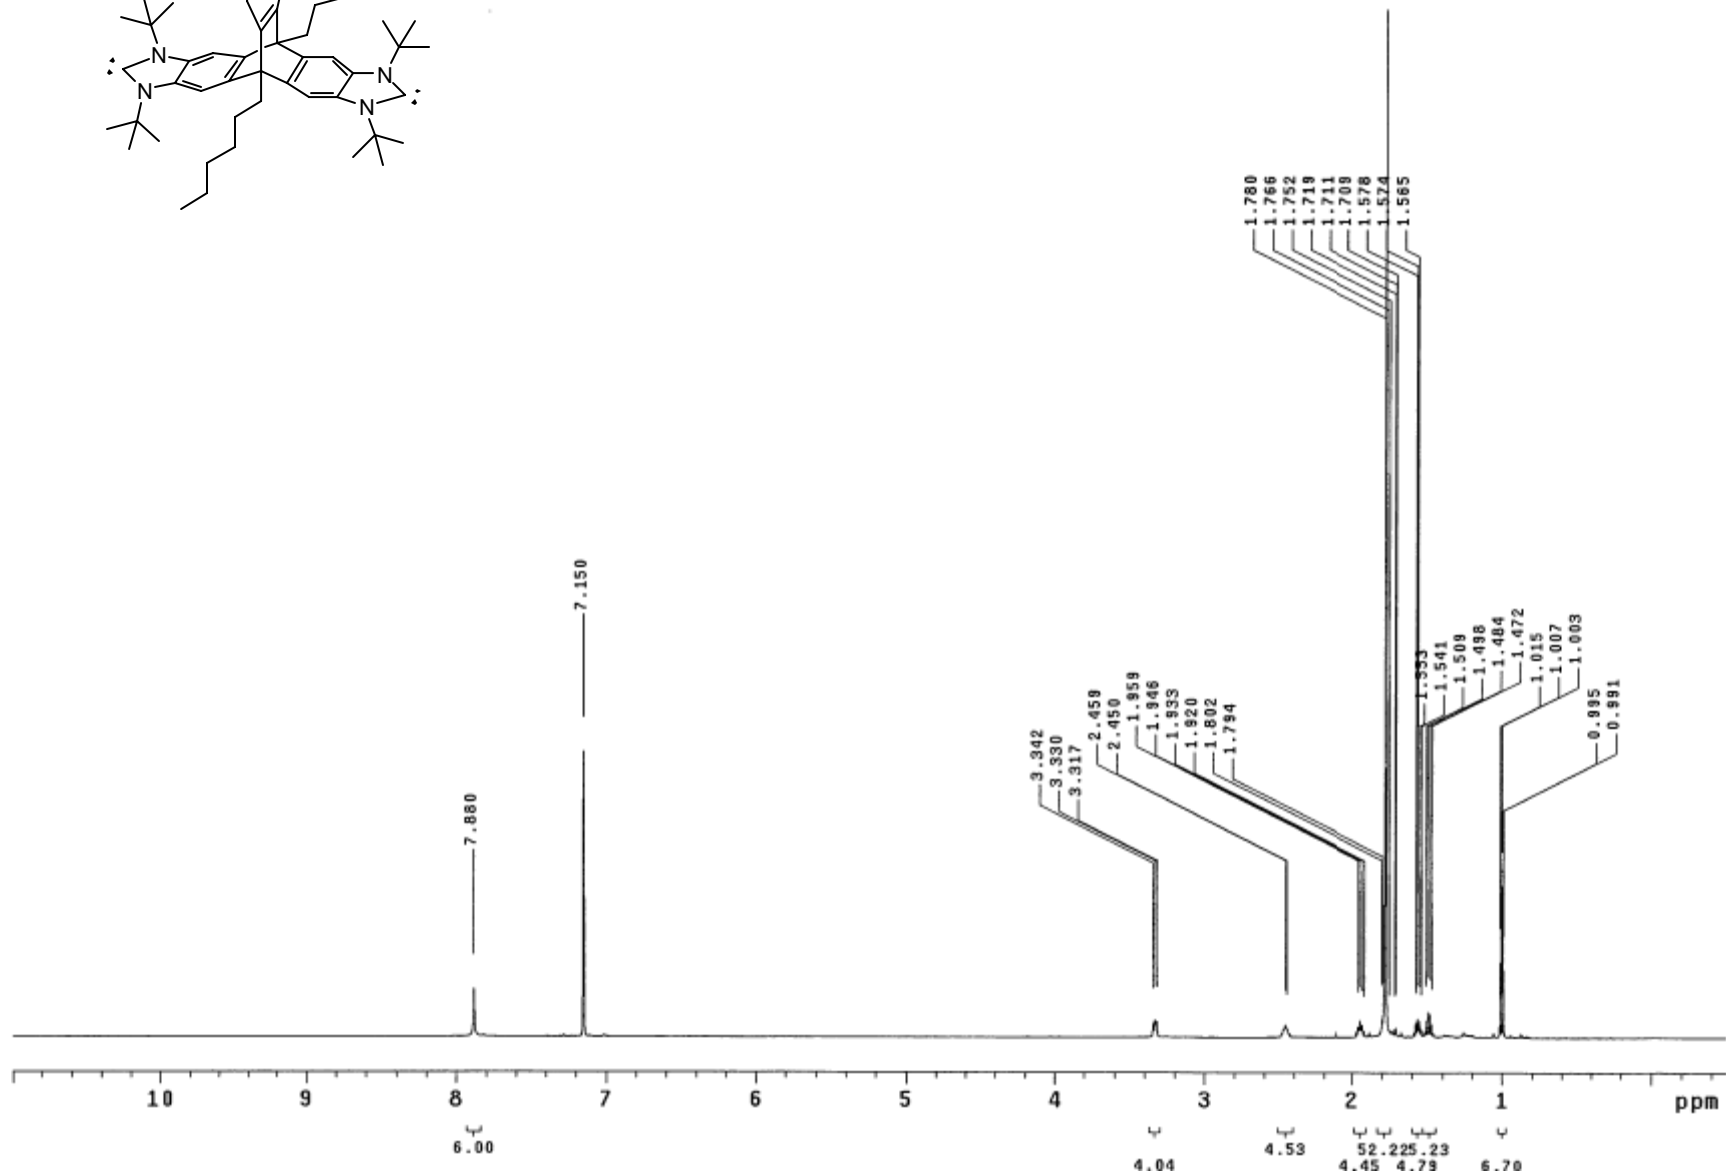



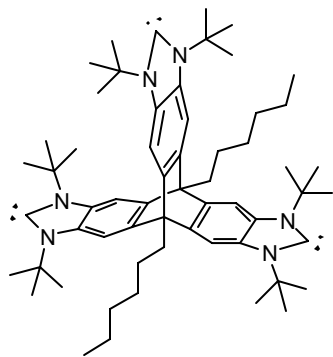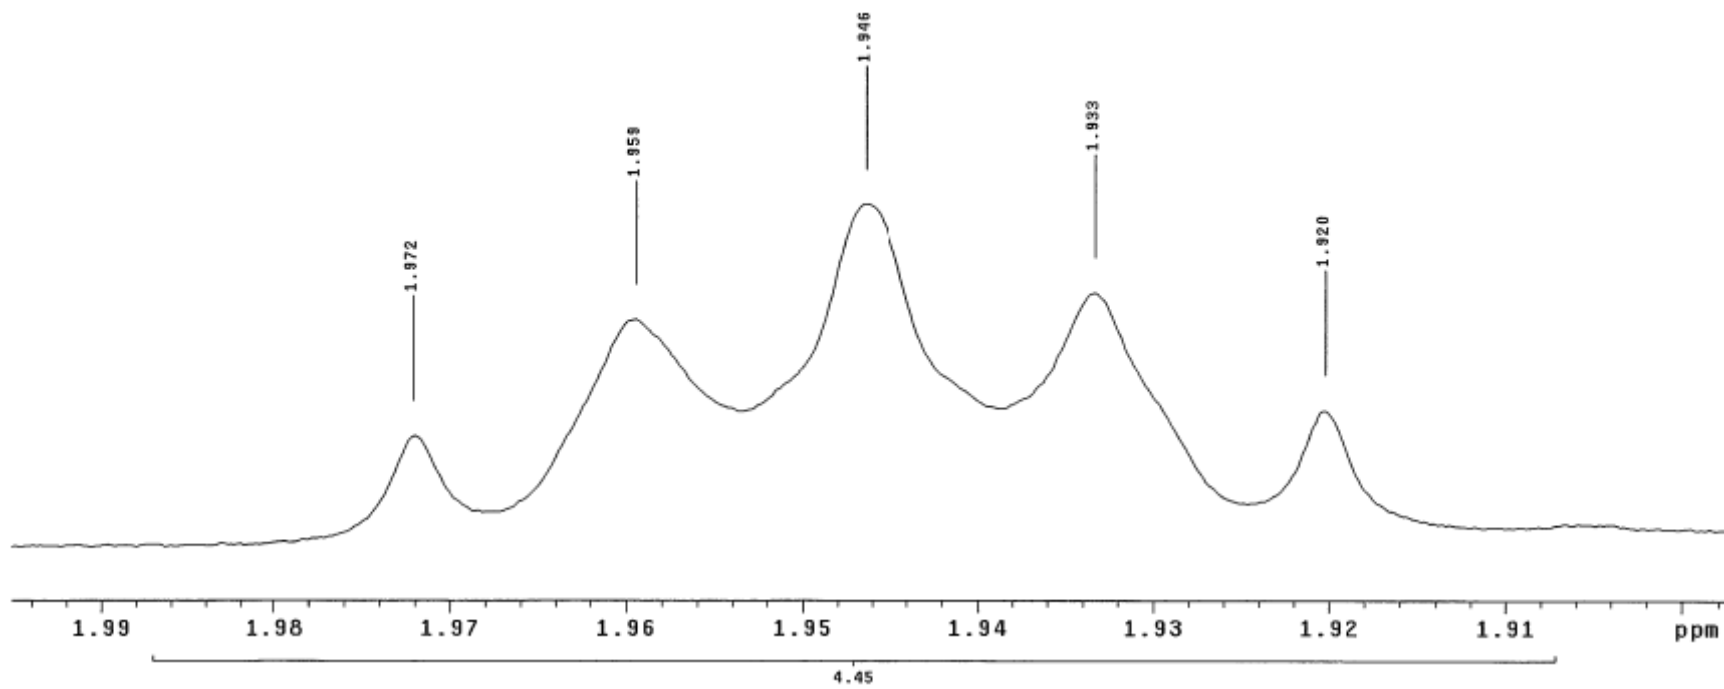

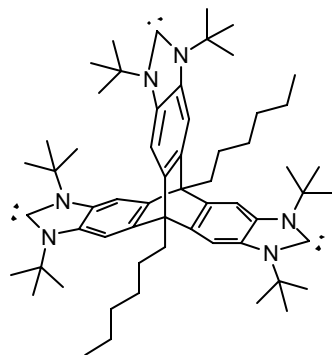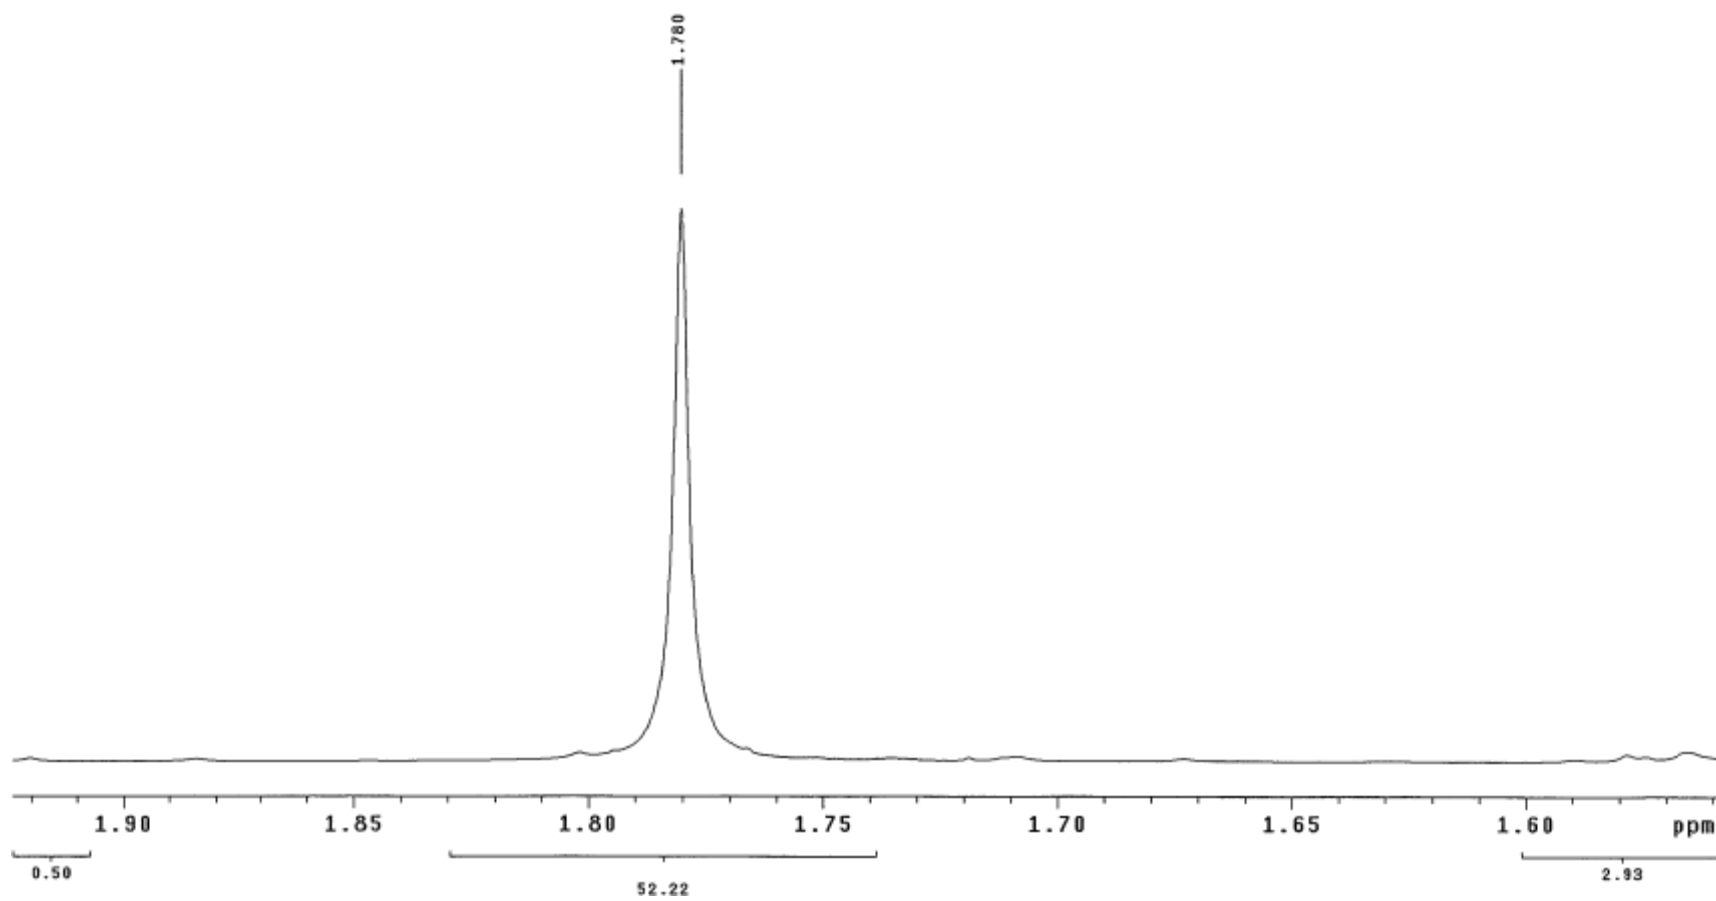

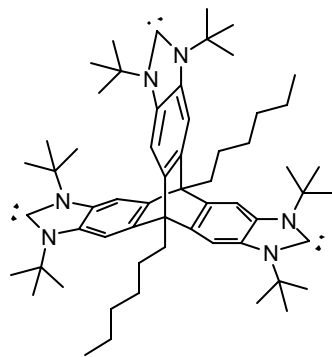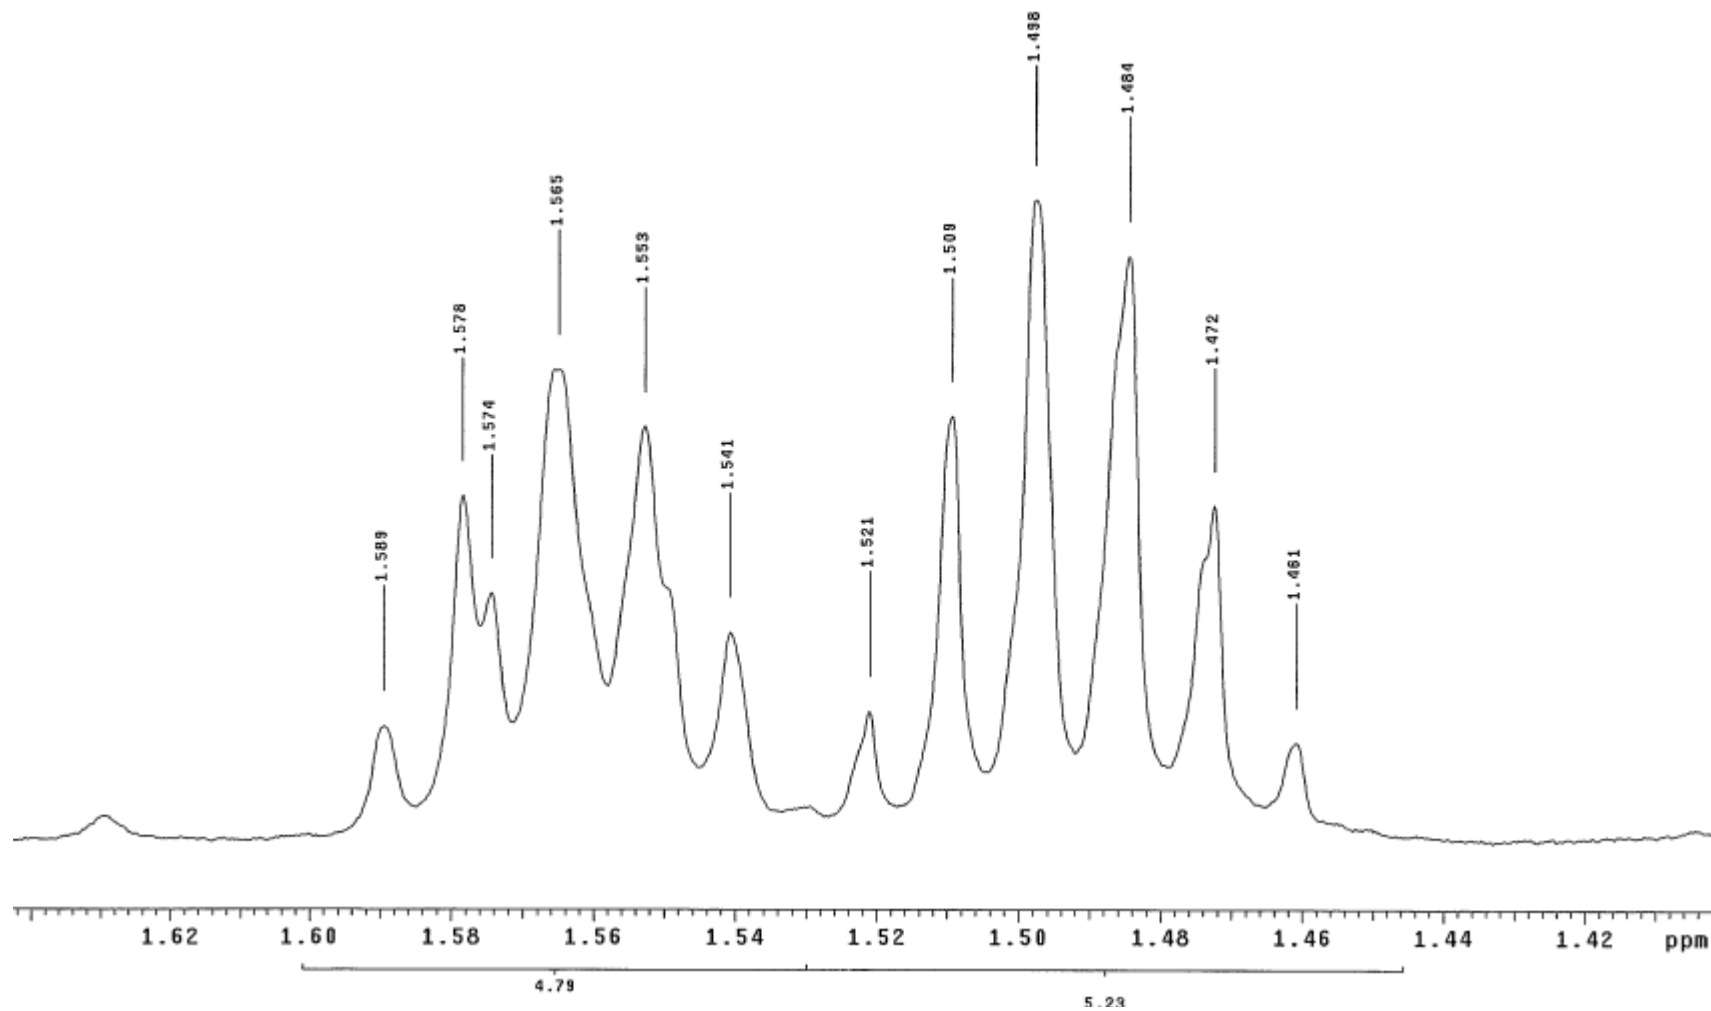

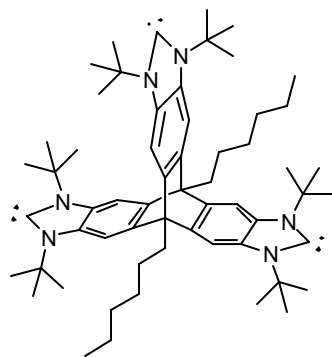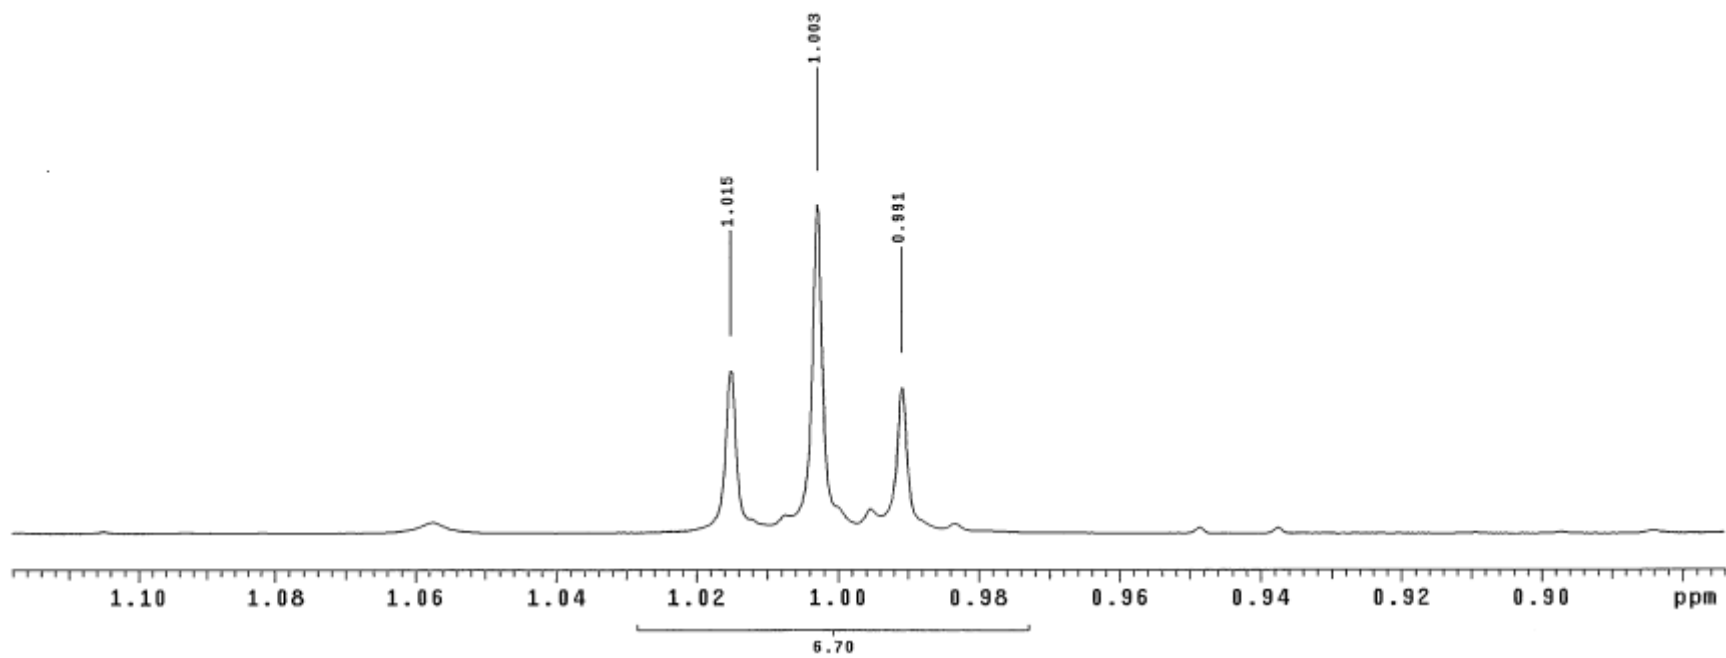

500 MHz nmr0

KAN8-272  
temp = 50c

exp4 Carbon

|             |             |            |          |
|-------------|-------------|------------|----------|
| SAMPLE      |             | SPECIAL    |          |
| date        | Feb 24 2010 | temp       | 60.0     |
| solvent     | c6d6        | gain       | 50       |
| file        | exp         | spin       | 20       |
| ACQUISITION |             | hst        | 0.008    |
| sw          | 40221.2     | pw90       | 9.500    |
| at          | 1.958       | alfa       | 10.000   |
| np          | 157538      | FLAGS      |          |
| fb          | 22000       | il         | n        |
| bs          | 16          | in         | n        |
| d1          | 2.000       | dp         | y        |
| nt          | 10000       | hs         | nn       |
| ct          | 10000       | PROCESSING |          |
| TRANSMITTER |             | lb         | 1.00     |
| tn          | C13         | fn         | not used |
| sfrq        | 125.709     | DISPLAY    |          |
| tof         | 5654.6      | sp         | -1257.0  |
| tpwr        | 53          | wp         | 38964.0  |
| pw          | 3.163       | rfl        | 18577.2  |
| DECOUPLER   |             | rfp        | 16088.4  |
| dn          | H1          | rp         | 12.6     |
| dof         | 0           | lp         | -272.2   |
| dm          | yyy         | PLOT       |          |
| dnm         | w           | wc         | 250      |
| dpwr        | 37          | sc         | 0        |
| dmf         | 10582       | vs         | 1292     |
|             |             | th         | 5        |
|             |             | ai         | cdc ph   |

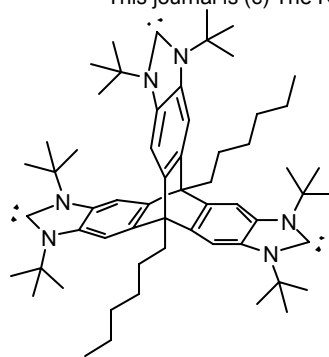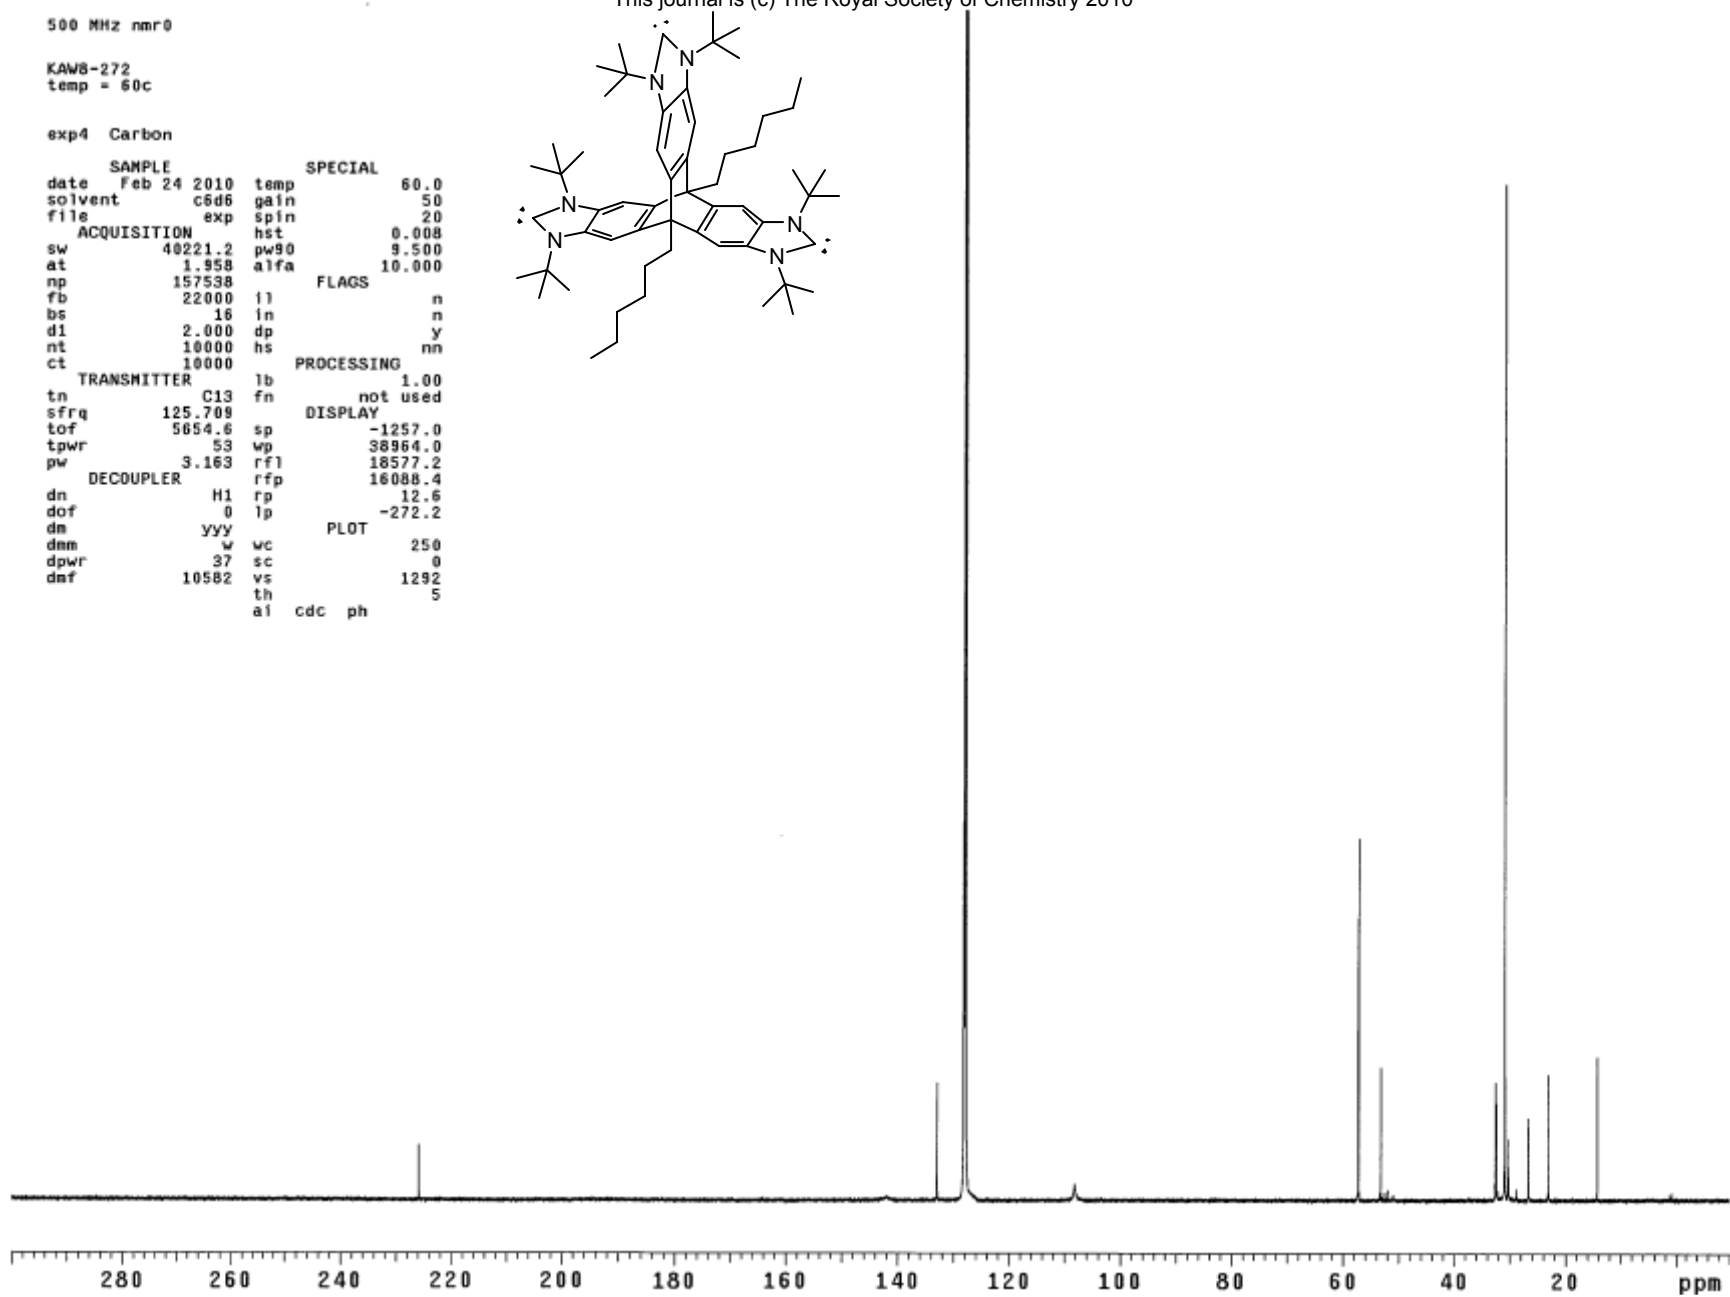

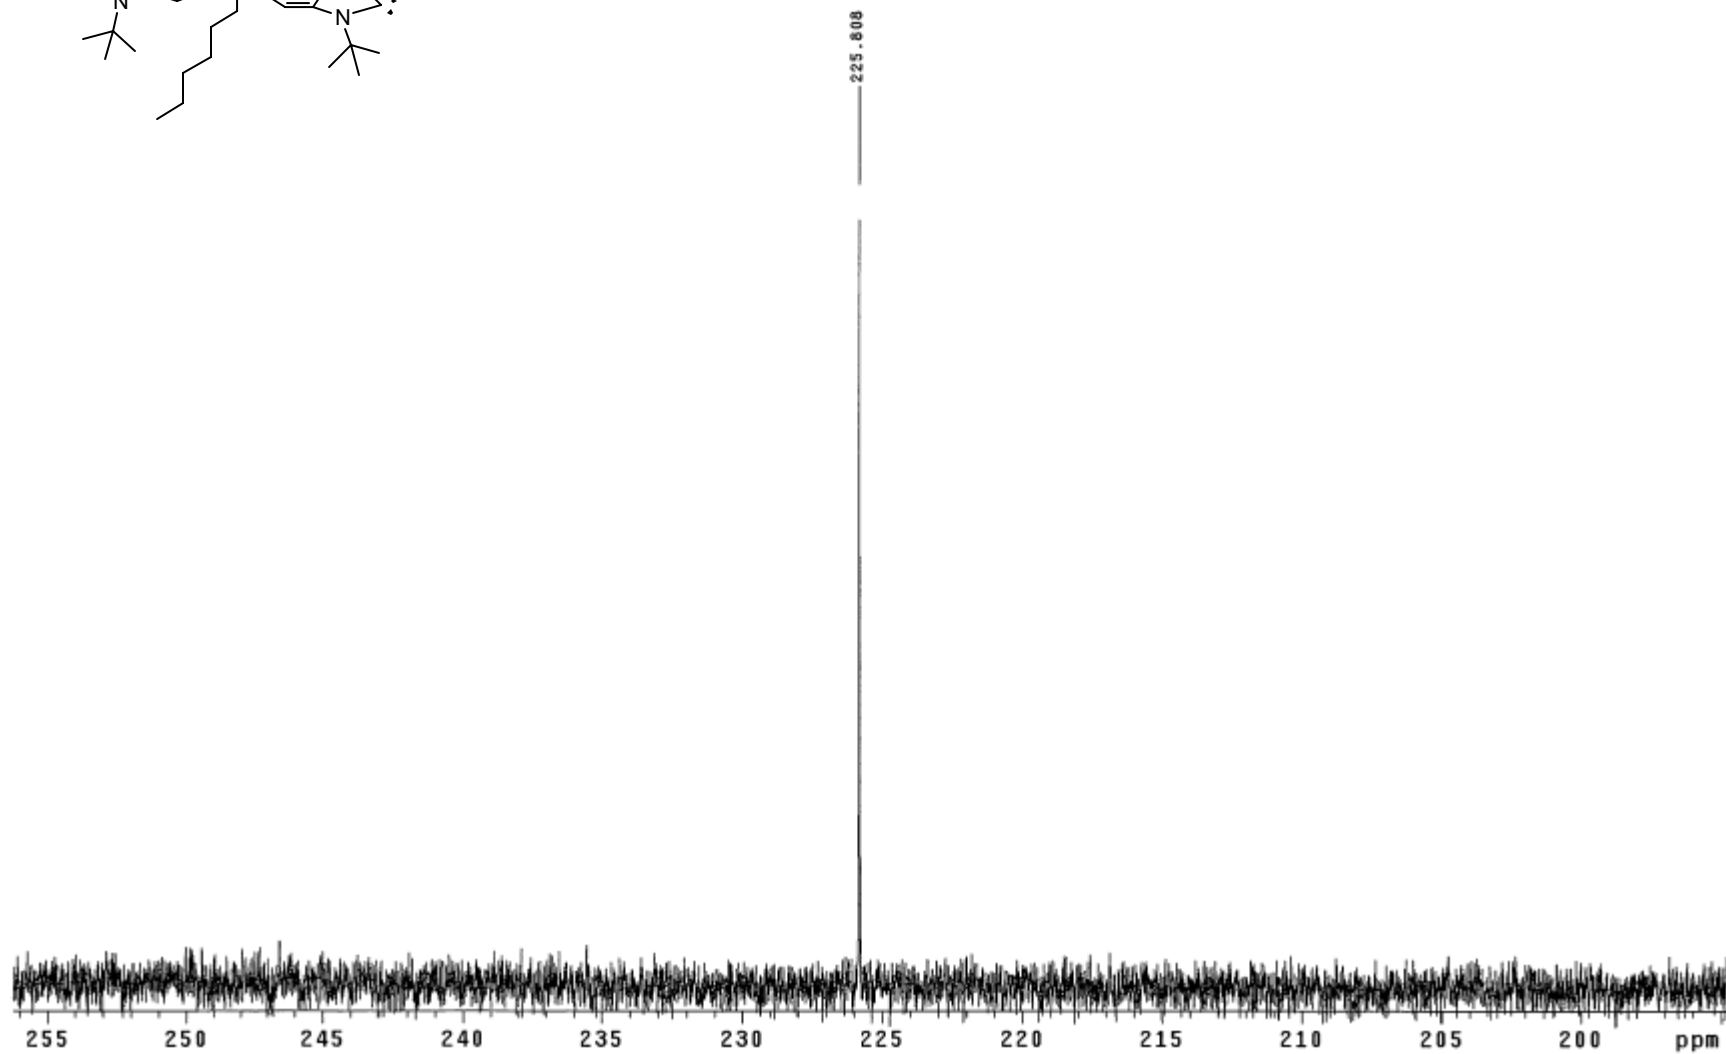

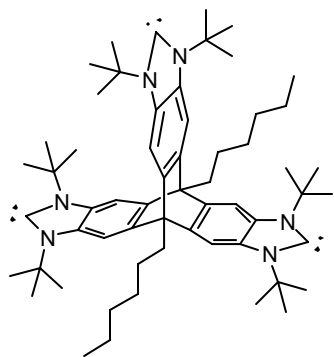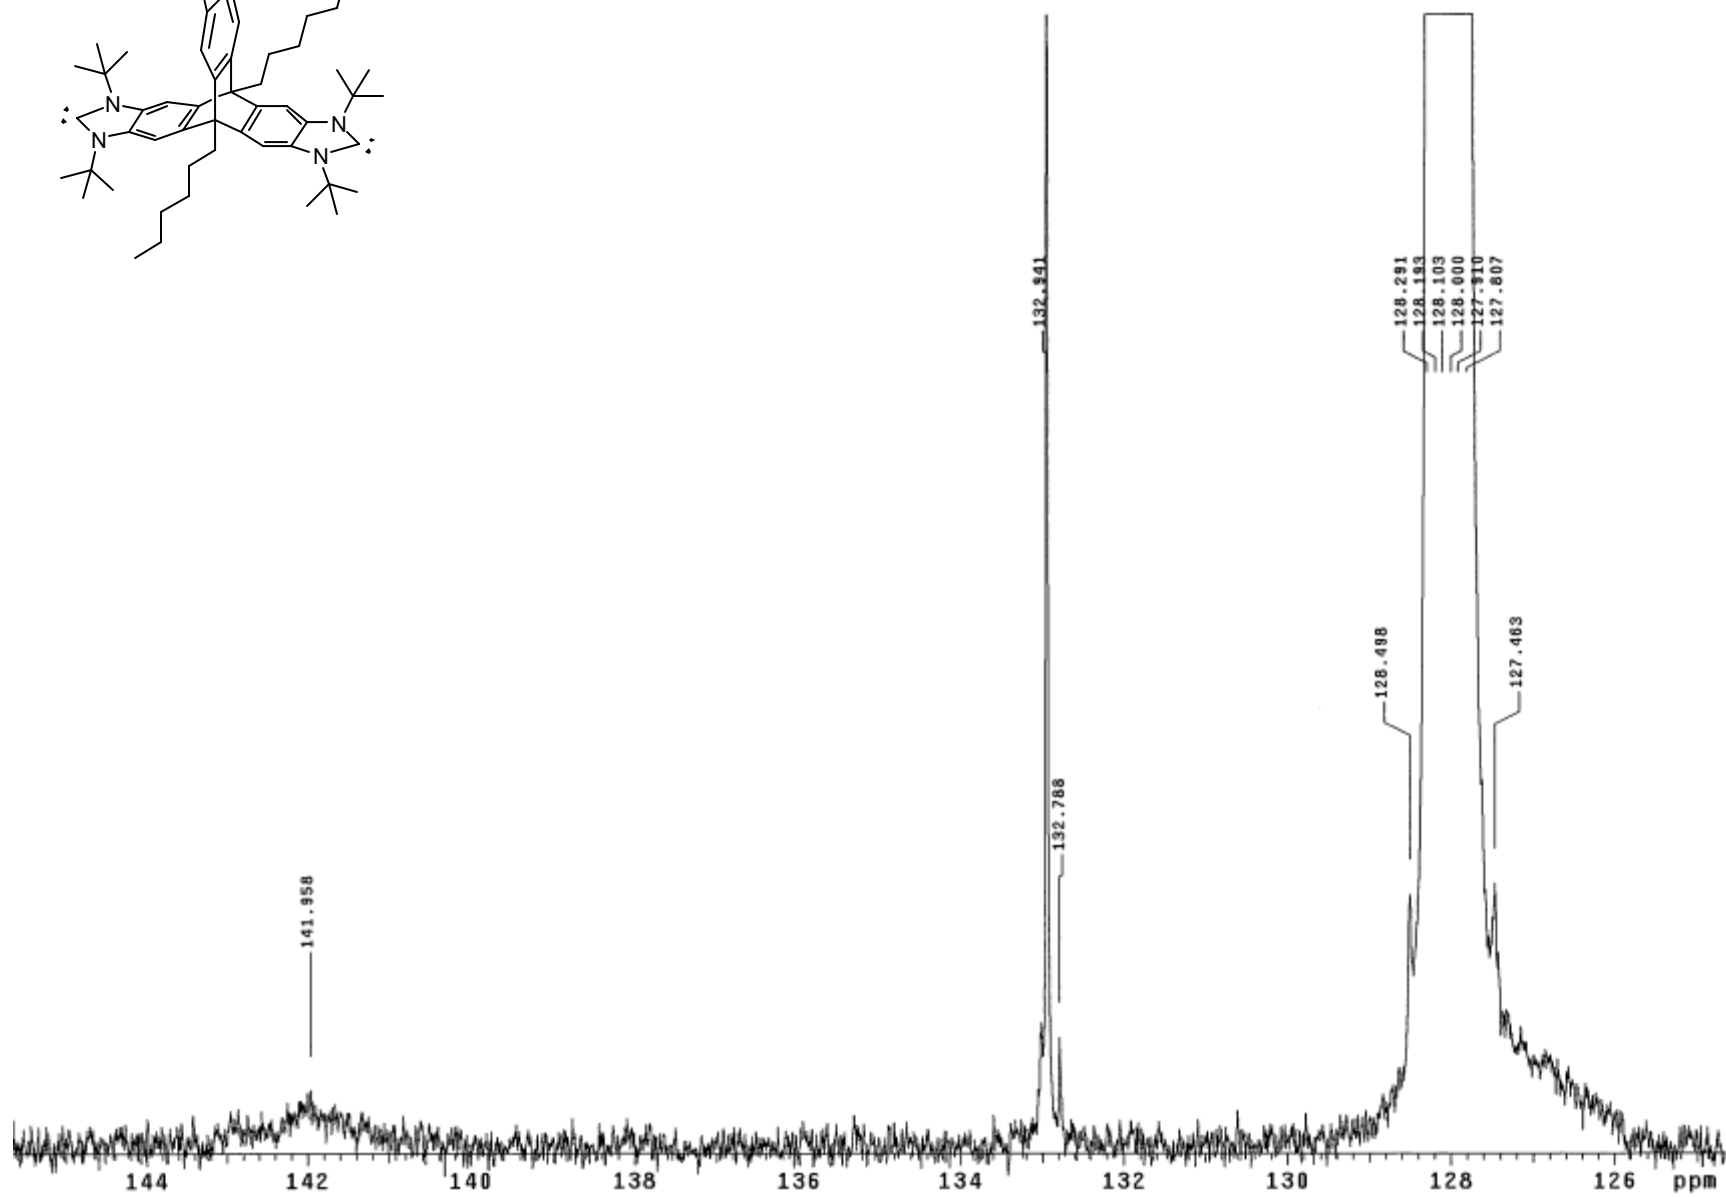

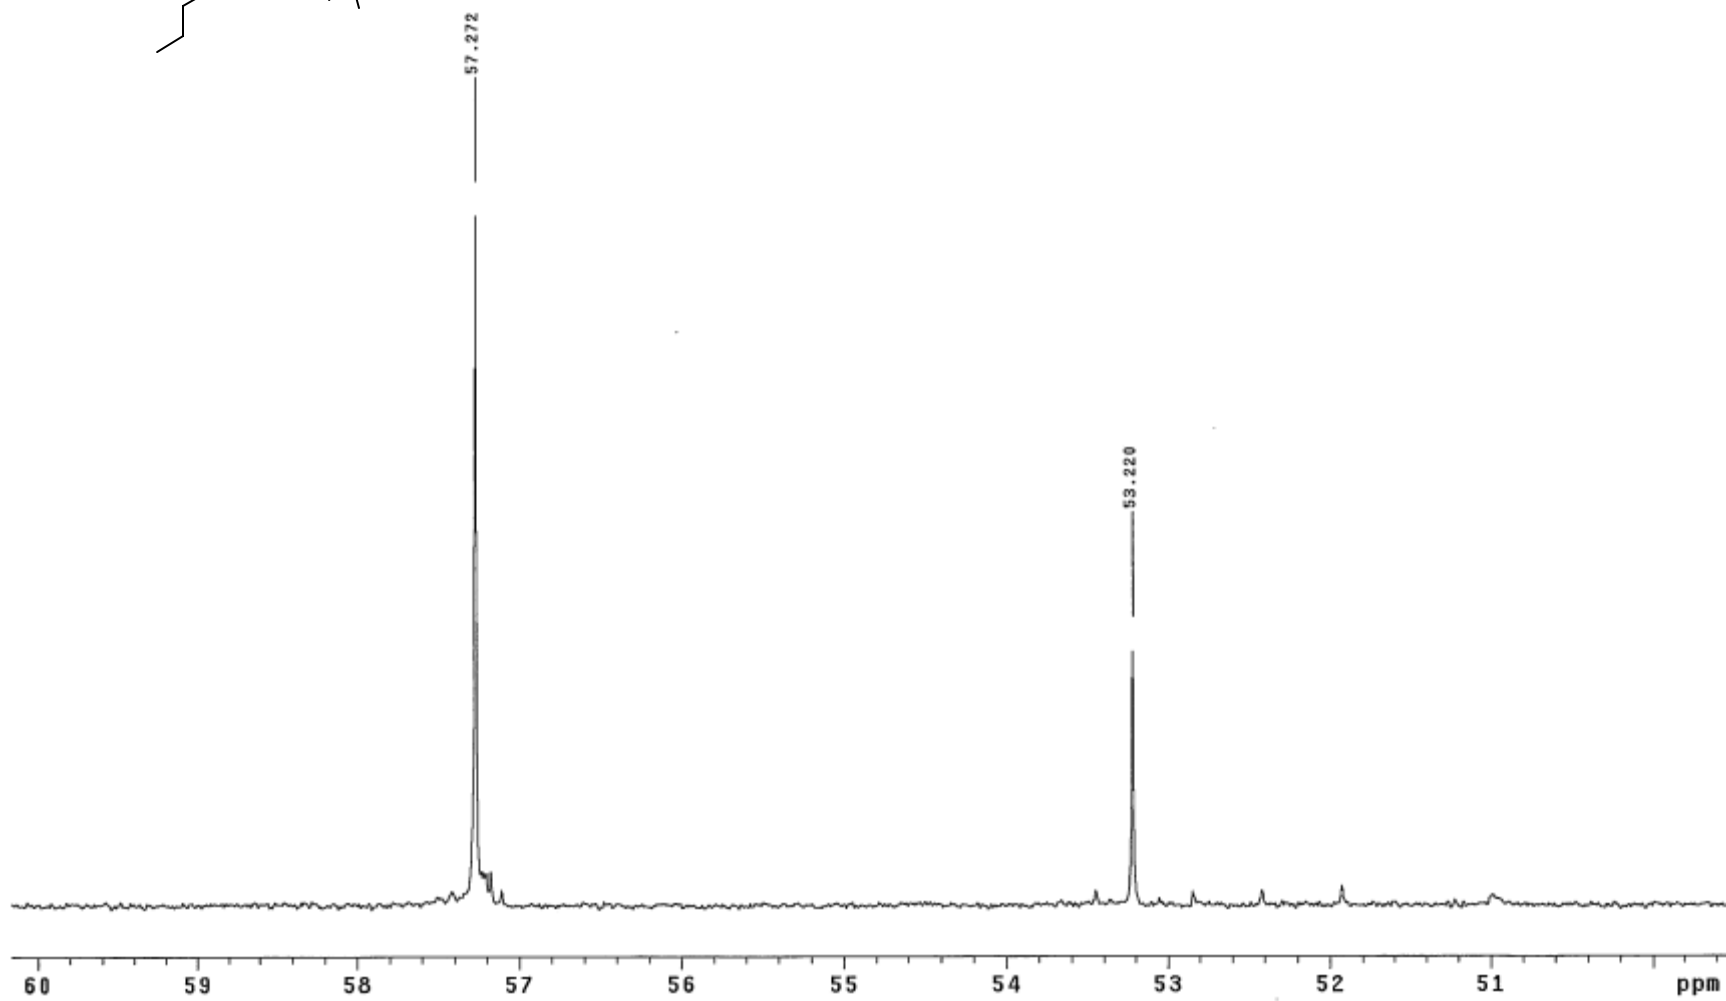



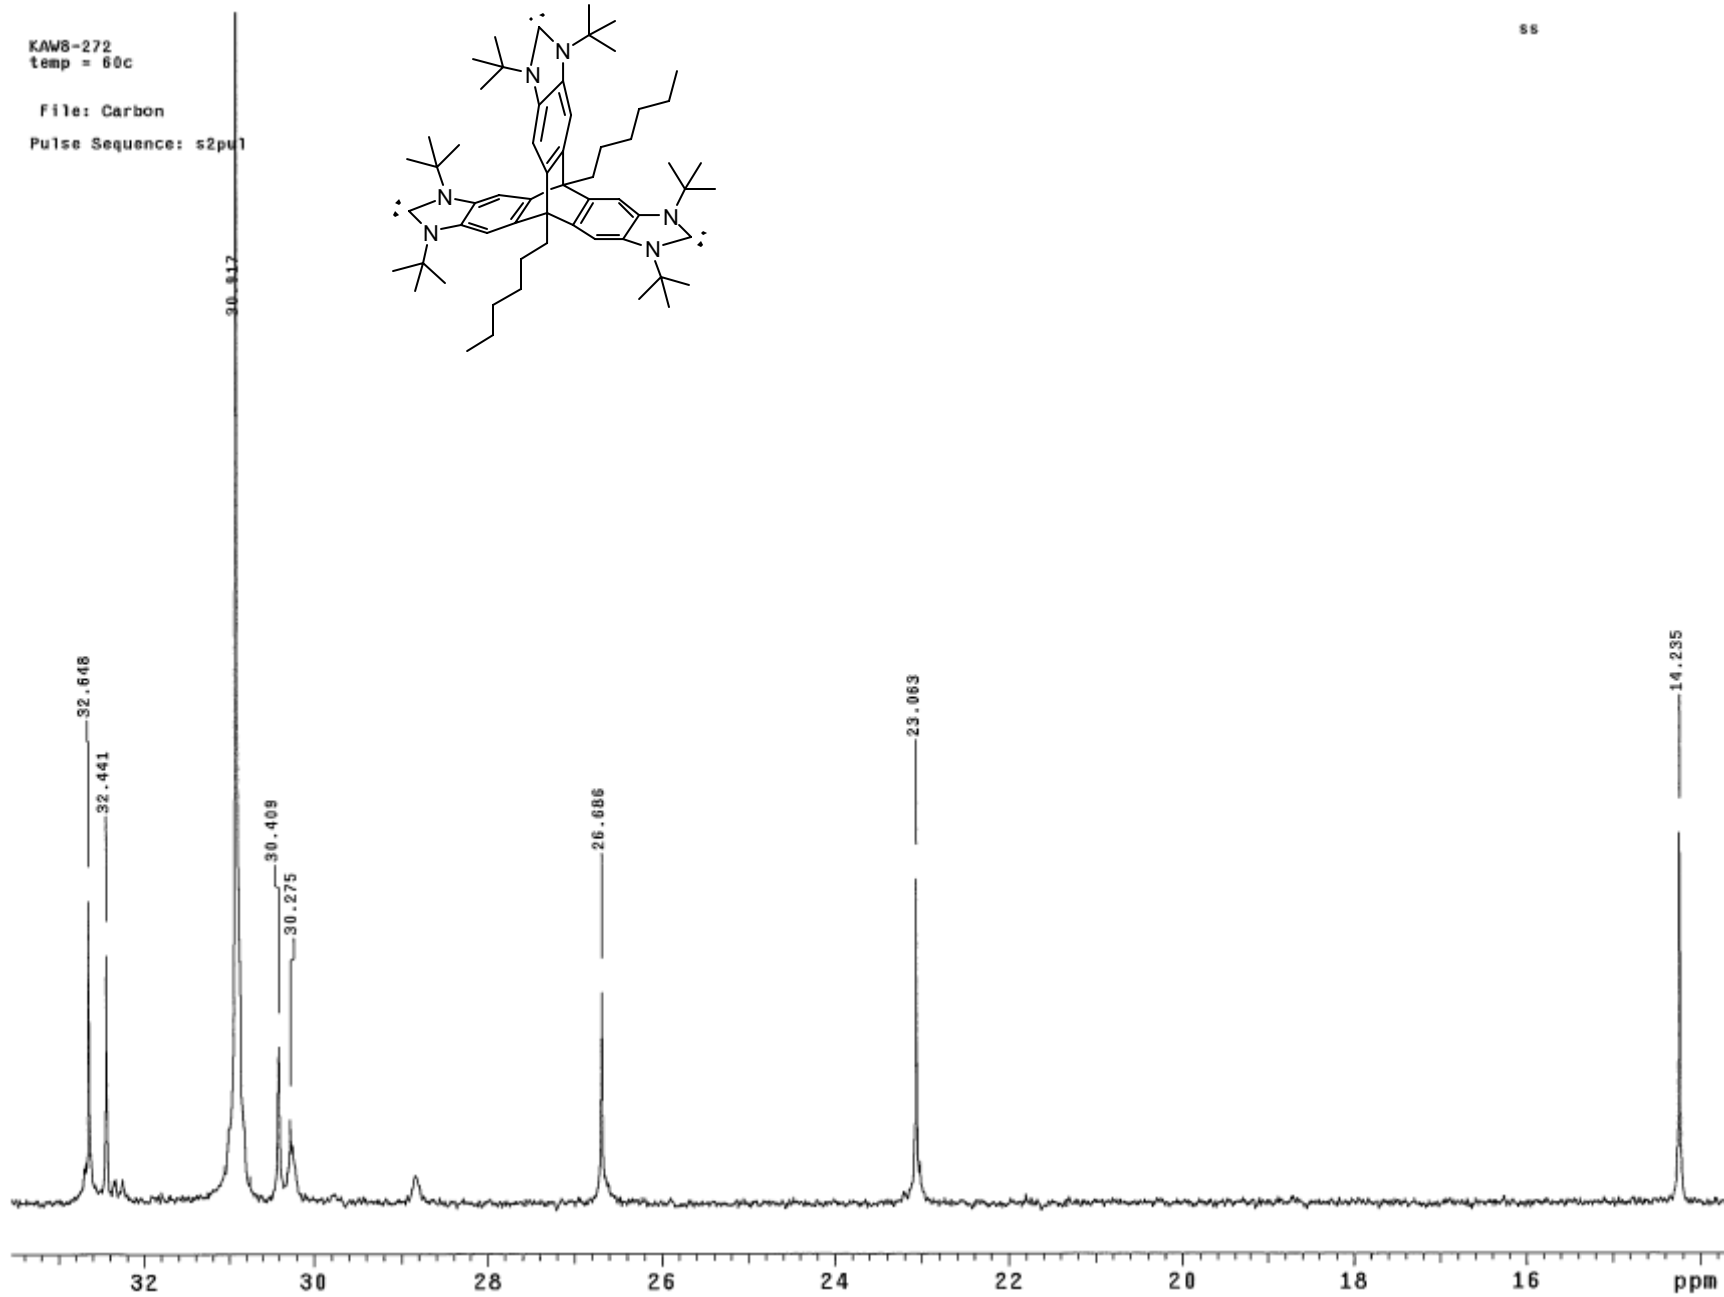

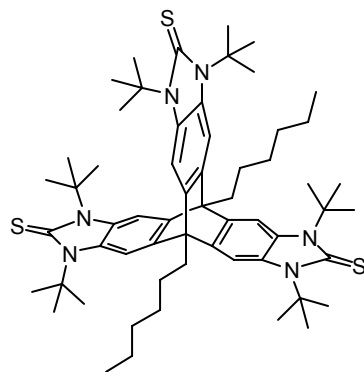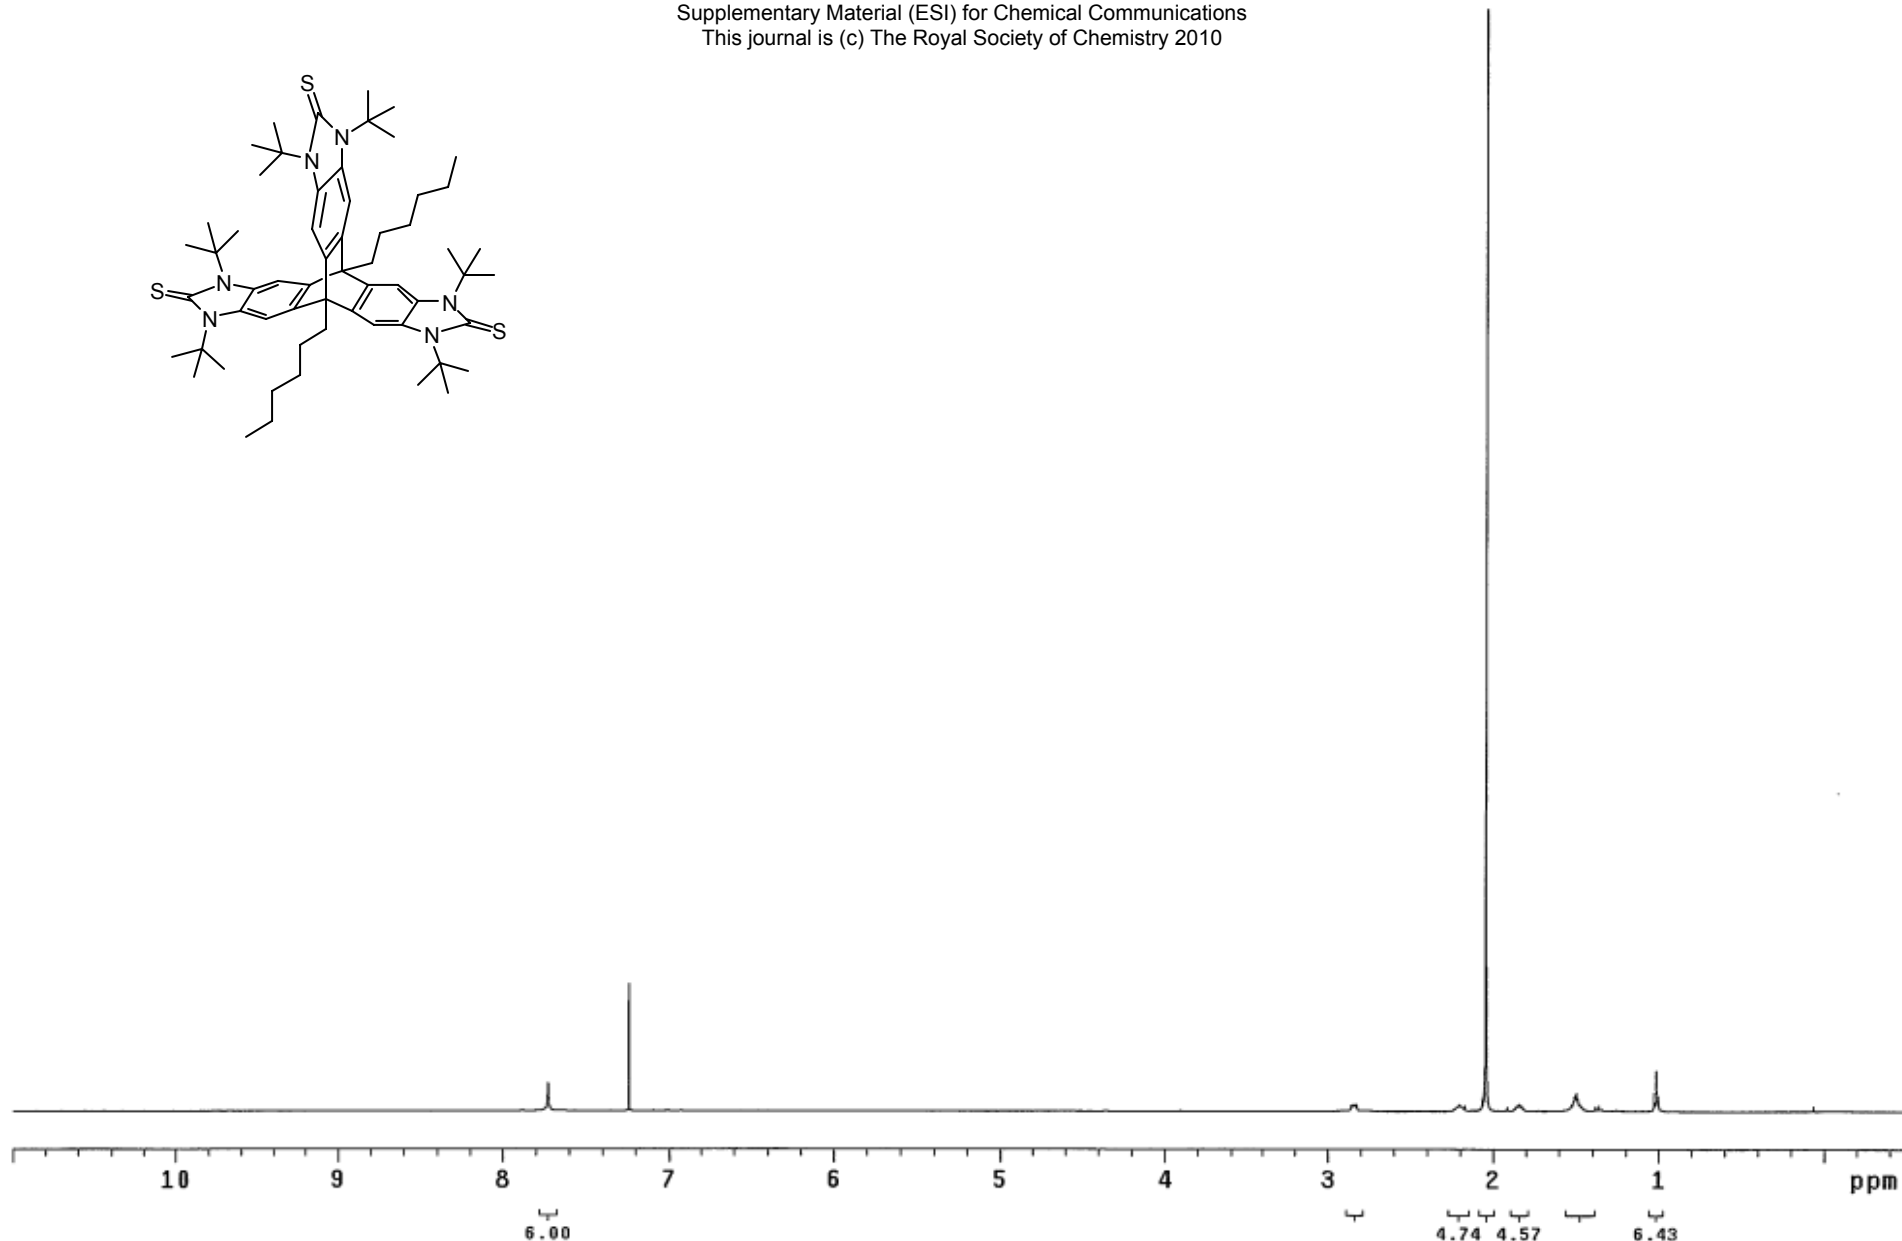

|                                                                                                                                   |                                |                                                                                           |                                                                                                             |
|-----------------------------------------------------------------------------------------------------------------------------------|--------------------------------|-------------------------------------------------------------------------------------------|-------------------------------------------------------------------------------------------------------------|
| <b>PULSE SEQUENCE</b><br>Relax. delay 2.000 sec<br>Pulse 15.0 degrees<br>Acq. time 4.001 sec<br>Width 7997.6 Hz<br>64 repetitions | <b>OBSERVE</b> H1, 499.8645248 | <b>DATA PROCESSING</b><br>Line broadening 0.1 Hz<br>FT size 65536<br>Total time 6 minutes | <b>KAW8-290</b><br>temp = 50c<br><br>Archive directory:<br>Sample directory:<br><br>Pulse: S80H0059:3532V1x |
|-----------------------------------------------------------------------------------------------------------------------------------|--------------------------------|-------------------------------------------------------------------------------------------|-------------------------------------------------------------------------------------------------------------|

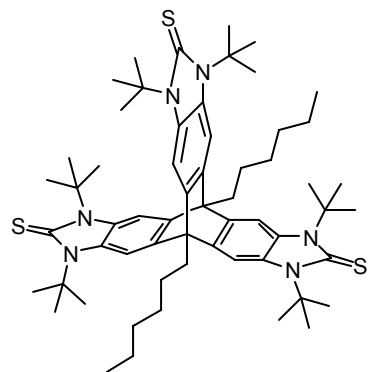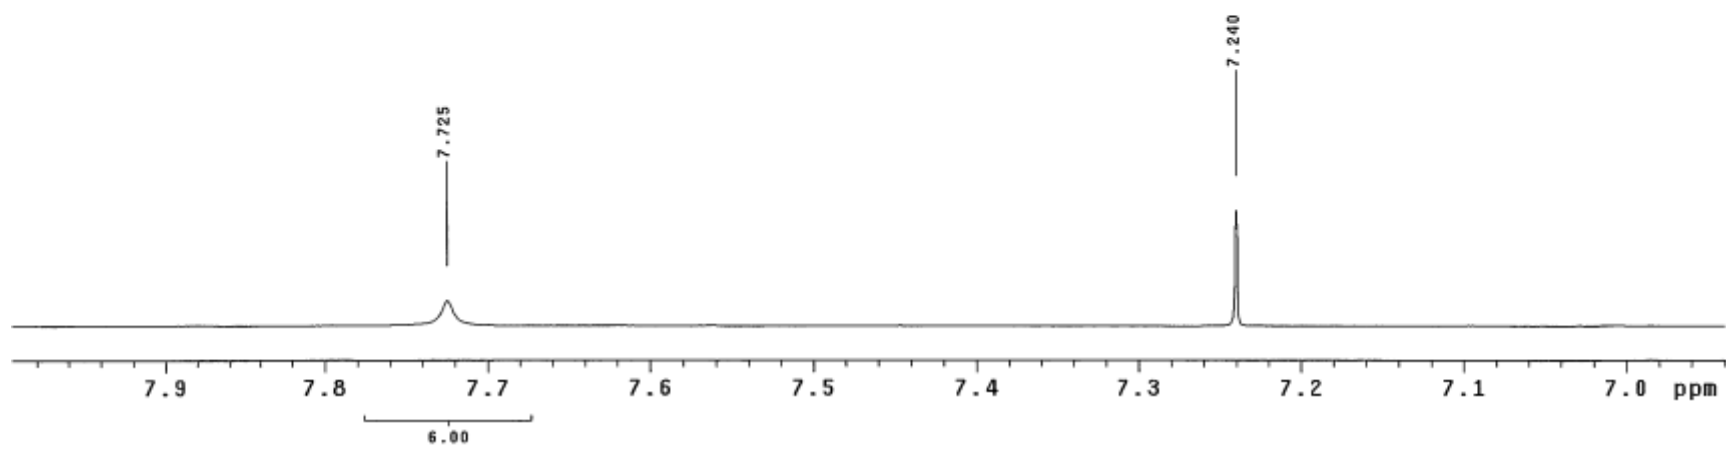

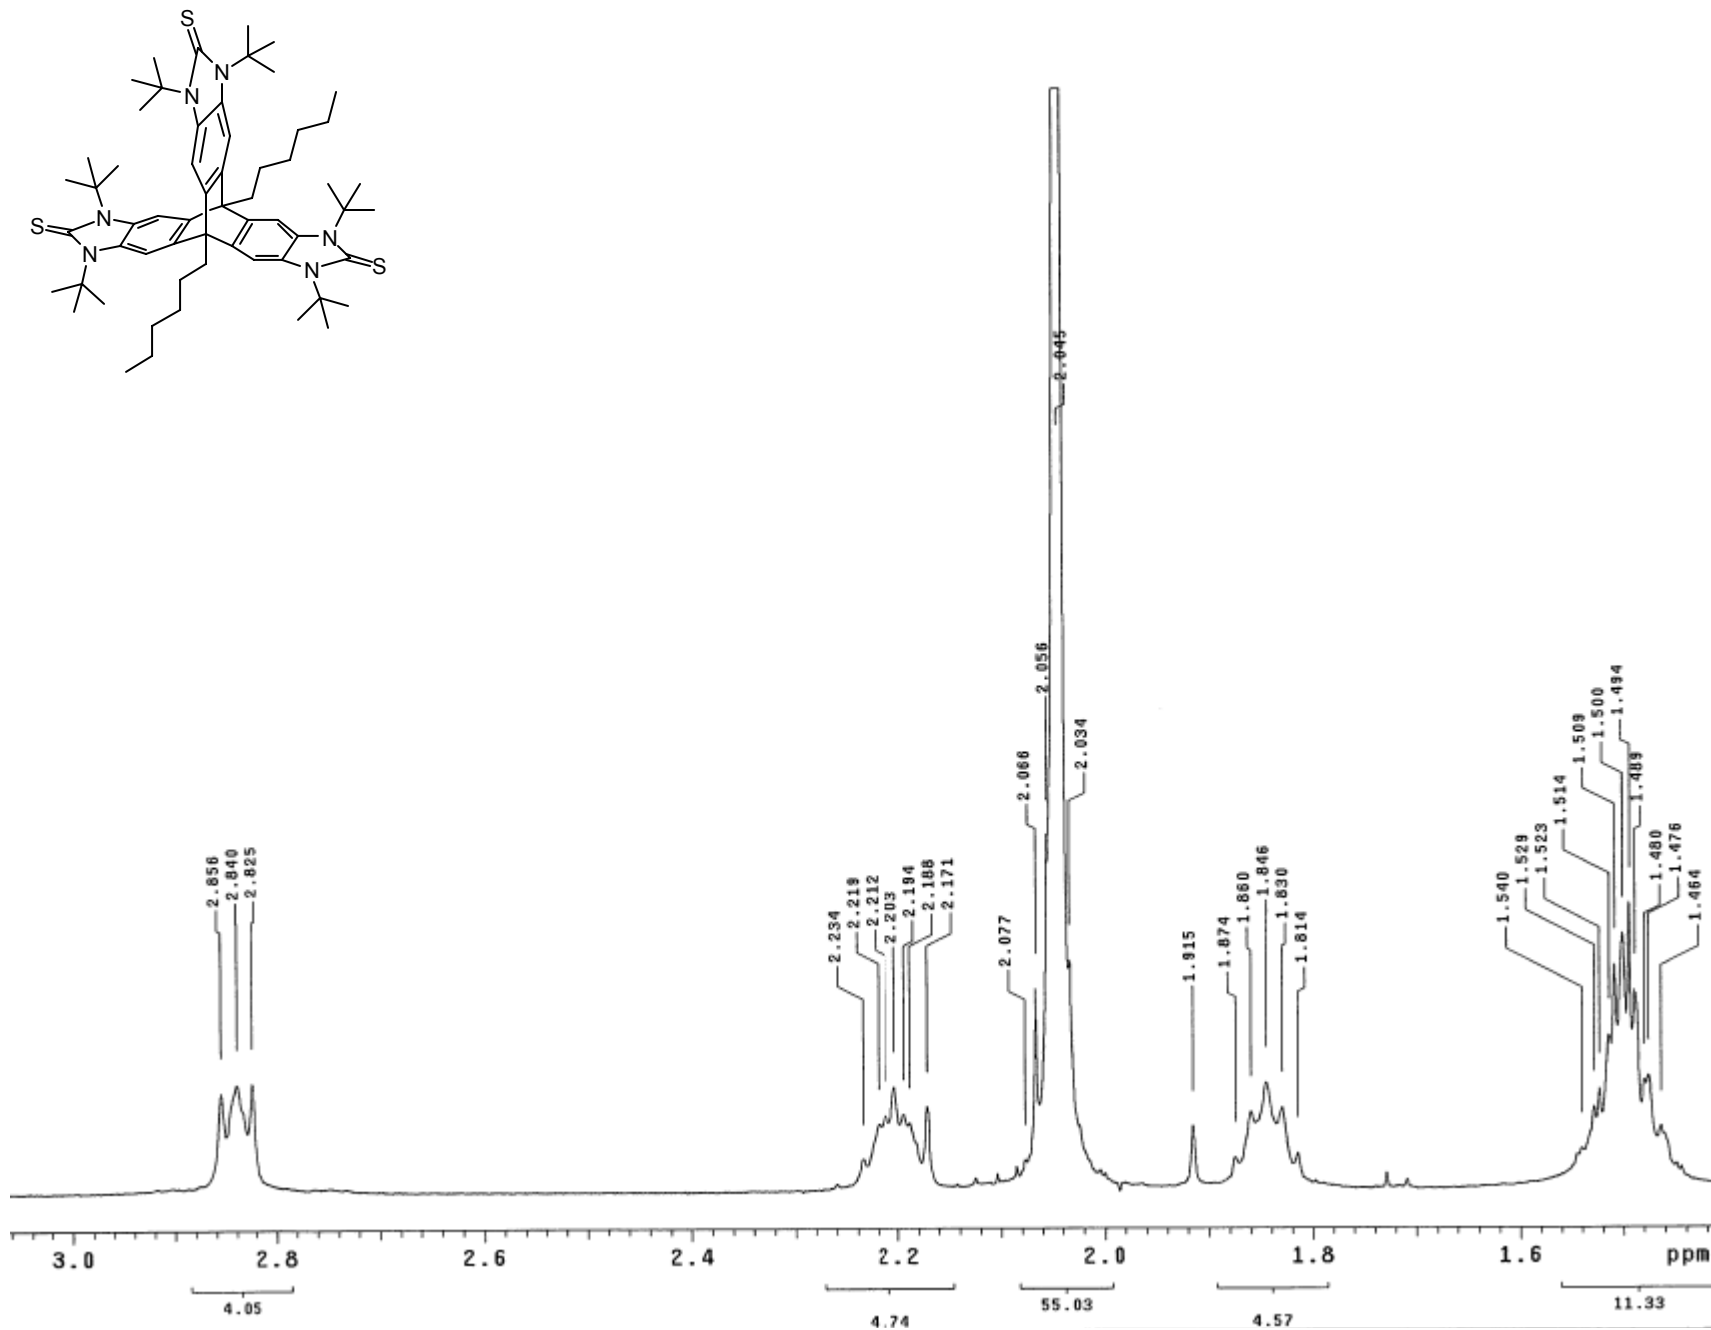

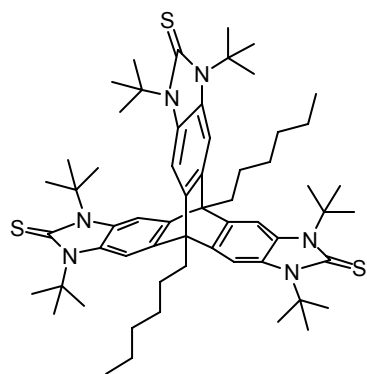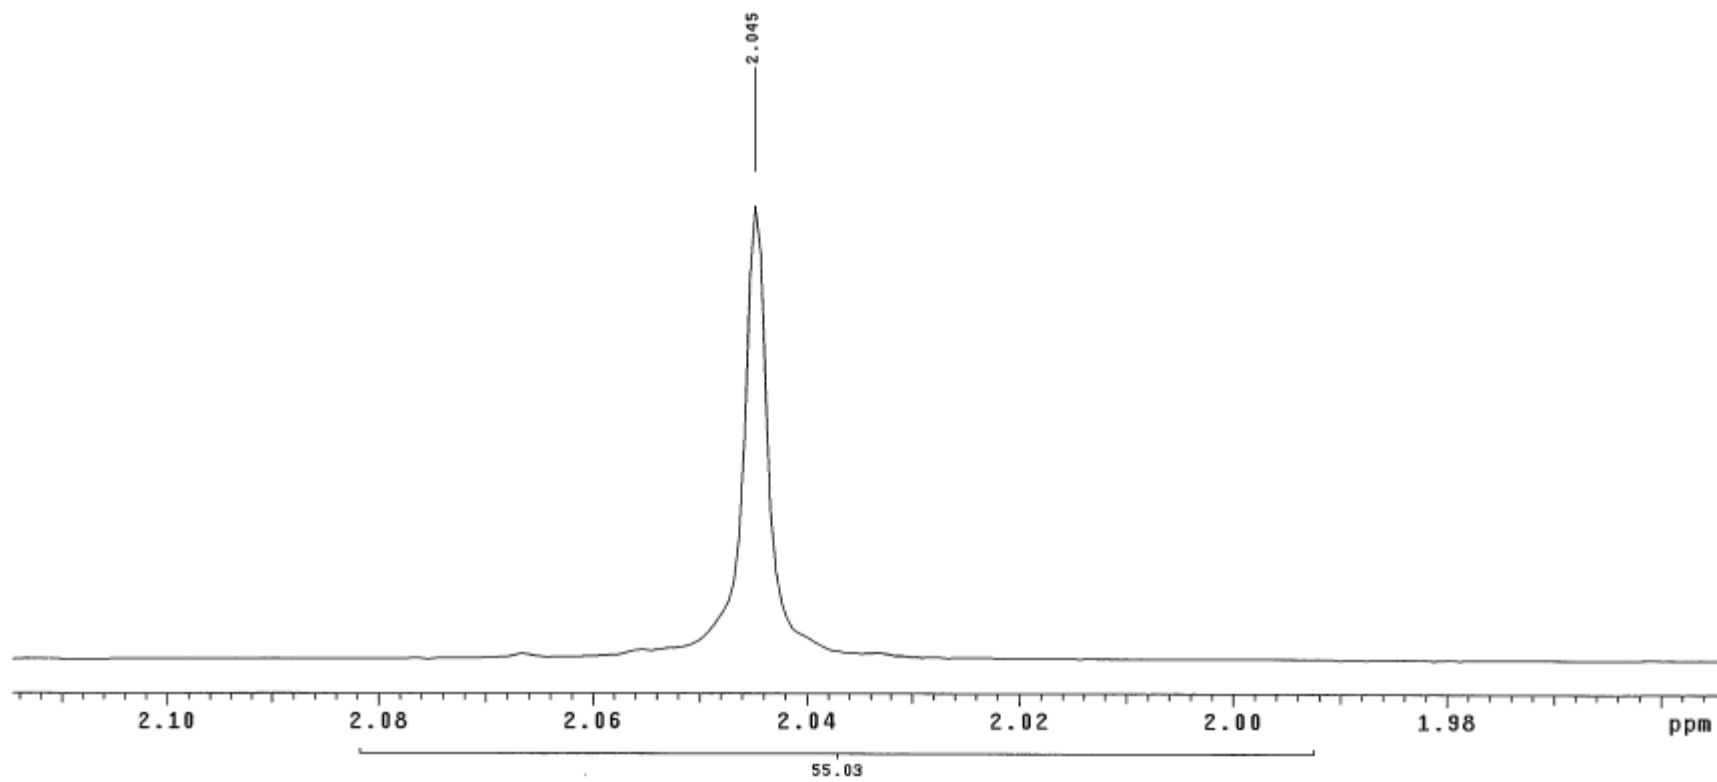

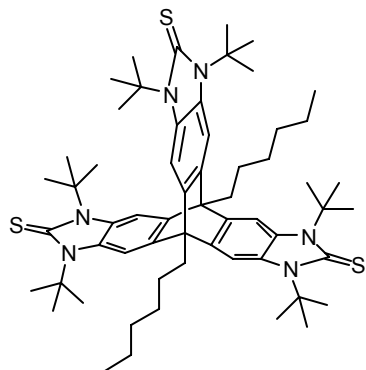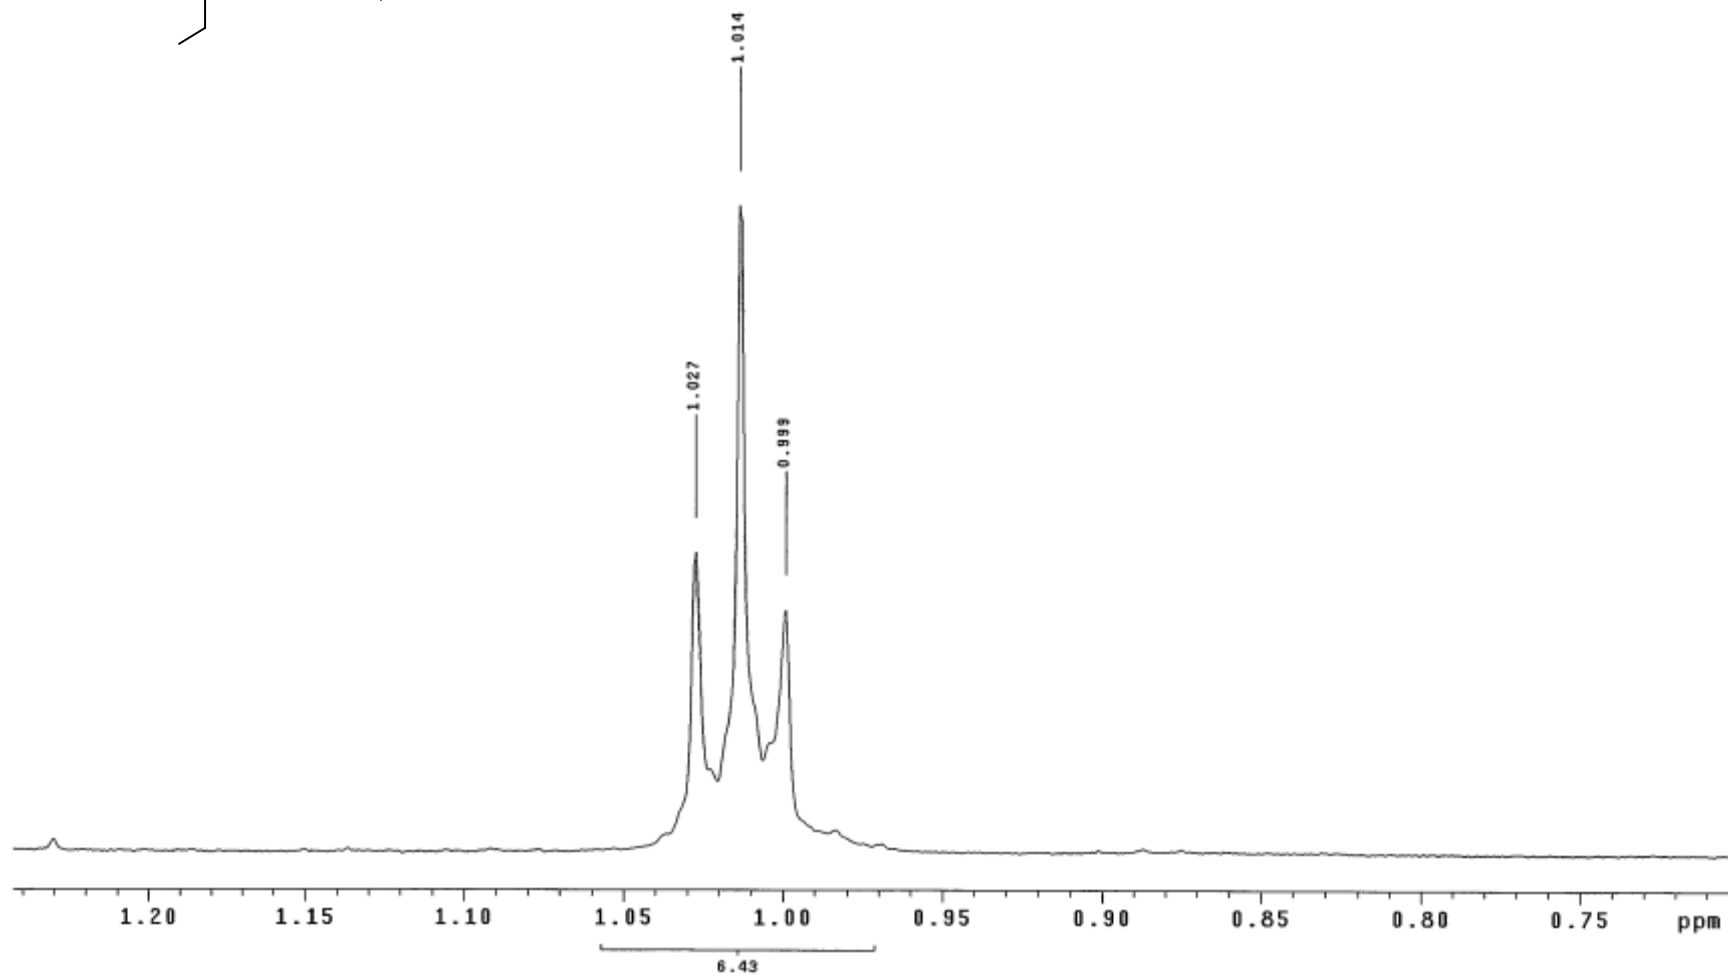

600 MHz nmrox

KAW8-255  
temp = 50c

exp4 Carbon

| SAMPLE      |             | SPECIAL    |          |
|-------------|-------------|------------|----------|
| date        | Feb 15 2010 | temp       | 50.0     |
| solvent     | cdc13       | gain       | 40       |
| file        | exp         | spin       | 20       |
| ACQUISITION |             | hst        | 0.008    |
| sw          | 40322.6     | pw90       | 7.800    |
| at          | 2.000       | alfa       | 10.000   |
| np          | 161230      | FLAGS      |          |
| fb          | 17000       | il         | n        |
| bs          | 64          | in         | n        |
| d1          | 2.000       | dp         | y        |
| nt          | 13000       | hs         | nn       |
| ct          | 13000       | PROCESSING |          |
| TRANSMITTER |             | lb         | 1.00     |
| tn          | C13         | fn         | not used |
| sfrq        | 150.824     | DISPLAY    |          |
| tof         | 2296.3      | sp         | -754.2   |
| tpwr        | 58          | wp         | 33931.4  |
| pw          | 2.600       | rf1        | 15170.5  |
| DECOUPLER   |             | rfp        | 11612.2  |
| dn          | H1          | rp         | 205.1    |
| dof         | 0           | lp         | 18.9     |
| dm          | yyy         | PLOT       |          |
| dmm         | w           | wc         | 250      |
| dpwr        | 46          | sc         | 0        |
| dmf         | 15337       | vs         | 12738    |
|             |             | th         | 13       |
|             |             | ai         | cdc ph   |

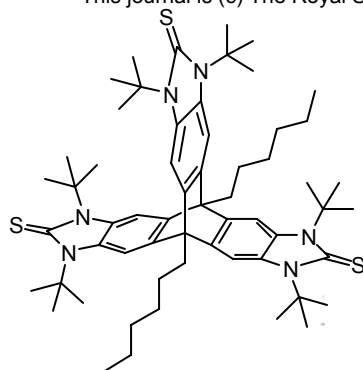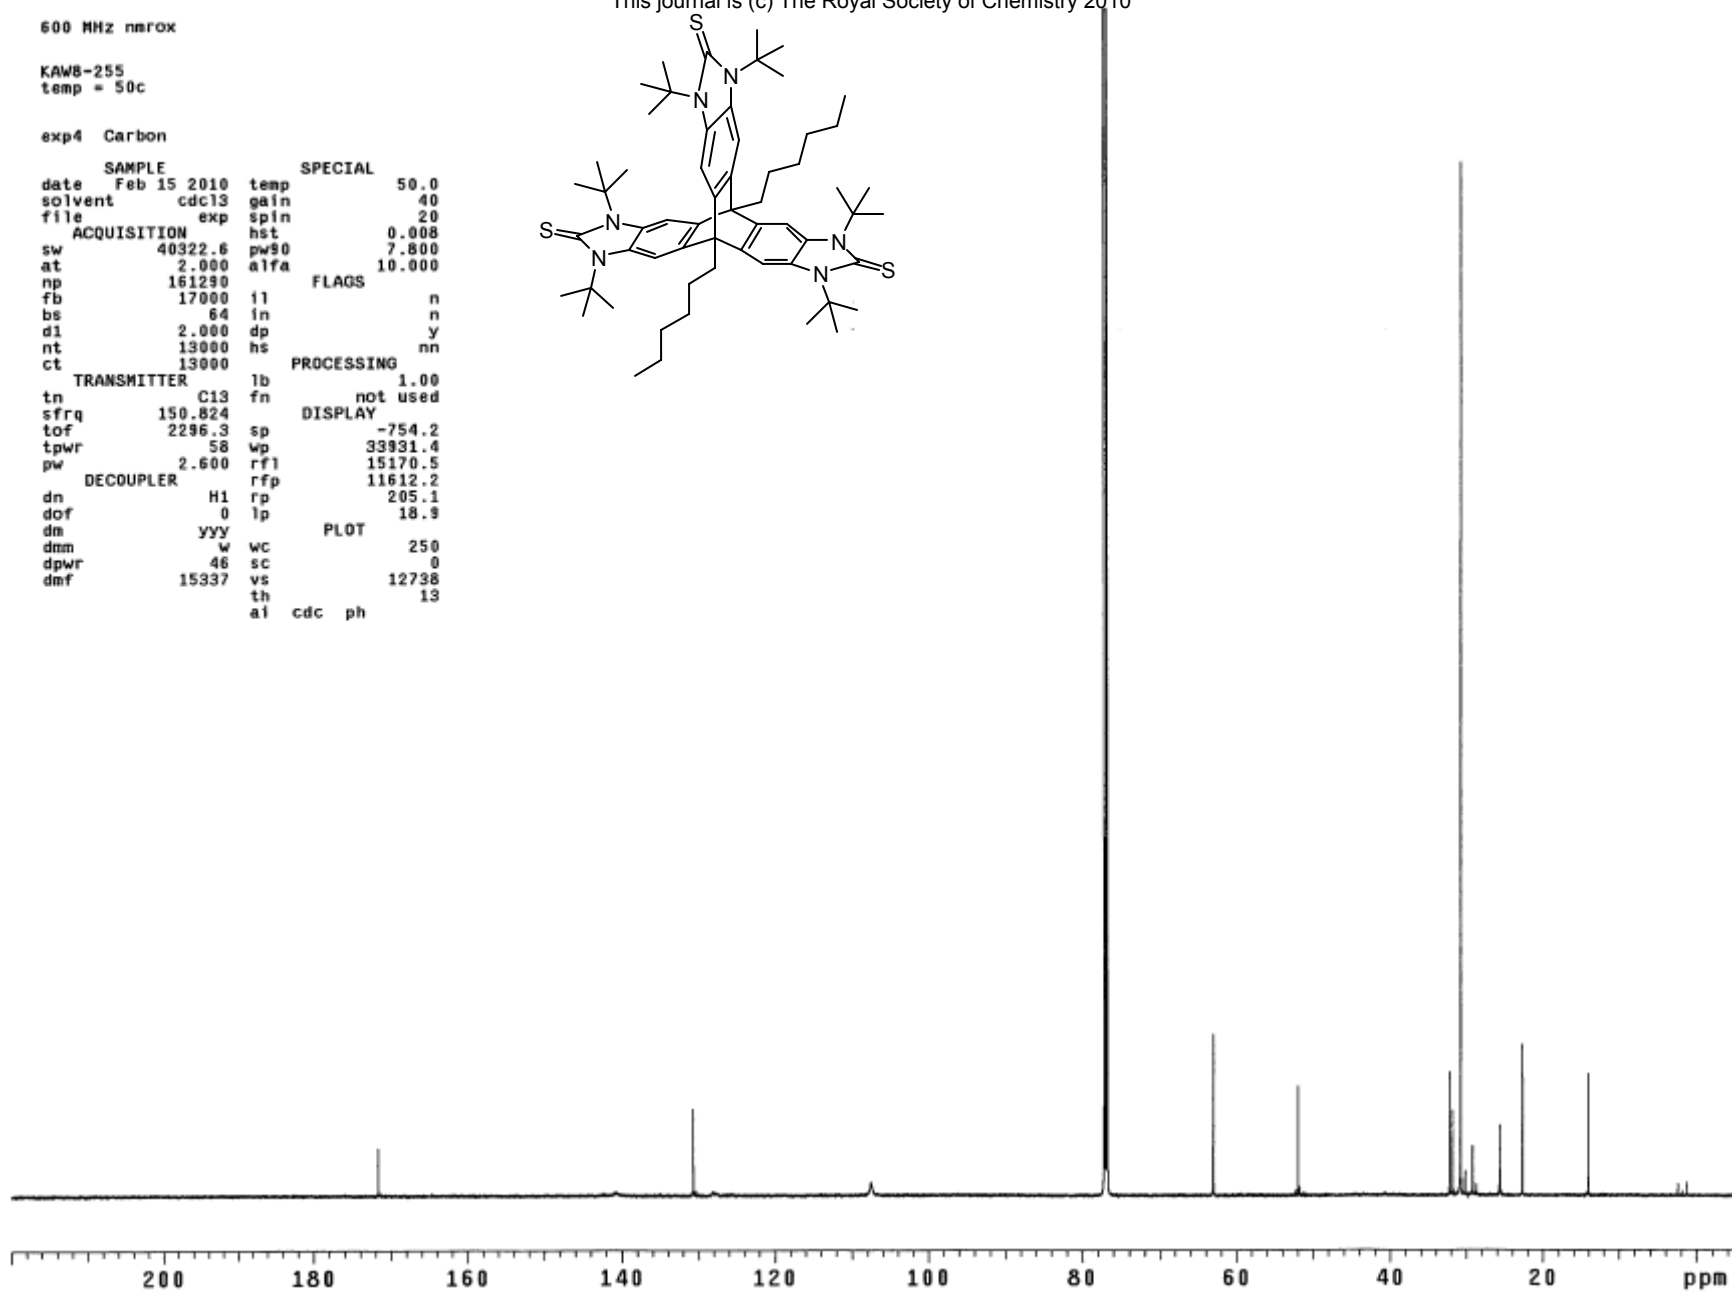

KAW8-255  
temp = 50c

File: xp

Pulse Sequence: s2pu1

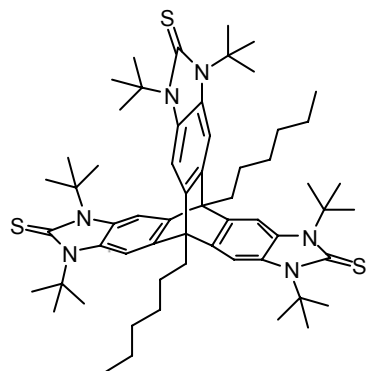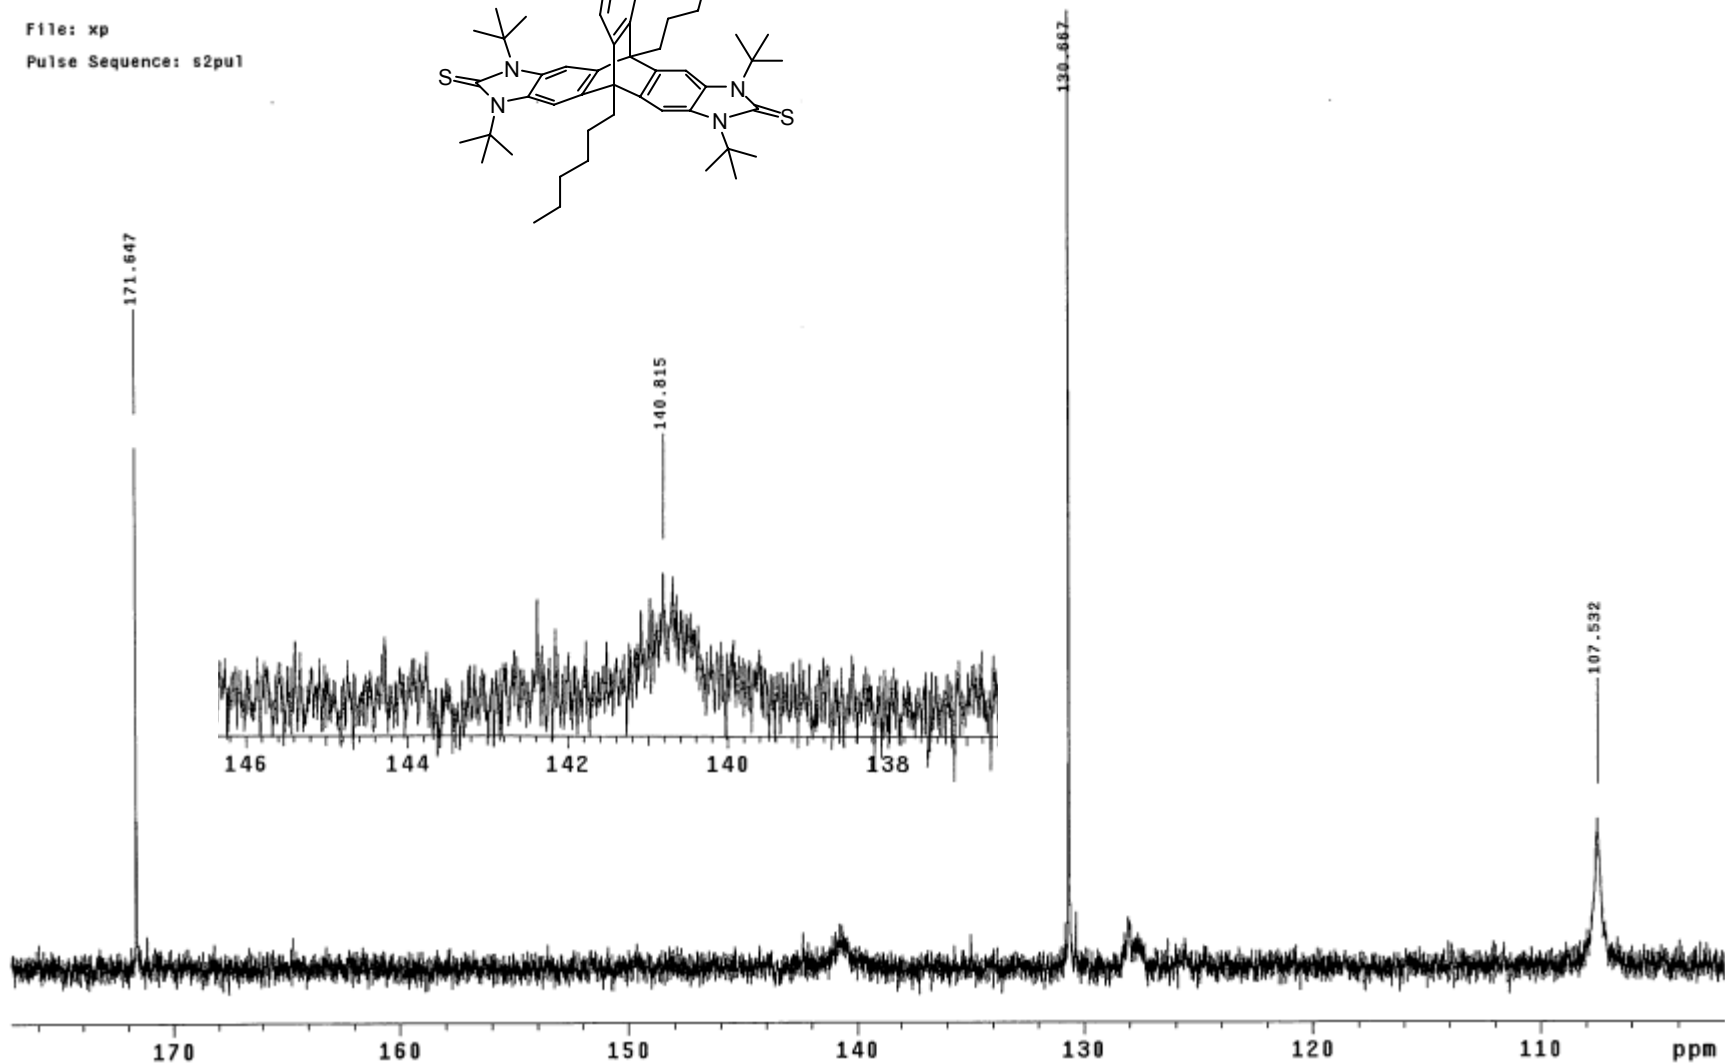





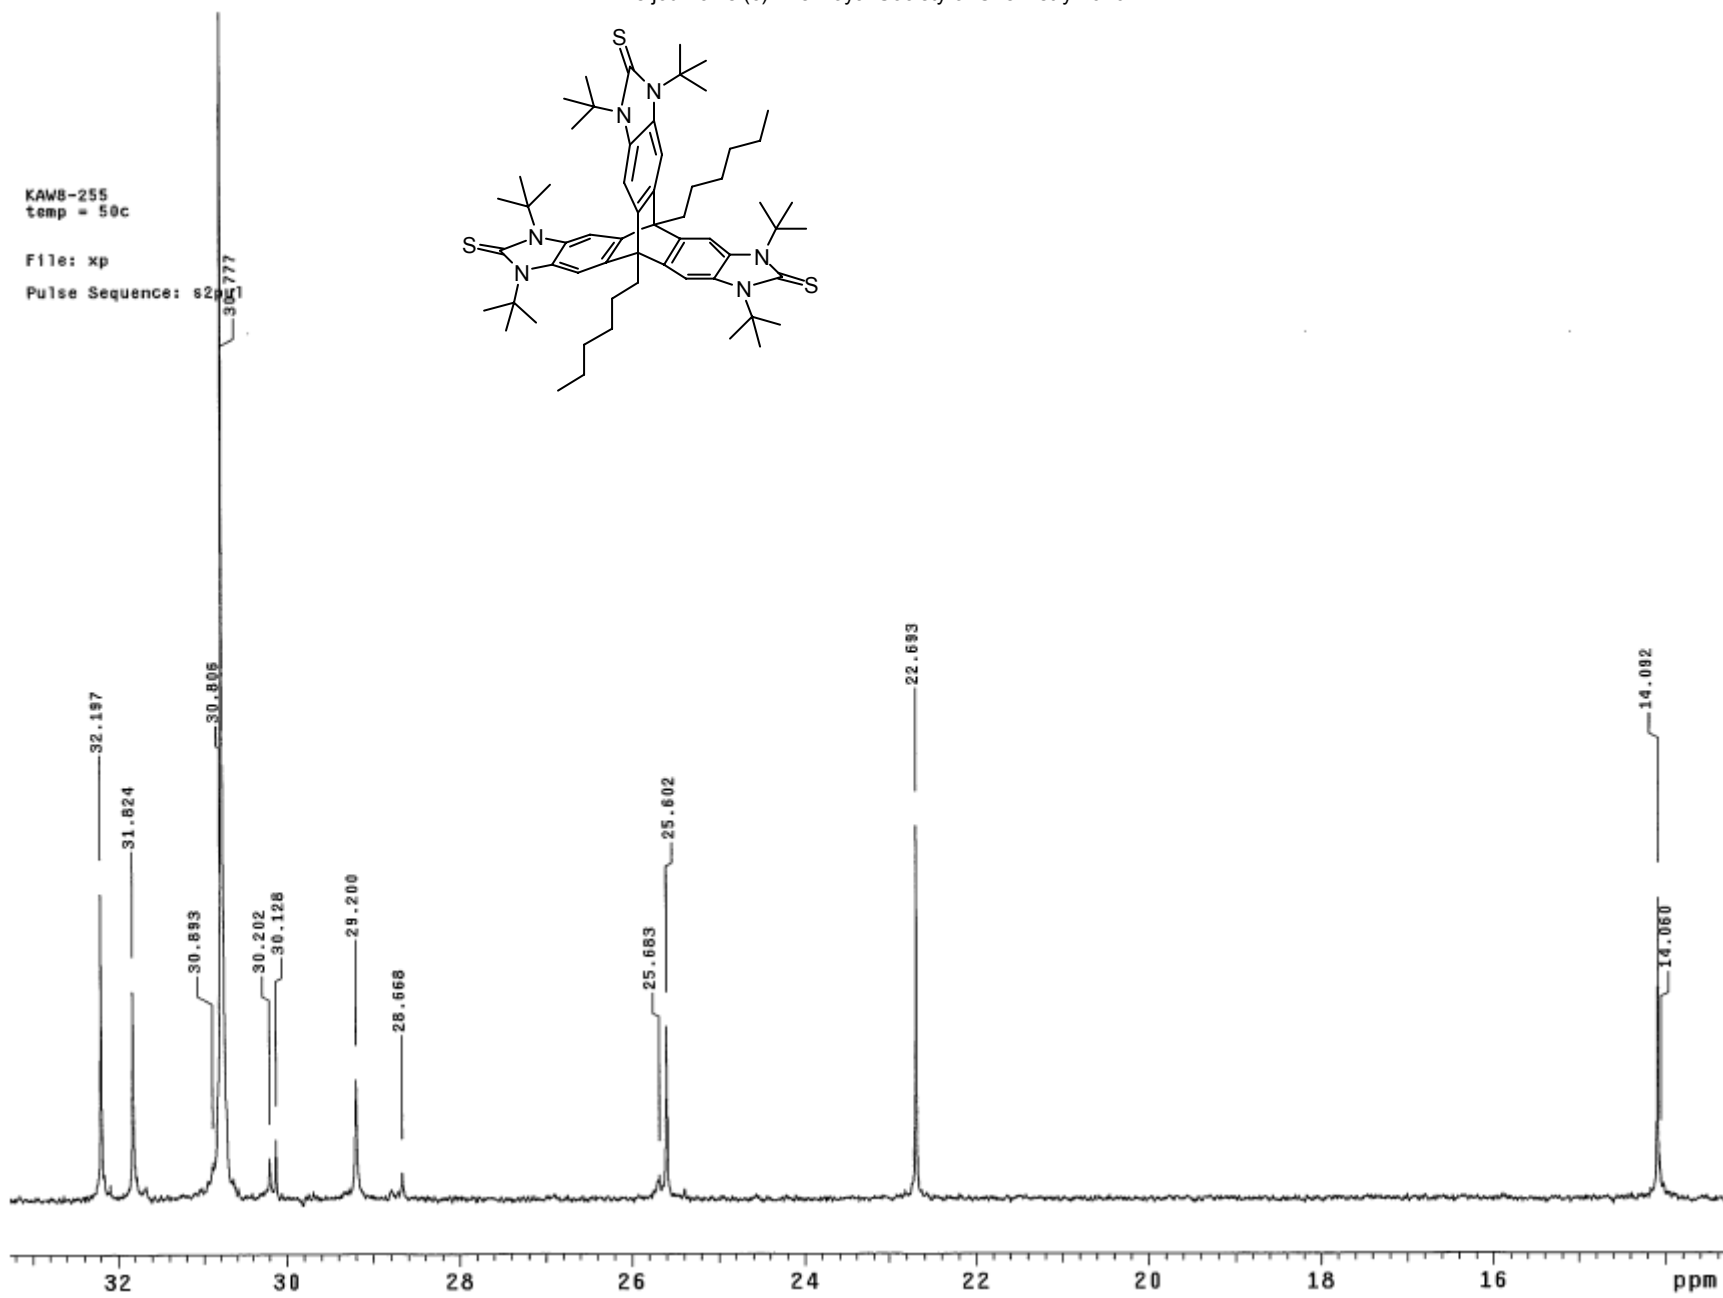

Supplement: c0cc01070g.pdf [file c0cc01070g.pdf]
